# Supplementary material for: Metal-free site selective cross-coupling of pyridines with secondary phosphine chalcogenides using acylacetylenes as oxidants
Source: Royal Society of Chemistry journal article supplement (doi:10.1039/c8cc01155a), 2018-01-01

## Supporting Information

### **Metal-free site selective cross-coupling of pyridines with secondary phosphine chalcogenides using acylacetylenes as oxidants**

Boris A. Trofimov<sup>\*,a</sup>, Pavel A. Volkov,<sup>a</sup> Kseniya O. Khrapova,<sup>a</sup> Anton A.  
Telezhkin,<sup>a</sup> Nina I. Ivanova,<sup>a</sup> Alexander I. Albanov,<sup>a</sup>  
Nina K. Gusarova,<sup>a</sup> Oleg N. Chupakhin<sup>b</sup>

<sup>a</sup> *A.E. Favorsky Irkutsk Institute of Chemistry, Siberian Branch of the Russian Academy of Sciences, 1 Favorsky St., Irkutsk 664033, Russian Federation*

<sup>b</sup> *I.Ya. Postovsky Institute of Organic Synthesis, Ural Branch of the Russian Academy of Sciences, 22/20 S. Kovalevskoi/Akademicheskaya St., Ekaterinburg 620219, Russian Federation*

\*E-mail: [boris\\_trofimov@irioch.irk.ru](mailto:boris_trofimov@irioch.irk.ru)

#### **Table of contents**

|                            |            |
|----------------------------|------------|
| <b>General information</b> | <b>S2</b>  |
| <b>Typical procedure</b>   | <b>S3</b>  |
| <b>Analytical data</b>     | <b>S4</b>  |
| <b>NMR Spectra</b>         | <b>S16</b> |

## General information

All reactions were carried out under an argon atmosphere. Pyridines **1a,b** and diphenylphosphine oxide **2a** are commercial reagents (Alfa Aesar). Diphenylphosphine sulfide **2e** was prepared by oxidation of commercially available diphenylphosphine (Aldrich) with elemental sulfur.<sup>1</sup> Secondary phosphine chalcogenides **2b-d,f-j** were prepared from styrene, 4-chlorostyrene,  $\alpha$ -methylstyrene and elemental phosphorus as previously described.<sup>2</sup> Acylacetylenes **3a-d** were prepared by the reported methods.<sup>3</sup> The reaction was monitored using <sup>31</sup>P NMR spectra by the disappearance of peaks of the initial secondary phosphine chalcogenides.

The <sup>1</sup>H, <sup>13</sup>C, <sup>15</sup>N, <sup>31</sup>P and <sup>77</sup>Se NMR spectra were recorded on a Bruker DPX 400 and Bruker AV-400 spectrometer (400.13, 100.62, 40.56, 161.98 and 76.31 MHz, respectively) in CDCl<sub>3</sub> solutions and referenced to HMDS (<sup>1</sup>H, <sup>13</sup>C), MeNO<sub>2</sub> (<sup>15</sup>N), H<sub>3</sub>PO<sub>4</sub> (<sup>31</sup>P) and Me<sub>2</sub>Se (<sup>77</sup>Se). The assignment of signals in <sup>1</sup>H spectra was performed using 2D homonuclear correlation method COSY. Resonance signals of <sup>13</sup>C were assigned with application of 2D heteronuclear correlation methods HSQC and HMBC. The values of the  $\delta$  <sup>15</sup>N were measured through the 2D <sup>1</sup>H–<sup>15</sup>N HMBC experiment. FT-IR spectra were obtained with a Varian 3100 FT-IR spectrometer. The C, H, N microanalyses were performed on a Flash EA 1112 Series elemental analyzer. The Cl, P, S and Se content were determined by combustion method.

---

<sup>1</sup> Peters, G. *J. Am. Chem. Soc.* **1960**, *82*, 4751–4751.

<sup>2</sup> (a) Trofimov, B. A.; Brandsma, L.; Arbuzova, S. N.; Malysheva, S. F.; Gusarova, N. K. *Tetrahedron Lett.* **1994**, *35*, 7647–7650. (b) Gusarova, N. K.; Bogdanova, M. V.; Ivanova, N. I.; Chernysheva, N. A.; Sukhov, B. G.; Sinegovskaya, L. M.; Kazheva, O. N.; Alexandrov, G. G.; D'yachenko, O. A.; Trofimov, B. A. *Synthesis* **2005**, 3103–3106. (c) Sukhov, B. G.; Gusarova, N. K.; Ivanova, N. I.; Bogdanova, M. V.; Kazheva, O. N.; Alexandrov, G. G.; Dyachenko, O. A.; Sinegovskaya, L. M.; Malysheva, S. F.; Trofimov, B. A. *J. Struct. Chem.* **2005**, *46*, 1066–1071. (d) Malysheva, S. F.; Artem'ev, A. V.; Gusarova, N. K.; Timokhin, B. V.; Tatarinova, A. A.; Trofimov, B. A. *Russ. J. Gen. Chem.* **2009**, *79*, 1617–1621. (e) Gusarova, N. K.; Arbuzova, S. N.; Trofimov, B. A. *Pure Appl. Chem.* **2012**, *84*, 439–459. (f) Artemrev, A. V.; Malysheva, S. F.; Gusarova, N. K.; Korocheva, A. O.; Timokhina, L. V.; Trofimov, B. A. *Russ. Chem. Bull.* **2013**, *62*, 2495–2497.

<sup>3</sup> (a) Zanina, A. S.; Shergina, S. I.; Sokolov, I. E.; Myasnikova, R. N. *Russ. Chem. Bull.* **1995**, *44*, 689–694. (b) Zhang, X.; Lu, Z.; Fu, C.; Ma, S. *Org. Biomol. Chem.* **2009**, *7*, 3258–3263. (c) Whittaker, R. E.; Dermenci, A.; Dong, G. *Synthesis* **2016**, *48*, 161–183.

## Typical procedure

**Synthesis of 4-chalcogenophosphoryl pyridines 4a-j, 6a-d: General procedure.** A solution of pyridine **1a,b** (1.1 mmol), secondary phosphine chalcogenide **2a-j** (1.0 mmol) and acylacetylene **3a-d** (1.1 mmol) in MeCN (3 mL) was stirred under an argon atmosphere at 70–75 °C for 20–70 h (see also Table 1, Schemes 2 and 3). After completion of the reaction ( $^{31}\text{P}$  NMR monitoring), the solvent was removed under the reduced pressure. The obtained residue was purified by column chromatography on  $\text{SiO}_2$  (for pyridines **4a-d**, **6a-d**: ethylacetate; for pyridines **4e-j**: toluene/ $\text{Et}_2\text{O}$ , 1:2) to yield the target 4-chalcogenophosphoryl pyridine **4a-j**, **6a-d** and a mixture of the unreacted acetylene **3a-d** and ethene **5a-d**.

Ethenes **5a,b** were characterized ( $^1\text{H}$  NMR) in a mixture with **3a,b** (10–15%), whereas **5c,d** were isolated individually by recrystallization of the crude product from hexane. For secondary phosphine selenides **2i,j**, divinyl selenides **7**<sup>4</sup> were also identified in the reaction mixture. Therefore the fraction of acetylene **3a-d** and ethene **5a-d**, obtained from  $\text{SiO}_2$  column, was purified by column chromatography on neutral  $\text{Al}_2\text{O}_3$  via consecutive washing with a mixture of hexane/ $\text{Et}_2\text{O}$  (9:1) to separate acetylene **3a-d** and ethene **5a-d**, then with chloroform to collect divinyl selenides **7**.

---

<sup>4</sup> Volkov, P. A.; Gusarova, N. K.; Khrapova, K. O.; Telezhkin, A. A.; Ivanova, N. I.; Albanov, A. I.; Trofimov, B. A. *J. Organomet. Chem.* **2017**, DOI: 10.1016/j.jorganchem.2017.09.031.

## Analytical data

### 4-(Diphenylphosphoryl)pyridine (4a).<sup>5</sup>

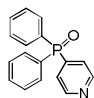

Yield: 159 mg (57%); beige powder, mp 150–151 °C (published data<sup>5</sup>: 153–155 °C) (reprecipitated from CCl<sub>4</sub> to hexane).

<sup>1</sup>H NMR (400.13 MHz, CDCl<sub>3</sub>): *d* 7.57 (m, 12H, Ph; H<sub>3,5</sub>, Py), 8.74 (m, 2H, H<sub>2,6</sub>, Py).

<sup>13</sup>C NMR (100.62 MHz, CDCl<sub>3</sub>): *d* 125.8 (d, C<sub>3,5</sub>, Py, <sup>2</sup>J<sub>CP</sub> = 7.7 Hz), 128.9 (d, C<sub>m</sub>, <sup>3</sup>J<sub>CP</sub> = 12.3 Hz), 131.0 (d, C<sub>i</sub>, <sup>1</sup>J<sub>CP</sub> = 105.3 Hz), 132.0 (d, C<sub>o</sub>, <sup>2</sup>J<sub>CP</sub> = 10.0 Hz), 132.6 (C<sub>p</sub>), 142.2 (d, C<sub>4</sub>, Py, <sup>1</sup>J<sub>CP</sub> = 96.7 Hz), 150.0 (d, C<sub>2,6</sub>, Py, <sup>3</sup>J<sub>CP</sub> = 9.5 Hz).

<sup>15</sup>N NMR (40.56 MHz, CDCl<sub>3</sub>): *d* -58.9.

<sup>31</sup>P NMR (161.98 MHz, CDCl<sub>3</sub>): *d* 27.6.

IR (neat):  $\nu_{\max}$  = 3056, 2980, 1674, 1584, 1540, 1484, 1437, 1402, 1316, 1256, 1196, 1123, 1073, 1025, 996, 812, 751, 727, 697, 546 cm<sup>-1</sup>.

Anal. Calcd for C<sub>17</sub>H<sub>14</sub>NOP: C, 73.11; H, 5.05; N, 5.02; P, 11.09. Found: C, 73.02; H, 5.22; N, 4.98; P, 10.93.

### 4-[Bis(2-phenylethyl)phosphoryl]pyridine (4b).

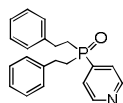

Yield: 228 mg (68%); yellow powder, mp 81–82 °C (reprecipitated from CCl<sub>4</sub> to hexane).

<sup>1</sup>H NMR (400.13 MHz, CDCl<sub>3</sub>): *d* 2.16, 2.33 (m, 4H, CH<sub>2</sub>P), 2.71, 2.98 (m, 4H, PhCH<sub>2</sub>), 7.09 (m, 4H, H<sub>o</sub>), 7.15 (m, 2H, H<sub>p</sub>), 7.22 (m, 4H, H<sub>m</sub>), 7.56 (m, 2H, H<sub>3,5</sub>, Py), 8.73 (m, 2H, H<sub>2,6</sub>, Py).

<sup>13</sup>C NMR (100.62 MHz, CDCl<sub>3</sub>): *d* 27.4 (d, PhCH<sub>2</sub>, <sup>2</sup>J<sub>CP</sub> = 3.2 Hz), 31.6 (d, CH<sub>2</sub>P, <sup>1</sup>J<sub>CP</sub> = 66.5 Hz), 124.4 (d, C<sub>3,5</sub>, Py, <sup>2</sup>J<sub>CP</sub> = 7.0 Hz), 126.6 (C<sub>p</sub>), 128.1 (C<sub>o</sub>), 128.7 (C<sub>m</sub>), 140.3 (d, C<sub>i</sub>, <sup>3</sup>J<sub>CP</sub> = 13.5 Hz), 141.8 (d, C<sub>4</sub>, Py, <sup>1</sup>J<sub>CP</sub> = 84.8 Hz), 150.1 (d, C<sub>2,6</sub>, Py, <sup>3</sup>J<sub>CP</sub> = 8.8 Hz).

<sup>15</sup>N NMR (40.56 MHz, CDCl<sub>3</sub>): *d* -60.2.

<sup>31</sup>P NMR (161.98 MHz, CDCl<sub>3</sub>): *d* 37.2.

IR (neat):  $\nu_{\max}$  = 3028, 2949, 2864, 1668, 1589, 1542, 1495, 1450, 1404, 1321, 1181, 1127, 1072, 1025, 997, 941, 913, 810, 754, 701, 669, 588, 518 cm<sup>-1</sup>.

Anal. Calcd for C<sub>21</sub>H<sub>22</sub>NOP: C, 75.21; H, 6.61; N, 4.18; P, 9.24. Found: C, 75.42; H, 6.56; N, 4.03; P, 9.11.

<sup>5</sup> Weiner, M. A.; Schxartr, P. *Inorg. Chem.* **1975**, *14*, 1714–1716.

#### 4-[Bis[2-(4-chlorophenyl)ethyl]phosphoryl]pyridine (4c).

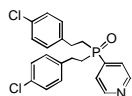

Yield: 194 mg (48%); light-yellow powder, mp 132–133 °C (hexane-MeCN).

$^1\text{H}$  NMR (400.13 MHz,  $\text{CDCl}_3$ ):  $d$  2.14, 2.31 (m, 4H,  $\text{CH}_2\text{P}$ ), 2.69, 2.96 (m, 4H,  $\text{PhCH}_2$ ), 7.04 (d, 4H,  $\text{H}_o$ ,  $^3J_{\text{HH}} = 8.4$  Hz), 7.20 (d, 4H,  $\text{H}_m$ ,  $^3J_{\text{HH}} = 8.4$  Hz), 7.55 (m, 2H,  $\text{H}_{3,5}$ , Py), 8.77 (m, 2H,  $\text{H}_{2,6}$ , Py).

$^{13}\text{C}$  NMR (100.62 MHz,  $\text{CDCl}_3$ ):  $d$  25.2 (d,  $\text{PhCH}_2$ ,  $^2J_{\text{CP}} = 2.2$  Hz), 29.9 (d,  $\text{CH}_2\text{P}$ ,  $^1J_{\text{CP}} = 66.5$  Hz), 122.7 (d,  $\text{C}_{3,5}$ , Py,  $^2J_{\text{CP}} = 6.8$  Hz), 127.2 ( $\text{C}_o$ ), 127.9 ( $\text{C}_m$ ), 130.9 ( $\text{C}_p$ ), 137.1 (d,  $\text{C}_i$ ,  $^3J_{\text{CP}} = 13.3$  Hz), 139.9 (d,  $\text{C}_4$ , Py,  $^1J_{\text{CP}} = 85.3$  Hz), 148.6 (d,  $\text{C}_{2,6}$ , Py,  $^3J_{\text{CP}} = 8.9$  Hz).

$^{15}\text{N}$  NMR (40.56 MHz,  $\text{CDCl}_3$ ):  $d$  -59.6.

$^{31}\text{P}$  NMR (161.98 MHz,  $\text{CDCl}_3$ ):  $d$  37.4.

IR (neat):  $n_{\text{max}} = 3036, 2925, 2862, 1663, 1641, 1587, 1491, 1446, 1405, 1320, 1268, 1209, 1181, 1127, 1093, 1012, 928, 844, 809, 774, 731, 653, 516$   $\text{cm}^{-1}$ .

Anal. Calcd for  $\text{C}_{21}\text{H}_{20}\text{Cl}_2\text{NOP}$ : C, 62.39; H, 4.99; Cl, 17.54; N, 3.46; P, 7.66. Found: C, 62.34; H, 4.85; Cl, 17.87; N, 3.35; P, 7.47.

#### 4-[Bis(2-phenylpropyl)phosphoryl]pyridine (4d).

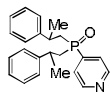

Yield: 200 mg (55%); waxy product. The product is a mixture of three stereoisomers in a ratio of 10:5:3 ( $^1\text{H}$  and  $^{31}\text{P}$  NMR data).

IR (neat):  $n_{\text{max}} = 3056, 3029, 2963, 2927, 2871, 1734, 1713, 1625, 1589, 1492, 1452, 1404, 1317, 1288, 1189, 1123, 1093, 1027, 911, 839, 814, 767, 700, 598, 526$   $\text{cm}^{-1}$ .

Anal. Calcd for  $\text{C}_{23}\text{H}_{26}\text{NOP}$ : C, 76.01; H, 7.21; N, 3.85; P, 8.52. Found: C, 75.85; H, 7.10; N, 3.90; P, 8.37.

##### ***R,R(S,S)*-stereoisomer (major).**

$^1\text{H}$  NMR (400.13 MHz,  $\text{CDCl}_3$ ):  $d$  1.20, 1.23 (d, 6H, Me,  $^3J_{\text{HH}} = 6.9$  Hz,  $^3J_{\text{HH}} = 7.1$  Hz), 1.84, 2.07, 2.15 (m, 4H,  $\text{CH}_2\text{P}$ ), 2.92, 3.38 (m, 2H,  $\text{PhCH}(\text{Me})$ ), 6.78–7.20 (m, 10H, Ph), 7.05 (m, 2H,  $\text{H}_{3,5}$ , Py), 8.50 (m, 2H,  $\text{H}_{2,6}$ , Py).

$^{13}\text{C}$  NMR (100.62 MHz,  $\text{CDCl}_3$ ):  $d$  23.82, 24.09 (2d, Me,  $^3J_{\text{CP}} = 8.7$  Hz,  $^3J_{\text{CP}} = 9.2$  Hz), 33.98, 34.14 (2d,  $\text{PhCH}(\text{Me})$ ,  $^2J_{\text{CP}} = 3.2$  Hz,  $^2J_{\text{CP}} = 3.7$  Hz), 38.66, 39.92 (2d,  $\text{CH}_2\text{P}$ ,  $^1J_{\text{CP}} = 66.3$  Hz,  $^1J_{\text{CP}} = 67.1$  Hz), 124.29 (d,  $\text{C}_{3,5}$ , Py,  $^2J_{\text{CP}} = 7.2$  Hz), 126.56, 126.84 ( $\text{C}_p$ ), 126.69, 126.90 ( $\text{C}_o$ ), 128.30, 128.77 ( $\text{C}_m$ ), 143.51 (d,  $\text{C}_4$ , Py,  $^1J_{\text{CP}} = 84.6$  Hz), 145.32, 146.05 (2d,  $\text{C}_i$ ,  $^3J_{\text{CP}} = 7.5$  Hz,  $^3J_{\text{CP}} = 7.1$  Hz), 149.12 (d,  $\text{C}_{2,6}$ , Py,  $^3J_{\text{CP}} = 9.0$  Hz).

$^{31}\text{P}$  NMR (161.98 MHz,  $\text{CDCl}_3$ ):  $d$  35.3.

### ***R,S(S,R)R<sub>p</sub>*- and *R,S(S,R)S<sub>p</sub>*-stereoisomers:**

**Medium.** <sup>1</sup>H NMR (400.13 MHz, CDCl<sub>3</sub>): *d* 1.10 (d, 6H, Me, <sup>3</sup>J<sub>HH</sub> = 6.9 Hz), 1.95, 2.07 (m, 4H, CH<sub>2</sub>P), 3.17 (m, 2H, PhCH(Me)), 7.45 (m, 2H, H<sub>3,5</sub>, Py), 8.66 (m, 2H, H<sub>2,6</sub>, Py). The signals of the phenyl ring were overlapped with those of other stereoisomers.

<sup>13</sup>C NMR (100.62 MHz, CDCl<sub>3</sub>): *d* 23.54 (d, Me, <sup>3</sup>J<sub>CP</sub> = 7.5 Hz), 34.01 (d, PhCH(Me), <sup>2</sup>J<sub>CP</sub> = 3.9 Hz), 37.91 (d, CH<sub>2</sub>P, <sup>1</sup>J<sub>CP</sub> = 66.6 Hz), 124.11 (d, C<sub>3,5</sub>, Py, <sup>2</sup>J<sub>CP</sub> = 7.6 Hz), 126.68 (C<sub>o</sub>), 126.75 (C<sub>p</sub>), 128.62 (C<sub>m</sub>), 144.85 (d, C<sub>4</sub>, Py, <sup>1</sup>J<sub>CP</sub> = 75.9 Hz), 145.98 (d, C<sub>i</sub>, <sup>3</sup>J<sub>CP</sub> = 9.9 Hz), 149.65 (d, C<sub>2,6</sub>, Py, <sup>3</sup>J<sub>CP</sub> = 9.0 Hz).

<sup>31</sup>P NMR (161.98 MHz, CDCl<sub>3</sub>): *d* 34.4.

**Minor.** <sup>1</sup>H NMR (400.13 MHz, CDCl<sub>3</sub>): *d* 1.33 (d, 6H, Me, <sup>3</sup>J<sub>HH</sub> = 6.9 Hz), 2.07, 2.26 (m, 4H, CH<sub>2</sub>P), 3.05 (m, 2H, PhCH(Me)), 7.03 (m, 2H, H<sub>3,5</sub>, Py), 8.32 (m, 2H, H<sub>2,6</sub>, Py). The signals of the phenyl ring were overlapped with those of other stereoisomers.

<sup>13</sup>C NMR (100.62 MHz, CDCl<sub>3</sub>): *d* 24.02 (d, Me, <sup>3</sup>J<sub>CP</sub> = 8.9 Hz), 34.06 (d, PhCH(Me), <sup>2</sup>J<sub>CP</sub> = 3.9 Hz), 39.41 (d, CH<sub>2</sub>P, <sup>1</sup>J<sub>CP</sub> = 67.3 Hz), 124.57 (d, C<sub>3,5</sub>, Py, <sup>2</sup>J<sub>CP</sub> = 6.8 Hz), 126.64 (C<sub>p</sub>), 126.75 (C<sub>o</sub>), 128.36 (C<sub>m</sub>), 142.30 (d, C<sub>4</sub>, Py, <sup>1</sup>J<sub>CP</sub> = 85.1 Hz), 145.24 (d, C<sub>i</sub>, <sup>3</sup>J<sub>CP</sub> = 7.1 Hz), 148.44 (d, C<sub>2,6</sub>, Py, <sup>3</sup>J<sub>CP</sub> = 8.5 Hz).

<sup>31</sup>P NMR (161.98 MHz, CDCl<sub>3</sub>): *d* 35.9.

### **4-(Diphenylphosphorothioyl)pyridine (4e).<sup>6</sup>**

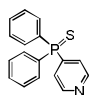

Yield: 133 mg (45%); beige powder, mp 127–128 °C (reprecipitated from CCl<sub>4</sub> to hexane).

<sup>1</sup>H NMR (400.13 MHz, CDCl<sub>3</sub>): *d* 7.60 (m, 12H, Ph; H<sub>3,5</sub>, Py), 8.72 (m, 2H, H<sub>2,6</sub>, Py).

<sup>13</sup>C NMR (100.62 MHz, CDCl<sub>3</sub>): *d* 125.9 (d, C<sub>3,5</sub>, Py, <sup>2</sup>J<sub>CP</sub> = 7.8 Hz), 128.9 (d, C<sub>m</sub>, <sup>3</sup>J<sub>CP</sub> = 12.7 Hz), 131.3 (d, C<sub>i</sub>, <sup>1</sup>J<sub>CP</sub> = 86.0 Hz), 132.2 (C<sub>p</sub>), 132.3 (d, C<sub>o</sub>, <sup>2</sup>J<sub>CP</sub> = 10.8 Hz), 143.4 (d, C<sub>4</sub>, Py, <sup>1</sup>J<sub>CP</sub> = 78.3 Hz), 149.9 (d, C<sub>2,6</sub>, Py, <sup>3</sup>J<sub>CP</sub> = 9.5 Hz).

<sup>15</sup>N NMR (40.56 MHz, CDCl<sub>3</sub>): *d* -59.7.

<sup>31</sup>P NMR (161.98 MHz, CDCl<sub>3</sub>): *d* 42.8.

IR (neat): *n*<sub>max</sub> = 3054, 2955, 2925, 2857, 1677, 1578, 1541, 1480, 1436, 1401, 1313, 1183, 1107, 1074, 1026, 995, 913, 810, 720, 696, 641, 519 cm<sup>-1</sup>.

Anal. Calcd for C<sub>17</sub>H<sub>14</sub>NPS: C, 69.13; H, 4.78; N, 4.74; P, 10.49; S, 10.86. Found: C, 69.24; H, 4.65; N, 4.69; P, 10.37; S, 10.72.

### **4-[Bis(2-phenylethyl)phosphorothioyl]pyridine (4f).**

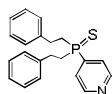

<sup>6</sup> Burns, M. J.; Rayner, P. J.; Green, G. G. R.; Highton, L. A. R.; Mewis, R. E.; Duckett, S. B. *J. Phys. Chem. B* **2015**, *119*, 5020–5027.

Yield: 250 mg (71%); brown powder, mp 83–84 °C (reprecipitated from CCl<sub>4</sub> to hexane).

<sup>1</sup>H NMR (400.13 MHz, CDCl<sub>3</sub>): *d* 2.38 (m, 4H, CH<sub>2</sub>P), 2.68, 3.02 (m, 4H, PhCH<sub>2</sub>), 7.09 (m, 4H, H<sub>o</sub>), 7.16 (m, 2H, H<sub>p</sub>), 7.21 (m, 4H, H<sub>m</sub>), 7.69 (m, 2H, H<sub>3,5</sub>, Py), 8.72 (br s, 2H, H<sub>2,6</sub>, Py).

<sup>13</sup>C NMR (100.62 MHz, CDCl<sub>3</sub>): *d* 28.3 (d, PhCH<sub>2</sub>, <sup>2</sup>J<sub>CP</sub> = 1.9 Hz), 34.4 (d, CH<sub>2</sub>P, <sup>1</sup>J<sub>CP</sub> = 51.6 Hz), 124.8 (d, C<sub>3,5</sub>, Py, <sup>2</sup>J<sub>CP</sub> = 7.1 Hz), 126.7 (C<sub>p</sub>), 128.3 (C<sub>o</sub>), 128.7 (C<sub>m</sub>), 140.1 (d, C<sub>i</sub>, <sup>3</sup>J<sub>CP</sub> = 14.5 Hz), 140.7 (d, C<sub>4</sub>, Py, <sup>1</sup>J<sub>CP</sub> = 66.7 Hz), 150.1 (d, C<sub>2,6</sub>, Py, <sup>3</sup>J<sub>CP</sub> = 8.7 Hz).

<sup>15</sup>N NMR (40.56 MHz, CDCl<sub>3</sub>): *d* -59.5.

<sup>31</sup>P NMR (161.98 MHz, CDCl<sub>3</sub>): *d* 45.8.

IR (neat): *n*<sub>max</sub> = 3057, 3028, 2931, 2862, 1640, 1582, 1541, 1494, 1449, 1402, 1317, 1216, 1121, 1074, 1006, 946, 912, 808, 758, 700, 610, 560, 507 cm<sup>-1</sup>.

Anal. Calcd for C<sub>21</sub>H<sub>22</sub>NPS: C, 71.77; H, 6.31; N, 3.99; P, 8.81; S, 9.12. Found: C, 71.70; H, 6.42; N, 3.87; P, 8.58; S, 8.93.

#### 4-[Bis[2-(4-chlorophenyl)ethyl]phosphorothioyl]pyridine (4g).

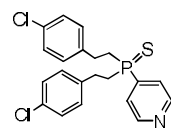

Yield: 168 mg (40%); light-yellow powder, mp 101–102 °C (hexane-MeCN).

<sup>1</sup>H NMR (400.13 MHz, CDCl<sub>3</sub>): *d* 2.28 (m, 4H, CH<sub>2</sub>P), 2.59, 2.95 (m, 4H, PhCH<sub>2</sub>), 6.97 (d, 4H, H<sub>o</sub>, <sup>3</sup>J<sub>HH</sub> = 8.1 Hz), 7.13 (d, 4H, H<sub>m</sub>, <sup>3</sup>J<sub>HH</sub> = 8.1 Hz), 7.63 (m, 2H, H<sub>3,5</sub>, Py), 8.69 (m, 2H, H<sub>2,6</sub>, Py).

<sup>13</sup>C NMR (100.62 MHz, CDCl<sub>3</sub>): *d* 27.6 (d, PhCH<sub>2</sub>, <sup>2</sup>J<sub>CP</sub> = 2.0 Hz), 34.2 (d, CH<sub>2</sub>P, <sup>1</sup>J<sub>CP</sub> = 51.9 Hz), 124.6 (d, C<sub>3,5</sub>, Py, <sup>2</sup>J<sub>CP</sub> = 7.6 Hz), 128.7 (C<sub>o</sub>), 129.6 (C<sub>m</sub>), 132.4 (C<sub>p</sub>), 138.4 (d, C<sub>i</sub>, <sup>3</sup>J<sub>CP</sub> = 14.4 Hz), 140.4 (d, C<sub>4</sub>, Py, <sup>1</sup>J<sub>CP</sub> = 67.1 Hz), 150.0 (d, C<sub>2,6</sub>, Py, <sup>3</sup>J<sub>CP</sub> = 9.2 Hz).

<sup>15</sup>N NMR (40.56 MHz, CDCl<sub>3</sub>): *d* -60.4.

<sup>31</sup>P NMR (161.98 MHz, CDCl<sub>3</sub>): *d* 45.5.

IR (neat): *n*<sub>max</sub> = 3047, 2913, 2854, 1655, 1581, 1542, 1489, 1438, 1403, 1316, 1215, 1120, 1089, 1011, 970, 912, 807, 777, 747, 654, 597, 517 cm<sup>-1</sup>.

Anal. Calcd for C<sub>21</sub>H<sub>20</sub>Cl<sub>2</sub>NPS: C, 60.01; H, 4.80; Cl, 16.87; N, 3.33; P, 7.37; S, 7.63. Found: C, 59.80; H, 4.85; Cl, 16.69; N, 3.25; P, 7.24; S, 7.48.

#### 4-[Bis(2-phenylpropyl)phosphorothioyl]pyridine (4h).

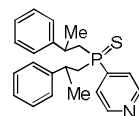

Yield: 220 mg (58%); light-yellow powder, mp 103–104 °C (hexane). The product is a mixture of three stereoisomers in a ratio of 3.2:1.6:1 (<sup>1</sup>H and <sup>31</sup>P NMR data).

IR (neat):  $n_{\max}$  = 3058, 3026, 2964, 2925, 2874, 1659, 1622, 1583, 1539, 1491, 1452, 1402, 1313, 1219, 1114, 1087, 1017, 913, 848, 801, 763, 702, 610, 515  $\text{cm}^{-1}$ .

Anal. Calcd for  $\text{C}_{23}\text{H}_{26}\text{NPS}$ : C, 72.79; H, 6.91; N, 3.69; P, 8.16; S, 8.45. Found: C, 72.71; H, 6.81; N, 3.73; P, 8.03; S, 8.63.

***R,R(S,S)*-stereoisomer (major).**

$^1\text{H}$  NMR (400.13 MHz,  $\text{CDCl}_3$ ):  $\delta$  1.12, 1.15 (d, 6H, Me,  $^3J_{\text{HH}} = 7.0$  Hz), 1.56, 2.07, 2.12, 2.37 (m, 4H,  $\text{CH}_2\text{P}$ ), 3.11, 3.56 (m, 2H,  $\text{PhCH}(\text{Me})$ ), 6.89 (m, 6H,  $\text{H}_m, \text{H}_p$ ), 7.31 (m, 4H,  $\text{H}_o$ ), 7.36 (dd, 2H,  $\text{H}_{3,5}$ , Py,  $^3J_{\text{PH}} = 12.3$  Hz,  $^3J_{3(5)-2(6)} = 5.0$  Hz), 8.42 (m, 2H,  $\text{H}_{2,6}$ , Py).

$^{13}\text{C}$  NMR (100.62 MHz,  $\text{CDCl}_3$ ):  $\delta$  23.49, 24.40 (2d, Me,  $^3J_{\text{CP}} = 10.4$  Hz,  $^3J_{\text{CP}} = 11.5$  Hz), 34.31, 34.59 (2d,  $\text{PhCH}(\text{Me})$ ,  $^2J_{\text{CP}} = 1.0$  Hz,  $^2J_{\text{CP}} = 2.0$  Hz), 39.92, 42.29 (2d,  $\text{CH}_2\text{P}$ ,  $^1J_{\text{CP}} = 51.5$  Hz,  $^1J_{\text{CP}} = 41.1$  Hz), 124.45 (d,  $\text{C}_{3,5}$ , Py,  $^2J_{\text{CP}} = 6.8$  Hz), 126.47, 128.83 ( $\text{C}_p$ ), 127.19, 127.04 ( $\text{C}_o$ ), 128.03, 128.73 ( $\text{C}_m$ ), 141.89 (d,  $\text{C}_4$ , Py,  $^1J_{\text{CP}} = 67.0$  Hz), 144.33, 145.98 (2d,  $\text{C}_i$ ,  $^3J_{\text{CP}} = 7.0$  Hz,  $^3J_{\text{CP}} = 4.0$  Hz), 149.12 (d,  $\text{C}_{2,6}$ , Py,  $^3J_{\text{CP}} = 8.8$  Hz).

$^{15}\text{N}$  NMR (40.56 MHz,  $\text{CDCl}_3$ ):  $\delta$  -62.0.

$^{31}\text{P}$  NMR (161.98 MHz,  $\text{CDCl}_3$ ):  $\delta$  44.1.

***R,S(S,R)R<sub>p</sub>- and R,S(S,R)S<sub>p</sub>*-stereoisomers:**

**Medium.**  $^1\text{H}$  NMR (400.13 MHz,  $\text{CDCl}_3$ ):  $\delta$  1.35 (d, 6H, Me,  $^3J_{\text{HH}} = 7.0$  Hz), 2.34, 2.49 (m, 4H,  $\text{CH}_2\text{P}$ ), 3.25 (m, 2H,  $\text{PhCH}(\text{Me})$ ), 7.05 (dd, 2H,  $\text{H}_{3,5}$ , Py,  $^3J_{\text{PH}} = 12.4$  Hz,  $^3J_{3(5)-2(6)} = 5.0$  Hz), 8.17 (m, 2H,  $\text{H}_{2,6}$ , Py). The signals of the phenyl ring were overlapped with those of other stereoisomers.

$^{13}\text{C}$  NMR (100.62 MHz,  $\text{CDCl}_3$ ):  $\delta$  24.40 (d, Me,  $^3J_{\text{CP}} = 11.5$  Hz), 34.37 (d,  $\text{PhCH}(\text{Me})$ ,  $^2J_{\text{CP}} = 2.0$  Hz), 41.76 (d,  $\text{CH}_2\text{P}$ ,  $^1J_{\text{CP}} = 41.5$  Hz), 124.71 (d,  $\text{C}_{3,5}$ , Py,  $^2J_{\text{CP}} = 7.6$  Hz), 126.52 ( $\text{C}_p$ ), 127.01 ( $\text{C}_o$ ), 128.11 ( $\text{C}_m$ ), 139.95 (d,  $\text{C}_4$ , Py,  $^1J_{\text{CP}} = 67.1$  Hz), 144.50 (d,  $\text{C}_i$ ,  $^3J_{\text{CP}} = 5.0$  Hz), 148.46 (d,  $\text{C}_{2,6}$ , Py,  $^3J_{\text{CP}} = 9.2$  Hz).

$^{31}\text{P}$  NMR (161.98 MHz,  $\text{CDCl}_3$ ):  $\delta$  43.9.

**Minor.**  $^1\text{H}$  NMR (400.13 MHz,  $\text{CDCl}_3$ ):  $\delta$  0.99 (d, 6H, Me,  $^3J_{\text{HH}} = 7.0$  Hz), 2.15, 2.48 (m, 4H,  $\text{CH}_2\text{P}$ ), 3.27 (m, 2H,  $\text{PhCH}(\text{Me})$ ), 6.79 (m, 6H,  $\text{H}_m, \text{H}_p$ ), 7.24 (m, 4H,  $\text{H}_o$ ), 7.73 (dd, 2H,  $\text{H}_{3,5}$ , Py,  $^3J_{\text{PH}} = 12.5$  Hz,  $^3J_{3(5)-2(6)} = 5.0$  Hz), 8.71 (m, 2H,  $\text{H}_{2,6}$ , Py).

$^{13}\text{C}$  NMR (100.62 MHz,  $\text{CDCl}_3$ ):  $\delta$  22.95 (d, Me,  $^3J_{\text{CP}} = 8.4$  Hz), 34.43 (d,  $\text{PhCH}(\text{Me})$ ,  $^2J_{\text{CP}} = 1.6$  Hz), 40.79 (d,  $\text{CH}_2\text{P}$ ,  $^1J_{\text{CP}} = 50.3$  Hz), 124.45 (d,  $\text{C}_{3,5}$ , Py,  $^2J_{\text{CP}} = 6.8$  Hz), 126.59 ( $\text{C}_p$ ), 126.86 ( $\text{C}_o$ ), 128.51 ( $\text{C}_m$ ), 143.75 (d,  $\text{C}_4$ , Py,  $^1J_{\text{CP}} = 65.5$  Hz), 145.76 (d,  $\text{C}_i$ ,  $^3J_{\text{CP}} = 10.0$  Hz), 149.84 (d,  $\text{C}_{2,6}$ , Py,  $^3J_{\text{CP}} = 8.8$  Hz).

$^{31}\text{P}$  NMR (161.98 MHz,  $\text{CDCl}_3$ ):  $\delta$  43.7.

**4-[Bis(2-phenylethyl)phosphoroselenoyl]pyridine (4i).**

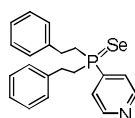

Yield: 159 mg (40%); light-yellow powder, mp 85–86 °C (reprecipitated from  $\text{CCl}_4$  to hexane).



$^1\text{H}$  NMR (400.13 MHz,  $\text{CDCl}_3$ ):  $d$  2.50 (m, 4H,  $\text{CH}_2\text{P}$ ), 2.68, 3.03 (m, 4H,  $\text{PhCH}_2$ ), 7.09 (m, 4H,  $\text{H}_o$ ), 7.15 (m, 2H,  $\text{H}_p$ ), 7.22 (m, 4H,  $\text{H}_m$ ), 7.73 (m, 2H,  $\text{H}_{3,5}$ , Py), 8.71 (br s, 2H,  $\text{H}_{2,6}$ , Py).

$^{13}\text{C}$  NMR (100.62 MHz,  $\text{CDCl}_3$ ):  $d$  28.9 (d,  $\text{PhCH}_2$ ,  $^2J_{\text{CP}} = 1.9$  Hz), 33.9 (d,  $\text{CH}_2\text{P}$ ,  $^1J_{\text{CP}} = 44.5$  Hz), 125.2 (d,  $\text{C}_{3,5}$ , Py,  $^2J_{\text{CP}} = 7.6$  Hz), 126.5 ( $\text{C}_p$ ), 128.1 ( $\text{C}_o$ ), 128.5 ( $\text{C}_m$ ), 138.9 (d,  $\text{C}_4$ , Py,  $^1J_{\text{CP}} = 59.1$  Hz), 139.7 (d,  $\text{C}_i$ ,  $^3J_{\text{CP}} = 14.8$  Hz), 149.9 (d,  $\text{C}_{2,6}$ , Py,  $^3J_{\text{CP}} = 8.8$  Hz).

$^{15}\text{N}$  NMR (40.56 MHz,  $\text{CDCl}_3$ ):  $d$  -58.1.

$^{31}\text{P}$  NMR (161.98 MHz,  $\text{CDCl}_3$ ):  $d$  37.4 (+d-satellites,  $^1J_{\text{PSe}} = 740.7$  Hz).

$^{77}\text{Se}$  NMR (76.31 MHz,  $\text{CDCl}_3$ ):  $d$  -421.5 (d,  $^1J_{\text{PSe}} = 740.7$  Hz).

IR (neat):  $n_{\text{max}} = 3056, 3028, 2928, 28606, 1596, 1579, 1489, 1494, 1449, 1402, 1316, 1216, 1118, 1073, 1021, 1000, 945, 911, 854, 808, 753, 701, 576, 506, 482$   $\text{cm}^{-1}$ .

Anal. Calcd for  $\text{C}_{21}\text{H}_{22}\text{NPSe}$ : C, 63.32; H, 5.57; N, 3.52; P, 7.78; Se, 19.82. Found: C, 63.26; H, 5.48; N, 3.47; P, 7.66; Se, 19.63.

#### 4-[Bis(2-phenylpropyl)phosphoroselenoyl]pyridine (4j).

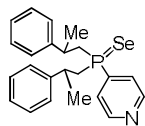

Yield: 158 mg (37%); light-yellow powder, mp 82–83°C (hexane). The product is a mixture of three stereoisomers in a ratio of 10.8:8.3:1 ( $^1\text{H}$  and  $^{31}\text{P}$  NMR data).

IR (neat):  $n_{\text{max}} = 3056, 3029, 2962, 2925, 2873, 1658, 1626, 1602, 1579, 1536, 1491, 1452, 1402, 1314, 1219, 1161, 1111, 1085, 1016, 913, 847, 805, 761, 700, 535, 505, 457$   $\text{cm}^{-1}$ .

Anal. Calcd for  $\text{C}_{23}\text{H}_{26}\text{NPSe}$ : C, 64.79; H, 6.15; N, 3.28; P, 7.26; Se, 18.52. Found: C, 64.70; H, 6.12; N, 3.22; P, 7.02; Se, 18.33.

#### ***R,R(S,S)*-stereoisomer (major).**

$^1\text{H}$  NMR (400.13 MHz,  $\text{CDCl}_3$ ):  $d$  1.00, 1.09 (d, 6H, Me,  $^3J_{\text{HH}} = 7.0$  Hz), 1.56, 2.29, 2.27, 2.62 (m, 4H,  $\text{CH}_2\text{P}$ ), 3.10, 3.56 (m, 2H,  $\text{PhCH}(\text{Me})$ ), 6.86, 7.29 (m, 4H,  $\text{H}_m$ ), 6.85, 7.30 (m, 6H,  $\text{H}_o$ ,  $\text{H}_p$ ), 7.35 (m, 2H,  $\text{H}_{3,5}$ , Py), 8.37 (br s, 2H,  $\text{H}_{2,6}$ , Py).

$^{13}\text{C}$  NMR (100.62 MHz,  $\text{CDCl}_3$ ):  $d$  23.39, 24.42 (2d, Me,  $^3J_{\text{CP}} = 10.6$  Hz,  $^3J_{\text{CP}} = 14.7$  Hz), 34.98, 35.44 (2d,  $\text{PhCH}(\text{Me})$ ,  $^2J_{\text{CP}} = 2.3$  Hz,  $^2J_{\text{CP}} = 1.5$  Hz), 39.34, 41.69 (2d,  $\text{CH}_2\text{P}$ ,  $^1J_{\text{CP}} = 44.7$  Hz), 125.18 (br s,  $\text{C}_{3,5}$ , Py), 126.52, 126.88 ( $\text{C}_p$ ), 127.13, 127.27 ( $\text{C}_o$ ), 128.03, 128.73 ( $\text{C}_m$ ), 139.93 (d,  $\text{C}_4$ , Py,  $^1J_{\text{CP}} = 59.7$  Hz), 143.95, 145.74 (2d,  $\text{C}_i$ ,  $^3J_{\text{CP}} = 4.2$  Hz,  $^3J_{\text{CP}} = 7.3$  Hz), 149.18 ( $\text{C}_{2,6}$ , Py).

$^{31}\text{P}$  NMR (161.98 MHz,  $\text{CDCl}_3$ ):  $d$  36.8 (+d-satellites,  $^1J_{\text{PSe}} = 738.7$  Hz).

$^{77}\text{Se}$  NMR (76.31 MHz,  $\text{CDCl}_3$ ):  $d$  -430.7 (d,  $^1J_{\text{PSe}} = 738.7$  Hz).

#### ***R,S(S,R)R<sub>p</sub>*- and *R,S(S,R)S<sub>p</sub>*-stereoisomers:**

**Medium.**  $^1\text{H}$  NMR (400.13 MHz,  $\text{CDCl}_3$ ):  $d$  1.31 (d, 6H, Me,  $^3J_{\text{HH}} = 7.0$  Hz), 2.25, 2.62 (m, 4H,  $\text{CH}_2\text{P}$ ), 3.30 (m, 2H,  $\text{PhCH}(\text{Me})$ ), 6.83 (m, 4H,  $\text{H}_m$ ), 6.85 (m, 2H,  $\text{H}_p$ ), 6.95 (m, 4H,  $\text{H}_o$ ), 7.00 (m, 2H,  $\text{H}_{3,5}$ , Py), 8.10 (br s, 2H,  $\text{H}_{2,6}$ , Py).

$^{13}\text{C}$  NMR (100.62 MHz,  $\text{CDCl}_3$ ):  $d$  24.41 (d, Me,  $^3J_{\text{CP}} = 12.6$  Hz), 35.06 (d,  $\text{PhCH}(\text{Me})$ ,  $^2J_{\text{CP}} = 2.2$  Hz), 41.34 (d,  $\text{CH}_2\text{P}$ ,  $^1J_{\text{CP}} = 45.9$  Hz), 125.33 ( $\text{C}_{3,5}$ , Py), 126.57 ( $\text{C}_p$ ), 127.09 ( $\text{C}_o$ ), 128.09 ( $\text{C}_m$ ), 137.91 (d,  $\text{C}_4$ , Py,  $^1J_{\text{CP}} = 58.5$  Hz), 144.15 (d,  $\text{C}_i$ ,  $^3J_{\text{CP}} = 7.3$  Hz), 148.44 ( $\text{C}_{2,6}$ , Py).

$^{31}\text{P}$  NMR (161.98 MHz,  $\text{CDCl}_3$ ):  $d$  36.1 (+d-satellites,  $^1J_{\text{PSe}} = 738.7$  Hz).

$^{77}\text{Se}$  NMR (76.31 MHz,  $\text{CDCl}_3$ ):  $d$  -421.3 (d,  $^1J_{\text{PSe}} = 738.7$  Hz).

**Minor.**  $^1\text{H}$  NMR (400.13 MHz,  $\text{CDCl}_3$ ):  $d$  0.91 (d, 6H, Me,  $^3J_{\text{HH}} = 7.0$  Hz), 2.16, 2.47 (m, 4H,  $\text{CH}_2\text{P}$ ), 3.29 (m, 2H,  $\text{PhCH}(\text{Me})$ ), 8.65 (br s, 2H,  $\text{H}_{2,6}$ , Py). The signals of the phenyl and pyridine ( $\text{H}_{3,5}$ ) rings were overlapped with those of other stereoisomers.

$^{13}\text{C}$  NMR (100.62 MHz,  $\text{CDCl}_3$ ):  $d$  22.85 (d, Me,  $^3J_{\text{CP}} = 9.1$  Hz), 35.30 (d,  $\text{PhCH}(\text{Me})$ ,  $^2J_{\text{CP}} = 2.1$  Hz), 40.16 (d,  $\text{CH}_2\text{P}$ ,  $^1J_{\text{CP}} = 42.8$  Hz), 125.33 ( $\text{C}_{3,5}$ , Py), 126.64 ( $\text{C}_p$ ), 126.90 ( $\text{C}_o$ ), 128.51 ( $\text{C}_m$ ), 142.15 (d,  $\text{C}_4$ , Py,  $^1J_{\text{CP}} = 57.1$  Hz), 145.70 (d,  $\text{C}_i$ ,  $^3J_{\text{CP}} = 9.2$  Hz), 149.18 ( $\text{C}_{2,6}$ , Py).

$^{31}\text{P}$  NMR (161.98 MHz,  $\text{CDCl}_3$ ):  $d$  36.3 (+d-satellites,  $^1J_{\text{PSe}} = 736.8$  Hz).

$^{77}\text{Se}$  NMR (76.31 MHz,  $\text{CDCl}_3$ ):  $d$  -421.4 (d,  $^1J_{\text{PSe}} = 736.8$  Hz).

#### (3E)-4-Phenylbut-3-en-2-one (5a).<sup>7</sup>

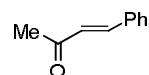

$^1\text{H}$  NMR (400.13 MHz,  $\text{CDCl}_3$ ):  $d$  2.37 (s, 3H, Me), 6.71 (d, 1H,  $\text{PhCH}=\text{C}$ ,  $^3J_{\text{HH}} = 16.3$  Hz), 7.38, 7.53 (m, 5H, Ph), 7.50 (d, 1H,  $=\text{CH}(\text{C}=\text{O})$ ,  $^3J_{\text{HH}} = 16.3$  Hz).

#### (1E)-1-Phenylpent-1-en-3-one (5b).<sup>8</sup>

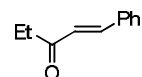

$^1\text{H}$  NMR (400.13 MHz,  $\text{CDCl}_3$ ):  $d$  1.18 (t, 1H, Me,  $^3J_{\text{HH}} = 7.1$  Hz), 2.71 (q, 1H,  $\text{CH}_2\text{Me}$ ,  $^3J_{\text{HH}} = 7.1$  Hz), 6.73 (d, 1H,  $\text{PhCH}=\text{C}$ ,  $^3J_{\text{HH}} = 16.3$  Hz), 7.37, 7.57 (m, 5H, Ph; 1H,  $=\text{CH}(\text{C}=\text{O})$ ).

#### (2E)-1,3-Diphenylprop-2-en-1-one (5c).<sup>9</sup>

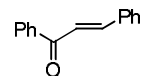

Yield: 73 mg (35%); white powder, mp 78–79 °C (hexane).

<sup>7</sup> Gottumukkala, A. L.; Teichert, J. F.; Heijnen, D.; Eisink, N.; van Dijk, S.; Ferrer, C.; van den Hoogenband, A.; Minnaard, A. *J. J. Org. Chem.* **2011**, *76*, 3498–3501.

<sup>8</sup> Li, X.; Li, L.; Tang, Y.; Zhong, L.; Cun, L.; Zhu, J.; Liao, J.; Deng, J. *J. Org. Chem.* **2010**, *75*, 2981–2988.

<sup>9</sup> Arbutova, S. N.; Glotova, T. E.; Dvorko, M. Yu.; Ushakov, I. A.; Gusarova, N. K.; Trofimov, B. A. *Arkivoc* **2011**, *xi*, 183–188.

$^1\text{H}$  NMR (400.13 MHz,  $\text{CDCl}_3$ ): *d* 7.40, 7.49, 7.56, 7.63 (m, 5H,  $\text{H}_o$ ,  $\text{H}_m$ ,  $\text{H}_p$ ,  $\text{PhCH=}$ ; 3H,  $\text{H}_m$ ,  $\text{H}_p$ ,  $\text{PhC=O}$ ; 1H,  $=\text{CH}(\text{C=O})$ ), 7.80 (d, 1H,  $\text{PhCH=}$ ,  $^3J_{\text{HH}} = 15.7$  Hz), 8.01 (d, 2H,  $\text{H}_o$ ,  $\text{PhC=O}$ ,  $^3J_{\text{HH}} = 7.2$  Hz).  
 $^{13}\text{C}$  NMR (100.62 MHz,  $\text{CDCl}_3$ ): *d* 122.1 ( $=\text{CH}(\text{C=O})$ ), 128.3 ( $\text{C}_o$ ,  $\text{PhCH=}$ ), 128.4 ( $\text{C}_o$ ,  $\text{PhC=O}$ ), 128.6 ( $\text{C}_m$ ,  $\text{PhCH=}$ ), 128.9 ( $\text{C}_m$ ,  $\text{PhC=O}$ ), 130.5 ( $\text{C}_p$ ,  $\text{PhCH=}$ ), 132.7 ( $\text{C}_p$ ,  $\text{PhC=O}$ ), 134.9 ( $\text{C}_i$ ,  $\text{PhC=O}$ ), 138.2 ( $\text{C}_i$ ,  $\text{PhCH=}$ ), 144.7 ( $\text{PhCH=}$ ), 190.4 ( $\text{C=O}$ ).

Anal. Calcd for  $\text{C}_{15}\text{H}_{12}\text{O}$ : C, 86.51; H, 5.81. Found: C, 86.39; H, 5.76.

#### (2E)-1-(Furan-2-yl)-3-phenylprop-2-en-1-one (5d).<sup>9</sup>

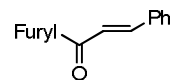

Yield: 89 mg (45%); beige powder, mp 79–80 °C (hexane).

$^1\text{H}$  NMR (400.13 MHz,  $\text{CDCl}_3$ ): *d* 6.58, 7.31, 7.40, 7.63 (m, 8H, Ph, Furyl), 7.44 (d, 1H,  $=\text{CH}(\text{C=O})$ ,  $^3J_{\text{HH}} = 15.8$  Hz), 7.87 (d, 1H,  $\text{PhCH=}$ ,  $^3J_{\text{HH}} = 15.8$  Hz).

$^{13}\text{C}$  NMR (100.62 MHz,  $\text{CDCl}_3$ ): *d* 112.5 ( $\text{C}_4$ , Furyl), 117.4 ( $\text{C}_3$ , Furyl), 121.2 ( $=\text{CH}(\text{C=O})$ ), 128.5 ( $\text{C}_m$ ,  $\text{PhCH=}$ ), 128.9 ( $\text{C}_o$ ,  $\text{PhCH=}$ ), 130.6 ( $\text{C}_p$ ,  $\text{PhCH=}$ ), 134.7 ( $\text{C}_i$ ,  $\text{PhCH=}$ ), 143.9 ( $\text{PhCH=}$ ), 146.5 ( $\text{C}_5$ , Furyl), 153.7 ( $\text{C}_2$ , Furyl), 178.0 ( $\text{C=O}$ ).

Anal. Calcd for  $\text{C}_{13}\text{H}_{10}\text{O}_2$ : C, 78.77; H, 5.09. Found: C 78.66; H 5.14.

#### 4-(Diphenylphosphoryl)-3-methylpyridine (6a).

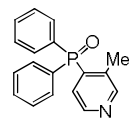

Yield: 123 mg (42%); waxy product.

$^1\text{H}$  NMR (400.13 MHz,  $\text{CDCl}_3$ ): *d* 2.38 (s, 3H, Me- $\text{C}_3$ ), 6.85 (dd, 1H,  $\text{H}_5$ , Py,  $^3J_{\text{PH}} = 13.4$  Hz,  $^3J_{5-6} = 4.7$  Hz), 7.46, 7.57 (m, 10H, Ph), 8.40 (br t, 1H,  $\text{H}_6$ , Py,  $^4J_{\text{PH}} = 5.1$  Hz,  $^3J_{5-6} = 4.7$  Hz), 8.50 (d, 1H,  $\text{H}_2$ , Py,  $^4J_{\text{PH}} = 4.5$  Hz).

$^{13}\text{C}$  NMR (100.62 MHz,  $\text{CDCl}_3$ ): *d* 18.3 (d, Me- $\text{C}_3$ ,  $^3J_{\text{CP}} = 4.8$  Hz), 126.0 (d,  $\text{C}_5$ , Py,  $^2J_{\text{CP}} = 10.8$  Hz), 128.7 (d,  $\text{C}_m$ ,  $^3J_{\text{CP}} = 12.4$  Hz), 131.0 (d,  $\text{C}_i$ ,  $^1J_{\text{CP}} = 104.6$  Hz), 131.7 (d,  $\text{C}_o$ ,  $^2J_{\text{CP}} = 9.9$  Hz), 132.3 ( $\text{C}_p$ ), 136.9 (d,  $\text{C}_3$ , Py,  $^2J_{\text{CP}} = 4.8$  Hz), 139.7 (d,  $\text{C}_4$ , Py,  $^1J_{\text{CP}} = 95.6$  Hz), 147.0 (d,  $\text{C}_6$ , Py,  $^3J_{\text{CP}} = 10.4$  Hz), 152.3 (d,  $\text{C}_2$ , Py,  $^3J_{\text{CP}} = 8.4$  Hz).

$^{15}\text{N}$  NMR (40.56 MHz,  $\text{CDCl}_3$ ): *d* -59.9.

$^{31}\text{P}$  NMR (161.98 MHz,  $\text{CDCl}_3$ ): *d* 30.5.

IR (neat):  $\nu_{\text{max}} = 3055, 2957, 2923, 2855, 1627, 1582, 1476, 1438, 1398, 1298, 1195, 1115, 1068, 1031, 923, 830, 718, 547$   $\text{cm}^{-1}$ .

Anal. Calcd for  $\text{C}_{18}\text{H}_{16}\text{NOP}$ : C, 73.71; H, 5.50; N, 4.78; P, 10.56. Found: C, 73.58; H, 5.41; N, 4.69; P, 10.34.

#### 4-[Bis(2-phenylethyl)phosphoryl]-3-methylpyridine (6b).

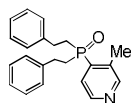

Yield: 223 mg (64%); waxy product.

$^1\text{H}$  NMR (400.13 MHz,  $\text{CDCl}_3$ ):  $\delta$  2.30 (m, 4H,  $\text{CH}_2\text{P}$ ), 2.56 (3H, Me- $\text{C}_3$ ), 2.74, 2.98 (m, 4H,  $\text{PhCH}_2$ ), 7.10 (m, 4H,  $\text{H}_o$ ), 7.17 (m, 2H,  $\text{H}_p$ ), 7.23 (m, 4H,  $\text{H}_m$ ), 7.57 (dd, 1H,  $\text{H}_5$ , Py,  $^3J_{\text{PH}} = 11.9$  Hz,  $^3J_{5-6} = 5.0$  Hz), 8.49 (d, 1H,  $\text{H}_2$ , Py,  $^4J_{\text{PH}} = 4.8$  Hz) 8.56 (br t, 1H,  $\text{H}_6$ , Py,  $^4J_{\text{PH}} = 4.8$  Hz,  $^3J_{5-6} = 5.0$  Hz).

$^{13}\text{C}$  NMR (100.62 MHz,  $\text{CDCl}_3$ ):  $\delta$  18.6 (Me- $\text{C}_3$ ), 27.6 (d,  $\text{PhCH}_2$ ,  $^2J_{\text{CP}} = 2.8$  Hz), 31.8 (d,  $\text{CH}_2\text{P}$ ,  $^1J_{\text{CP}} = 65.5$  Hz), 125.5 (d,  $\text{C}_5$ , Py,  $^2J_{\text{CP}} = 7.8$  Hz), 126.7 ( $\text{C}_p$ ), 128.1 ( $\text{C}_o$ ), 128.7 ( $\text{C}_m$ ), 135.1 (d,  $\text{C}_3$ , Py,  $^2J_{\text{CP}} = 6.4$  Hz), 139.7 (d,  $\text{C}_4$ , Py,  $^1J_{\text{CP}} = 81.5$  Hz), 140.4 (d,  $\text{C}_i$ ,  $^3J_{\text{CP}} = 13.6$  Hz), 147.1 (d,  $\text{C}_6$ , Py,  $^3J_{\text{CP}} = 8.8$  Hz), 152.0 (d,  $\text{C}_2$ , Py,  $^3J_{\text{CP}} = 8.4$  Hz).

$^{15}\text{N}$  NMR (40.56 MHz,  $\text{CDCl}_3$ ):  $\delta$  -64.8.

$^{31}\text{P}$  NMR (161.98 MHz,  $\text{CDCl}_3$ ):  $\delta$  39.8.

IR (neat):  $\nu_{\text{max}} = 3027, 2926, 2856, 1739, 1649, 1530, 1496, 1449, 1400, 1294, 1178, 1094, 1078, 1036, 940, 834, 751, 702, 587, 534$   $\text{cm}^{-1}$ .

Anal. Calcd for  $\text{C}_{22}\text{H}_{24}\text{NOP}$ : C, 75.62; H, 6.92; N, 4.01; P, 8.86. Found: C, 75.44; H, 6.85; N, 4.12; P, 8.71.

#### 4-{Bis[2-(4-chlorophenyl)ethyl]phosphoryl}-3-methylpyridine (6c).

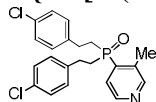

Yield: 213 mg (51%); waxy product.

$^1\text{H}$  NMR (400.13 MHz,  $\text{CDCl}_3$ ):  $\delta$  2.26 (m, 4H,  $\text{CH}_2\text{P}$ ), 2.56 (3H, Me- $\text{C}_3$ ), 2.72, 2.95 (m, 4H,  $\text{PhCH}_2$ ), 7.03 (d, 4H,  $\text{H}_o$ ,  $^3J_{\text{HH}} = 8.3$  Hz), 7.20 (d, 4H,  $\text{H}_m$ ,  $^3J_{\text{HH}} = 8.3$  Hz), 7.52 (dd, 1H,  $\text{H}_5$ , Py,  $^3J_{\text{PH}} = 11.7$  Hz,  $^3J_{5-6} = 4.5$  Hz), 8.51 (d, 1H,  $\text{H}_2$ , Py,  $^4J_{\text{PH}} = 4.5$  Hz), 8.58 (m, 1H,  $\text{H}_6$ , Py).

$^{13}\text{C}$  NMR (100.62 MHz,  $\text{CDCl}_3$ ):  $\delta$  18.5 (Me- $\text{C}_3$ ), 26.8 (d,  $\text{PhCH}_2$ ,  $^2J_{\text{CP}} = 2.4$  Hz), 31.6 (d,  $\text{CH}_2\text{P}$ ,  $^1J_{\text{CP}} = 65.9$  Hz), 125.2 (d,  $\text{C}_5$ , Py,  $^2J_{\text{CP}} = 6.8$  Hz), 128.7 ( $\text{C}_o$ ), 129.4 ( $\text{C}_m$ ), 132.3 ( $\text{C}_p$ ), 134.7 (d,  $\text{C}_3$ , Py,  $^2J_{\text{CP}} = 6.4$  Hz), 138.6 (d,  $\text{C}_i$ ,  $^3J_{\text{CP}} = 13.2$  Hz), 138.7 (d,  $\text{C}_4$ , Py,  $^1J_{\text{CP}} = 82.3$  Hz), 147.5 (d,  $\text{C}_6$ , Py,  $^3J_{\text{CP}} = 8.4$  Hz), 152.5 (d,  $\text{C}_2$ , Py,  $^3J_{\text{CP}} = 7.2$  Hz).

$^{31}\text{P}$  NMR (161.98 MHz,  $\text{CDCl}_3$ ):  $\delta$  39.4.

IR (neat):  $\nu_{\text{max}} = 3022, 2926, 2864, 1663, 1635, 1581, 1540, 1491, 1446, 1405, 1293, 1273, 1206, 1176, 1093, 1012, 919, 810, 768, 730, 653, 545, 513, 487$   $\text{cm}^{-1}$ .

Anal. Calcd for  $\text{C}_{22}\text{H}_{22}\text{Cl}_2\text{NOP}$ : C, 63.17; H, 5.30; Cl, 16.95; N, 3.35; P, 7.40. Found: C, 63.32; H, 5.21; Cl, 16.81; N, 3.31; P, 7.25.

#### 4-[Bis(2-phenylpropyl)phosphoryl]-3-methylpyridine (6d).

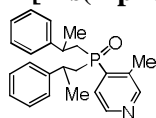

Yield: 165 mg (44%); waxy product. The product is a mixture of three stereoisomers in a ratio of 2.6:1.6:1 ( $^1\text{H}$  and  $^{31}\text{P}$  NMR data).

IR (neat):  $n_{\text{max}} = 3059, 3028, 2962, 2925, 2872, 1707, 1663, 1600, 1491, 1452, 1400, 1290, 1189, 1095, 1029, 913, 843, 766, 732, 703, 646, 598, 537, 489, 445 \text{ cm}^{-1}$ .

Anal. Calcd for  $\text{C}_{24}\text{H}_{28}\text{NOP}$ : C, 76.37; H, 7.48; N, 3.71; P, 8.21. Found: C, 76.12; H, 7.40; N, 3.59; P, 8.07.

#### ***R,R(S,S)*-stereoisomer (major).**

$^1\text{H}$  NMR (400.13 MHz,  $\text{CDCl}_3$ ):  $d$  1.20, 1.26 (d, 6H,  $\text{PhCH}(\underline{\text{Me}})$ ,  $^3J_{\text{HH}} = 7.0 \text{ Hz}$ ), 1.81, 1.95, 2.16, 2.25 (m, 4H,  $\text{CH}_2\text{P}$ ), 2.33 (s, 3H,  $\underline{\text{Me}}\text{-C}_3$ ), 2.92, 3.41 (m, 2H,  $\text{PhCH}(\underline{\text{H}})(\text{Me})$ ), 6.80–7.34 (m, 10H, Ph), 7.40 (m, 1H,  $\text{H}_5$ , Py), 8.26 (d, 1H,  $\text{H}_2$ , Py,  $^3J_{\text{PH}} = 5.3 \text{ Hz}$ ), 8.39 (dd, 1H,  $\text{H}_6$ , Py,  $^3J_{6-5} = 4.7 \text{ Hz}$ ,  $^3J_{\text{PH}} = 3.1 \text{ Hz}$ ).

$^{13}\text{C}$  NMR (100.62 MHz,  $\text{CDCl}_3$ ):  $d$  18.47 (d,  $\underline{\text{Me}}\text{-C}_3$ ,  $^3J_{\text{CP}} = 2.4 \text{ Hz}$ ), 23.82, 24.19 (2d,  $\text{PhCH}(\underline{\text{Me}})$ ,  $^3J_{\text{CP}} = 9.5 \text{ Hz}$ ,  $^3J_{\text{CP}} = 9.1 \text{ Hz}$ ), 34.09 (d,  $\text{PhCH}(\underline{\text{H}})(\text{Me})$ ,  $^2J_{\text{CP}} = 3.7 \text{ Hz}$ ), 37.79, 39.87 (2d,  $\text{CH}_2\text{P}$ ,  $^1J_{\text{CP}} = 45.7 \text{ Hz}$ ,  $^1J_{\text{CP}} = 45.0 \text{ Hz}$ ), 125.49 (d,  $\text{C}_5$ , Py,  $^2J_{\text{CP}} = 7.7 \text{ Hz}$ ), 126.45, 126.50 ( $\text{C}_o$ ), 126.67, 128.52 ( $\text{C}_p$ ), 128.16, 128.22 ( $\text{C}_m$ ), 133.82 (d,  $\text{C}_3$ , Py,  $^2J_{\text{CP}} = 7.3 \text{ Hz}$ ), 140.45 (d,  $\text{C}_4$ , Py,  $^1J_{\text{CP}} = 81.2 \text{ Hz}$ ), 145.25, 146.01 (2d,  $\text{C}_i$ ,  $^3J_{\text{CP}} = 7.2 \text{ Hz}$ ,  $^3J_{\text{CP}} = 6.7 \text{ Hz}$ ), 146.96 (d,  $\text{C}_6$ , Py,  $^3J_{\text{CP}} = 8.9 \text{ Hz}$ ), 151.75 (d,  $\text{C}_2$ , Py,  $^3J_{\text{CP}} = 8.3 \text{ Hz}$ ).

$^{31}\text{P}$  NMR (161.98 MHz,  $\text{CDCl}_3$ ):  $d$  37.6.

#### ***R,S(S,R)R<sub>p</sub>- and R,S(S,R)S<sub>p</sub>*-stereoisomers:**

**Medium.**  $^1\text{H}$  NMR (400.13 MHz,  $\text{CDCl}_3$ ):  $d$  1.35 (d, 6H,  $\text{PhCH}(\underline{\text{Me}})$ ,  $^3J_{\text{HH}} = 7.0 \text{ Hz}$ ), 2.15 (s, 3H,  $\underline{\text{Me}}\text{-C}_3$ ), 2.24, 2.27 (m, 4H,  $\text{CH}_2\text{P}$ ), 3.08 (m, 2H,  $\text{PhCH}(\underline{\text{H}})(\text{Me})$ ), 6.80–7.34 (m, 10H, Ph), 7.30 (m, 1H,  $\text{H}_5$ , Py), 8.08 (d, 1H,  $\text{H}_2$ , Py,  $^3J_{\text{PH}} = 5.3 \text{ Hz}$ ), 8.29 (dd, 1H,  $\text{H}_6$ , Py,  $^3J_{6-5} = 4.7 \text{ Hz}$ ,  $^3J_{\text{PH}} = 3.0 \text{ Hz}$ ).

$^{13}\text{C}$  NMR (100.62 MHz,  $\text{CDCl}_3$ ):  $d$  18.37 (d,  $\underline{\text{Me}}\text{-C}_3$ ,  $^3J_{\text{CP}} = 2.8 \text{ Hz}$ ), 24.01 (d,  $\text{PhCH}(\underline{\text{Me}})$ ,  $^3J_{\text{CP}} = 8.7 \text{ Hz}$ ), 34.13 (d,  $\text{PhCH}(\underline{\text{H}})(\text{Me})$ ,  $^2J_{\text{CP}} = 3.8 \text{ Hz}$ ), 39.18 (d,  $\text{CH}_2\text{P}$ ,  $^1J_{\text{CP}} = 37.6 \text{ Hz}$ ), 126.14 (d,  $\text{C}_5$ , Py,  $^2J_{\text{CP}} = 7.2 \text{ Hz}$ ), 126.75 ( $\text{C}_p$ ), 126.97 ( $\text{C}_o$ ), 128.68 ( $\text{C}_m$ ), 133.56 (d,  $\text{C}_3$ , Py,  $^2J_{\text{CP}} = 7.5 \text{ Hz}$ ), 138.93 (d,  $\text{C}_4$ , Py,  $^1J_{\text{CP}} = 81.2 \text{ Hz}$ ), 145.30 (d,  $\text{C}_i$ ,  $^3J_{\text{CP}} = 7.4 \text{ Hz}$ ), 146.64 (d,  $\text{C}_6$ , Py,  $^3J_{\text{CP}} = 9.1 \text{ Hz}$ ), 151.33 (d,  $\text{C}_2$ , Py,  $^3J_{\text{CP}} = 8.3 \text{ Hz}$ ).

$^{31}\text{P}$  NMR (161.98 MHz,  $\text{CDCl}_3$ ):  $d$  37.8.

**Minor.**  $^1\text{H}$  NMR (400.13 MHz,  $\text{CDCl}_3$ ):  $d$  1.14 (d, 6H,  $\text{PhCH}(\underline{\text{Me}})$ ,  $^3J_{\text{HH}} = 7.0 \text{ Hz}$ ), 2.04, 2.14 (m, 4H,  $\text{CH}_2\text{P}$ ), 2.50 (s, 3H,  $\underline{\text{Me}}\text{-C}_3$ ), 3.17 (m, 2H,  $\text{PhCH}(\underline{\text{H}})(\text{Me})$ ), 6.80–7.34 (m, 10H, Ph), 7.39 (m, 1H,  $\text{H}_5$ , Py), 8.41 (d, 1H,  $\text{H}_2$ , Py,  $^3J_{\text{PH}} = 5.3 \text{ Hz}$ ), 8.46 (dd, 1H,  $\text{H}_6$ , Py,  $^3J_{6-5} = 4.4 \text{ Hz}$ ,  $^3J_{\text{PH}} = 3.6 \text{ Hz}$ ).

$^{13}\text{C}$  NMR (100.62 MHz,  $\text{CDCl}_3$ ):  $d$  18.47 (d,  $\underline{\text{Me}}\text{-C}_3$ ,  $^3J_{\text{CP}} = 2.4 \text{ Hz}$ ), 23.66 (d,  $\text{PhCH}(\underline{\text{Me}})$ ,  $^3J_{\text{CP}} = 8.6 \text{ Hz}$ ), 33.98 (d,  $\text{PhCH}(\underline{\text{H}})(\text{Me})$ ,  $^2J_{\text{CP}} = 3.5 \text{ Hz}$ ), 38.44 (d,  $\text{CH}_2\text{P}$ ,  $^1J_{\text{CP}} = 37.5 \text{ Hz}$ ), 124.73 (d,  $\text{C}_5$ , Py,  $^2J_{\text{CP}} = 7.9 \text{ Hz}$ ), 126.60 ( $\text{C}_p$ ), 126.68 ( $\text{C}_o$ ), 128.68 ( $\text{C}_m$ ), 134.32 (d,  $\text{C}_3$ , Py,  $^2J_{\text{CP}} = 6.8 \text{ Hz}$ ), 141.71 (d,  $\text{C}_4$ , Py,  $^1J_{\text{CP}} = 81.3 \text{ Hz}$ ), 145.79 (d,  $\text{C}_i$ ,  $^3J_{\text{CP}} = 7.8 \text{ Hz}$ ), 147.15 (d,  $\text{C}_6$ , Py,  $^3J_{\text{CP}} = 9.0 \text{ Hz}$ ), 152.14 (d,  $\text{C}_2$ , Py,  $^3J_{\text{CP}} = 8.3 \text{ Hz}$ ).

$^{31}\text{P}$  NMR (161.98 MHz,  $\text{CDCl}_3$ ):  $d$  37.1.

#### 4-[Bis(2-phenylethyl)thiophosphoryl]pyridine-d<sub>4</sub>

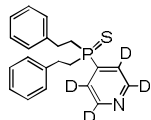

Yield: 149 mg (42%); waxy product.

$^1\text{H}$  NMR (400.13 MHz,  $\text{CDCl}_3$ ):  $d$  2.41 (m, 4H,  $\text{CH}_2\text{P}$ ), 2.72, 3.04 (m, 4H,  $\text{PhCH}_2$ ), 7.11, 7.19, 7.25 (m, 10H, Ph).

$^{13}\text{C}$  NMR (100.62 MHz,  $\text{CDCl}_3$ ):  $d$  28.1 (d,  $\text{PhCH}_2$ ,  $^2J_{\text{CP}} = 2.4$  Hz), 34.3 (d,  $\text{CH}_2\text{P}$ ,  $^1J_{\text{CP}} = 51.9$  Hz), 124.3 (br m,  $\text{C}_{3,5}$ , Py), 126.5 ( $\text{C}_p$ ), 128.1 ( $\text{C}_o$ ), 128.5 ( $\text{C}_m$ ), 139.9 (d,  $\text{C}_i$ ,  $^3J_{\text{CP}} = 14.8$  Hz), 140.4 (d,  $\text{C}_4$ , Py,  $^1J_{\text{CP}} = 67.1$  Hz), 149.3 (br m,  $\text{C}_{2,6}$ , Py).

$^{31}\text{P}$  NMR (161.98 MHz,  $\text{CDCl}_3$ ):  $d$  45.1.

Anal. Calcd for  $\text{C}_{21}\text{H}_{18}\text{D}_4\text{NPS}$ : C, 70.96; H, 5.10; N, 3.94. Found: C, 71.25; H, 6.69; N, 3.84.

**Reaction of pyridine 1a, bis(2-phenylethyl)phosphine selenide 2i and 2-furoylacetylene 8.** A solution of pyridine **1a** (1.1 mmol), bis(2-phenylethyl)phosphine selenide **2i** (1.0 mmol) and 2-furoylacetylene **8** (1.1 mmol) in MeCN (3 mL) was stirred under an argon atmosphere at 20–25 °C for 3 h. After completion of the reaction ( $^{31}\text{P}$  NMR monitoring), the solvent was removed under the reduced pressure. The reaction mixture contained phosphorylated *N*-ethenyl-1,4-dihydropyridine **9** and 4-selenophosphoryl pyridine **4i** in a 4:1 ratio ( $^1\text{H}$  and  $^{31}\text{P}$  NMR data). 1,4-Dihydropyridine **9** was almost completely converted to the corresponding phosphoryl pyridine **4i** for 8–10 days in a  $\text{CDCl}_3$  solution.

#### (*E*)-3-[4-(diphenethylphosphoroselenoyl)-1(4*H*)-pyridinyl]-1-(2-furyl)-2-propen-1-one (**9**).

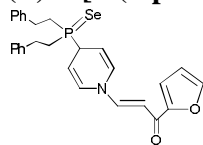

$^1\text{H}$  NMR (400.13 MHz,  $\text{CDCl}_3$ ):  $d$  2.46 (m, 4H,  $\text{CH}_2\text{P}$ ), 2.92 (m, 4H,  $\text{PhCH}_2$ ), 3.65 (dt, 1H,  $\text{H}_4$ , Py,  $^3J_{\text{P-4}} = 18.3$  Hz,  $^3J_{4-3} = 4.1$  Hz), 5.15 (m, 2H,  $\text{H}_{3,5}$ , Py), 6.20 (d, 1H,  $=\text{CHC}=\text{O}$ ,  $^3J_{\text{HH}} = 13.4$  Hz), 6.47 (m, 2H,  $\text{H}_{2,6}$ , Py), 6.56 (dd, 1H,  $\text{H}_4$ , Furyl,  $^3J_{\text{HH}} = 3.5$  Hz,  $^3J_{\text{HH}} = 1.4$  Hz), 7.08 (m, 1H,  $\text{H}_3$ , Furyl), 7.08-7.24 (m, 10H, Ph), 7.39 (d, 1H,  $>\text{NCH}=\text{}$ ,  $^3J_{\text{HH}} = 13.4$  Hz), 7.48 (m,  $\text{H}_5$ , Furyl).

$^{13}\text{C}$  NMR (100.62 MHz,  $\text{CDCl}_3$ ):  $d$  28.8 (d,  $\text{PhCH}_2$ ,  $^2J_{\text{CP}} = 1.9$  Hz), 33.4 (d,  $\text{CH}_2\text{P}$ ,  $^1J_{\text{CP}} = 46.2$  Hz), 39.7 (d,  $\text{C}_4$ , Py,  $^1J_{\text{PC}} = 41.4$  Hz), 96.9 ( $=\text{CHC}=\text{O}$ ), 103.6 ( $\text{C}_{3,5}$ , Py), 112.2 ( $\text{C}_{2,6}$ , Py), 112.82 ( $\text{C}_4$ , Furyl), 115.4 ( $\text{C}_3$ , Furyl), 126.4 ( $\text{C}_p$ ), 128.2, 128.5 ( $\text{C}_{o,m}$ ), 139.7, 140.2 (2d,  $\text{C}_i$ ,  $^3J_{\text{PC}} = 13.3$  Hz,  $^3J_{\text{PC}} = 14.6$  Hz), 143.1 ( $>\text{NCH}=\text{}$ ), 145.3 ( $\text{C}_5$ , Furyl), 153.6 ( $\text{C}_2$ , Furyl), 177.1 ( $\text{C}=\text{O}$ ).  $^{31}\text{P}$  NMR (161.98 MHz,  $\text{CDCl}_3$ ):  $d$  45.7 (+d-satellites,  $^1J_{\text{PSe}} = 711.5$  Hz).

$^{77}\text{Se}$  NMR (76.31 MHz,  $\text{CDCl}_3$ ):  $d$  -421.1 (d,  $^1J_{\text{PSe}} = 711.5$  Hz).

### Reduction of phosphine selenide **4k** to 4-[bis(2-phenylethyl)phosphino]pyridine (**10**).

To a solution of phosphine selenide **4i** (0.2 g, 0.5 mmol) in 6.0 mL of toluene, sodium (0.12 g, 5.0 mmol) was added. The reaction mixture was stirred at reflux for 1 h under an argon atmosphere. The precipitated sodium selenide was separated by filtration. The filtrate was evaporated in vacuo to give phosphine **10**.

Yield: 152 mg (95%); waxy product.

$^1\text{H}$  NMR (400.13 MHz,  $\text{CDCl}_3$ ): *d* 2.08 (m, 4H,  $\text{CH}_2\text{P}$ ), 2.70 (m, 4H,  $\text{PhCH}_2$ ), 7.17, 7.27 (m, 10H, Ph), 7.37 (m, 2H,  $\text{H}_{3,5}$ , Py), 8.56 (m, 2H,  $\text{H}_{2,6}$ , Py).

$^{13}\text{C}$  NMR (100.62 MHz,  $\text{CDCl}_3$ ): *d* 28.6 (d,  $\text{PhCH}_2$ ,  $^2J_{\text{CP}} = 14.4$  Hz), 32.0 (d,  $\text{CH}_2\text{P}$ ,  $^1J_{\text{CP}} = 14.4$  Hz), 126.2 ( $\text{C}_p$ ), 126.4 (d,  $\text{C}_{3,5}$ , Py,  $^2J_{\text{CP}} = 14.8$  Hz), 128.1 ( $\text{C}_o$ ), 128.5 ( $\text{C}_m$ ), 142.0 (d,  $\text{C}_i$ ,  $^3J_{\text{CP}} = 10.8$  Hz), 149.4 (d,  $\text{C}_{2,6}$ , Py,  $^3J_{\text{CP}} = 4.4$  Hz), 149.6 (d,  $\text{C}_4$ , Py,  $^1J_{\text{CP}} = 22.4$  Hz).

$^{31}\text{P}$  NMR (161.98 MHz,  $\text{CDCl}_3$ ): *d* -22.9.

Anal. Calcd for  $\text{C}_{21}\text{H}_{22}\text{NP}$ : C, 78.97; H, 6.94; N, 4.39; P, 9.70. Found: C, 78.85; H, 6.86; N, 4.25; P, 9.62.

# 4-(Diphenylphosphoryl)pyridine (4a)

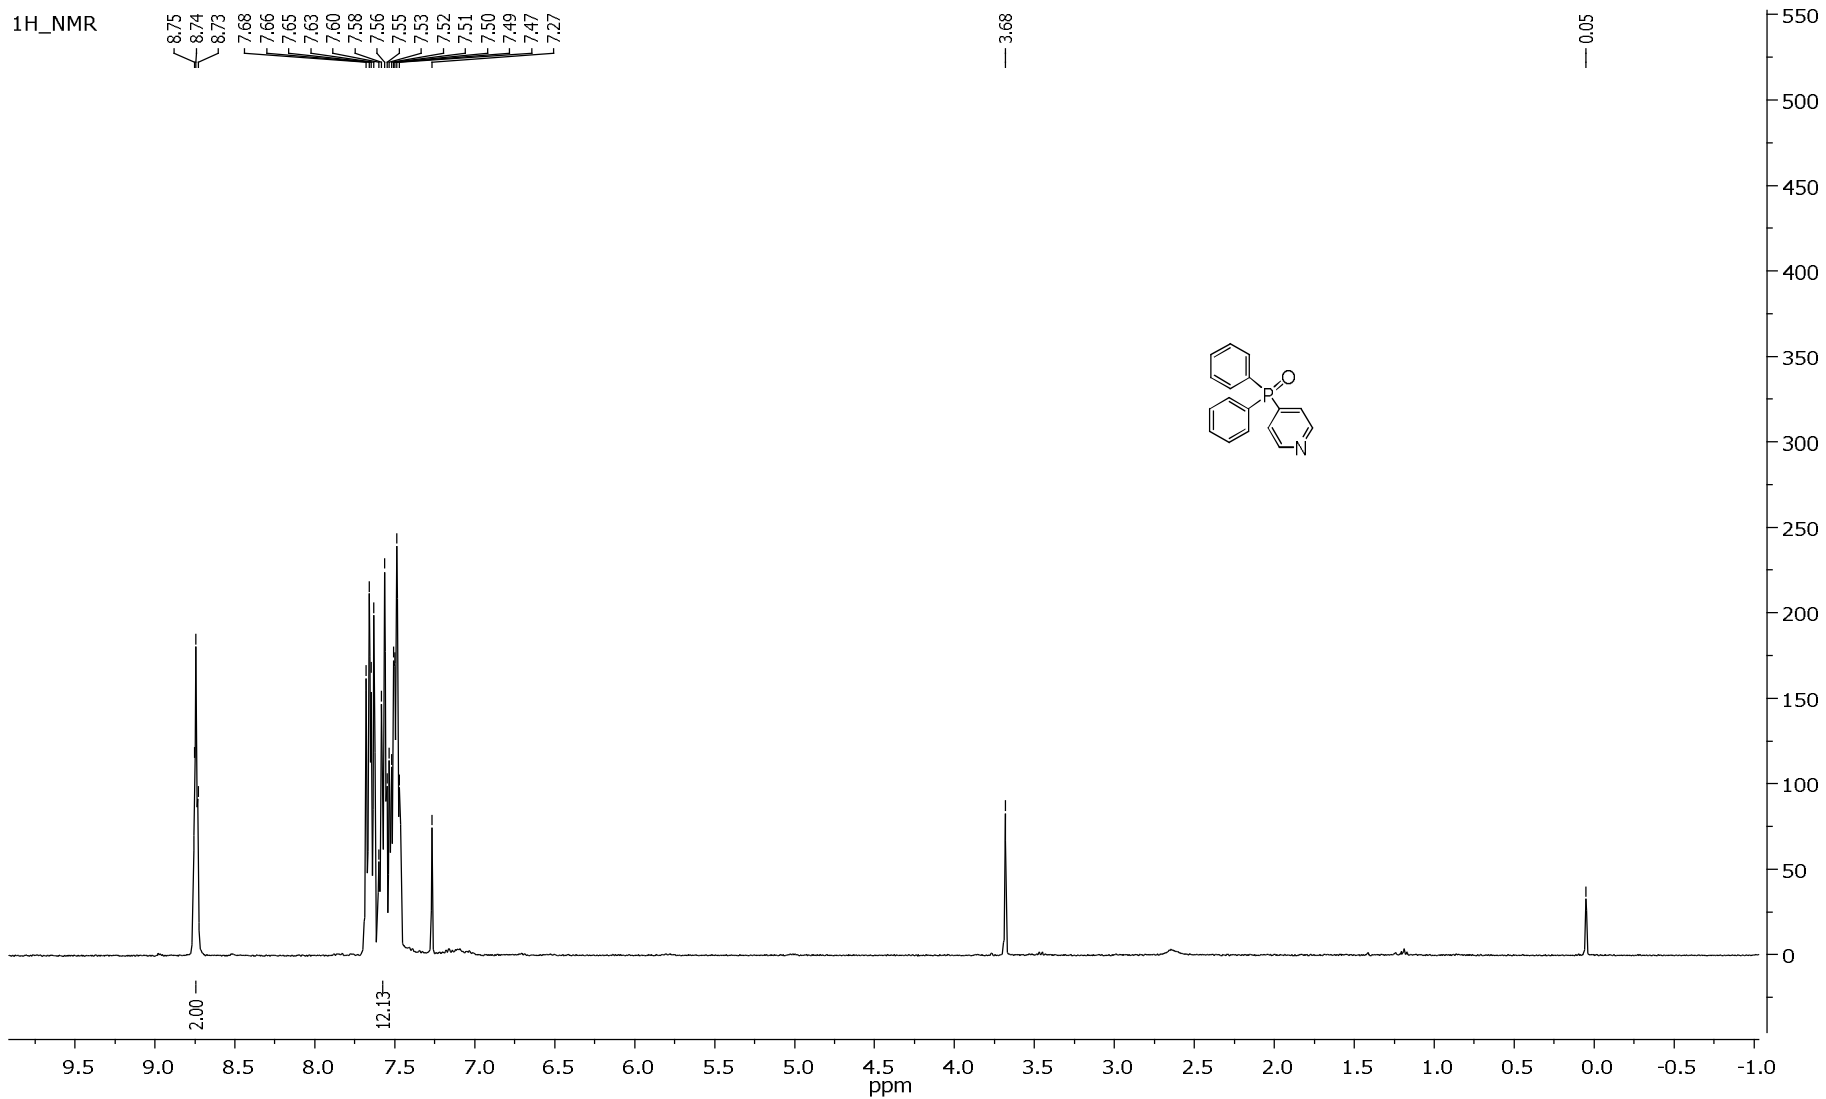



# 4-(Diphenylphosphoryl)pyridine (4a)

<sup>13</sup>C\_NMR

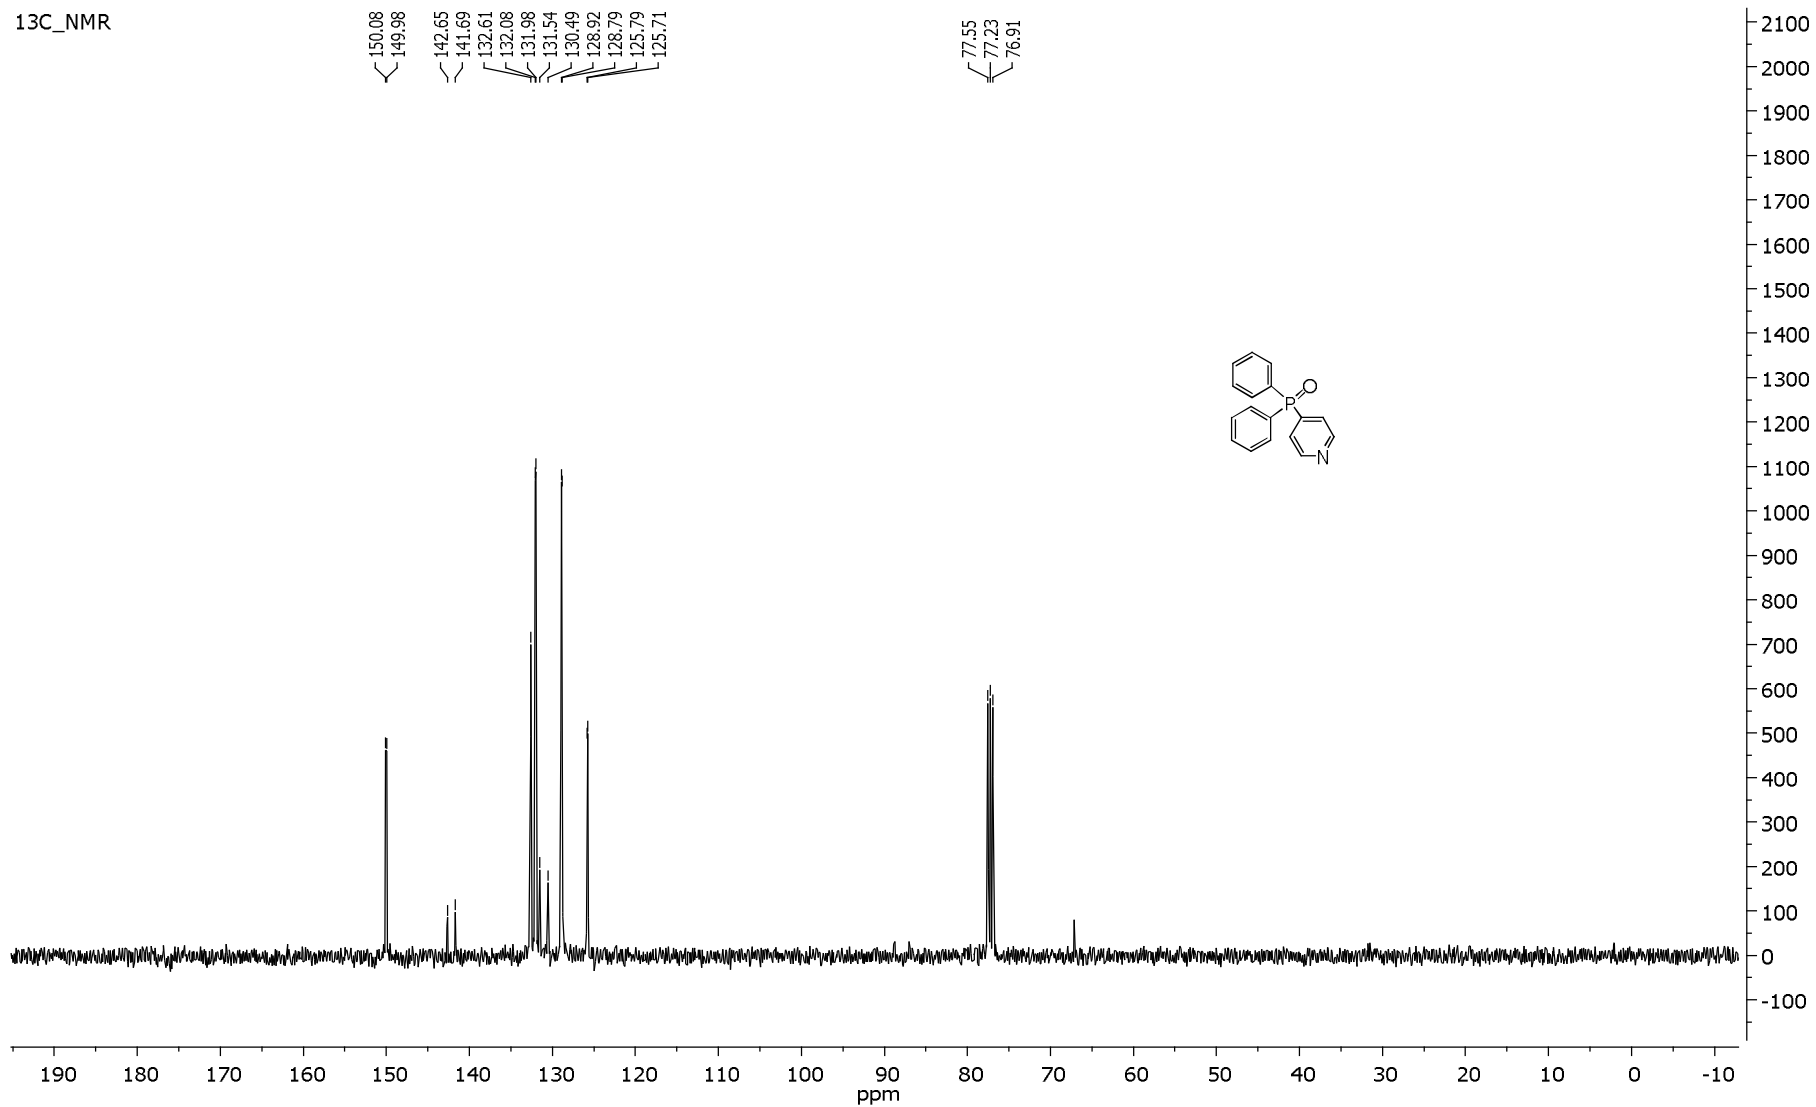

# 4-(Diphenylphosphoryl)pyridine (4a)

31P\_NMR

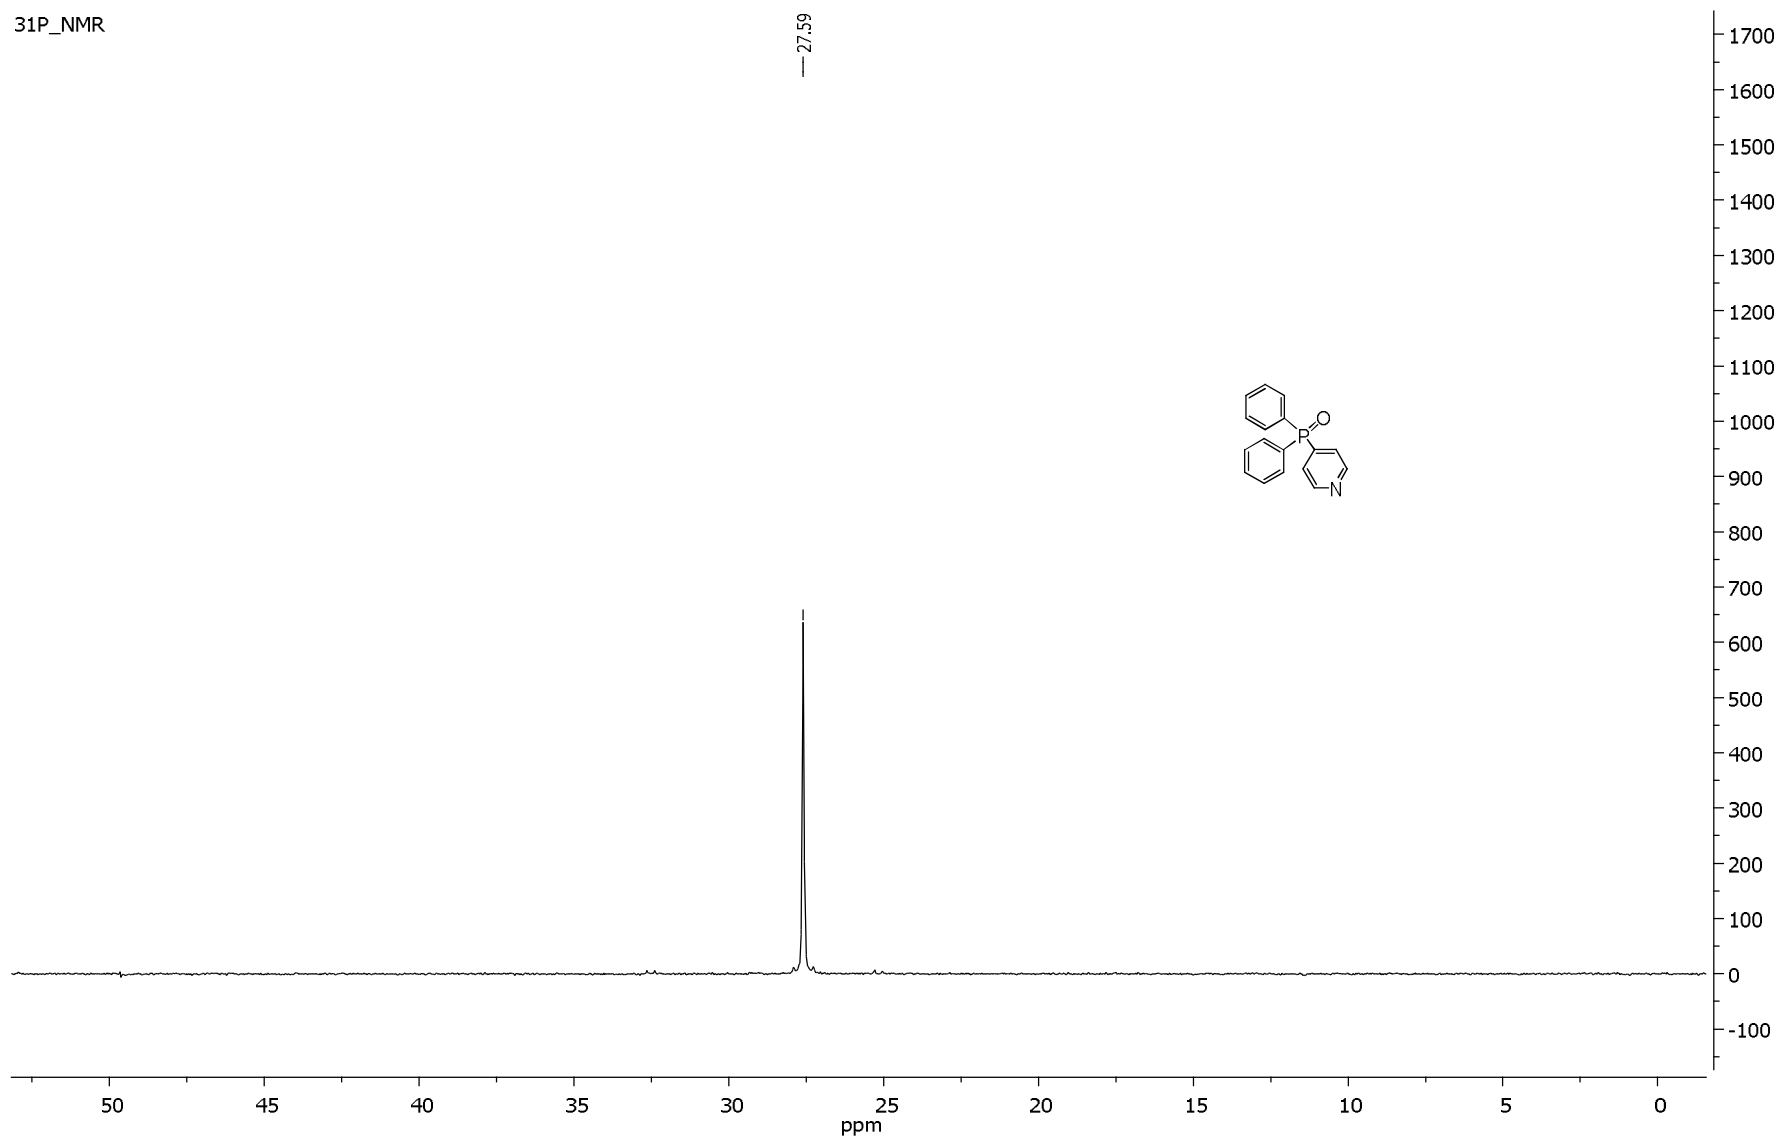

4-(Diphenylphosphoryl)pyridine (4a)

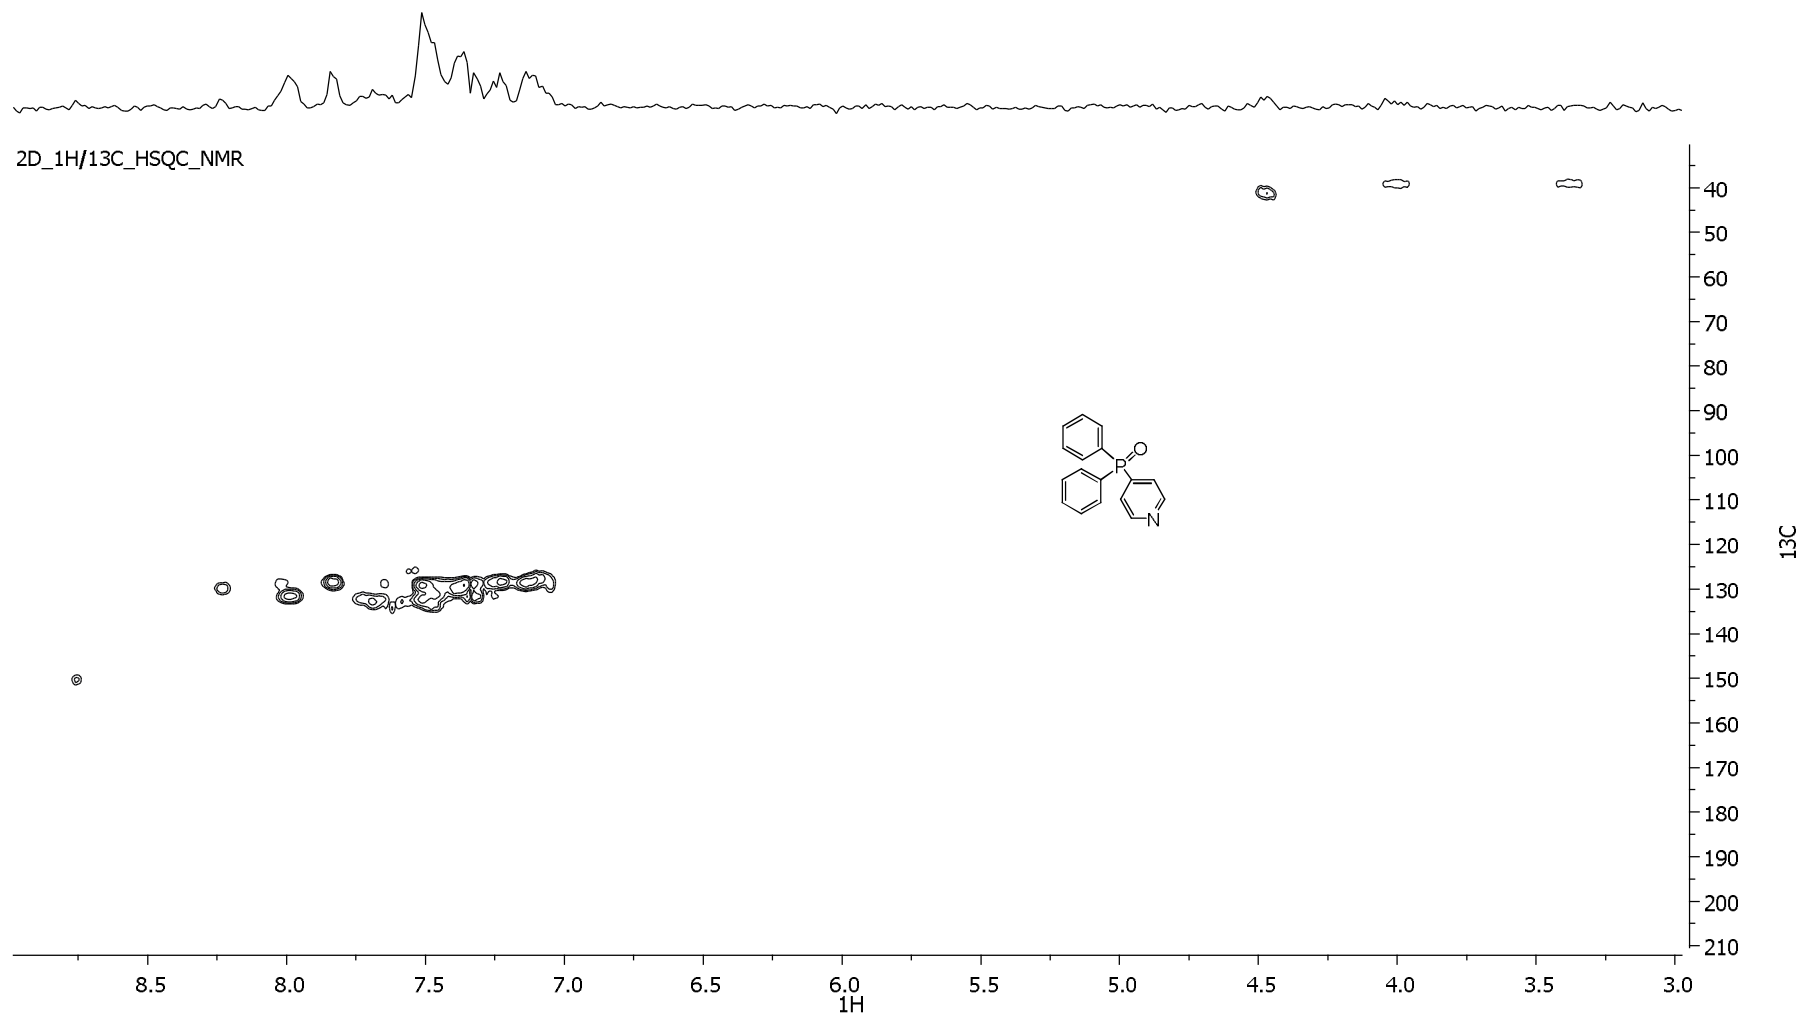

**4-(Diphenylphosphoryl)pyridine (4a)**

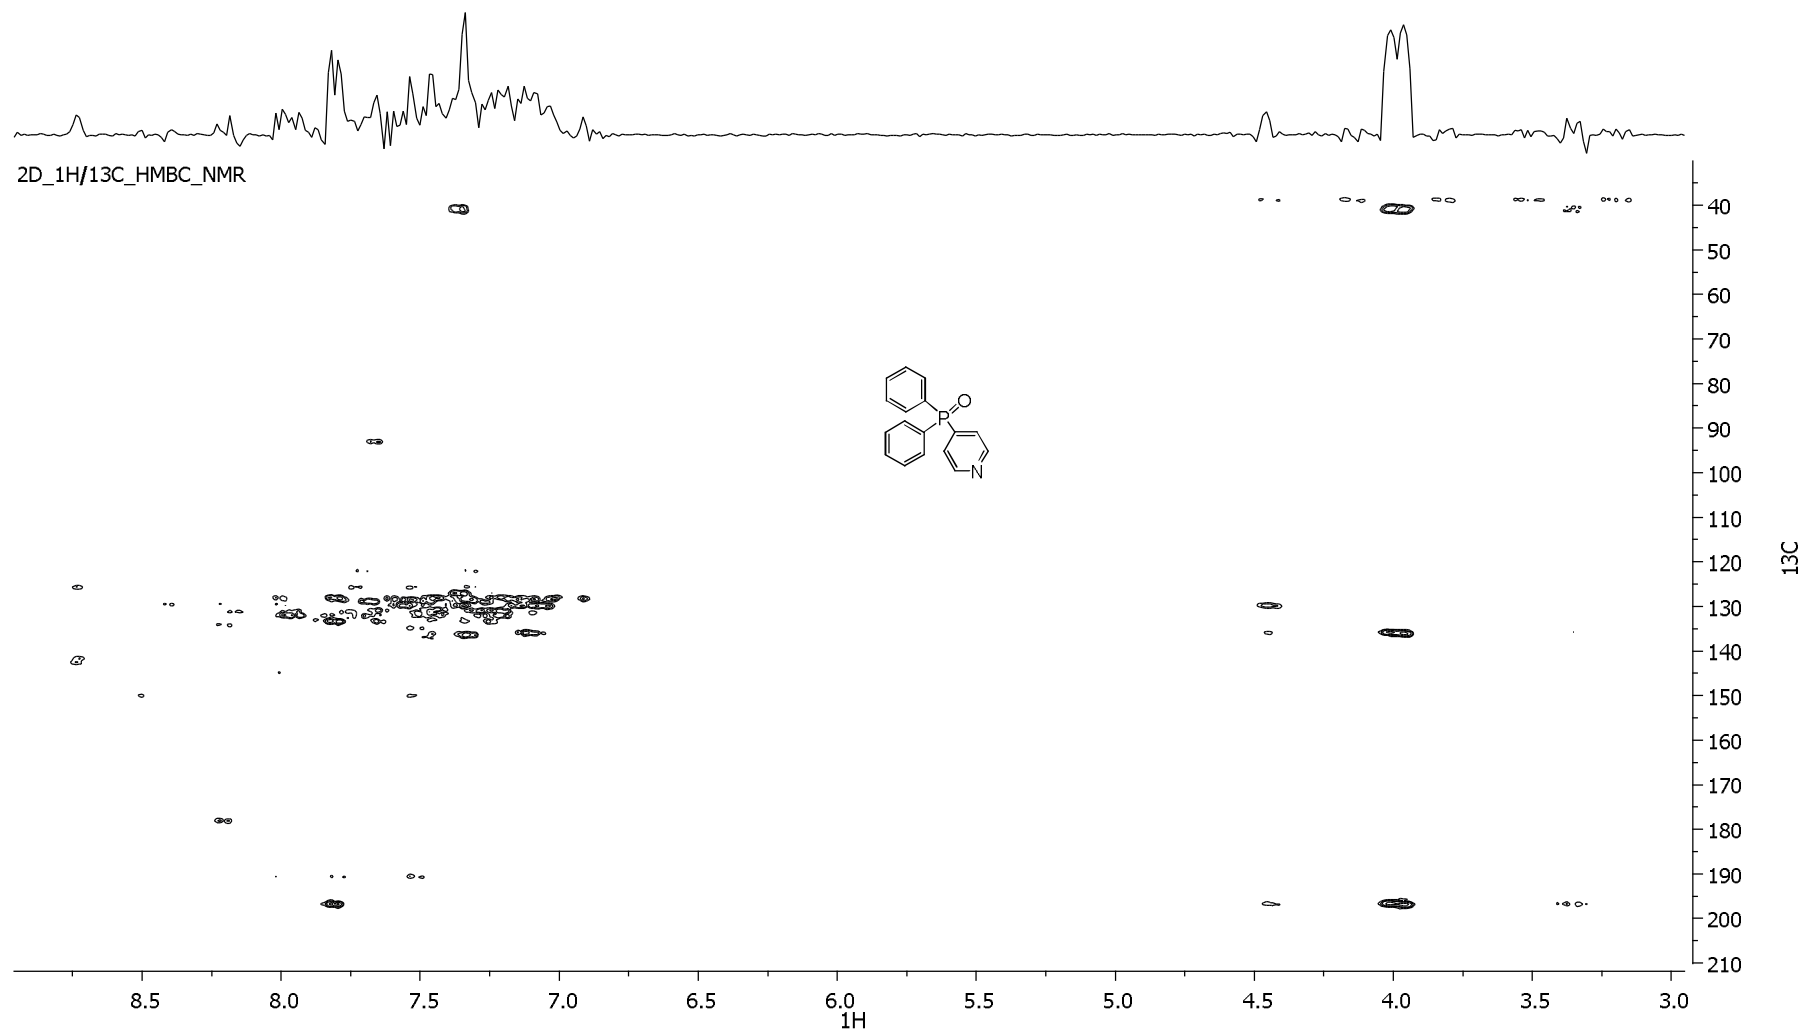

# 4-(Diphenylphosphoryl)pyridine (4a)

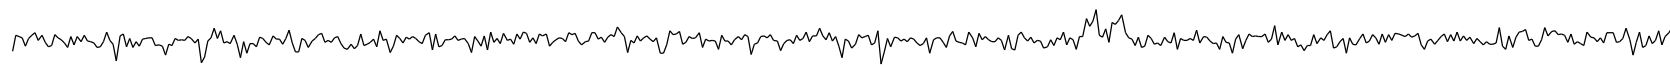

2D-1H/15N\_HMBC\_NMR

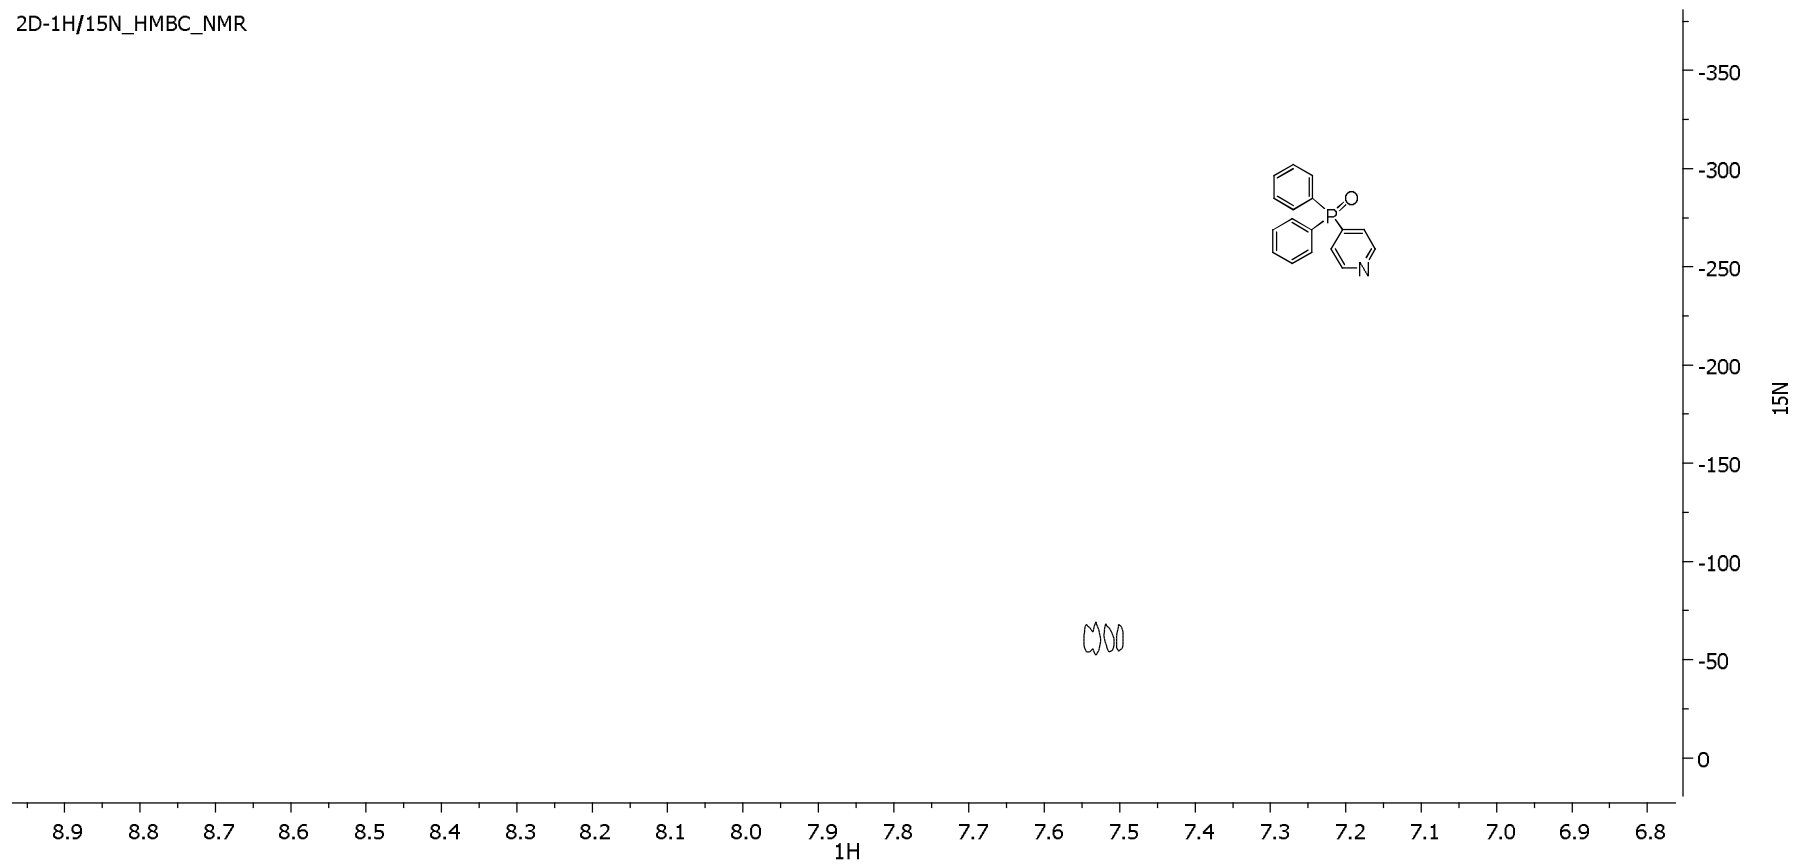

# 4-[Bis(2-phenylethyl)phosphoryl]pyridine (4b)

<sup>1</sup>H\_NMR

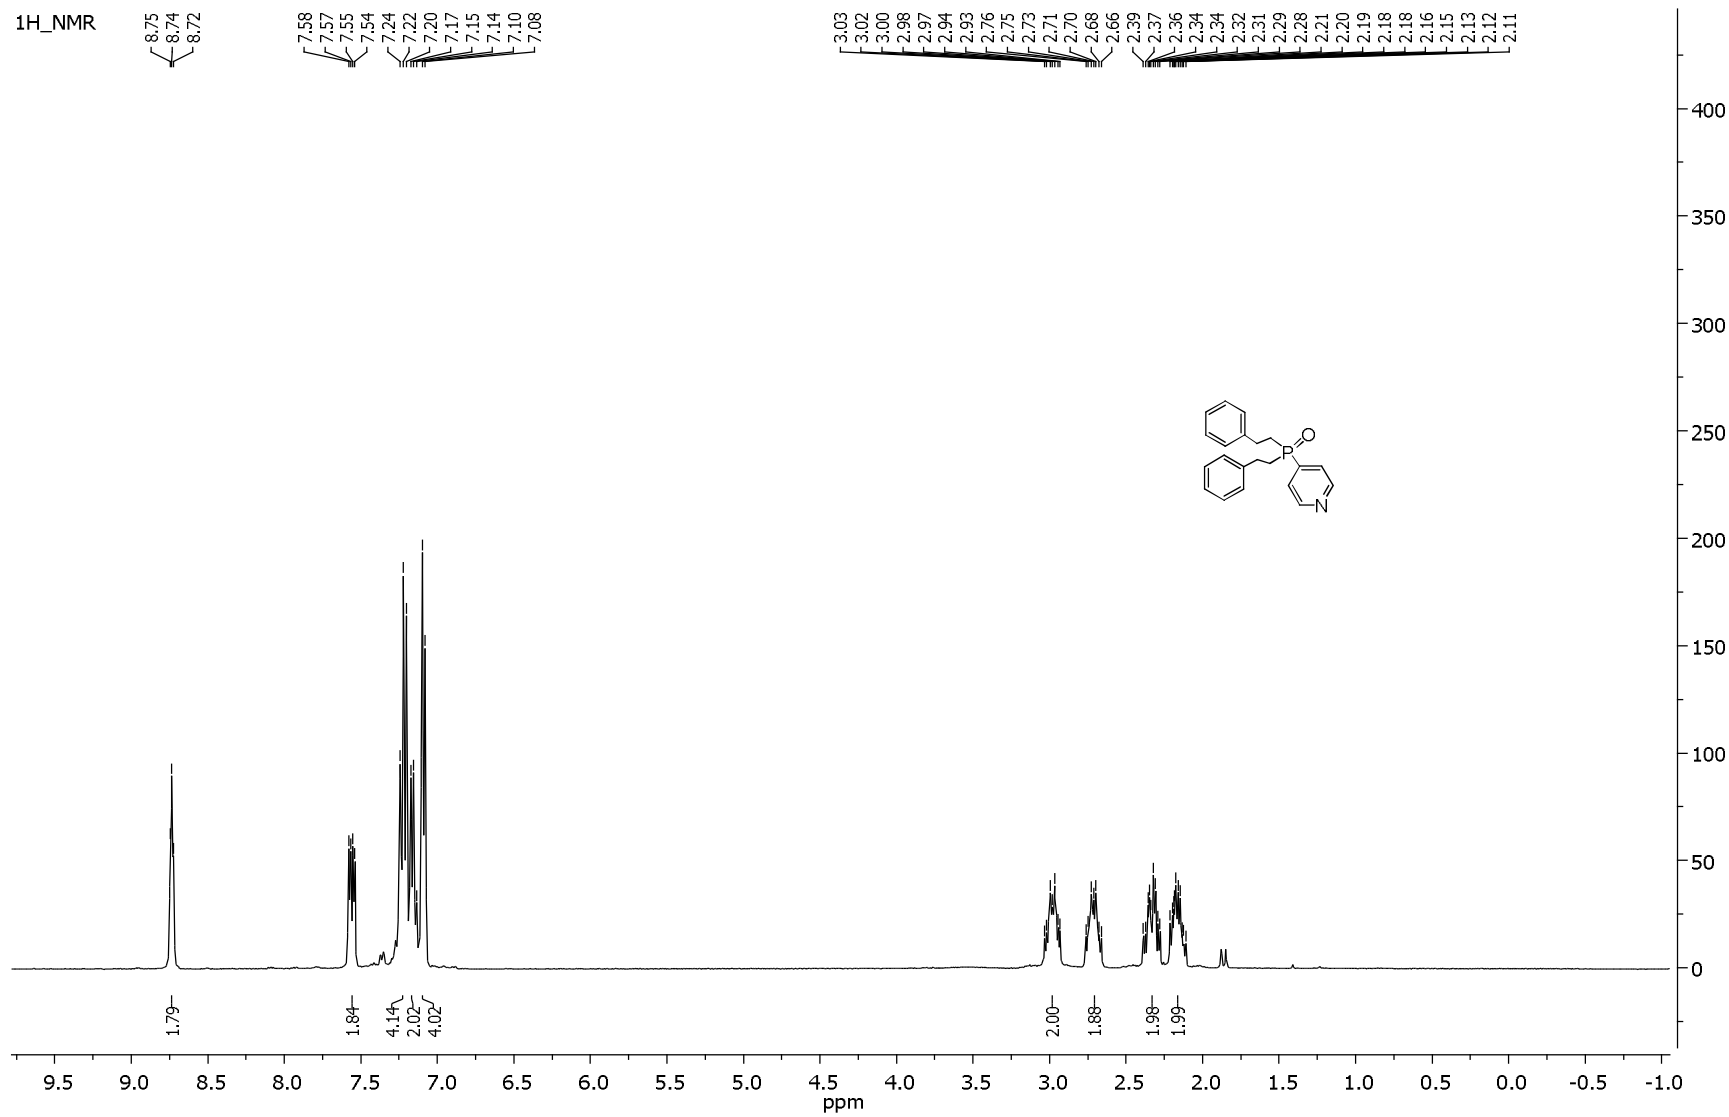

# 4-[Bis(2-phenylethyl)phosphoryl]pyridine (4b)

<sup>13</sup>C-NMR

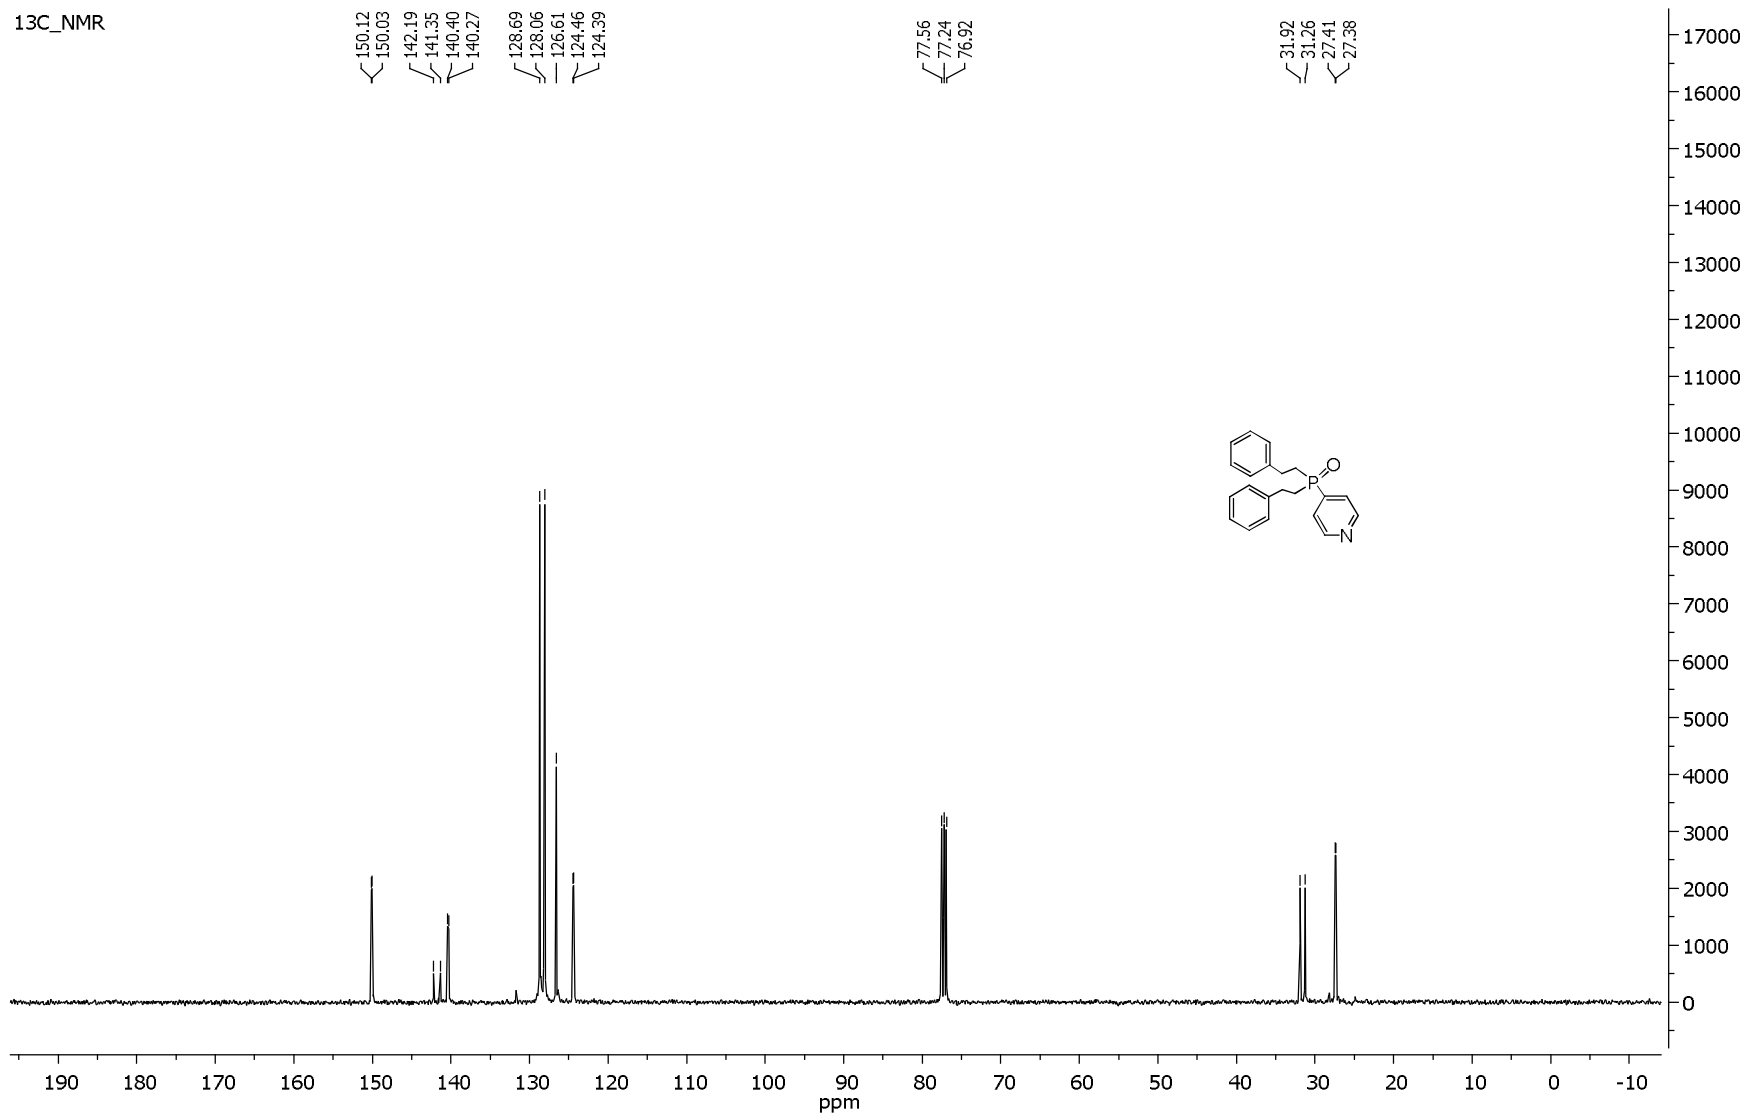

4-[Bis(2-phenylethyl)phosphoryl]pyridine (4b)

31P\_NMR

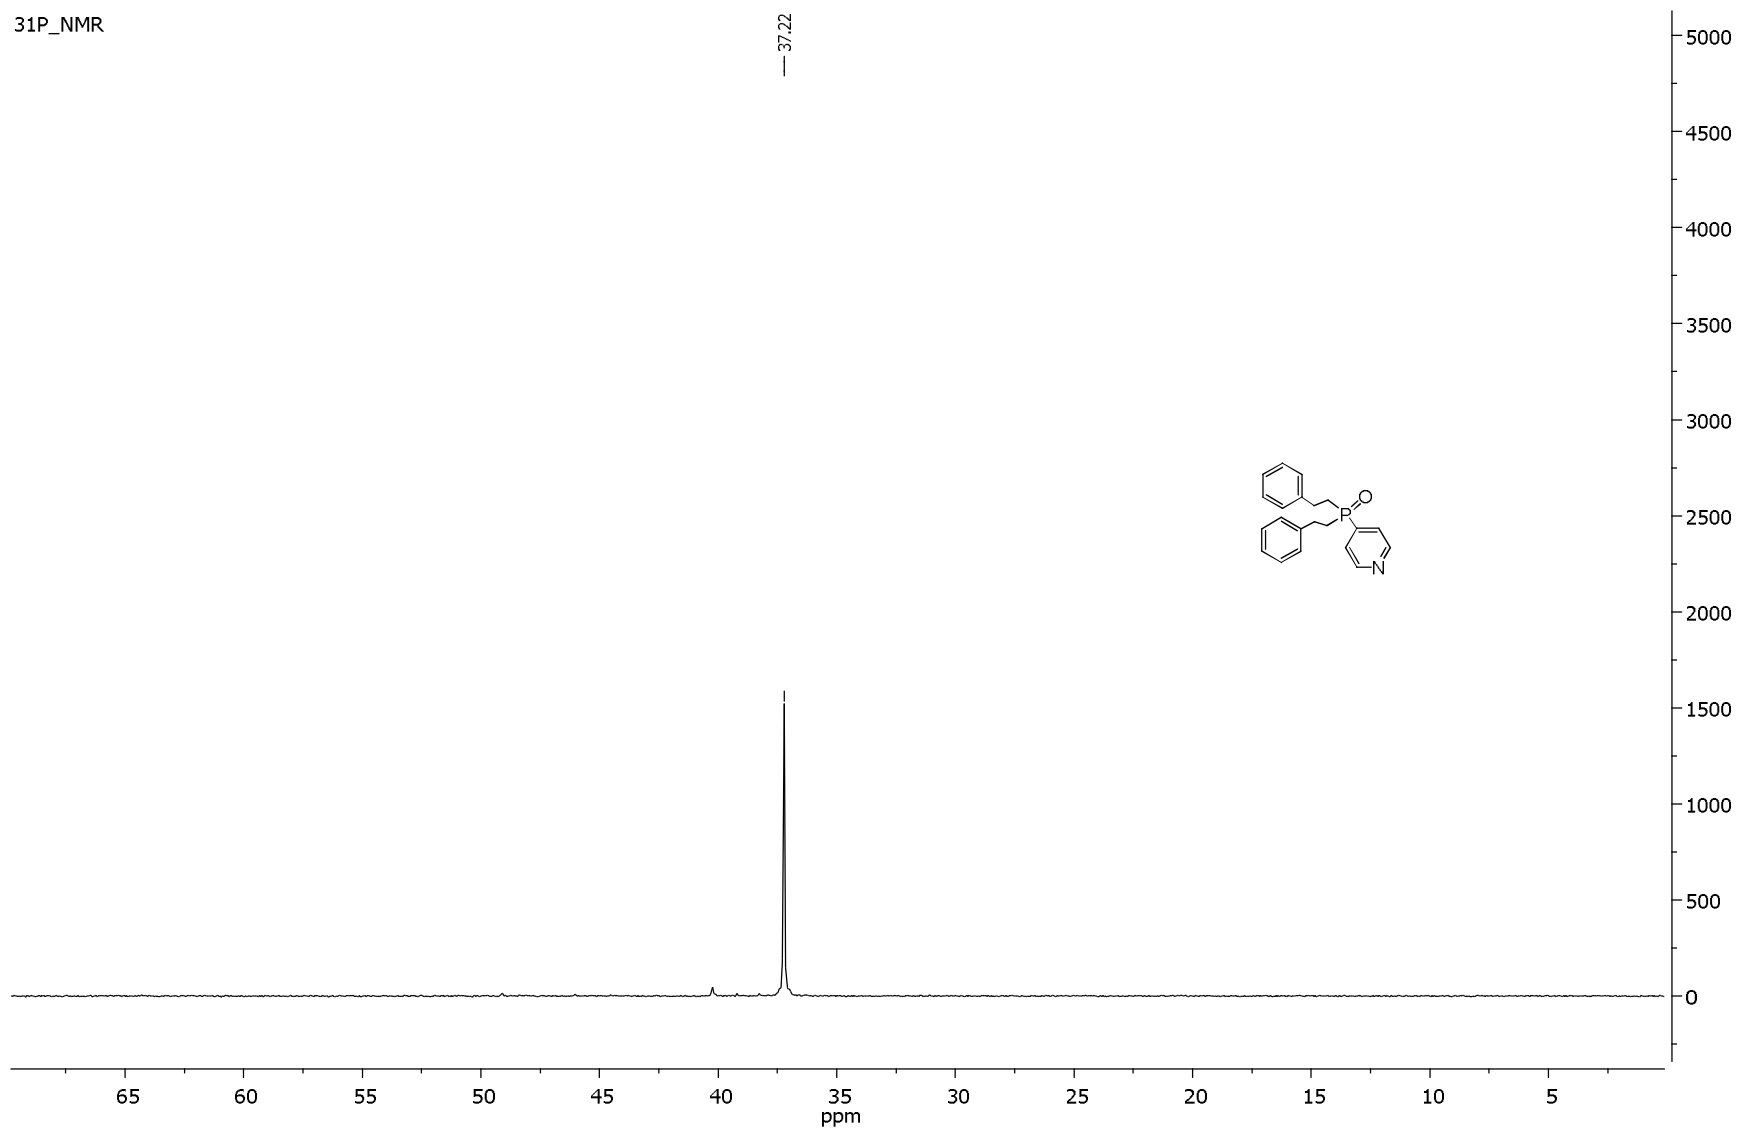



4-[Bis(2-phenylethyl)phosphoryl]pyridine (4b)

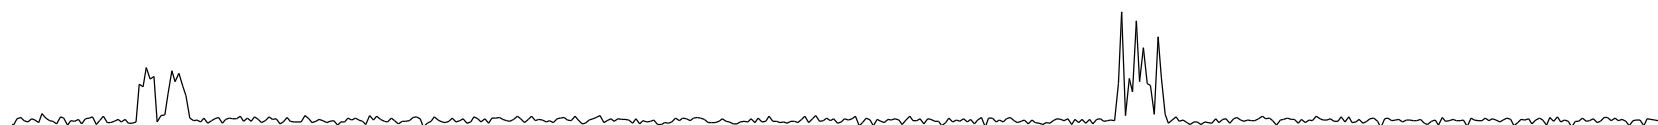

2D\_1H/15N\_HMBC\_NMR

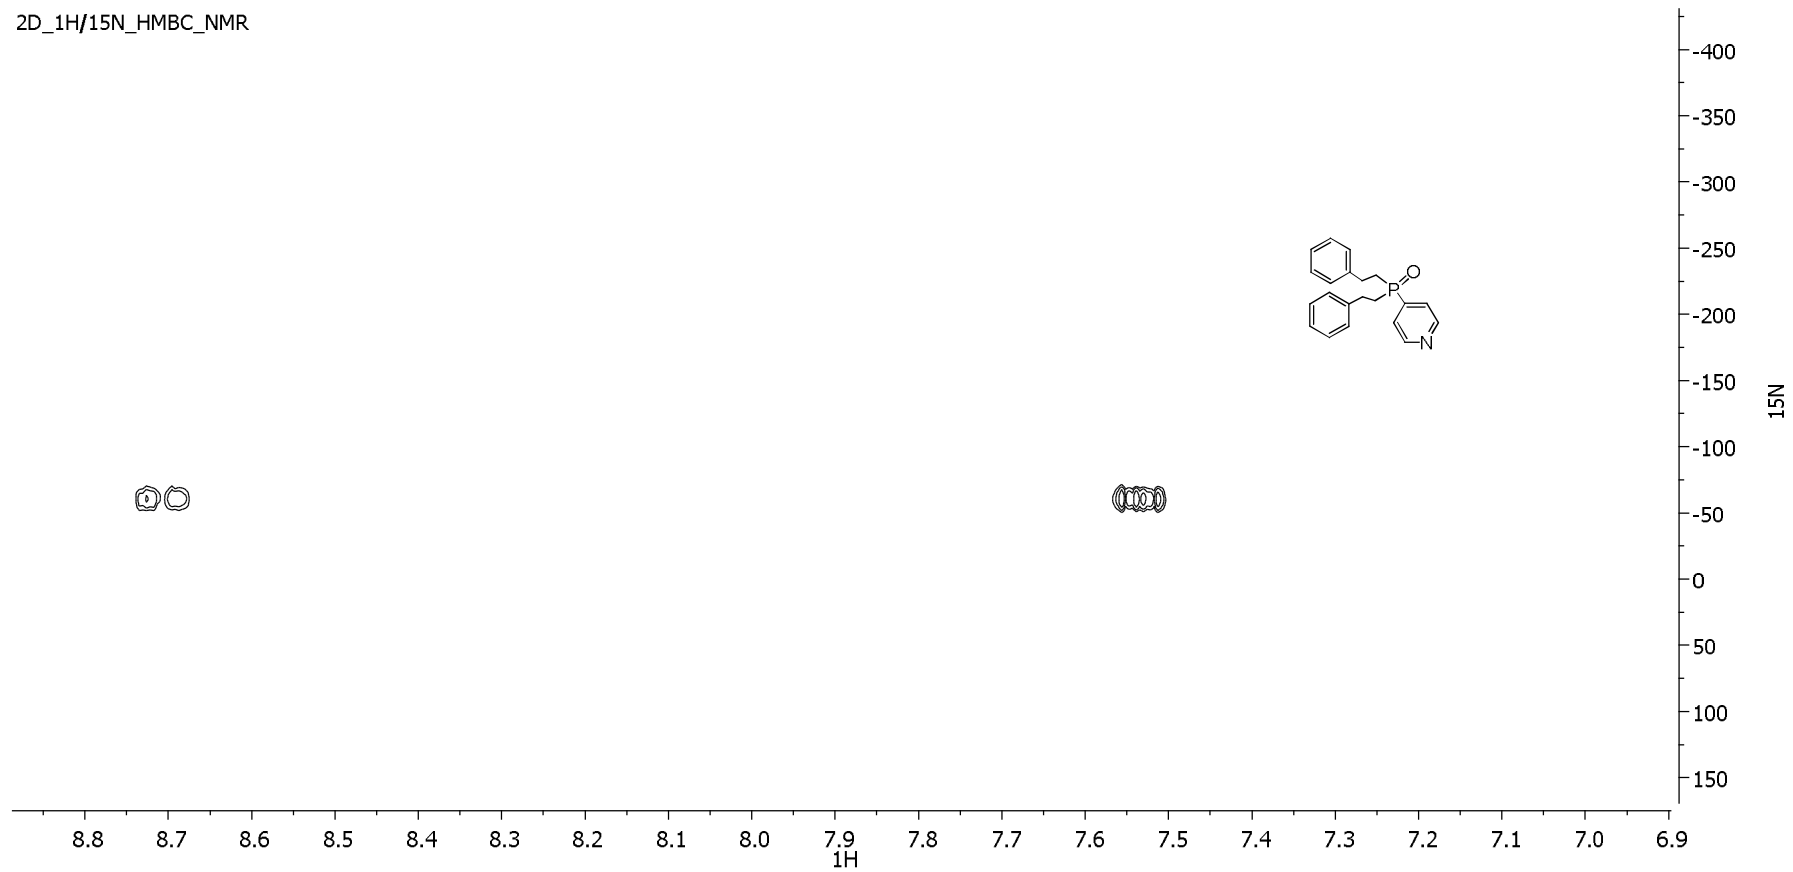

# 4-{Bis[2-(4-chlorophenyl)ethyl]phosphoryl}pyridine (4c)

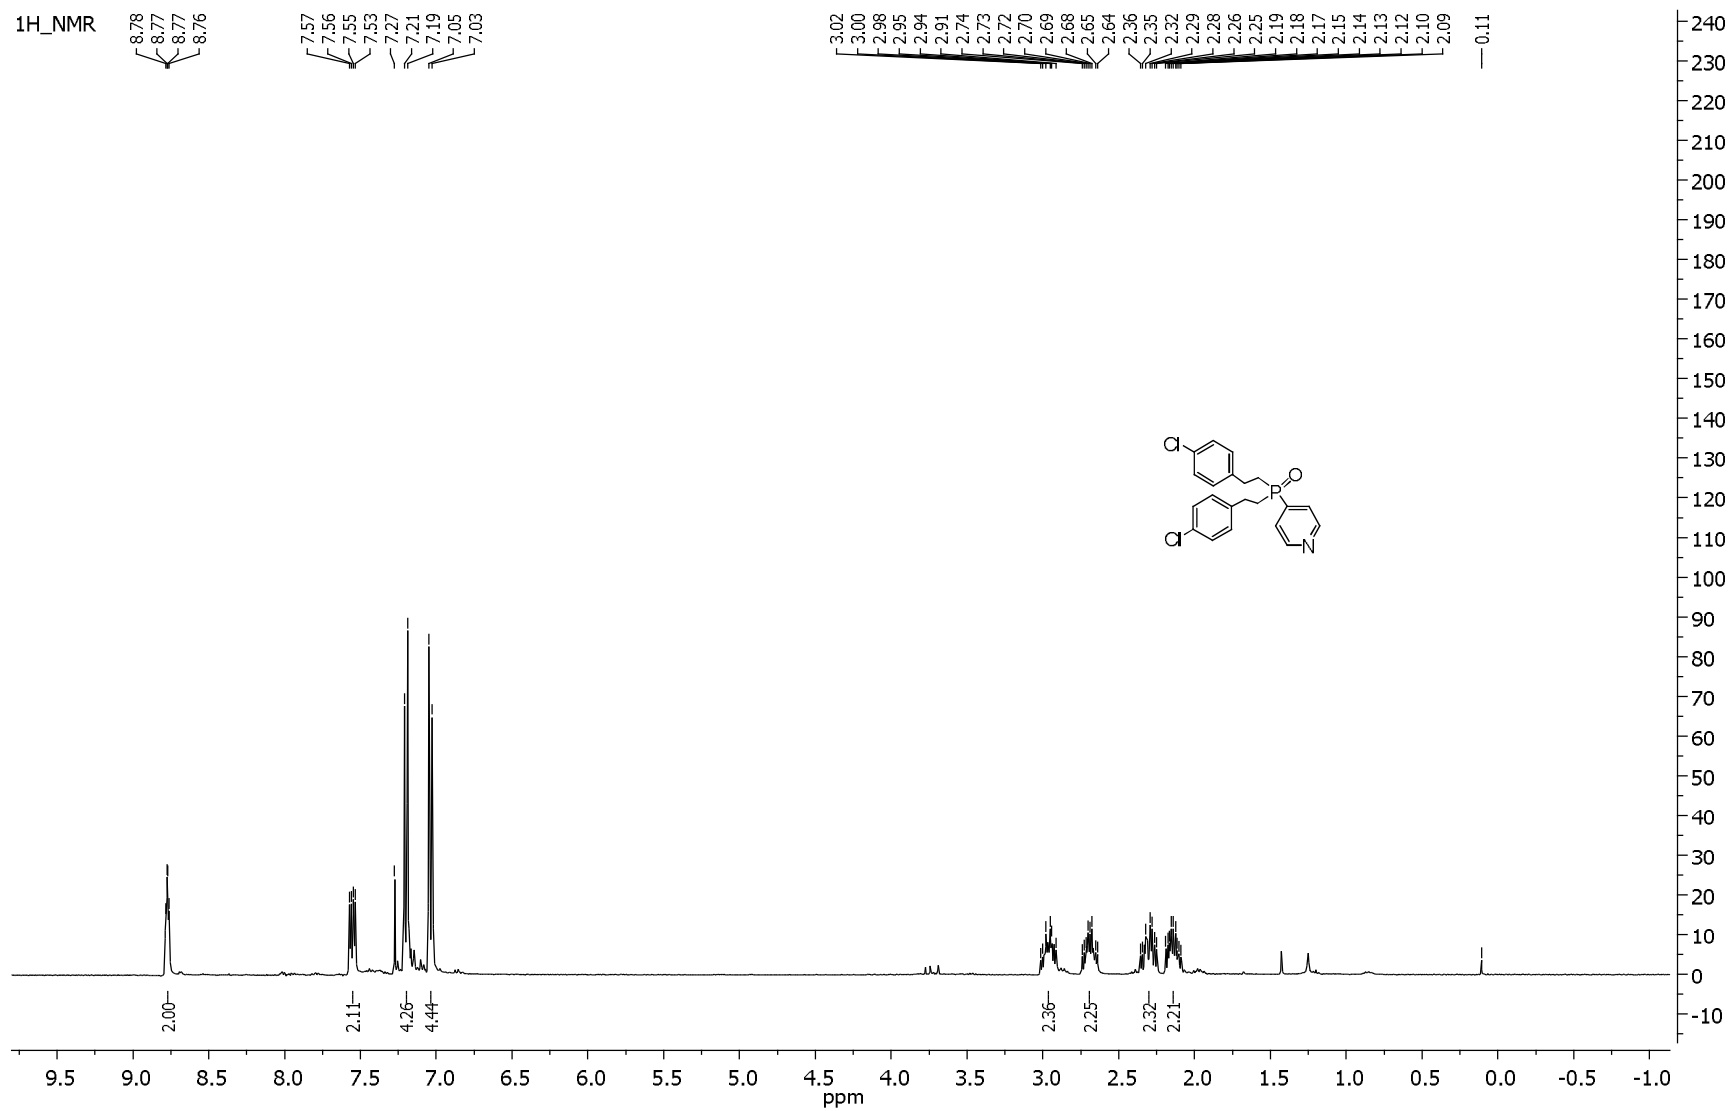

# 4-{Bis[2-(4-chlorophenyl)ethyl]phosphoryl}pyridine (4c)

<sup>13</sup>C\_NMR

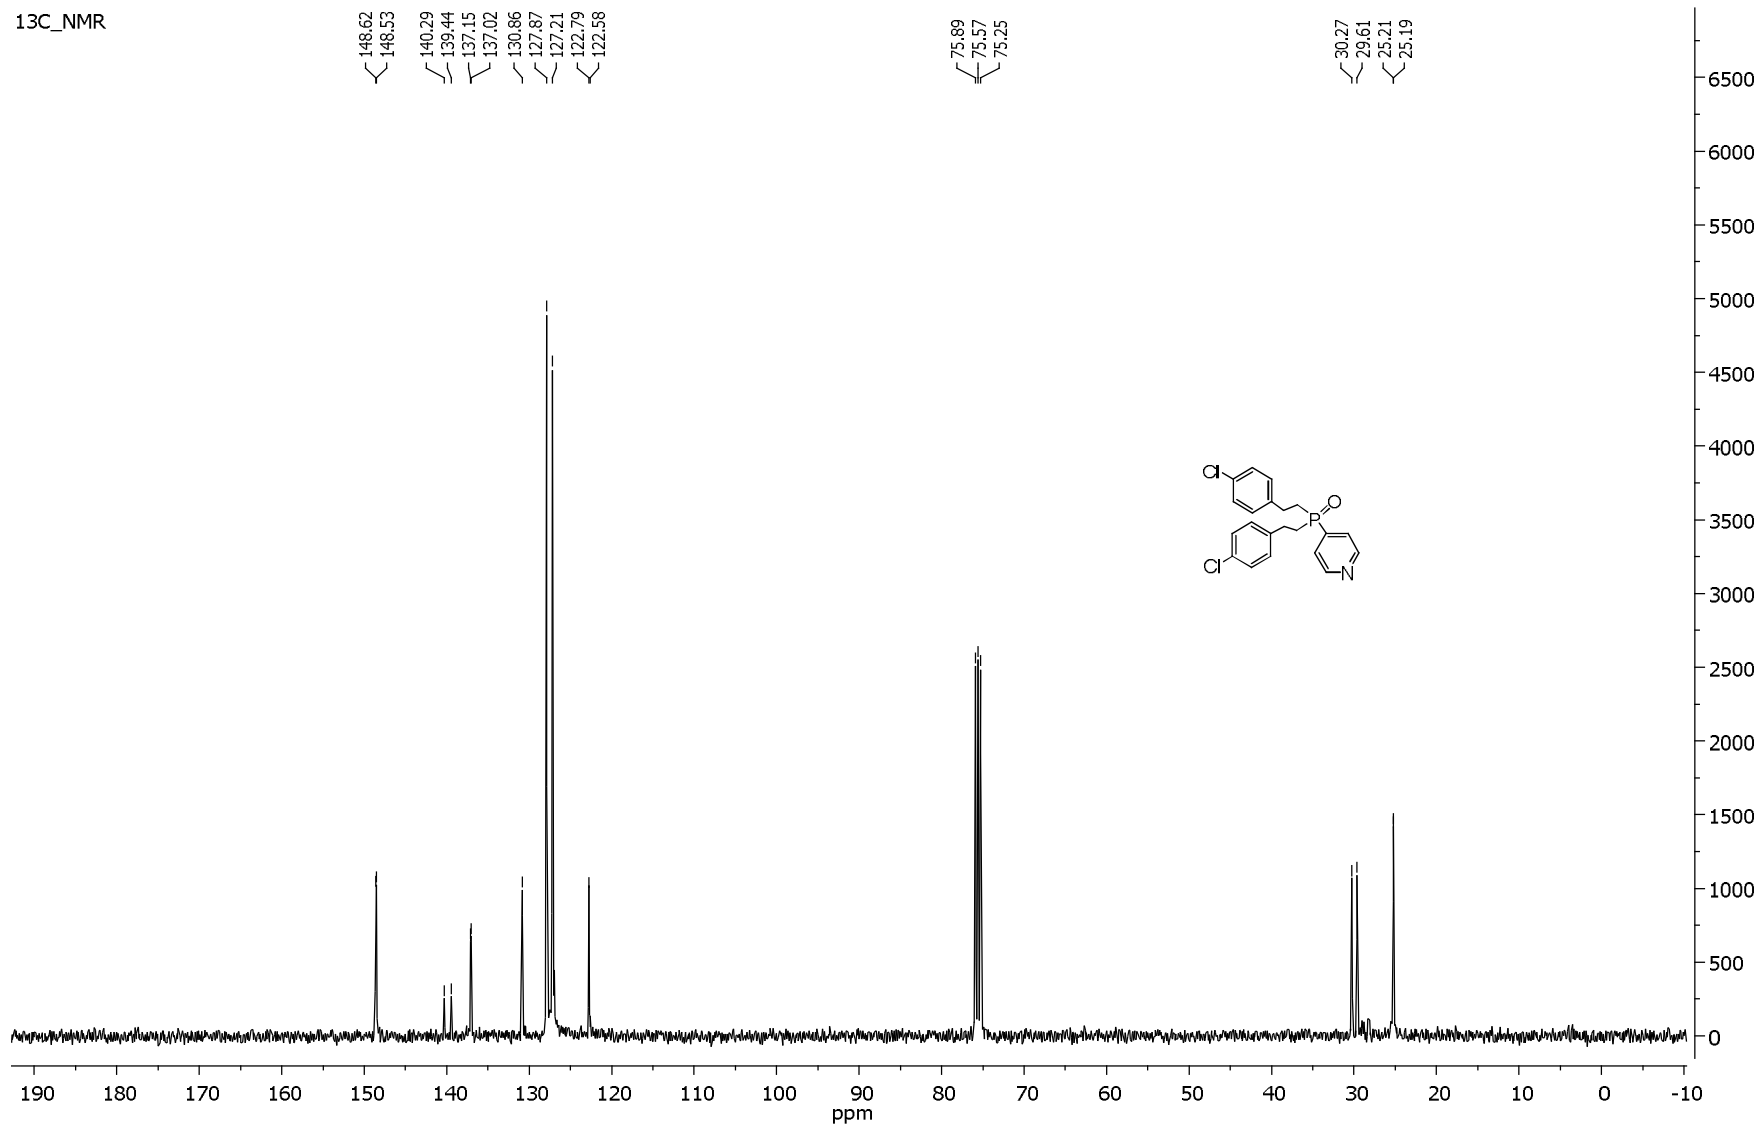

4-{Bis[2-(4-chlorophenyl)ethyl]phosphoryl}pyridine (4c)

31P\_NMR

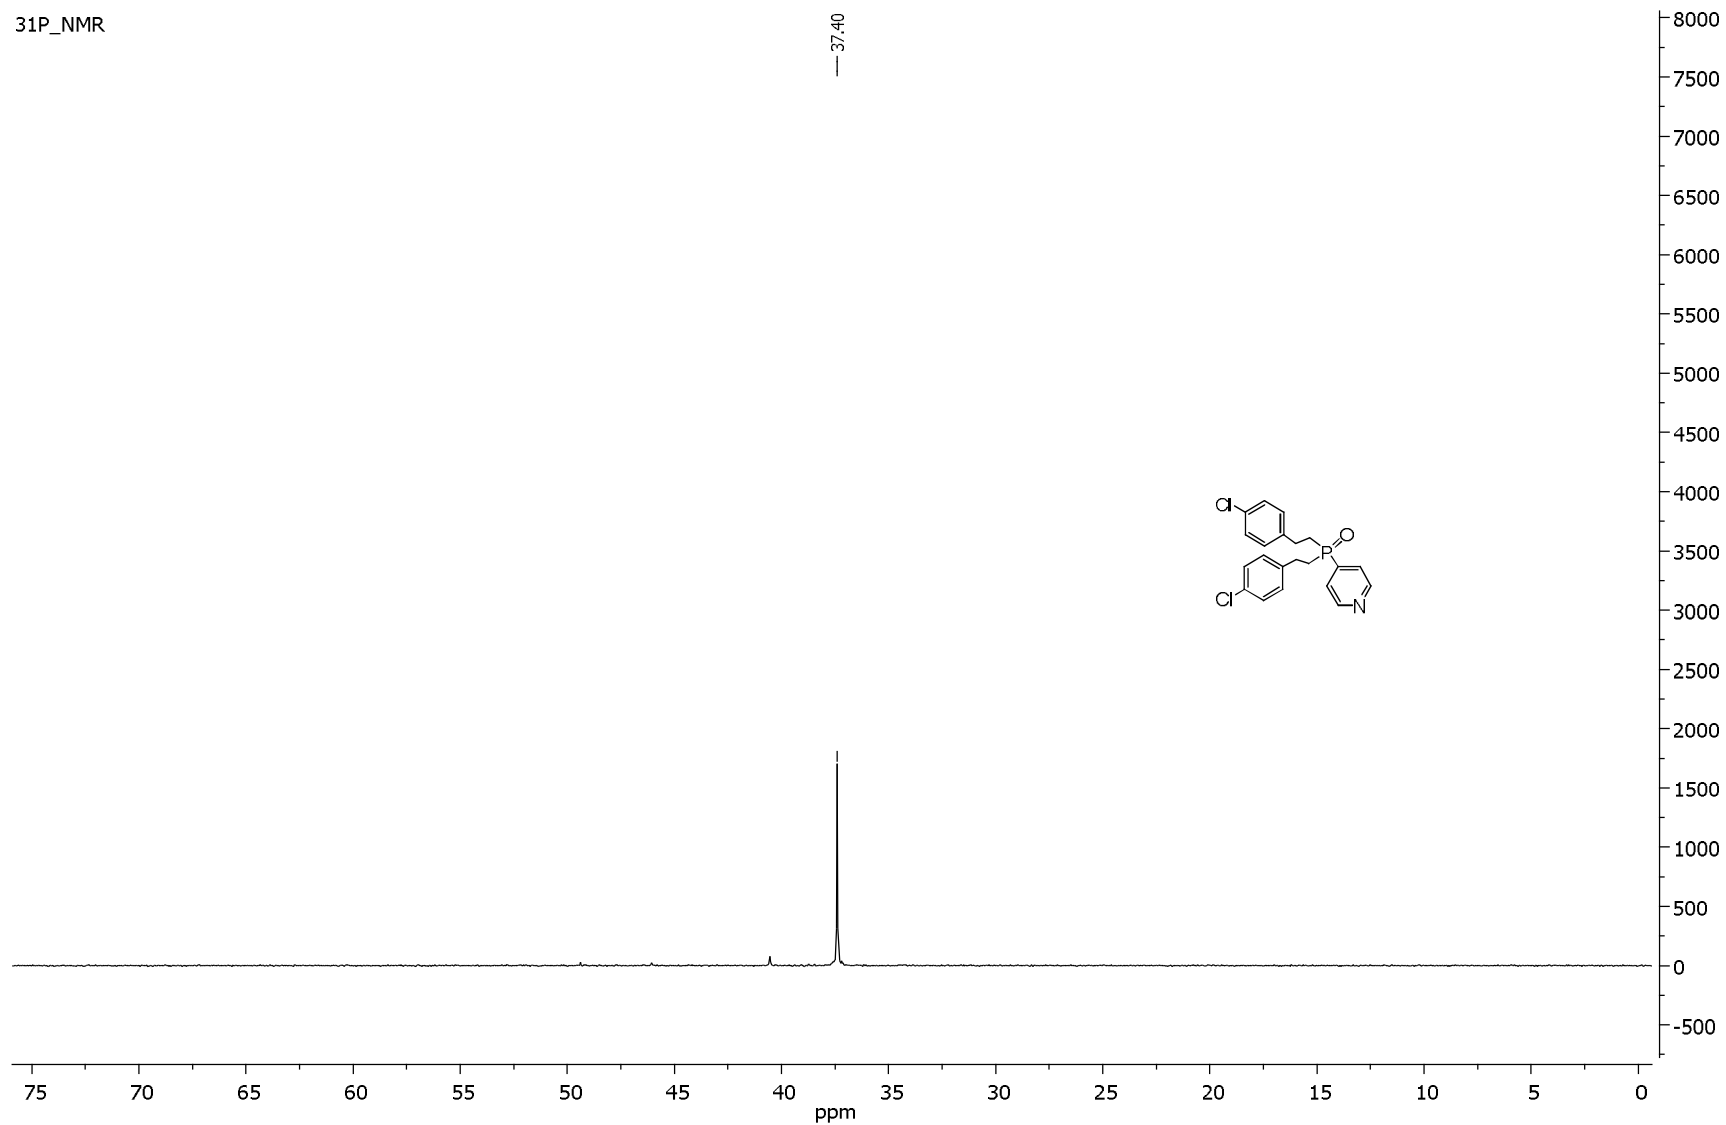

4-{Bis[2-(4-chlorophenyl)ethyl]phosphoryl}pyridine (4c)

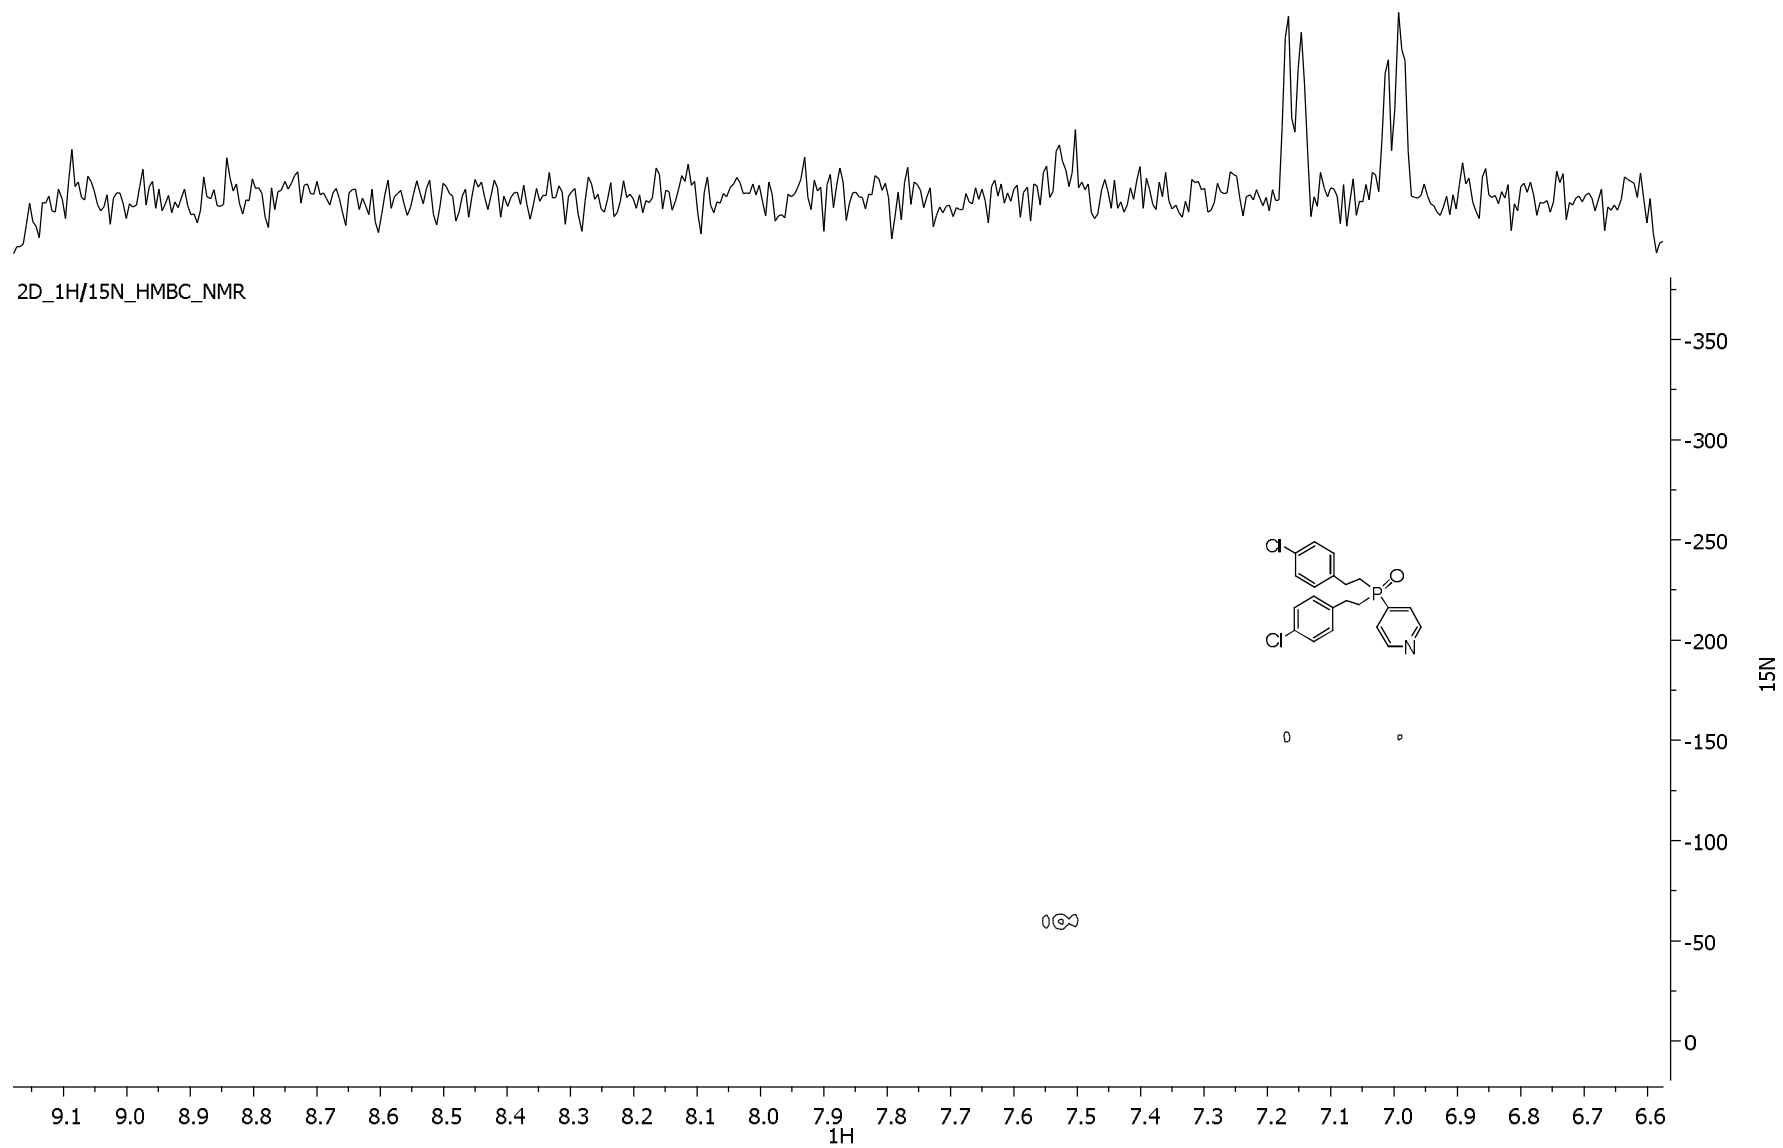

# 4-[Bis(2-phenylpropyl)phosphoryl]pyridine (4d)

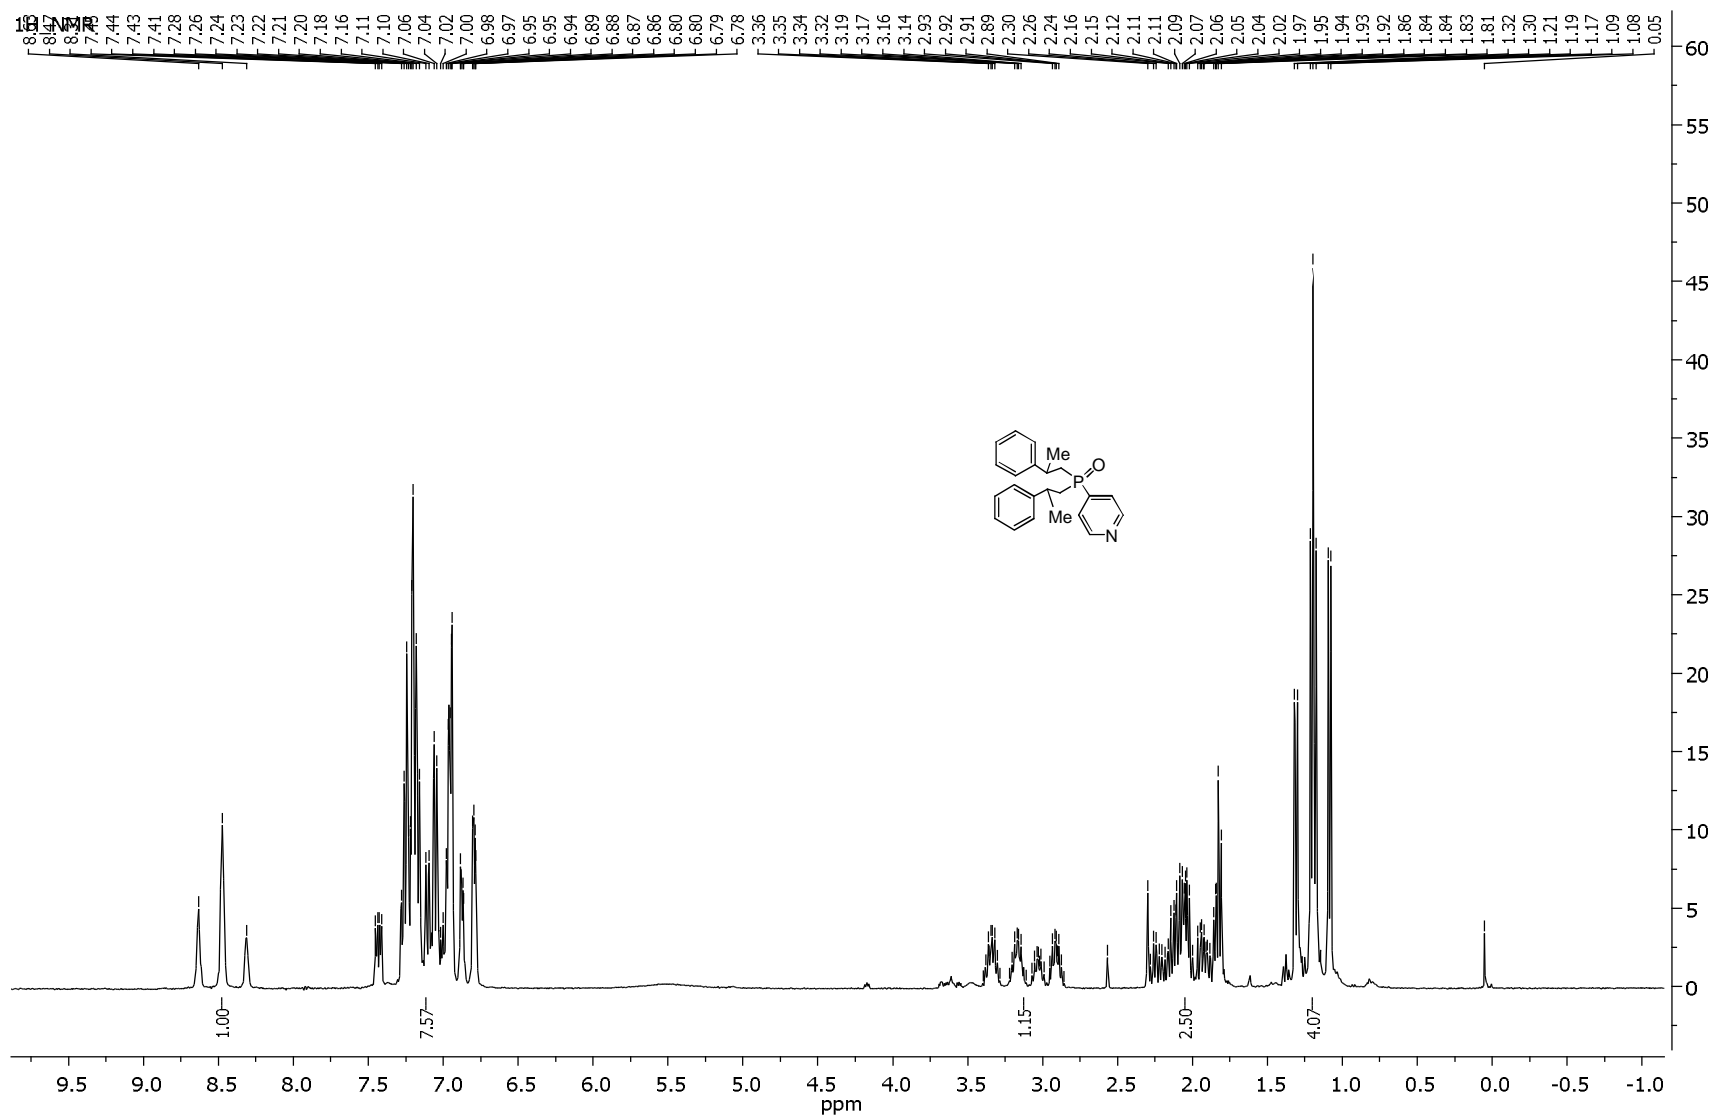

# 4-[Bis(2-phenylpropyl)phosphoryl]pyridine (4d)

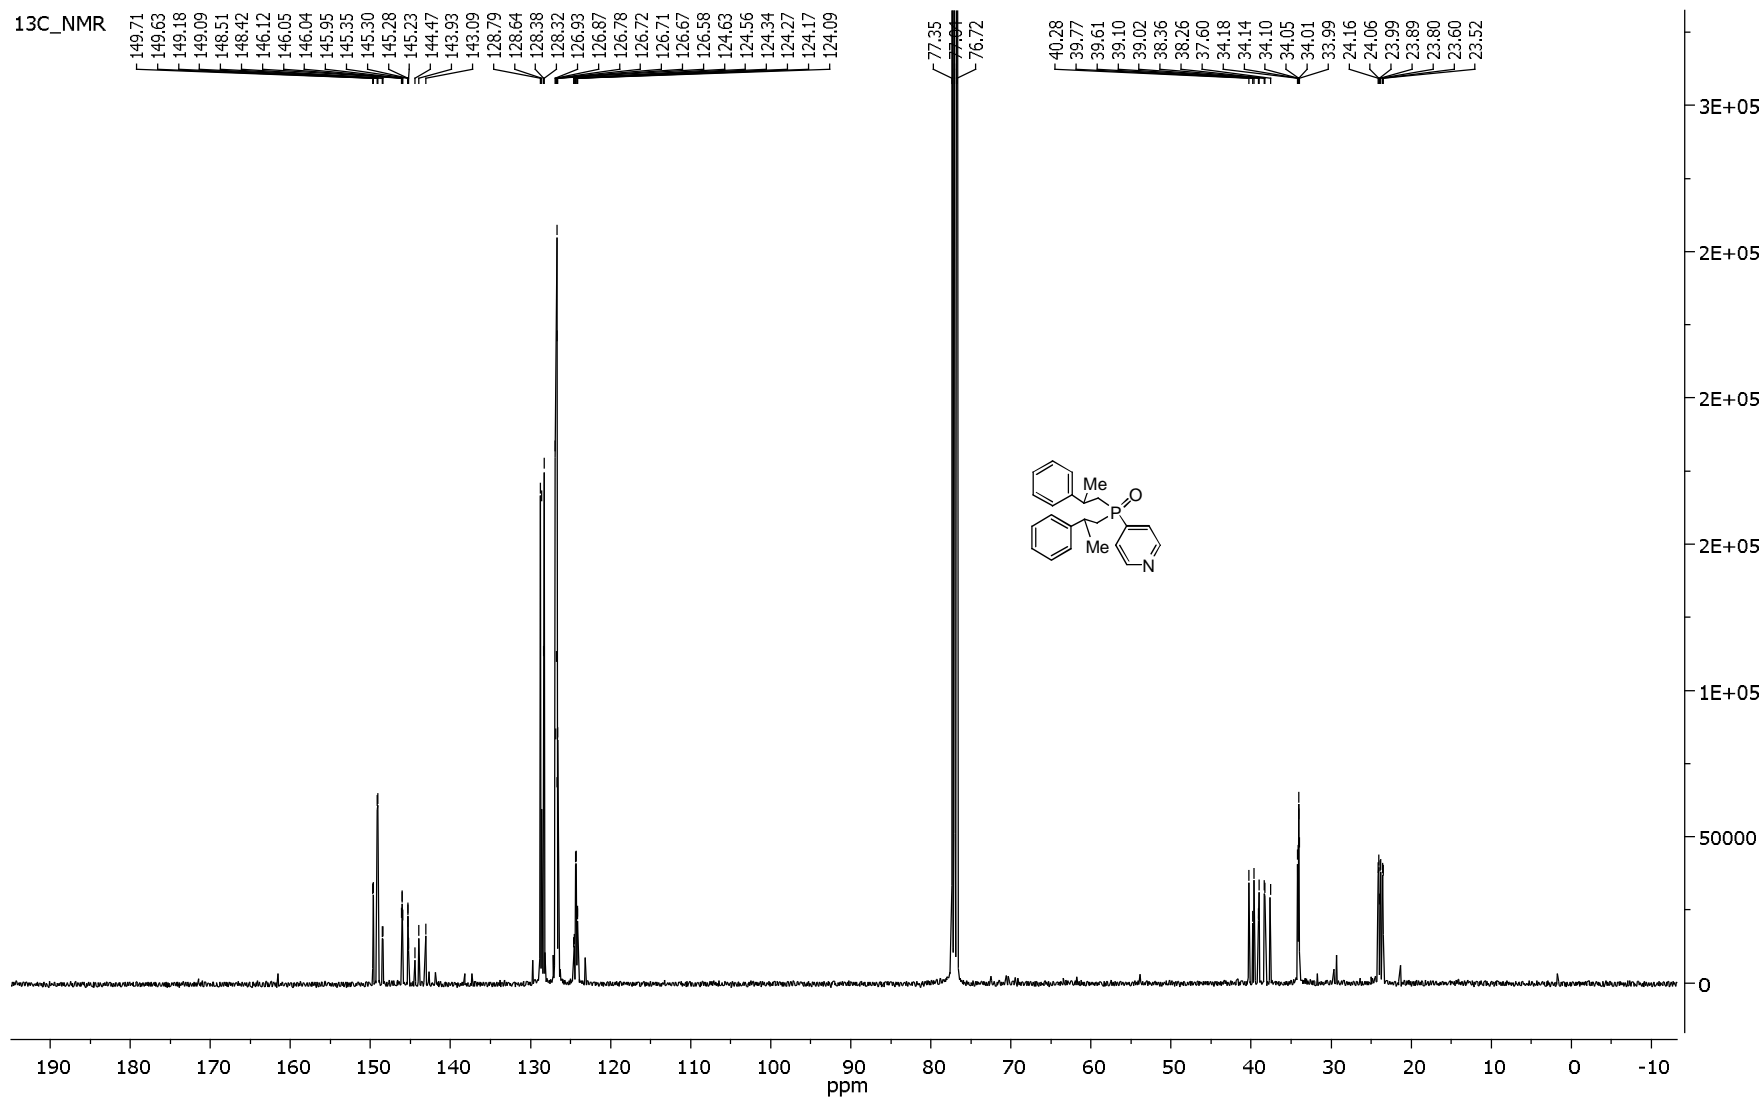

# 4-[Bis(2-phenylpropyl)phosphoryl]pyridine (4d)

31P\_NMR

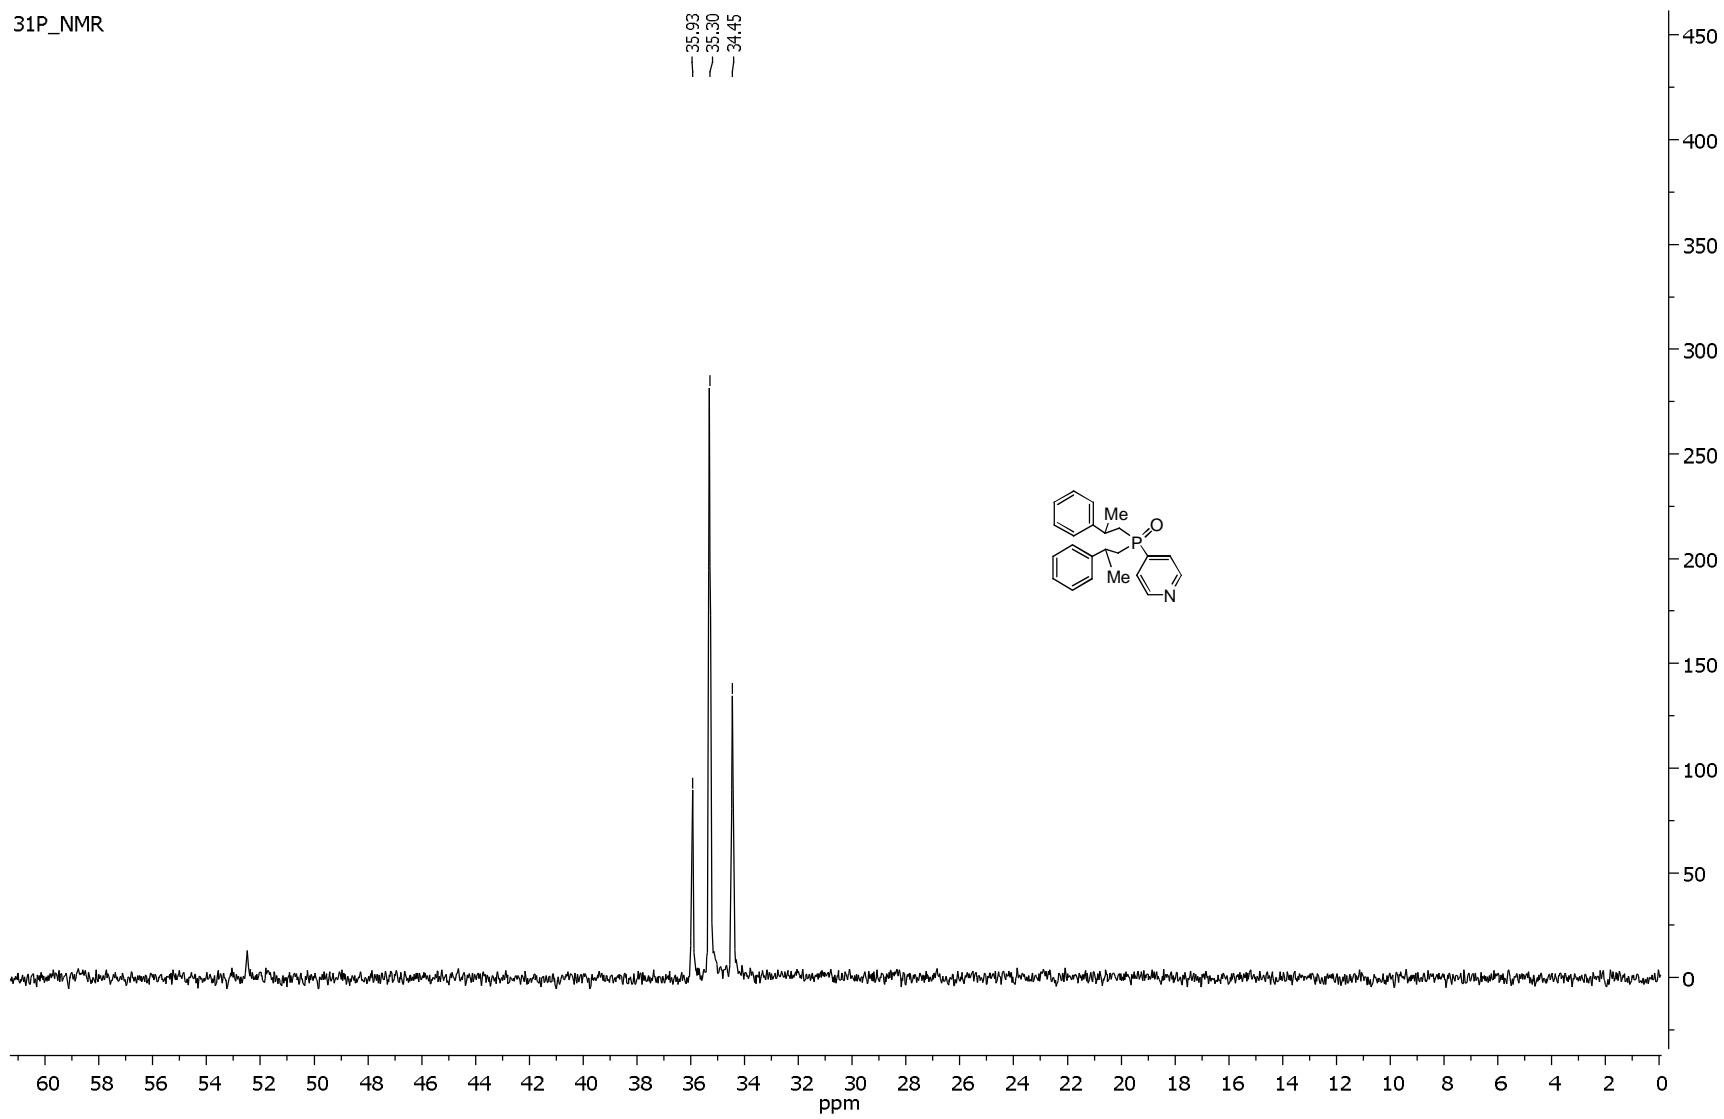



4-[Bis(2-phenylpropyl)phosphoryl]pyridine (4d)

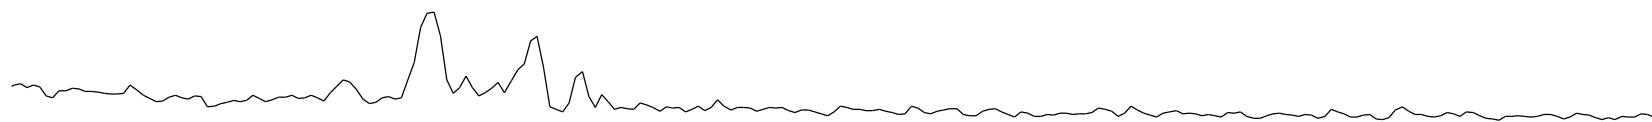

2D\_1H/13C\_HSQC\_NMR

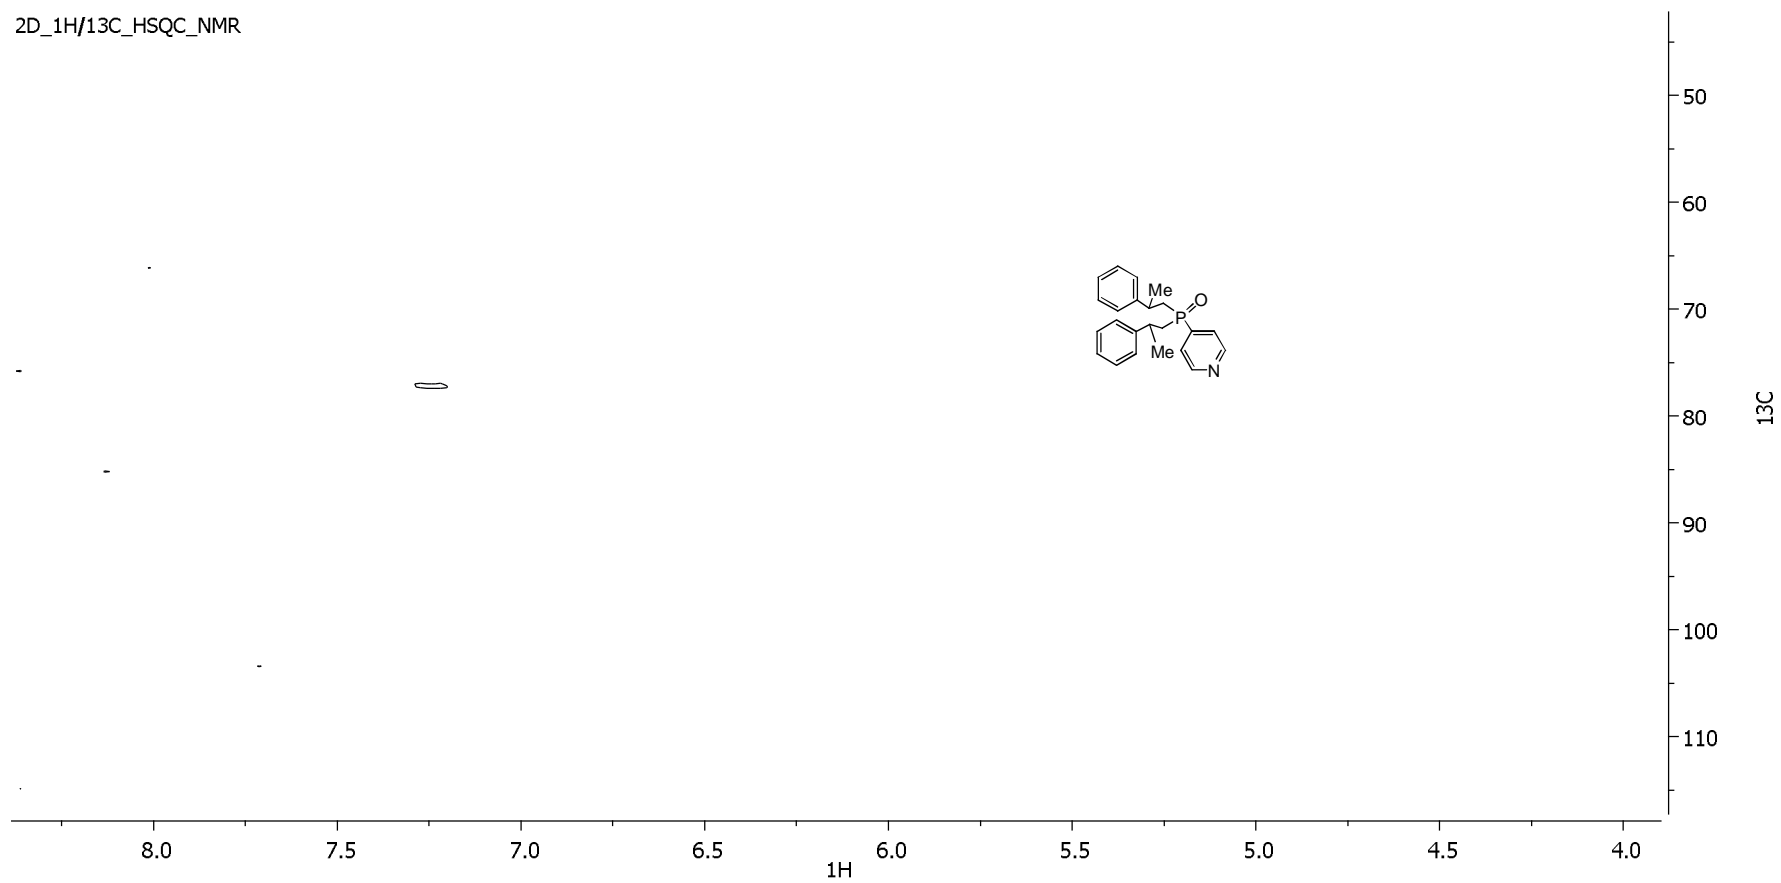

4-[Bis(2-phenylpropyl)phosphoryl]pyridine (4d)

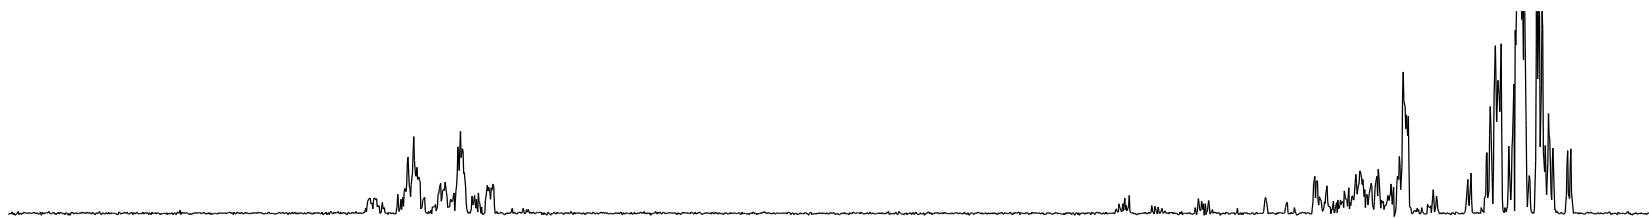

2D\_1H/13C\_HMBC\_NMR

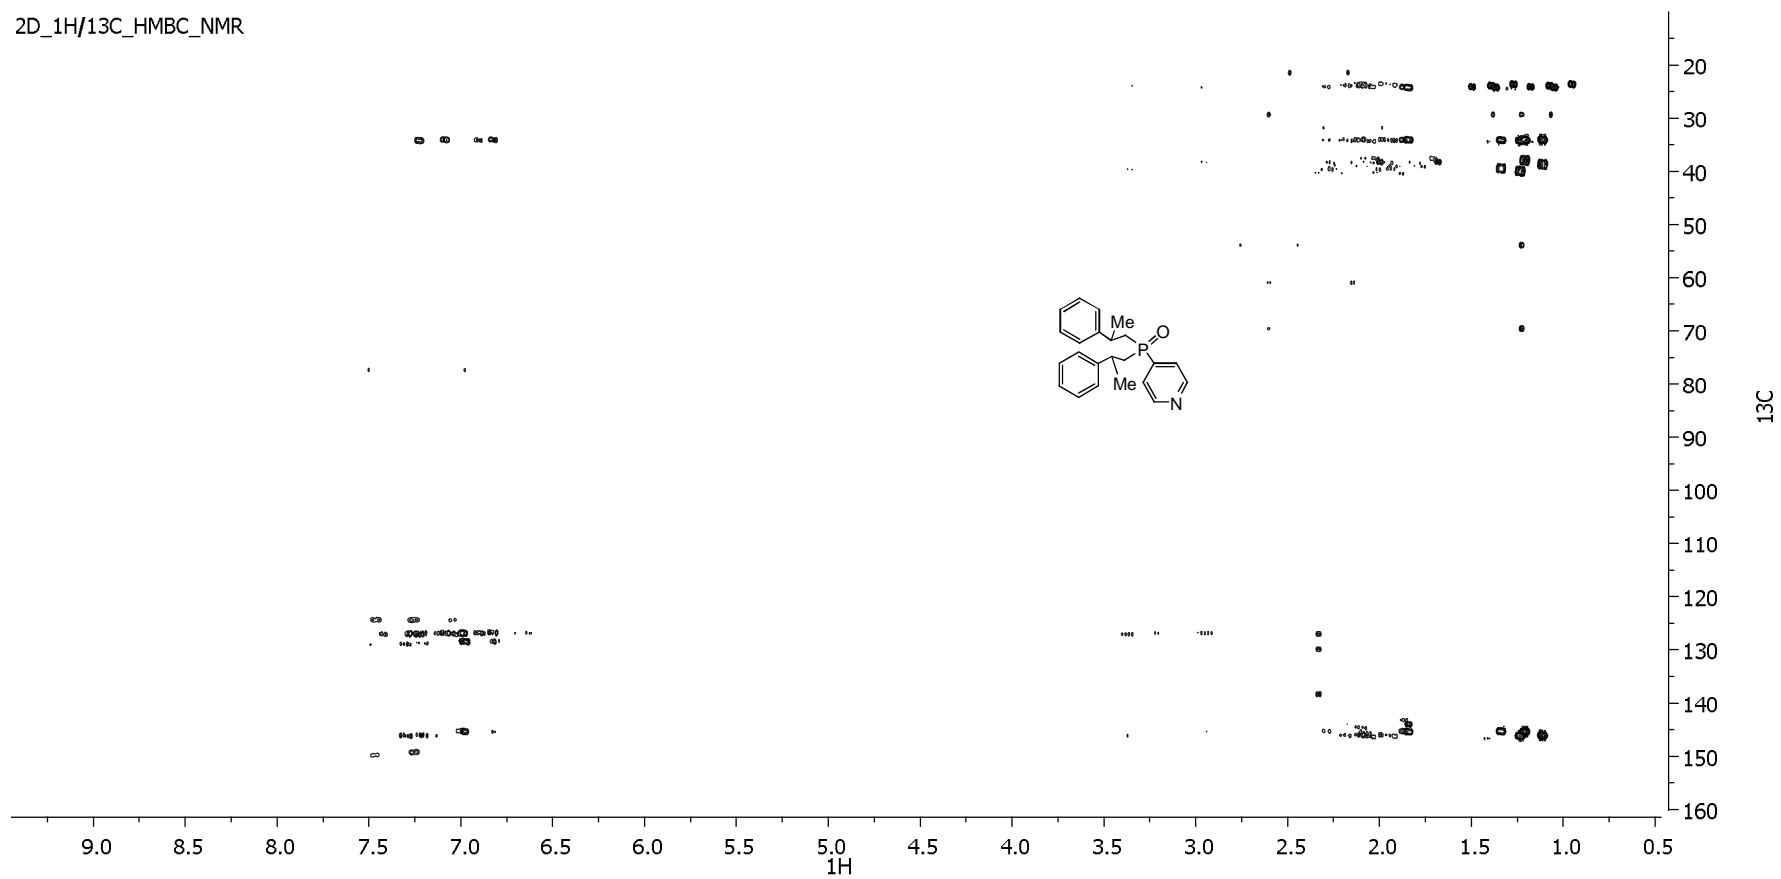

# 4-(Diphenylphosphorothioyl)pyridine (4e)

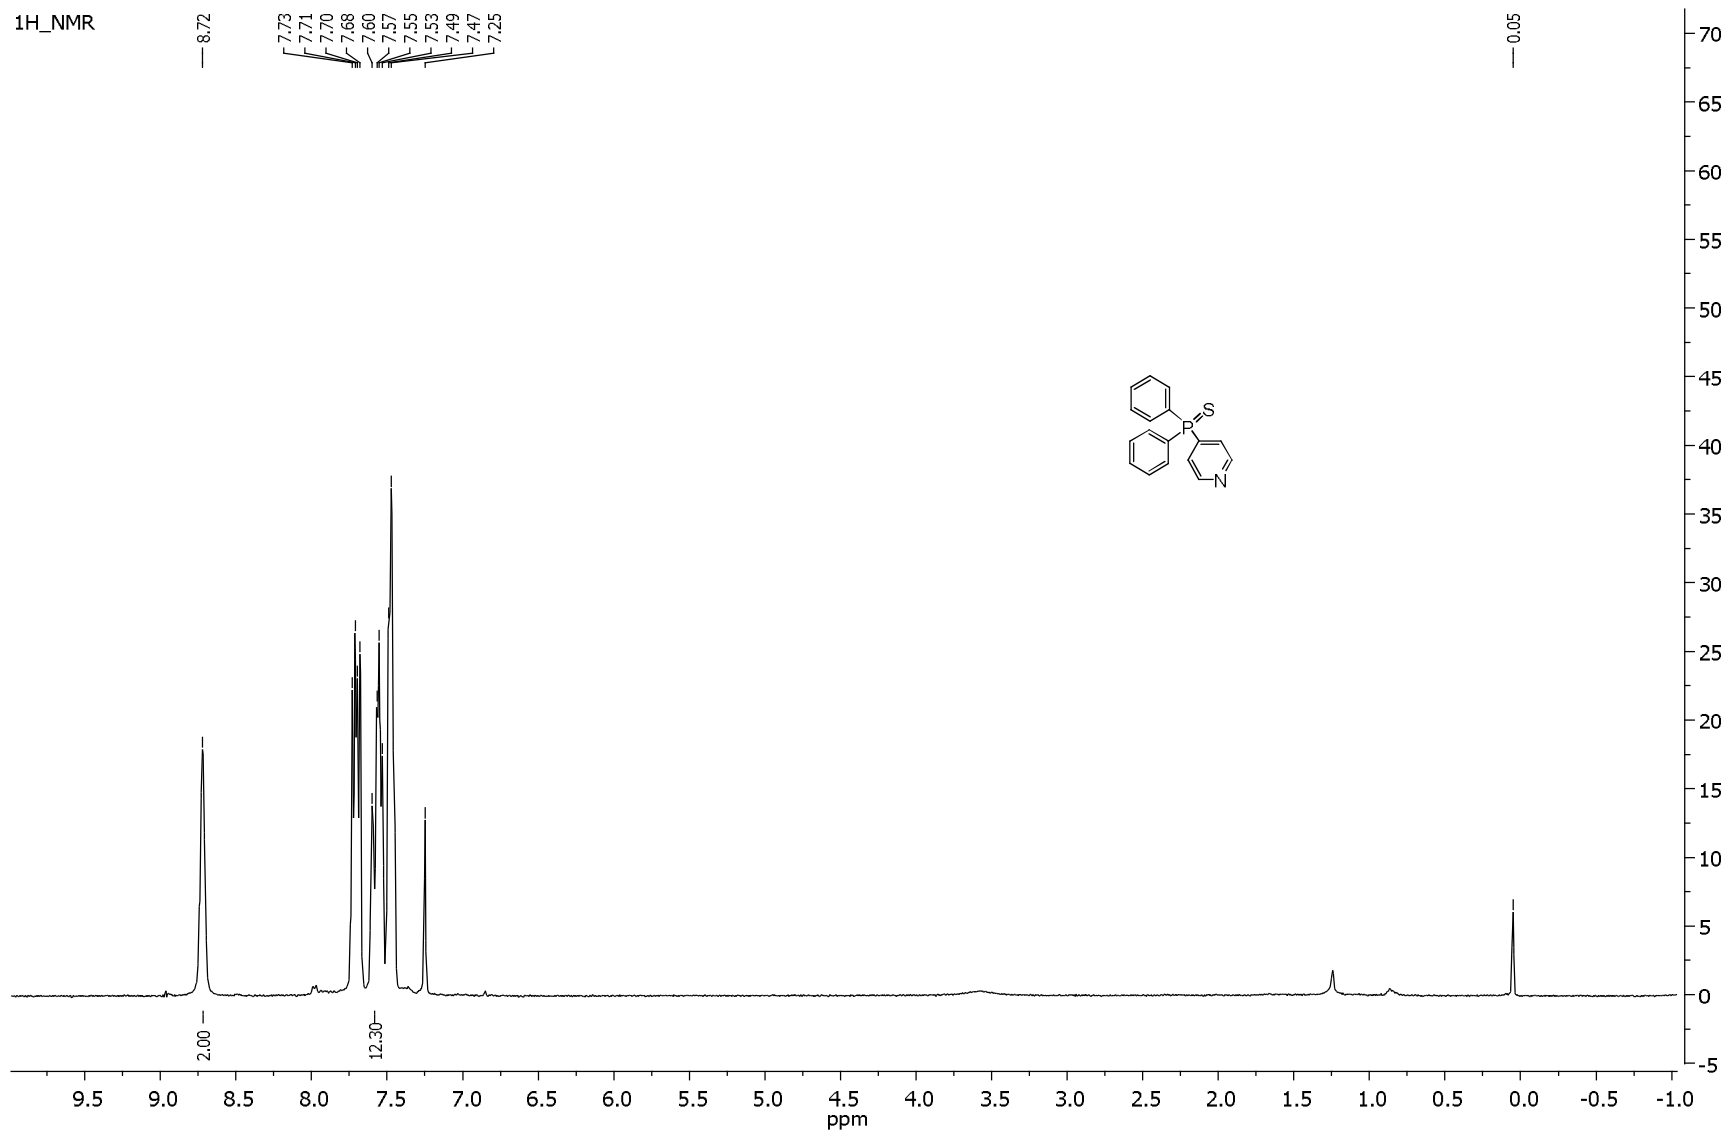

# 4-(Diphenylphosphorothioyl)pyridine (4e)

<sup>13</sup>C\_NMR

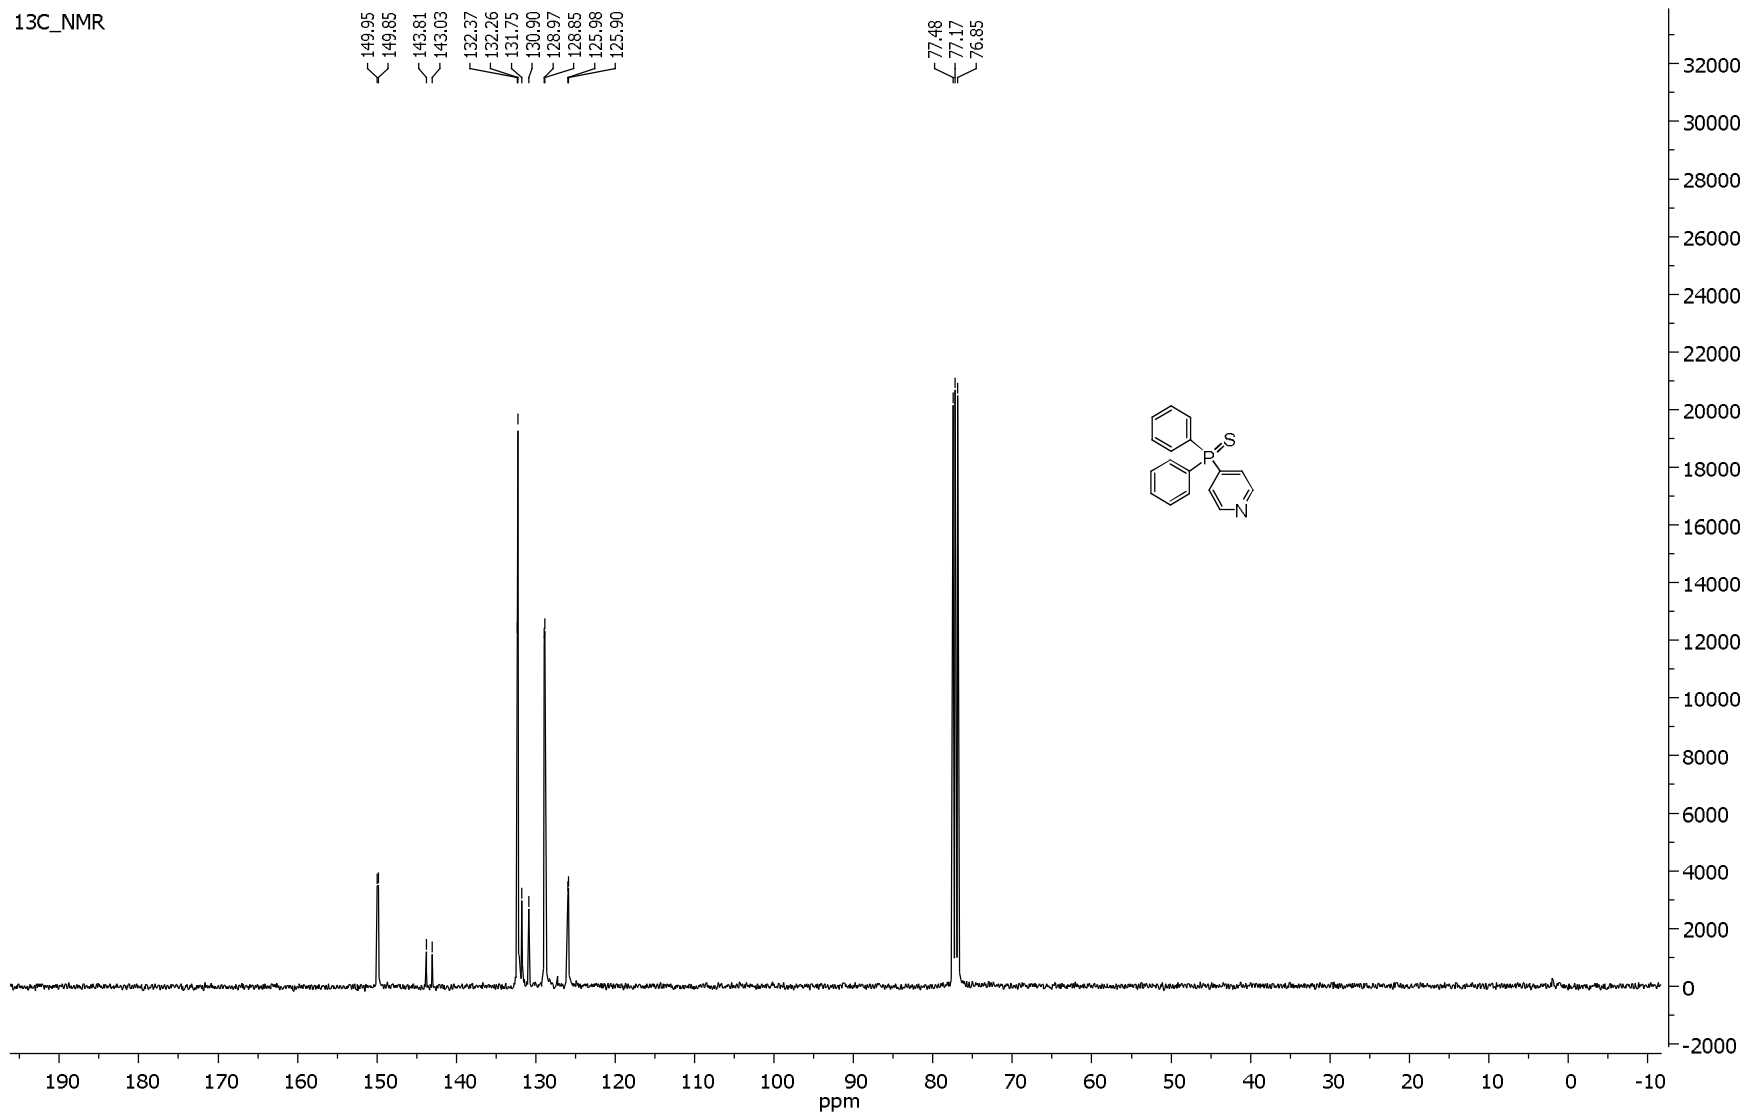

# 4-(Diphenylphosphorothioyl)pyridine (4e)

31P\_NMR

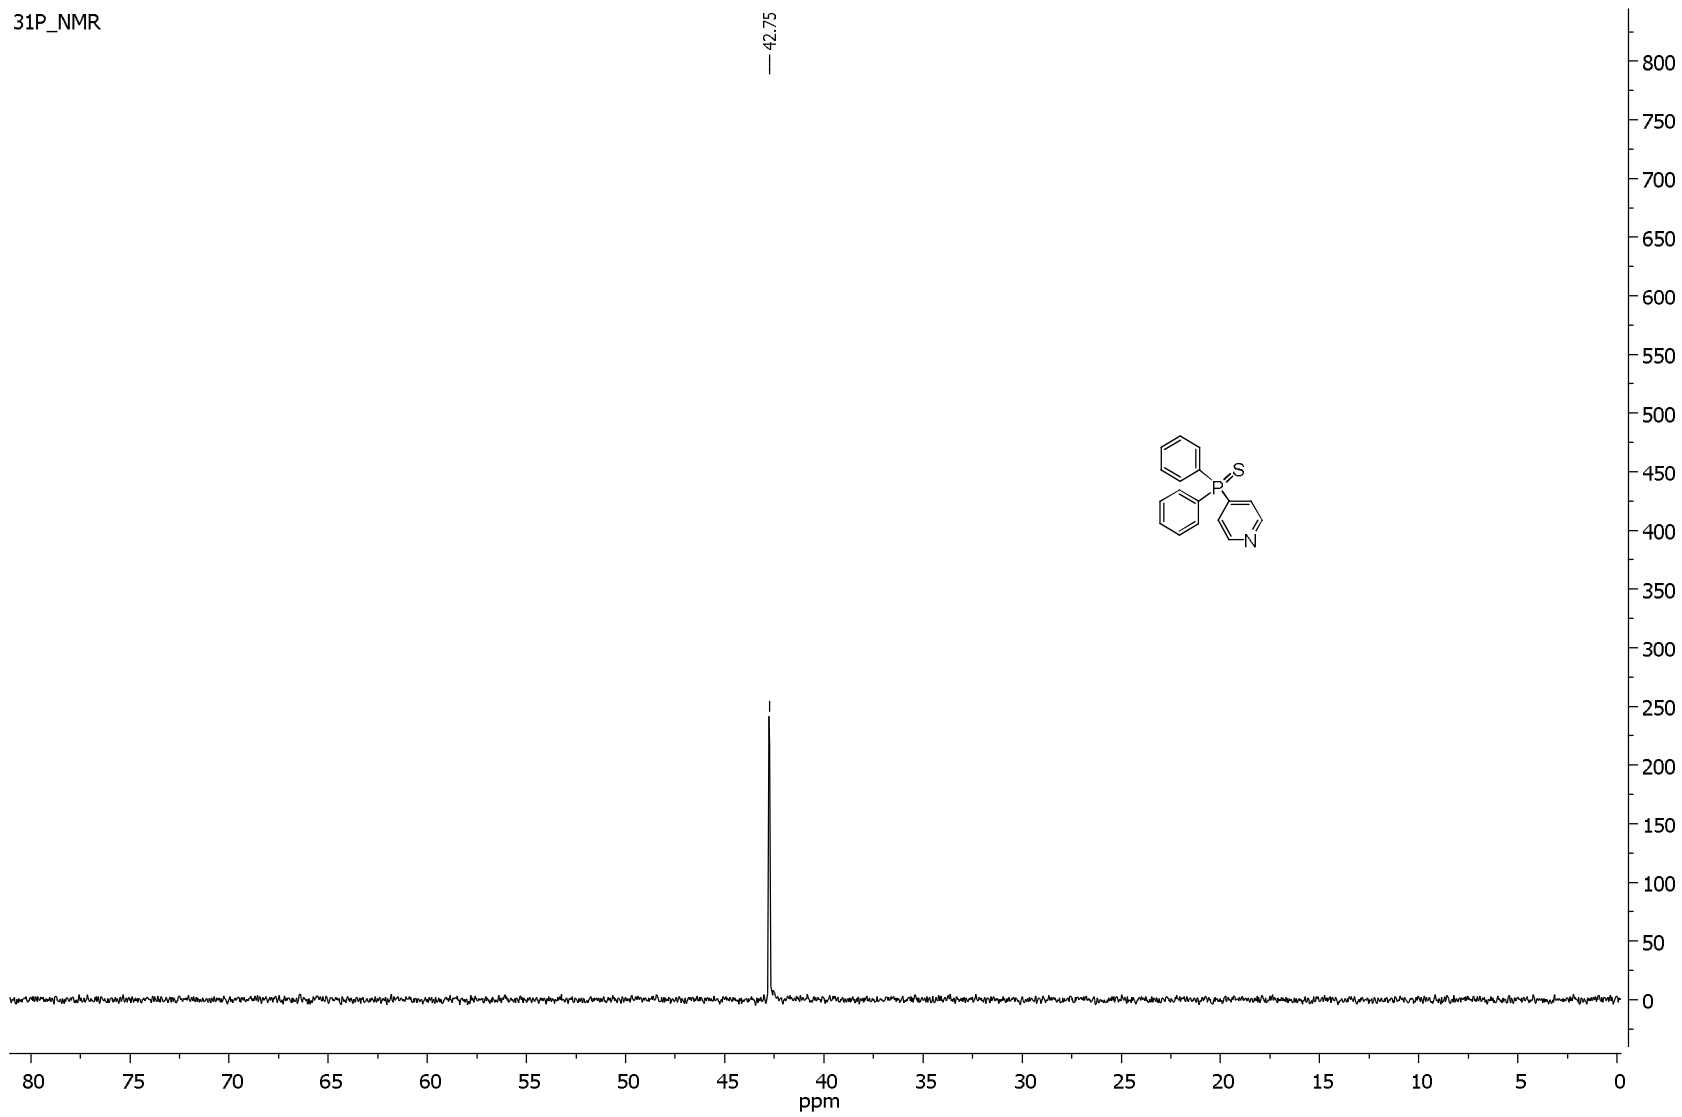

4-(Diphenylphosphorothioyl)pyridine (4e)

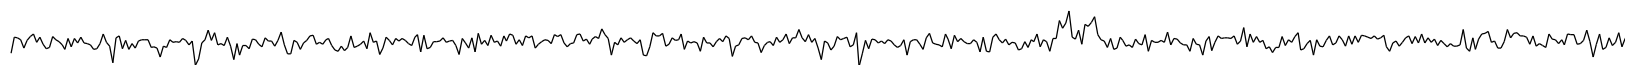

2D\_1H/15N\_HMBC\_NMR

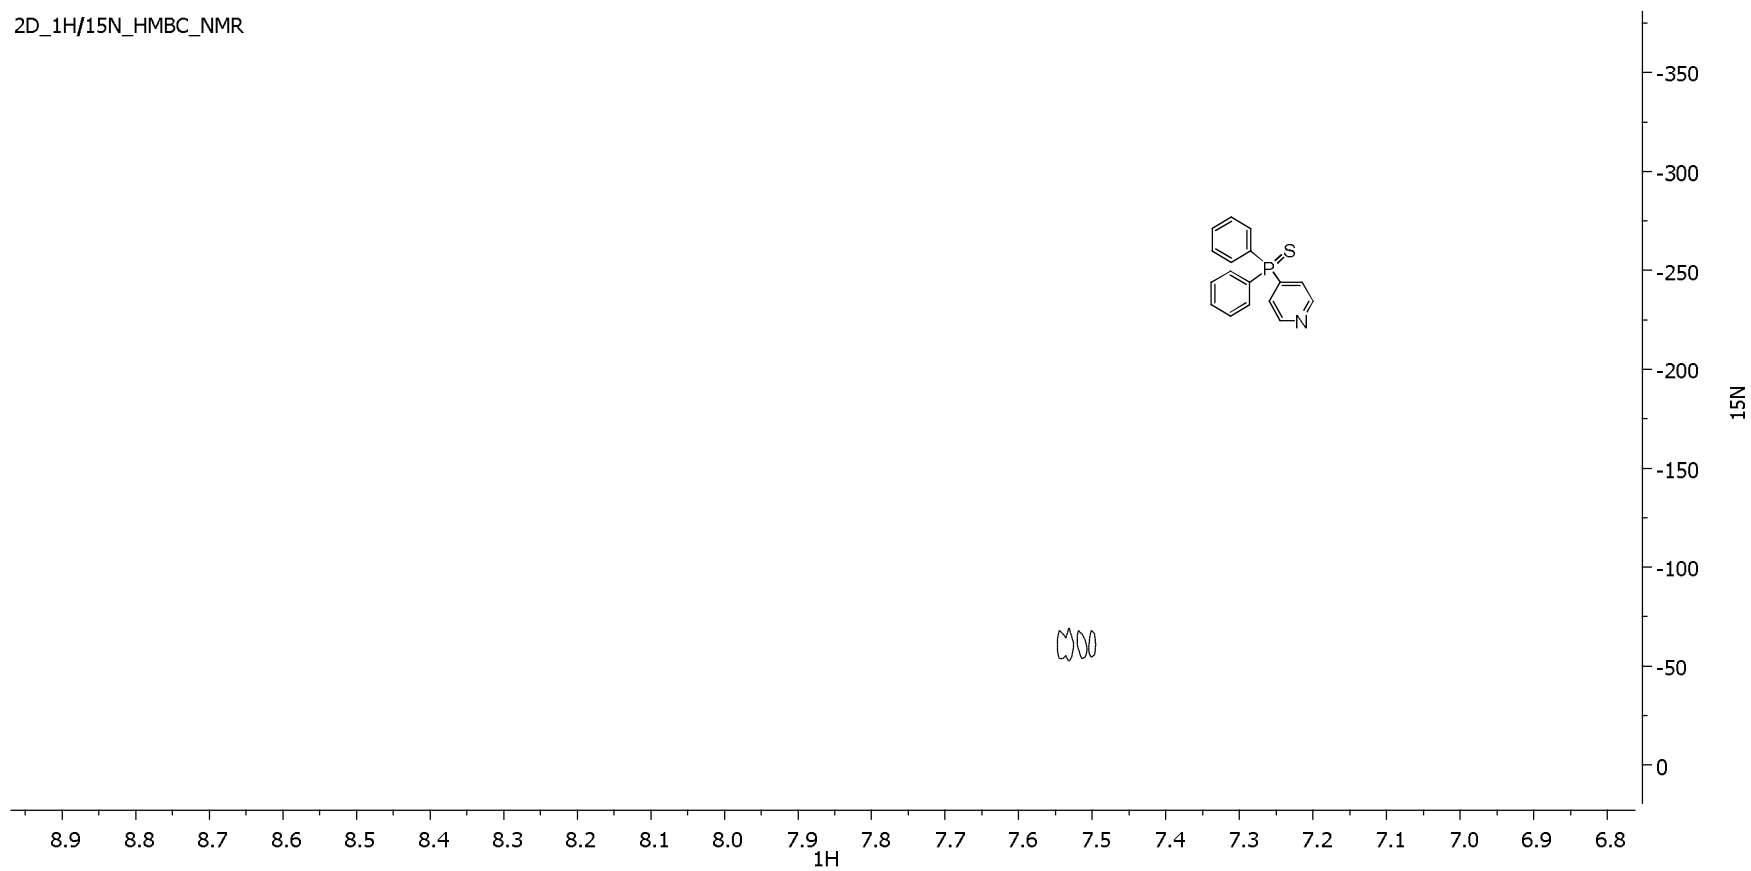

4-[Bis(2-phenylethyl)phosphorothioyl]pyridine (4f)

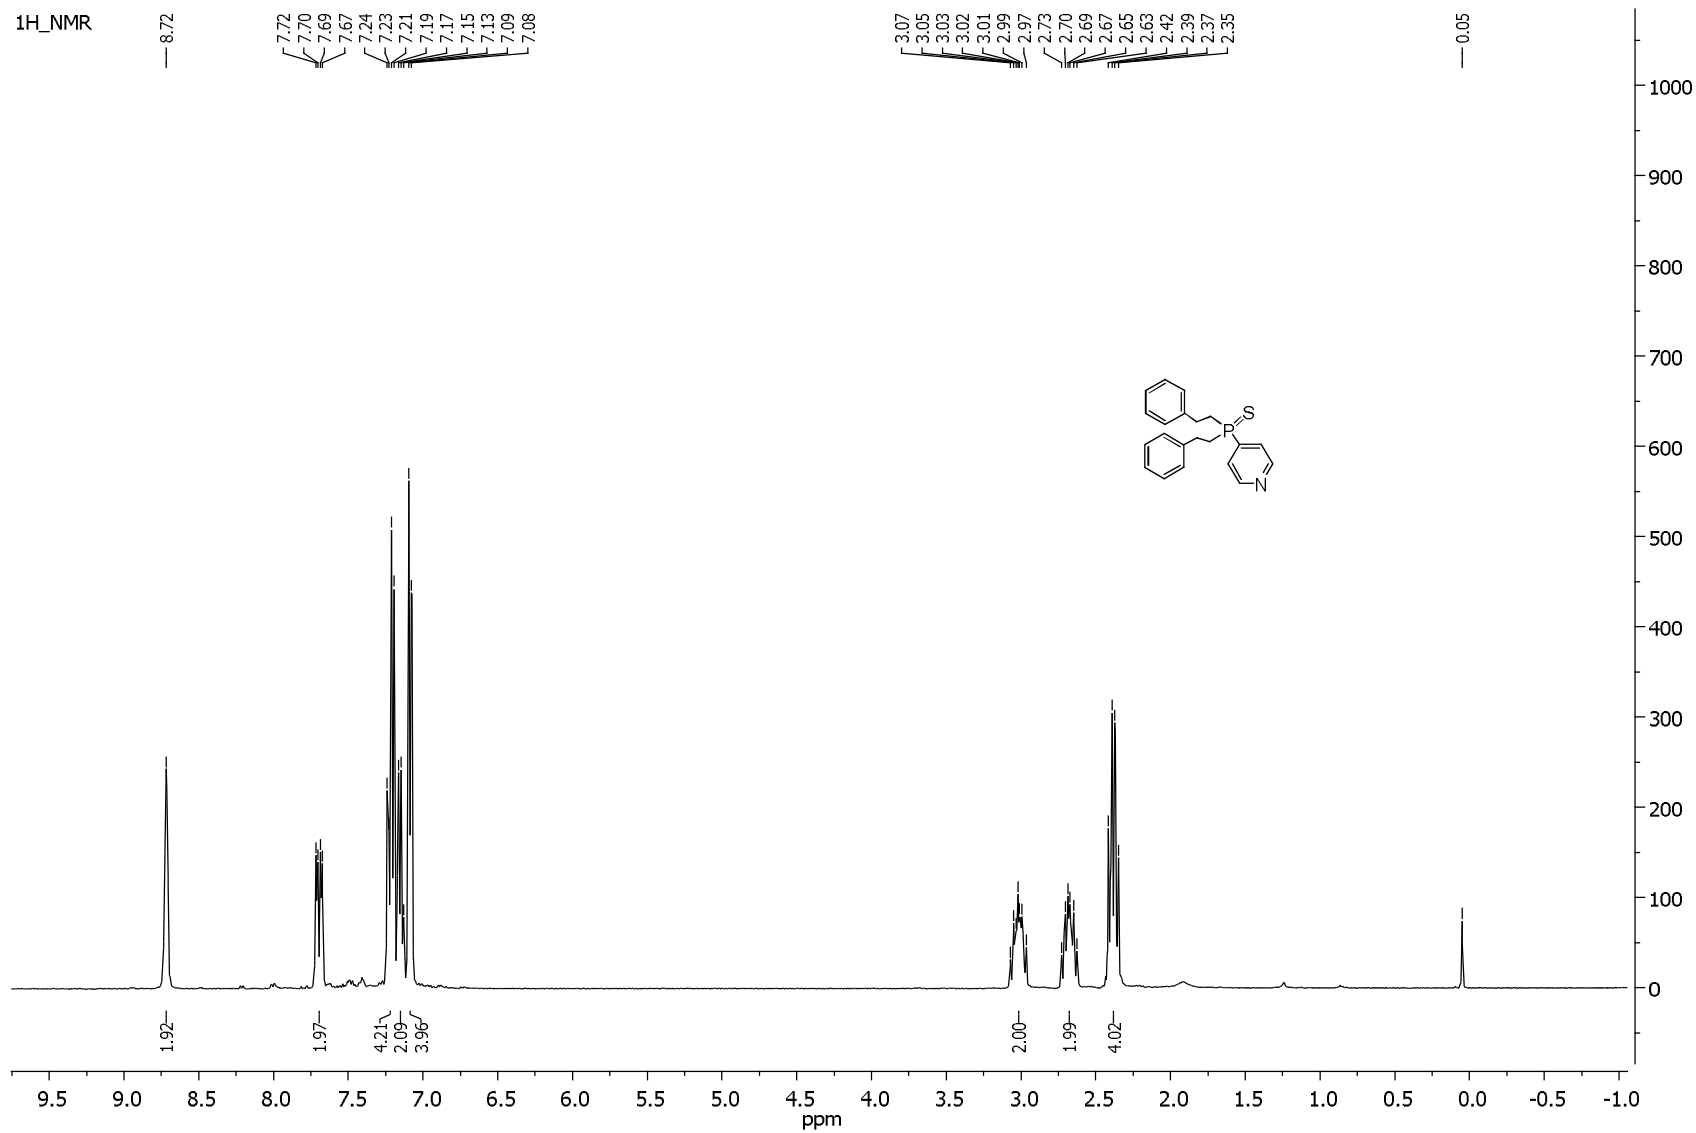

# 4-[Bis(2-phenylethyl)phosphorothioyl]pyridine (4f)

<sup>13</sup>C\_NMR

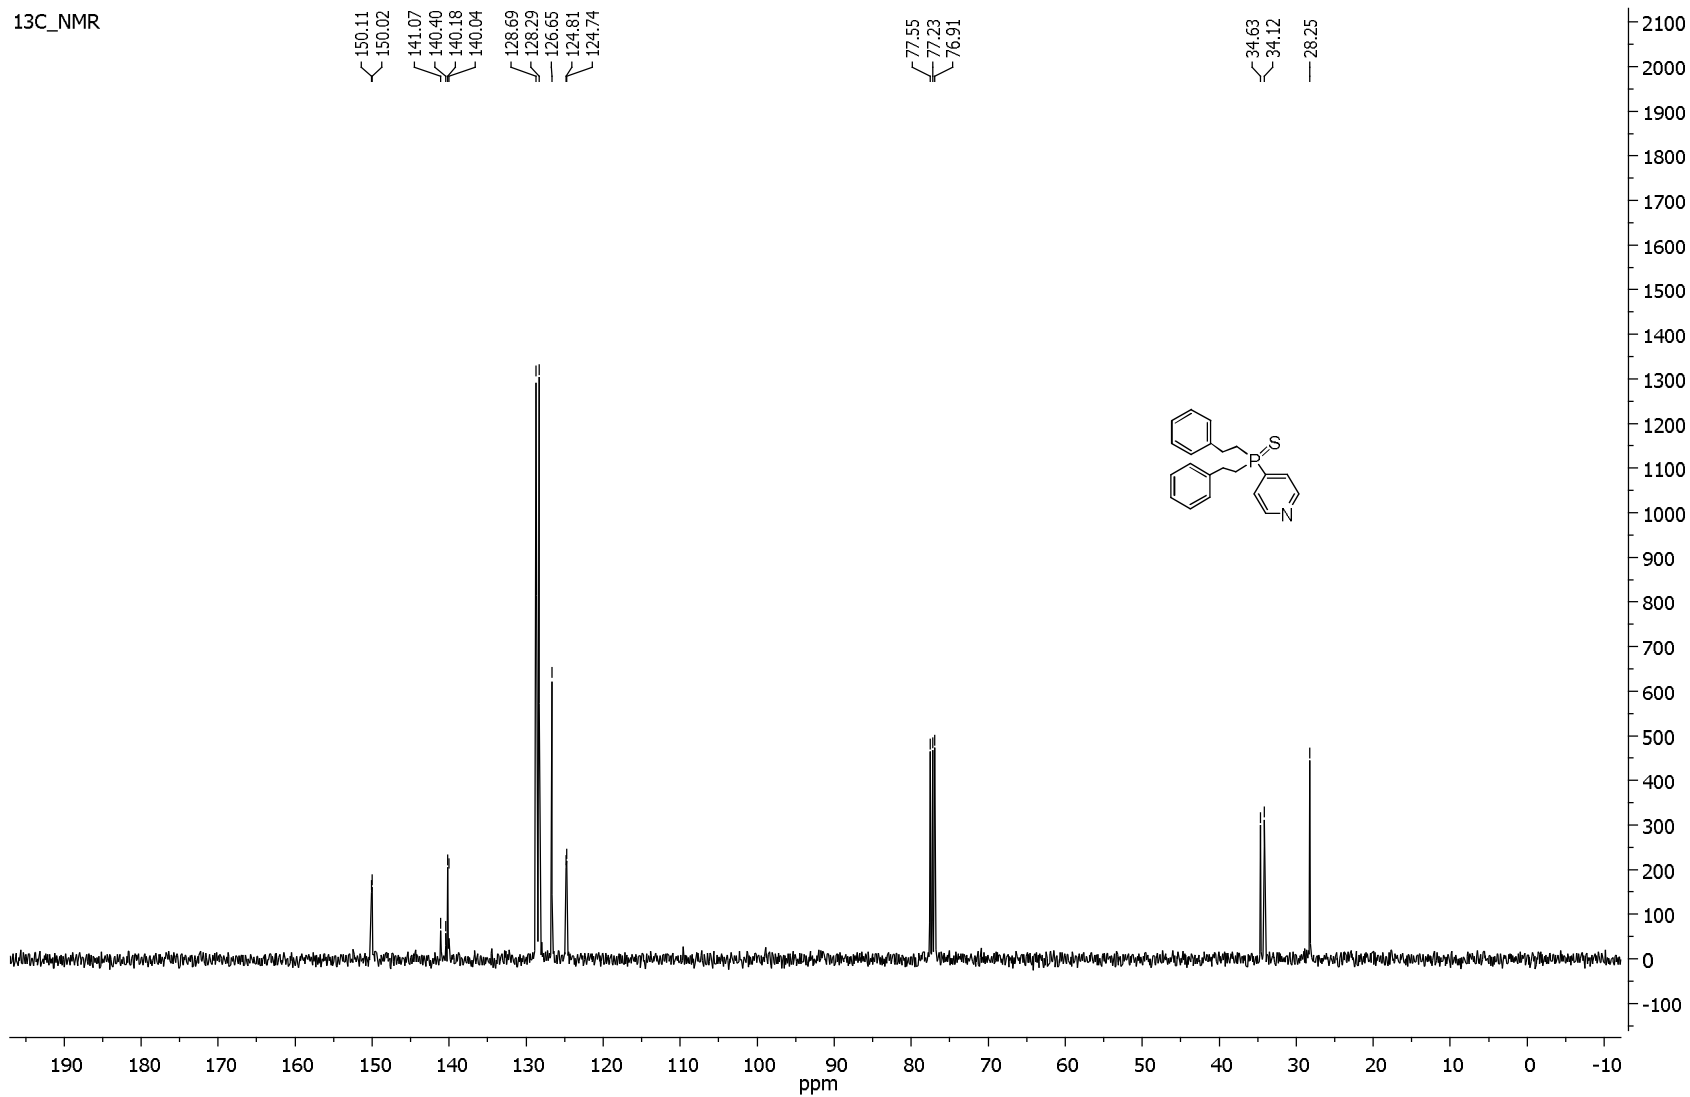



4-[Bis(2-phenylethyl)phosphorothioyl]pyridine (4f)

31P\_NMR

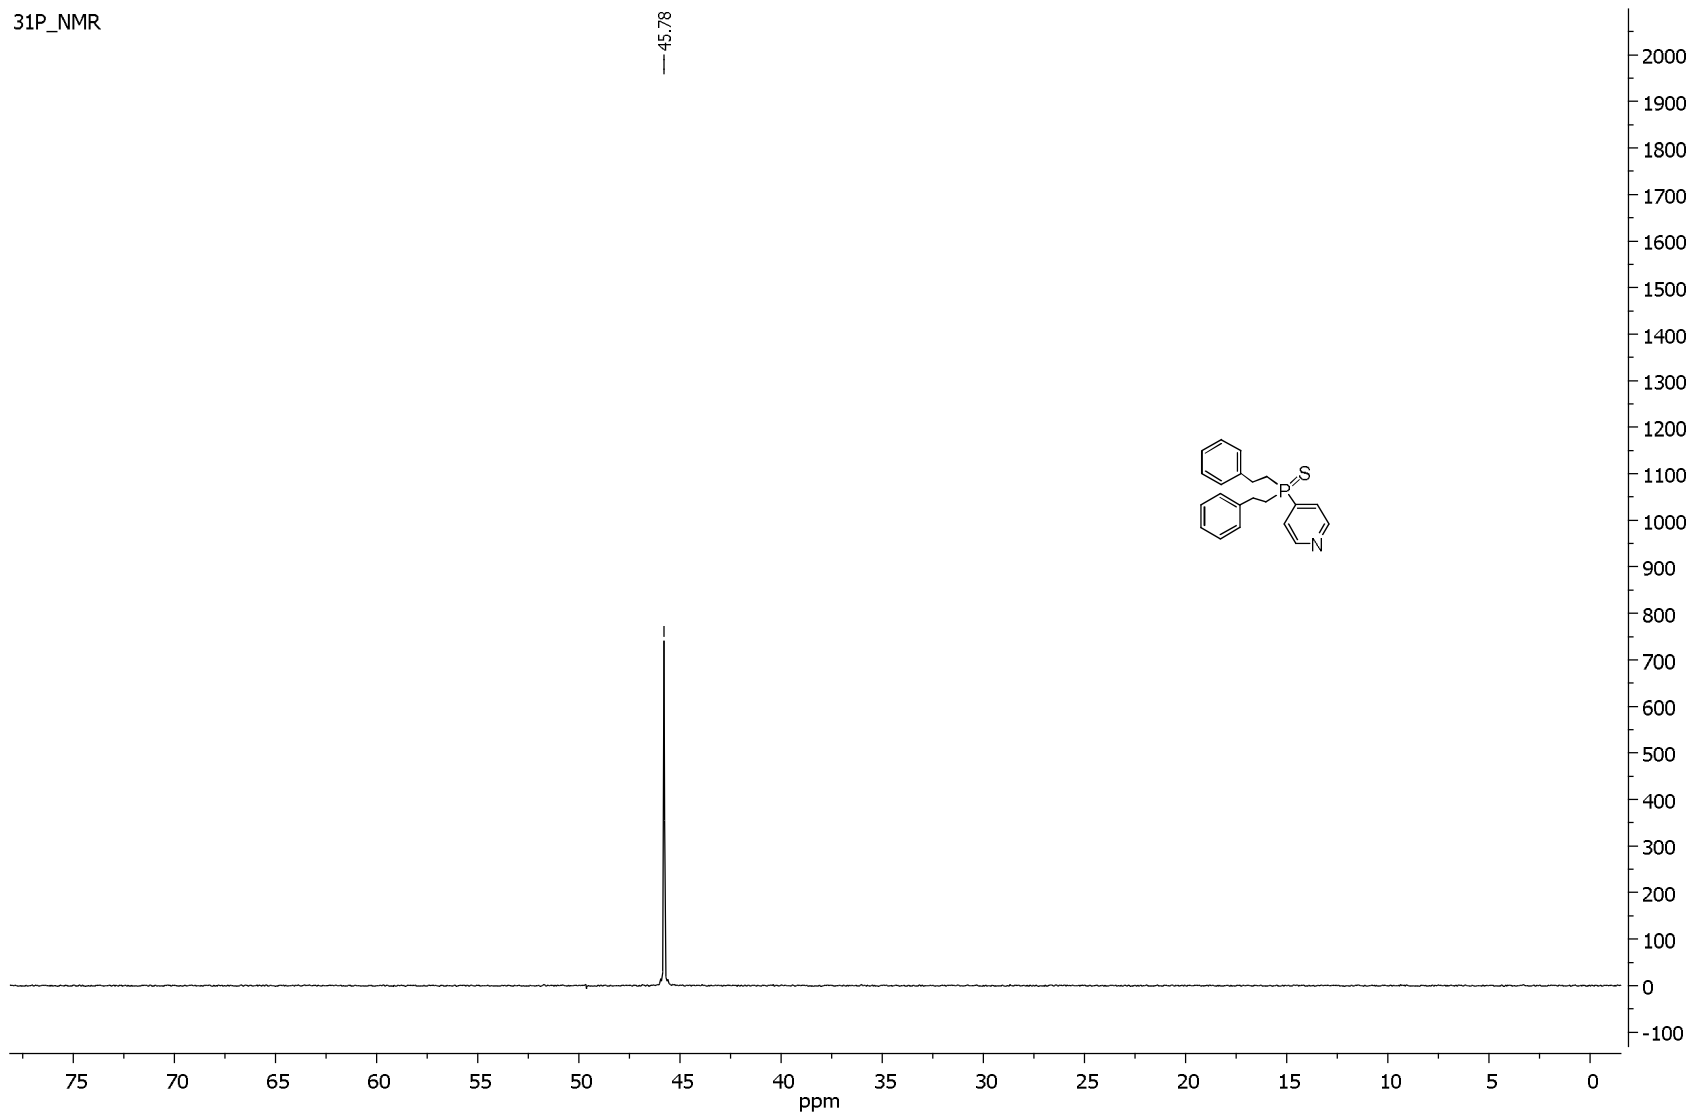

4-[Bis(2-phenylethyl)phosphorothioyl]pyridine (4f)

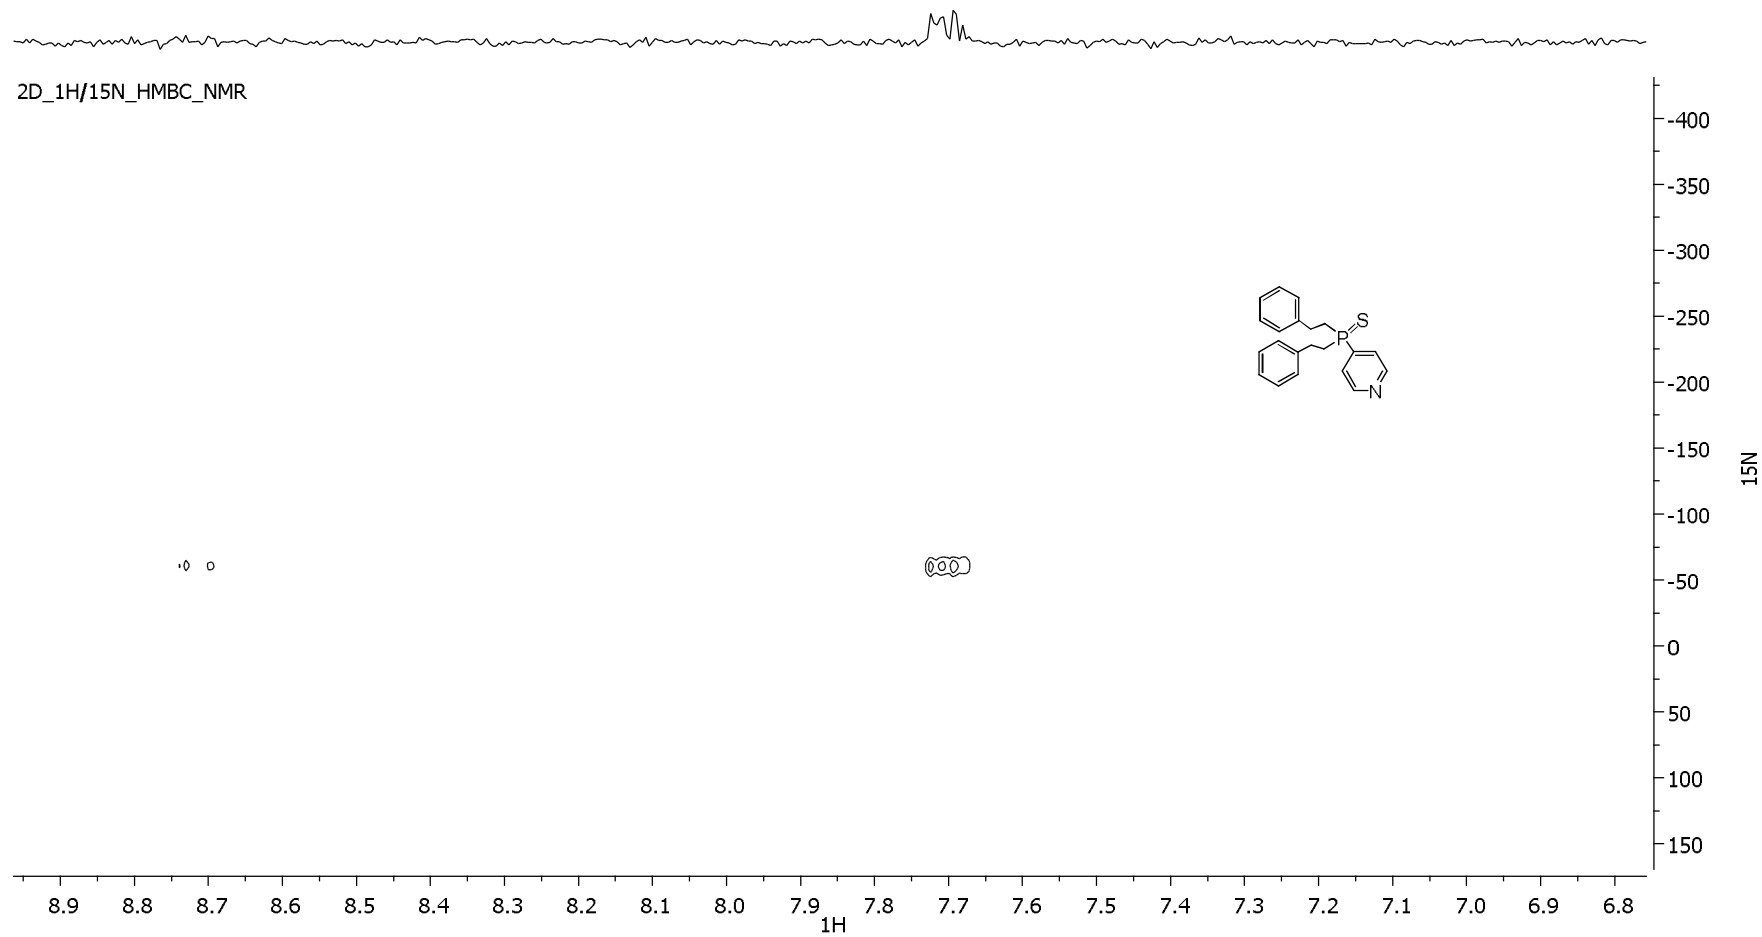

# 4-{Bis[2-(4-chlorophenyl)ethyl]phosphorothioyl}pyridine (4g)

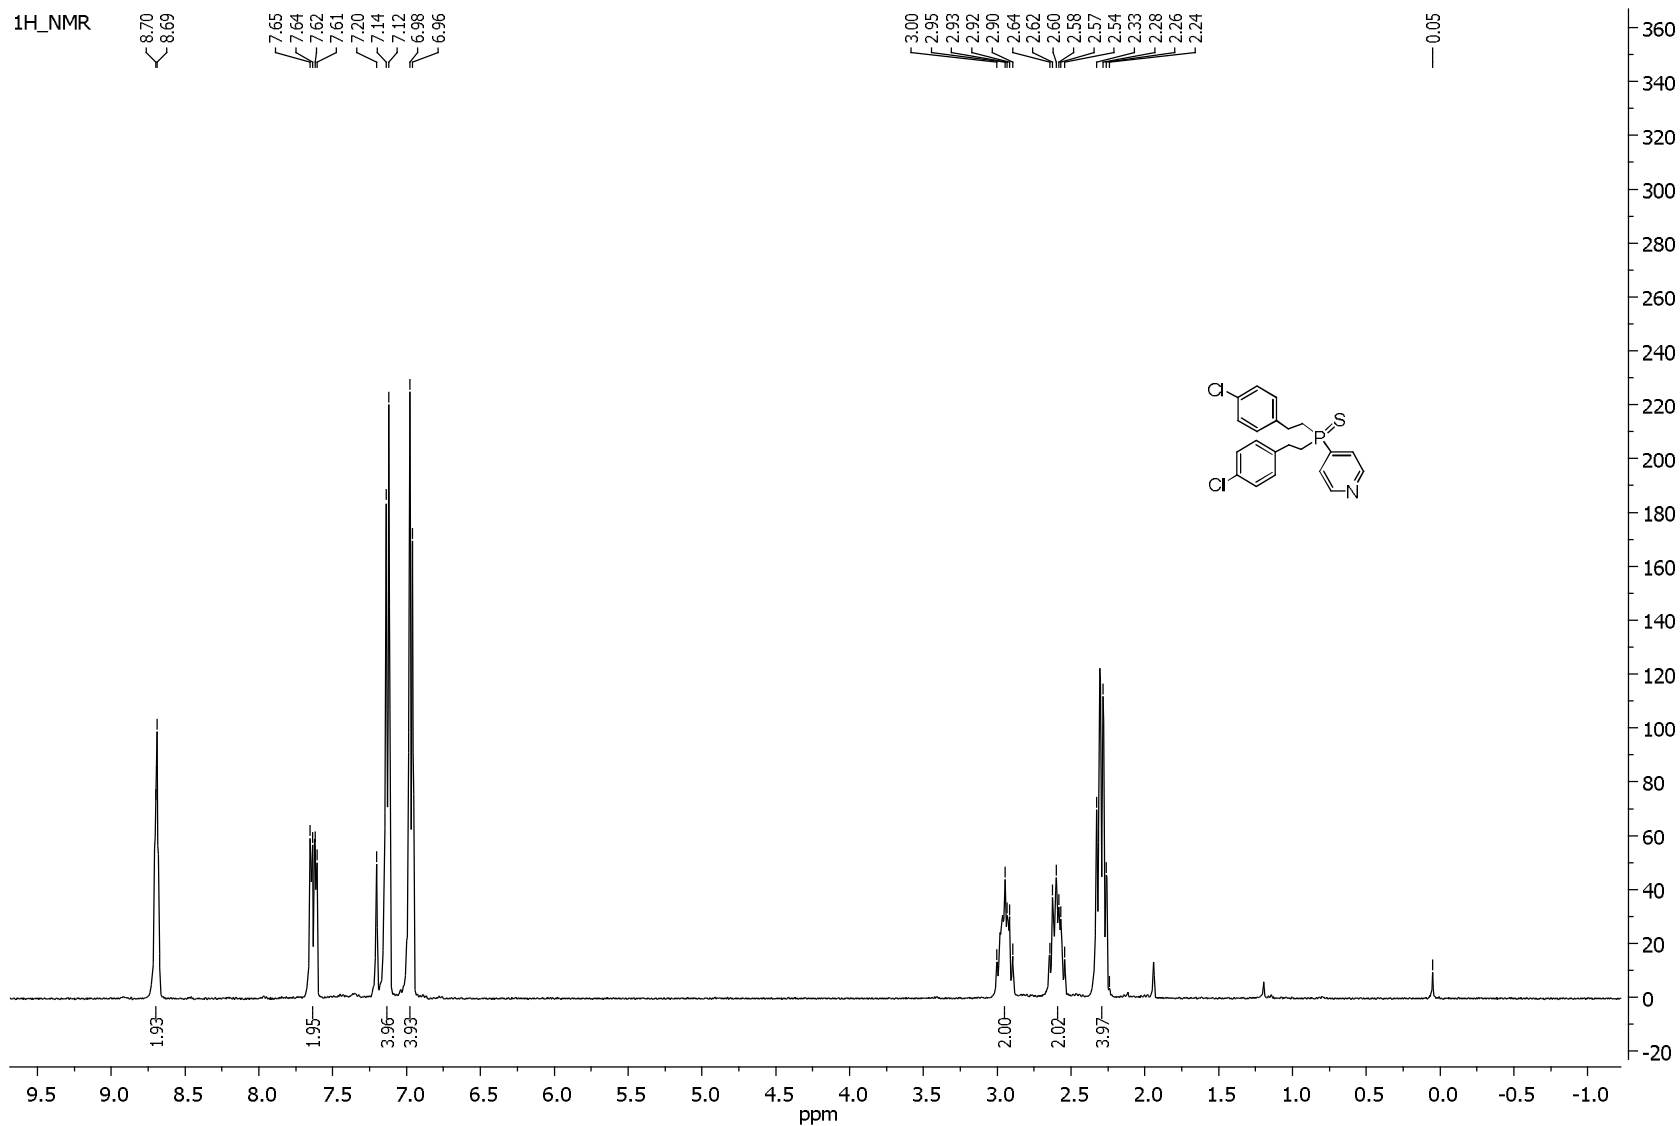

# 4-{Bis[2-(4-chlorophenyl)ethyl]phosphorothioyl}pyridine (4g)

13C\_NMR

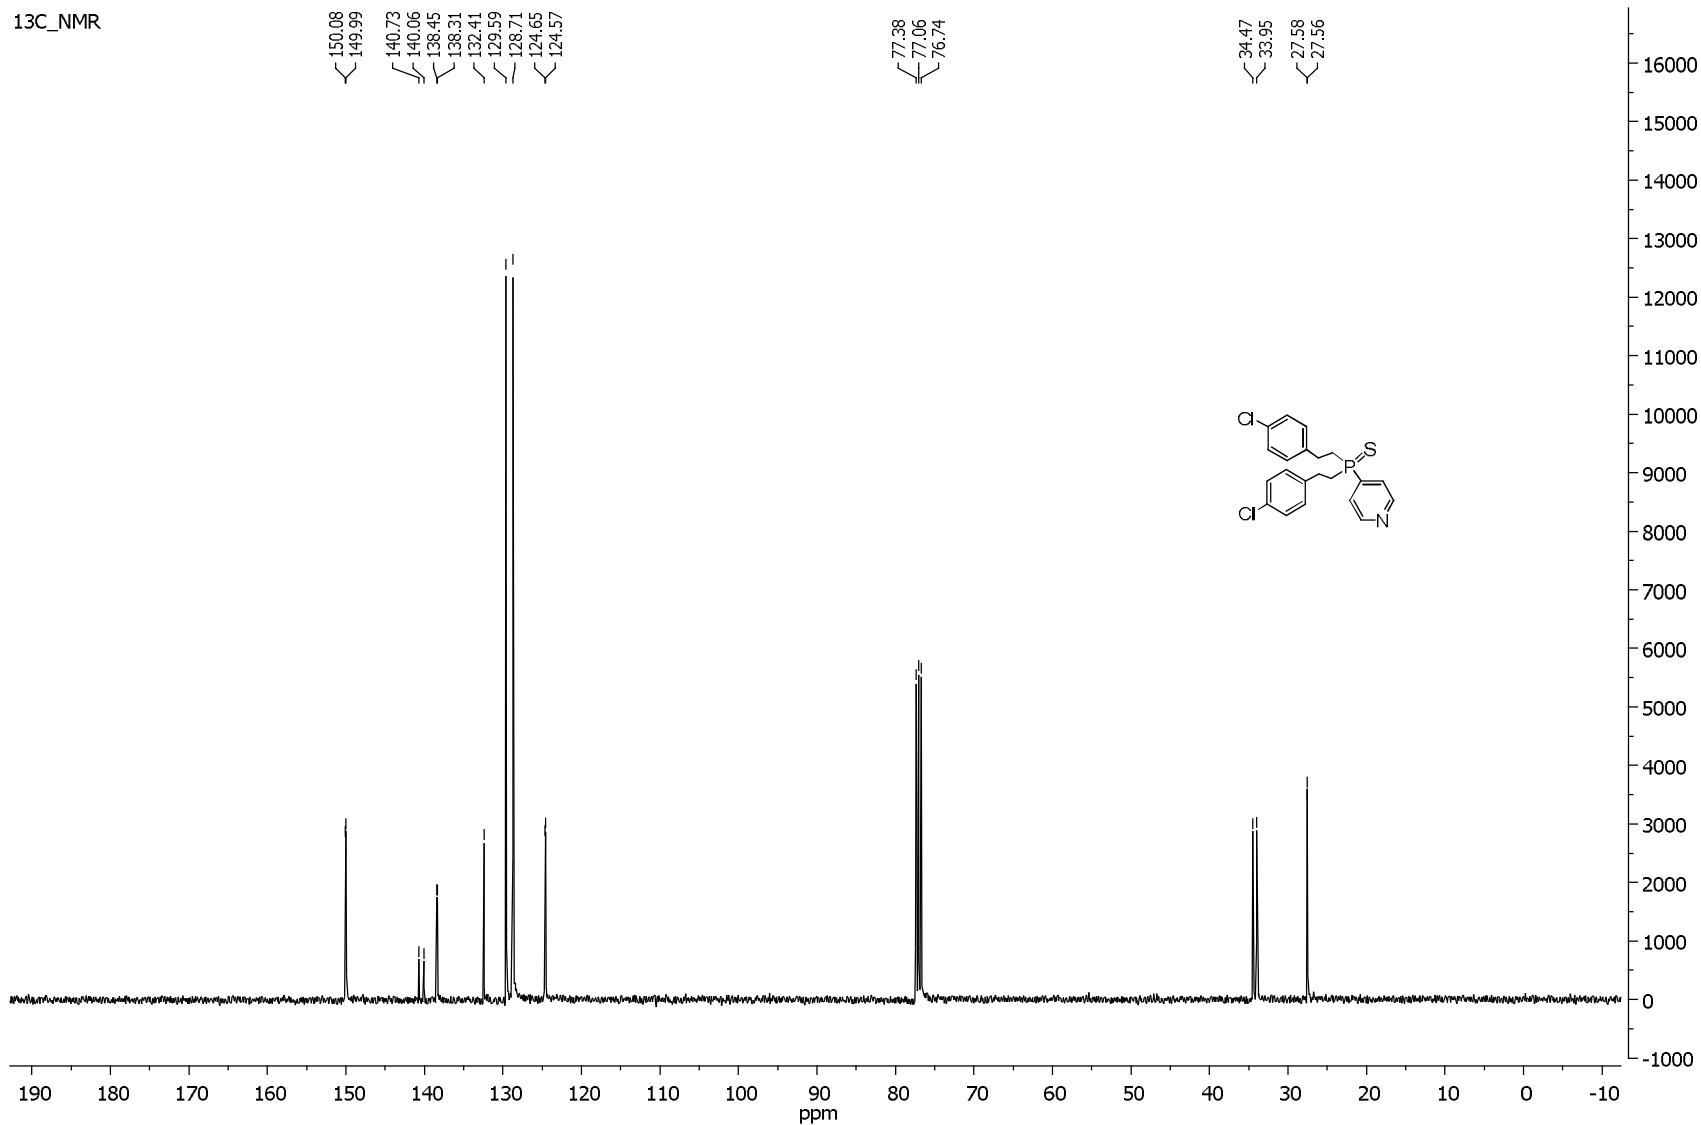

4-{Bis[2-(4-chlorophenyl)ethyl]phosphorothioyl}pyridine (4g)

31P\_NMR

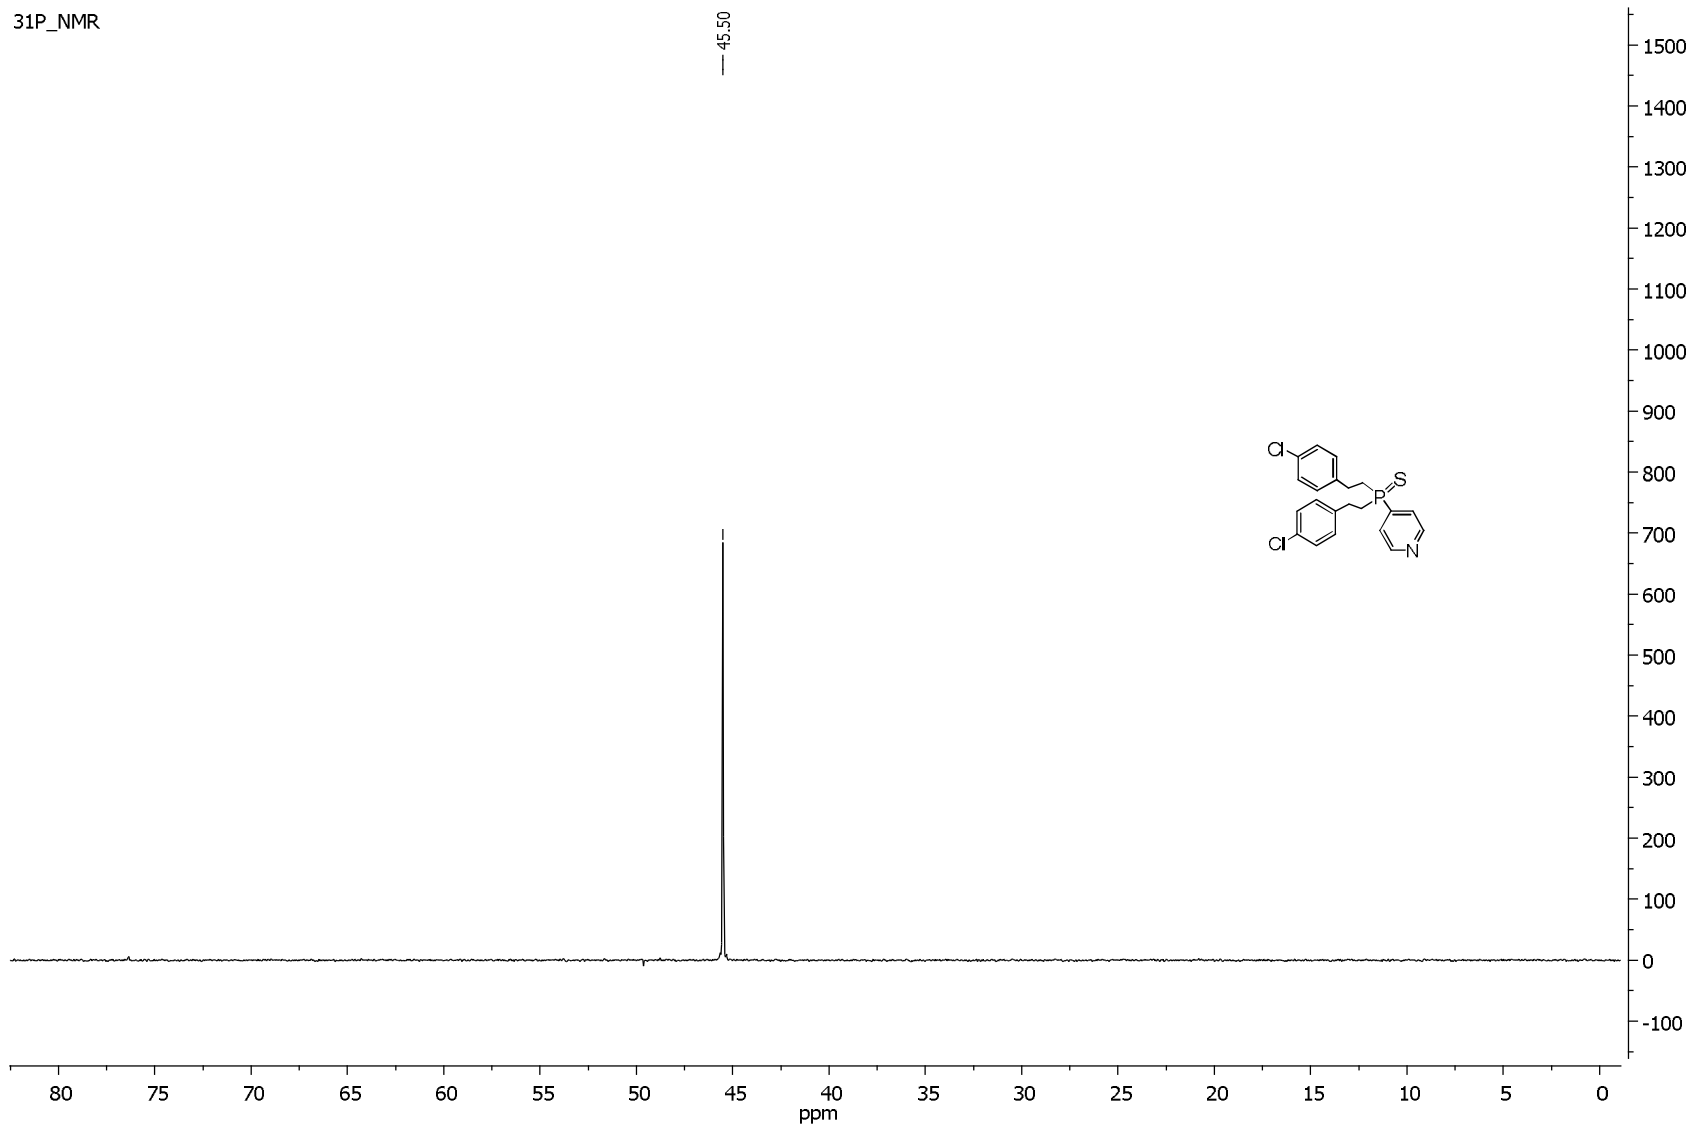

4-{Bis[2-(4-chlorophenyl)ethyl]phosphorothioyl}pyridine (4g)

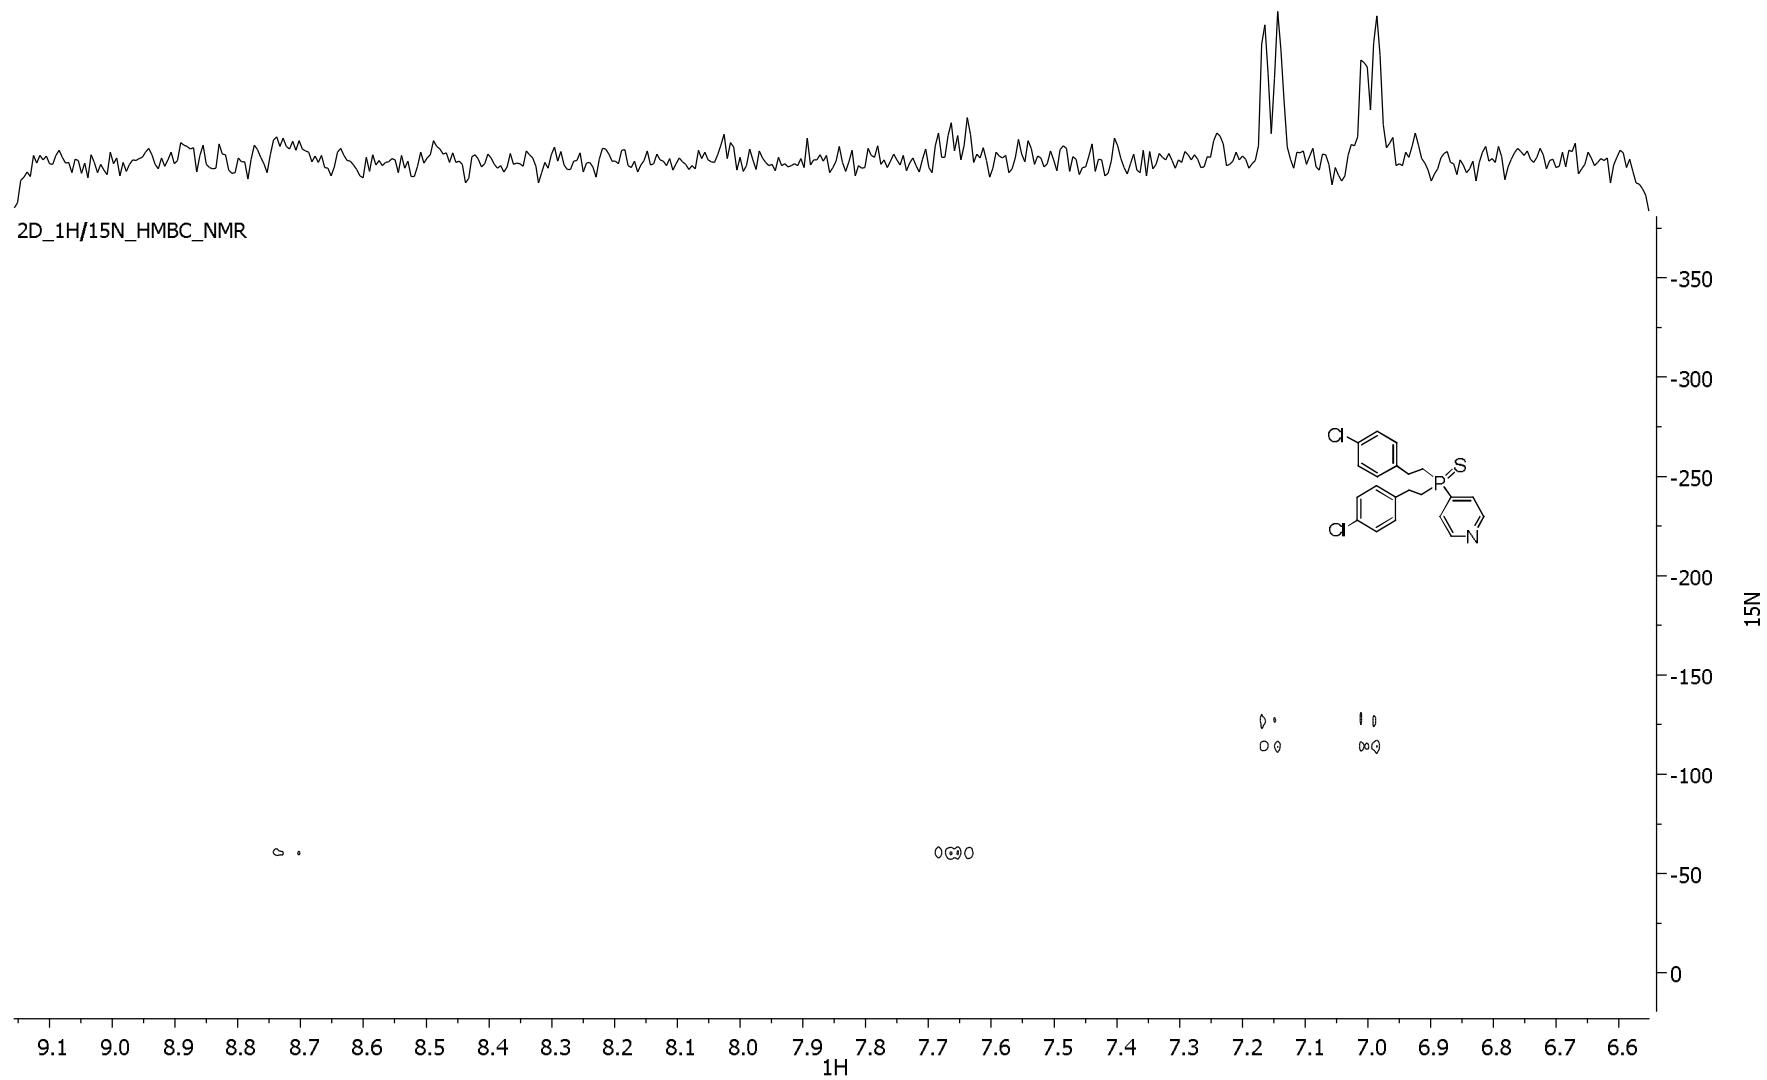

# 4-[Bis(2-phenylpropyl)phosphorothioyl]pyridine (4h)

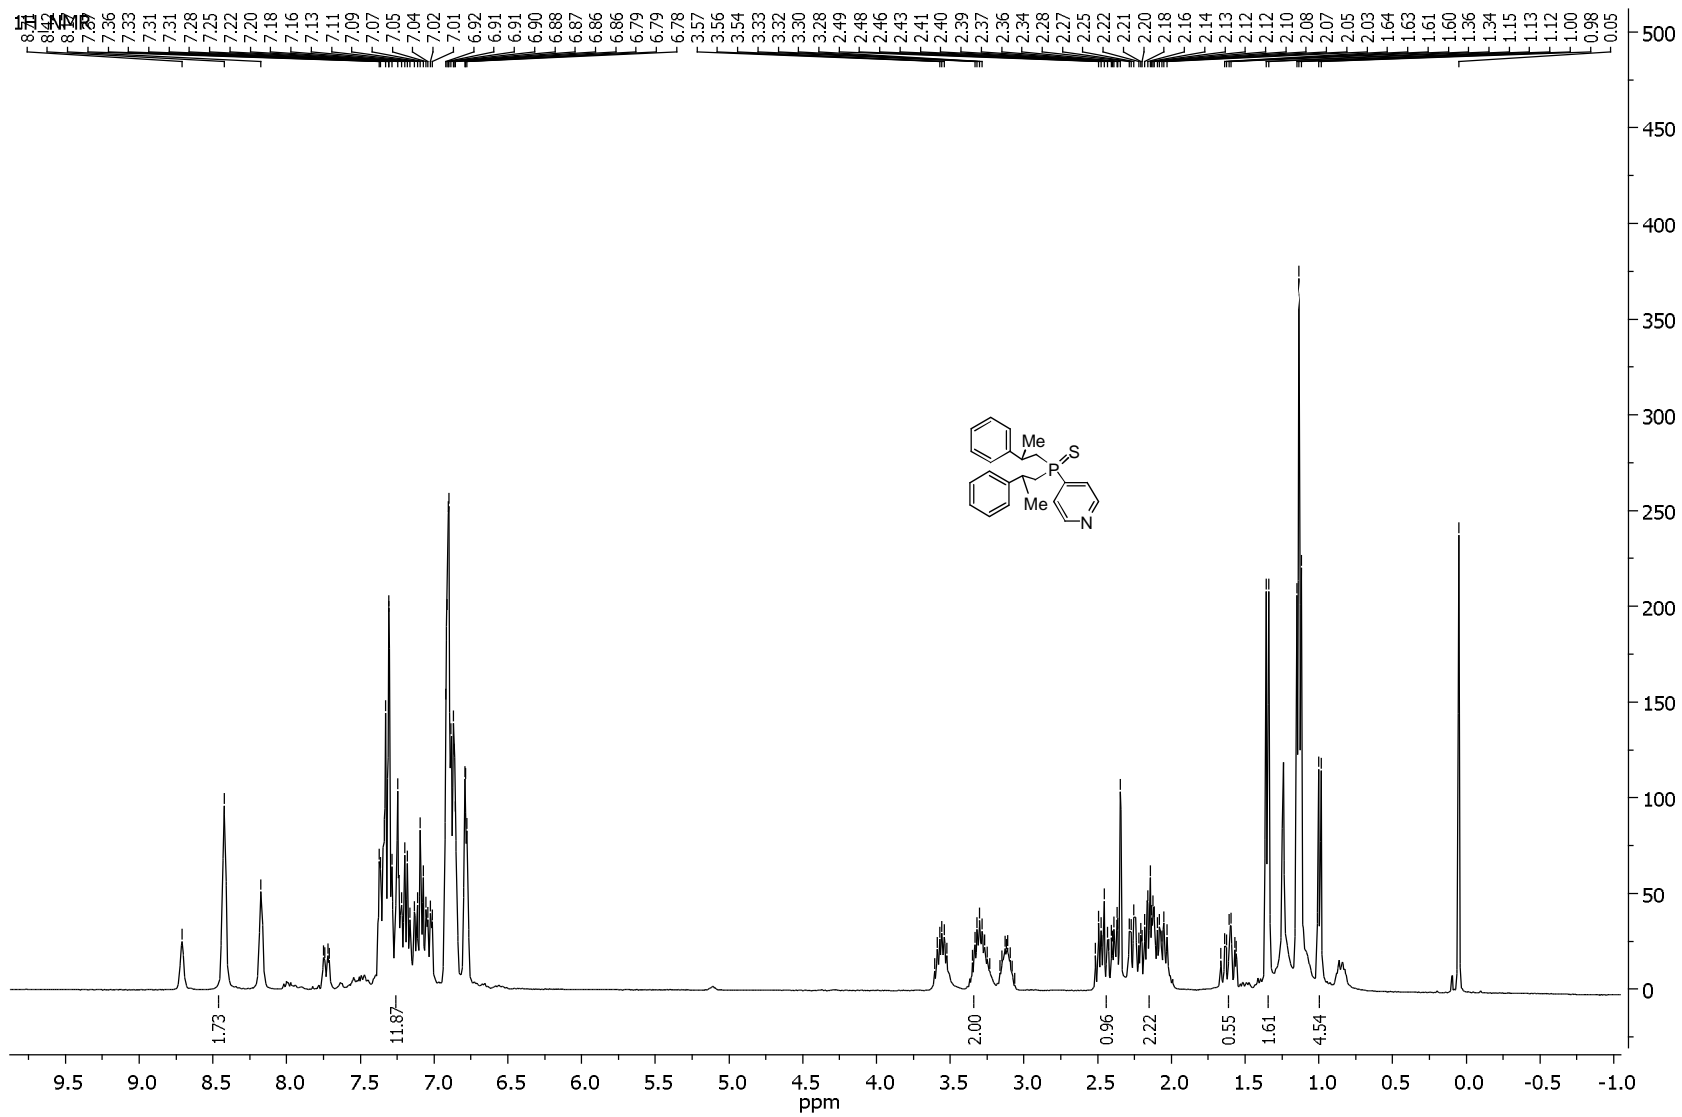

# 4-[Bis(2-phenylpropyl)phosphorothioyl]pyridine (4h)

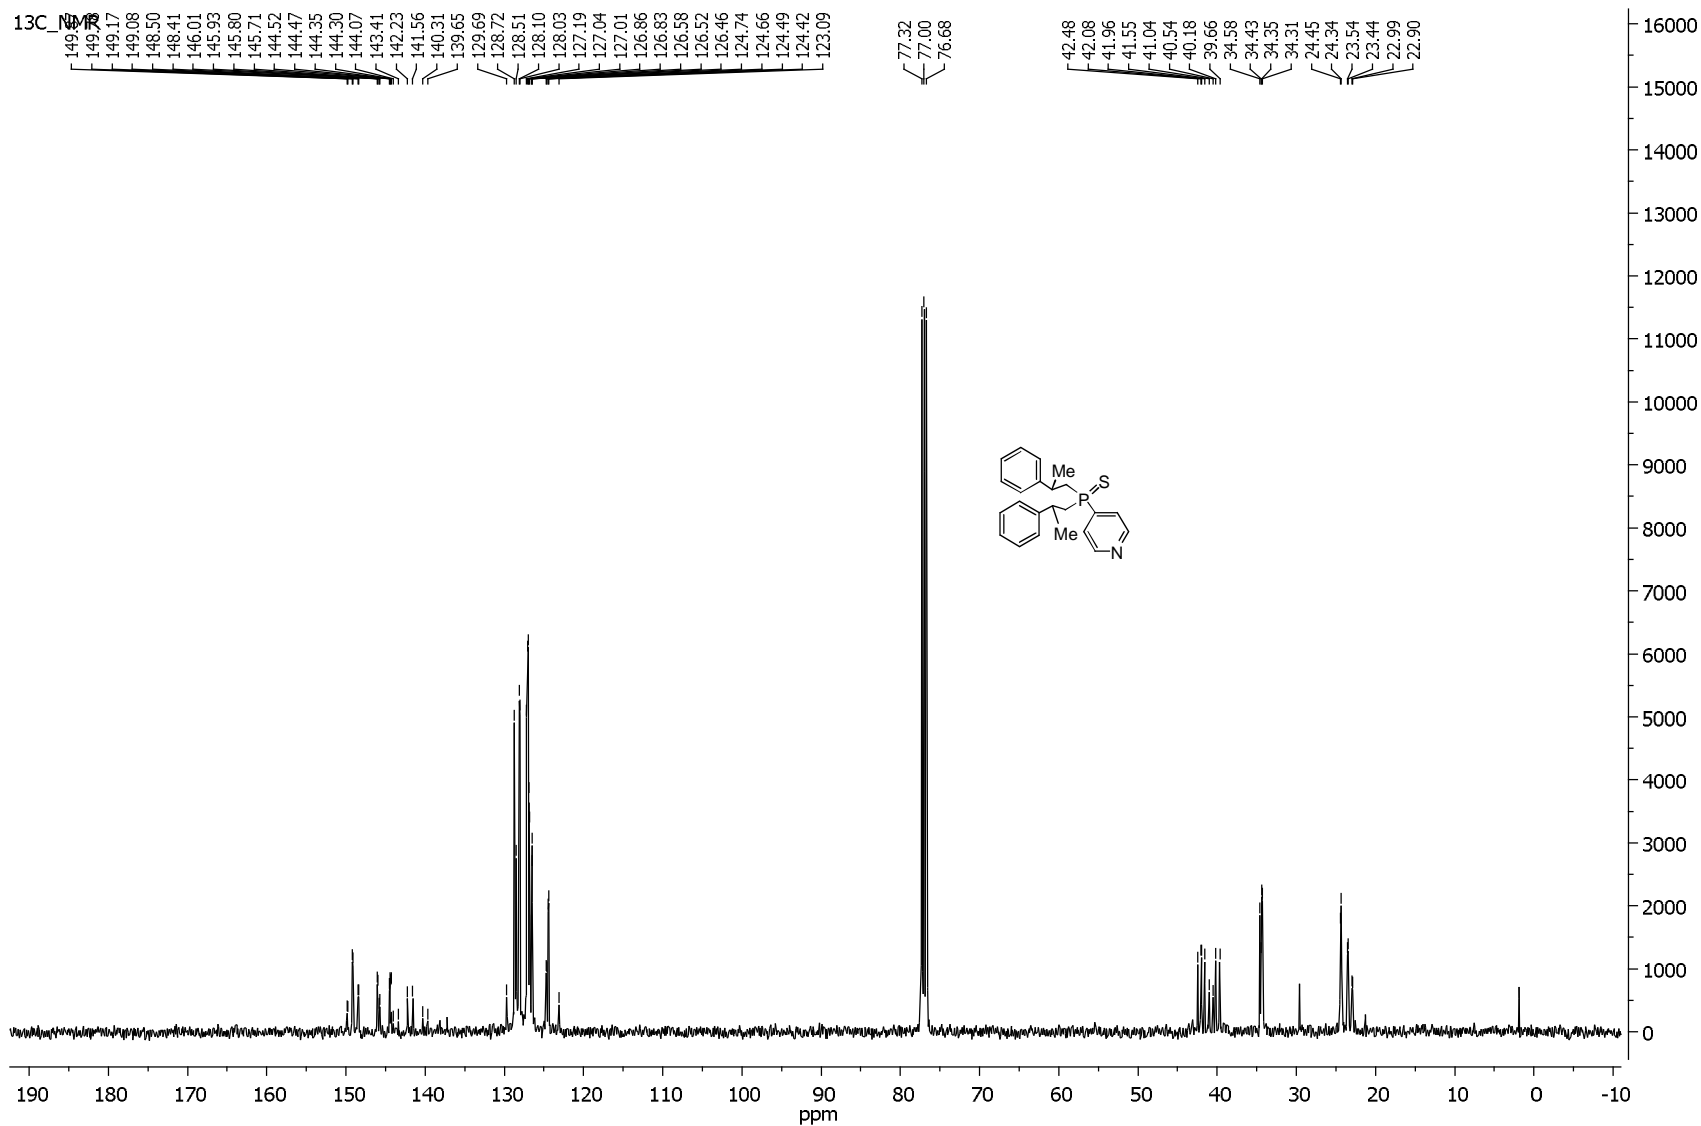



# 4-[Bis(2-phenylpropyl)phosphorothioyl]pyridine (4h)

31P\_NMR

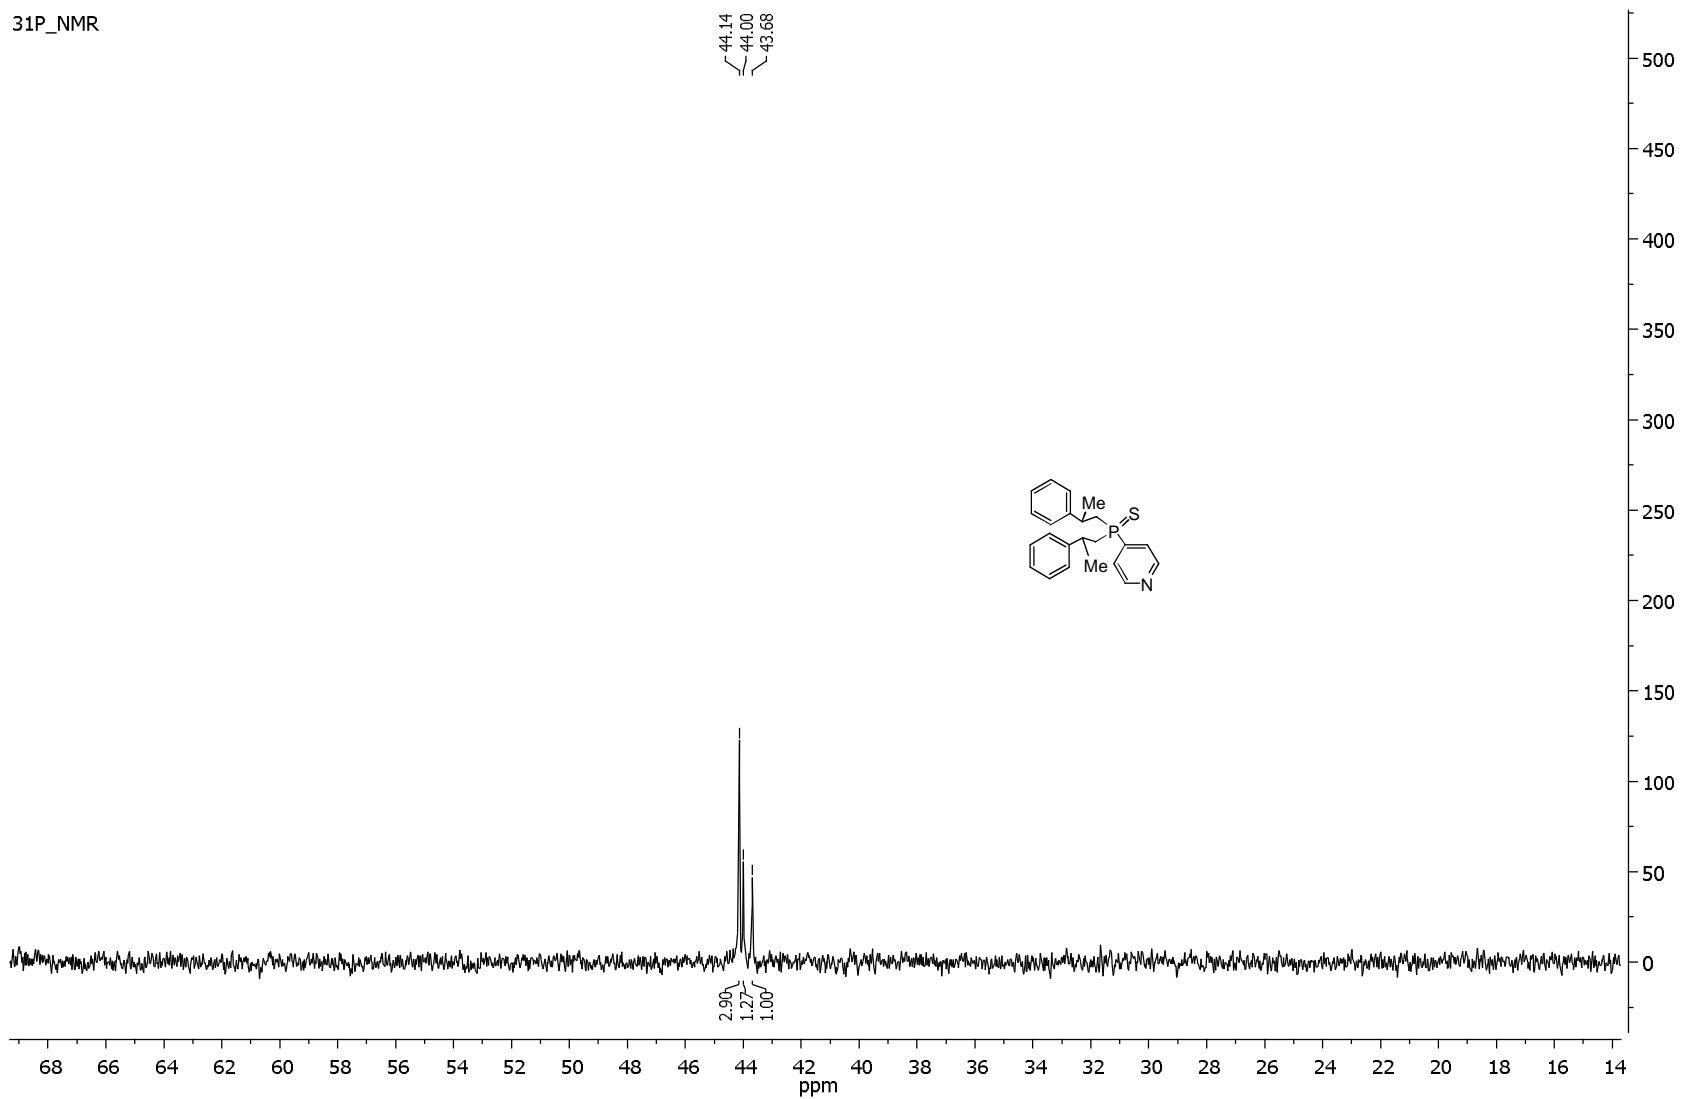

4-[Bis(2-phenylpropyl)phosphorothioyl]pyridine (4h)

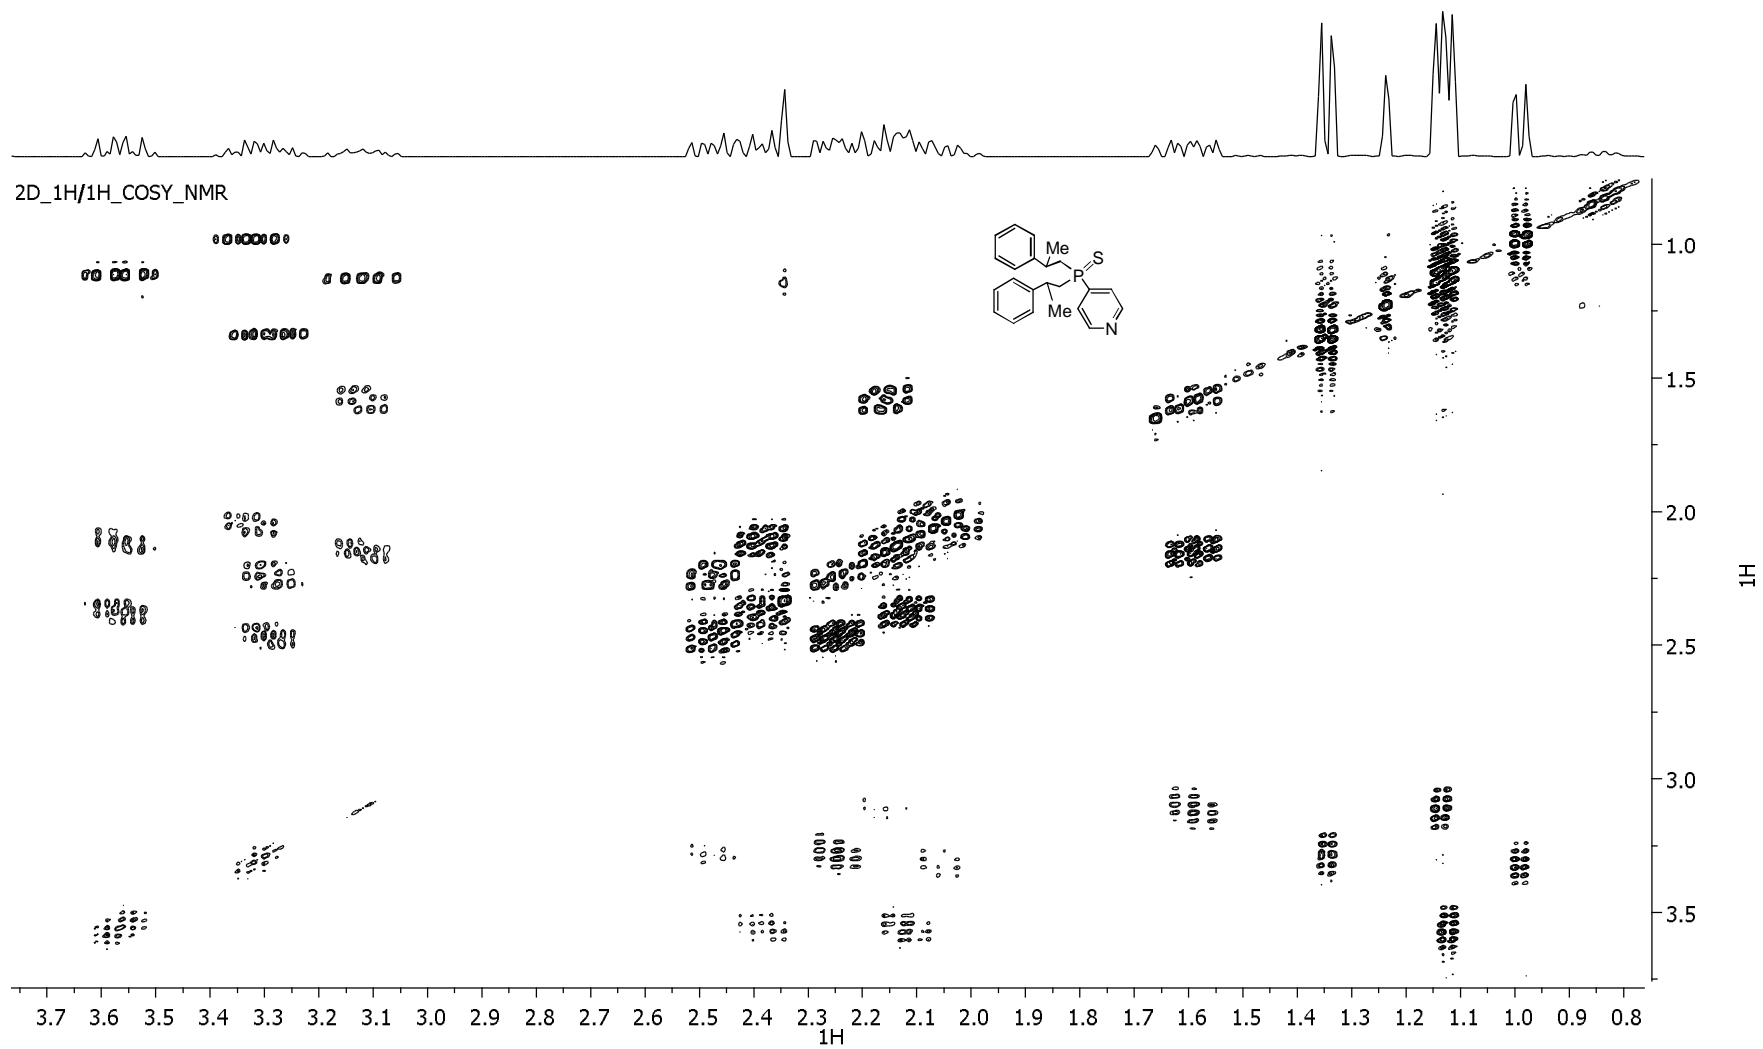

4-[Bis(2-phenylpropyl)phosphorothioyl]pyridine (4h)

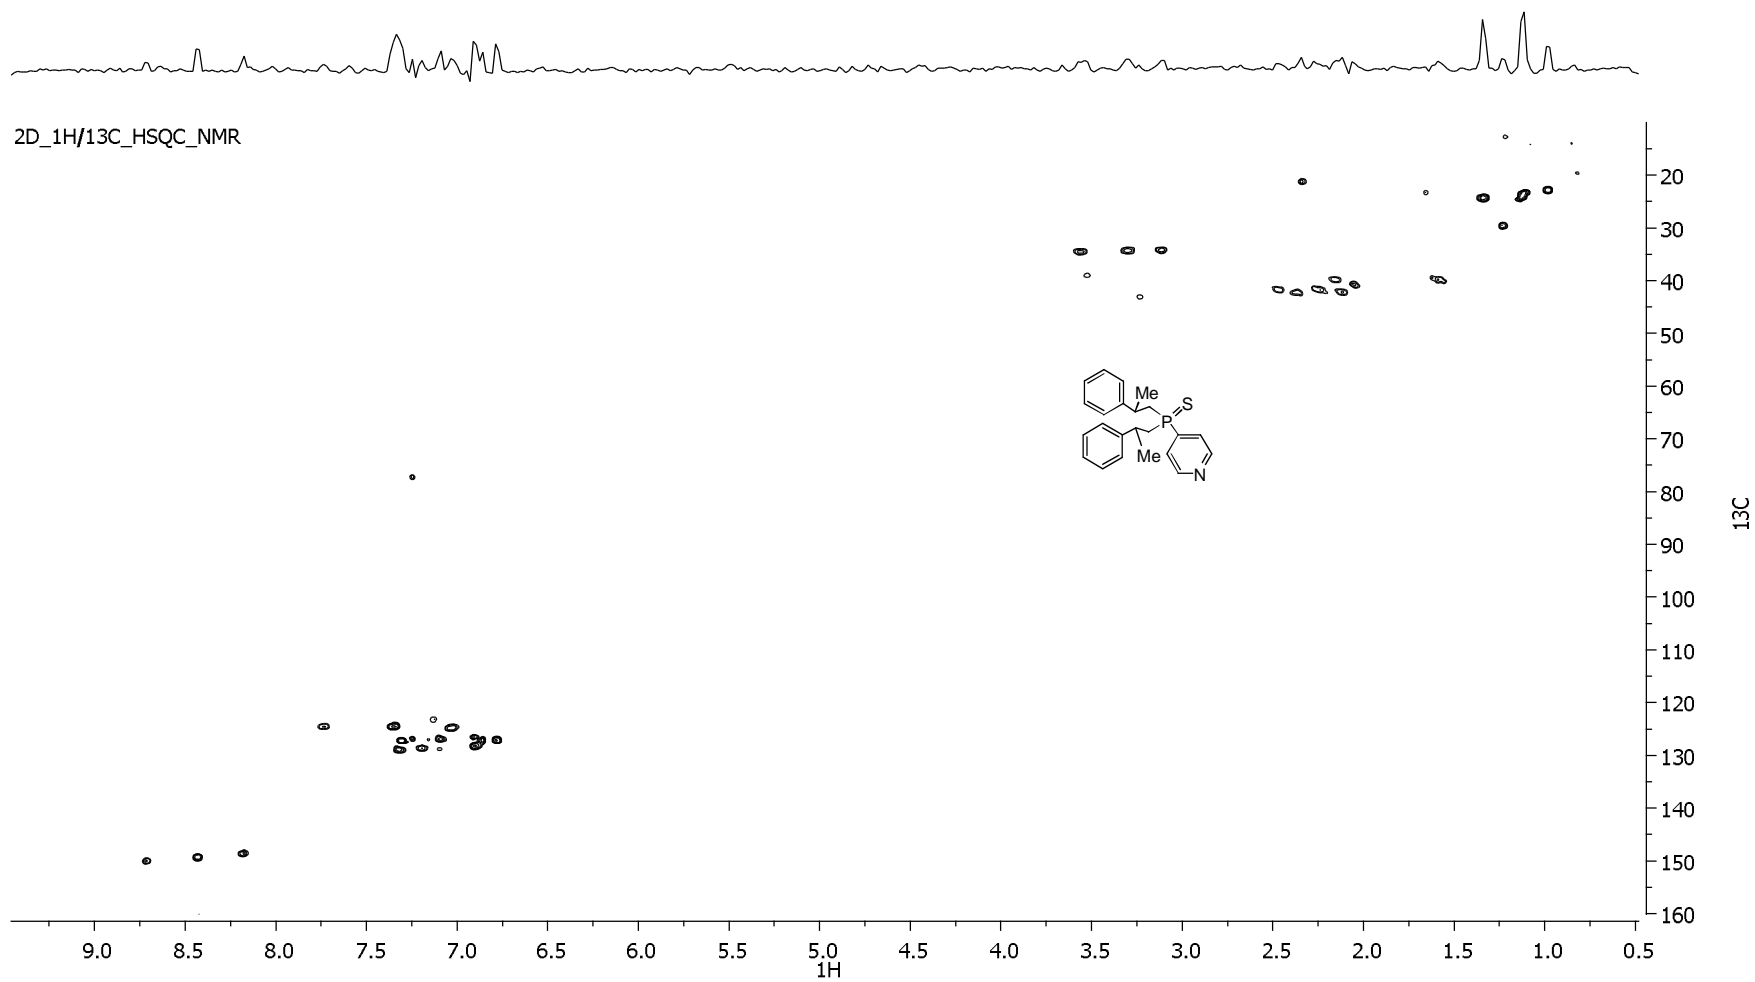

4-[Bis(2-phenylpropyl)phosphorothioyl]pyridine (4h)

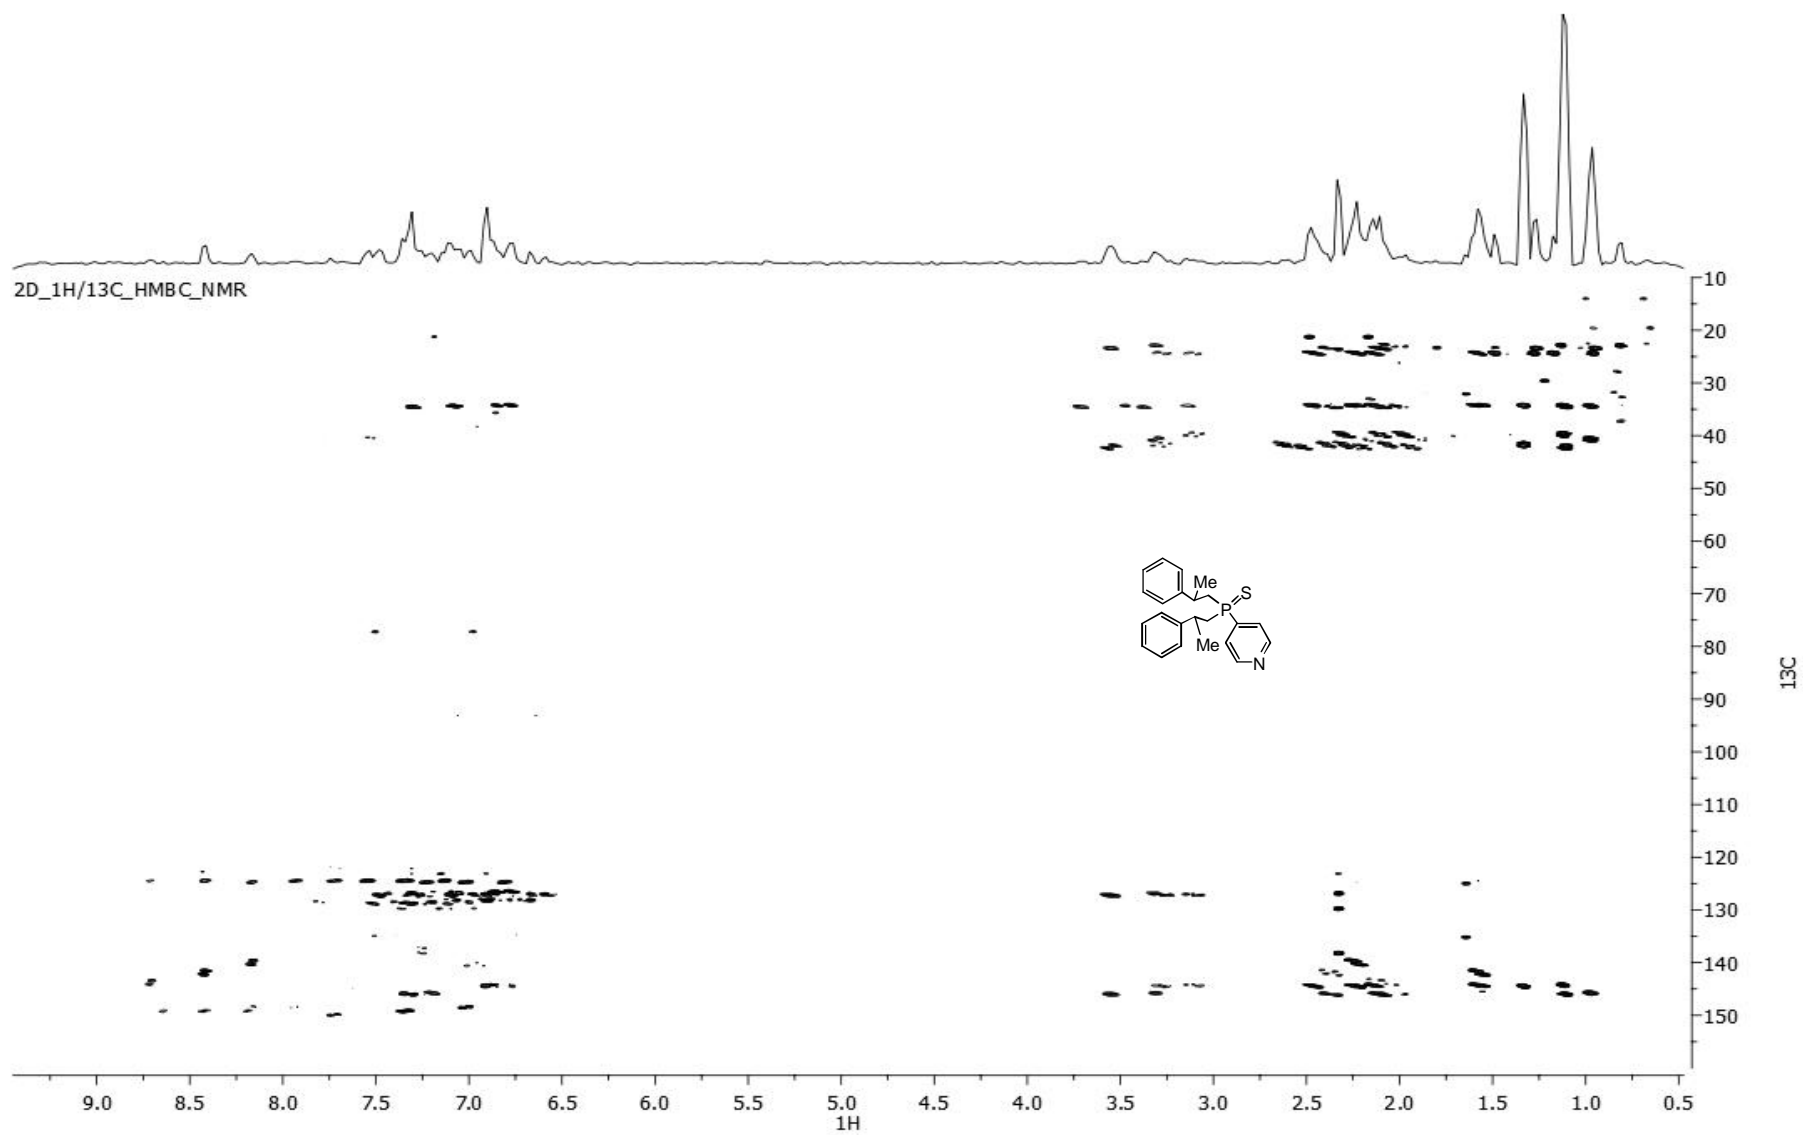

# 4-[Bis(2-phenylethyl)phosphoroselenoyl]pyridine (4i)

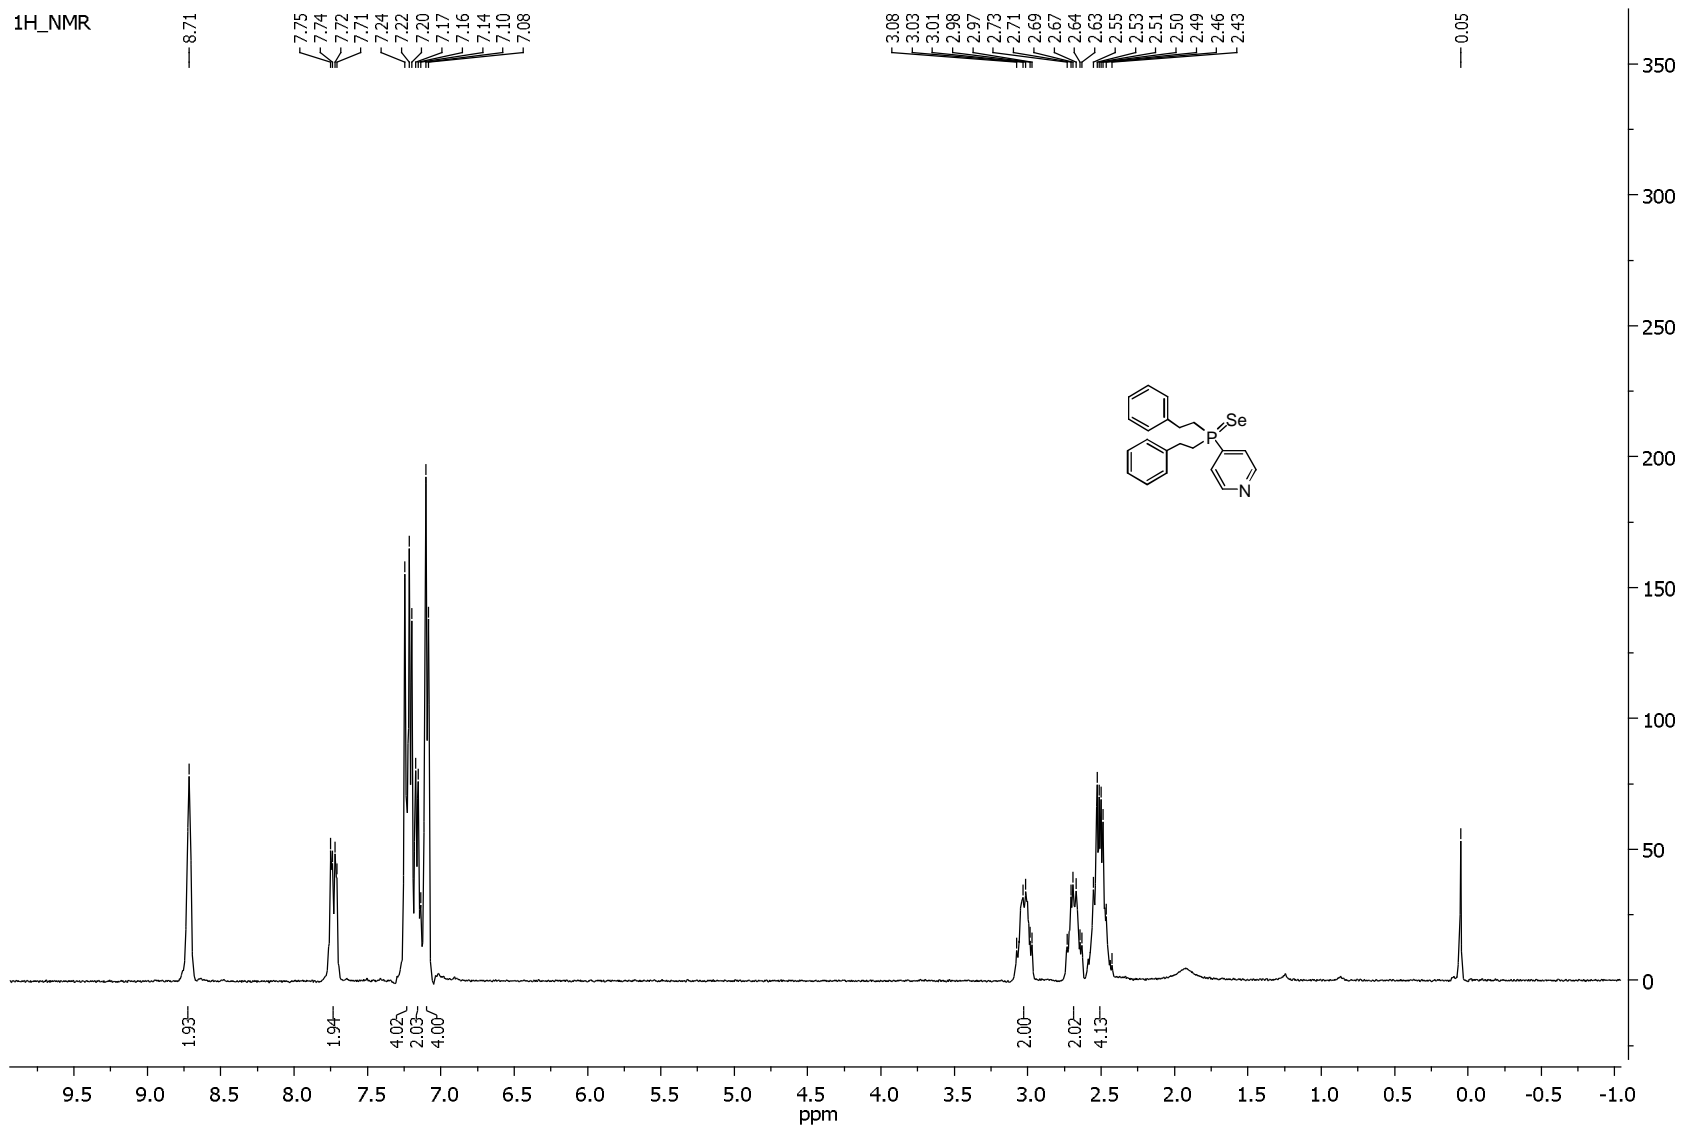

# 4-[Bis(2-phenylethyl)phosphoroselenoyl]pyridine (4i)

<sup>13</sup>C\_NMR

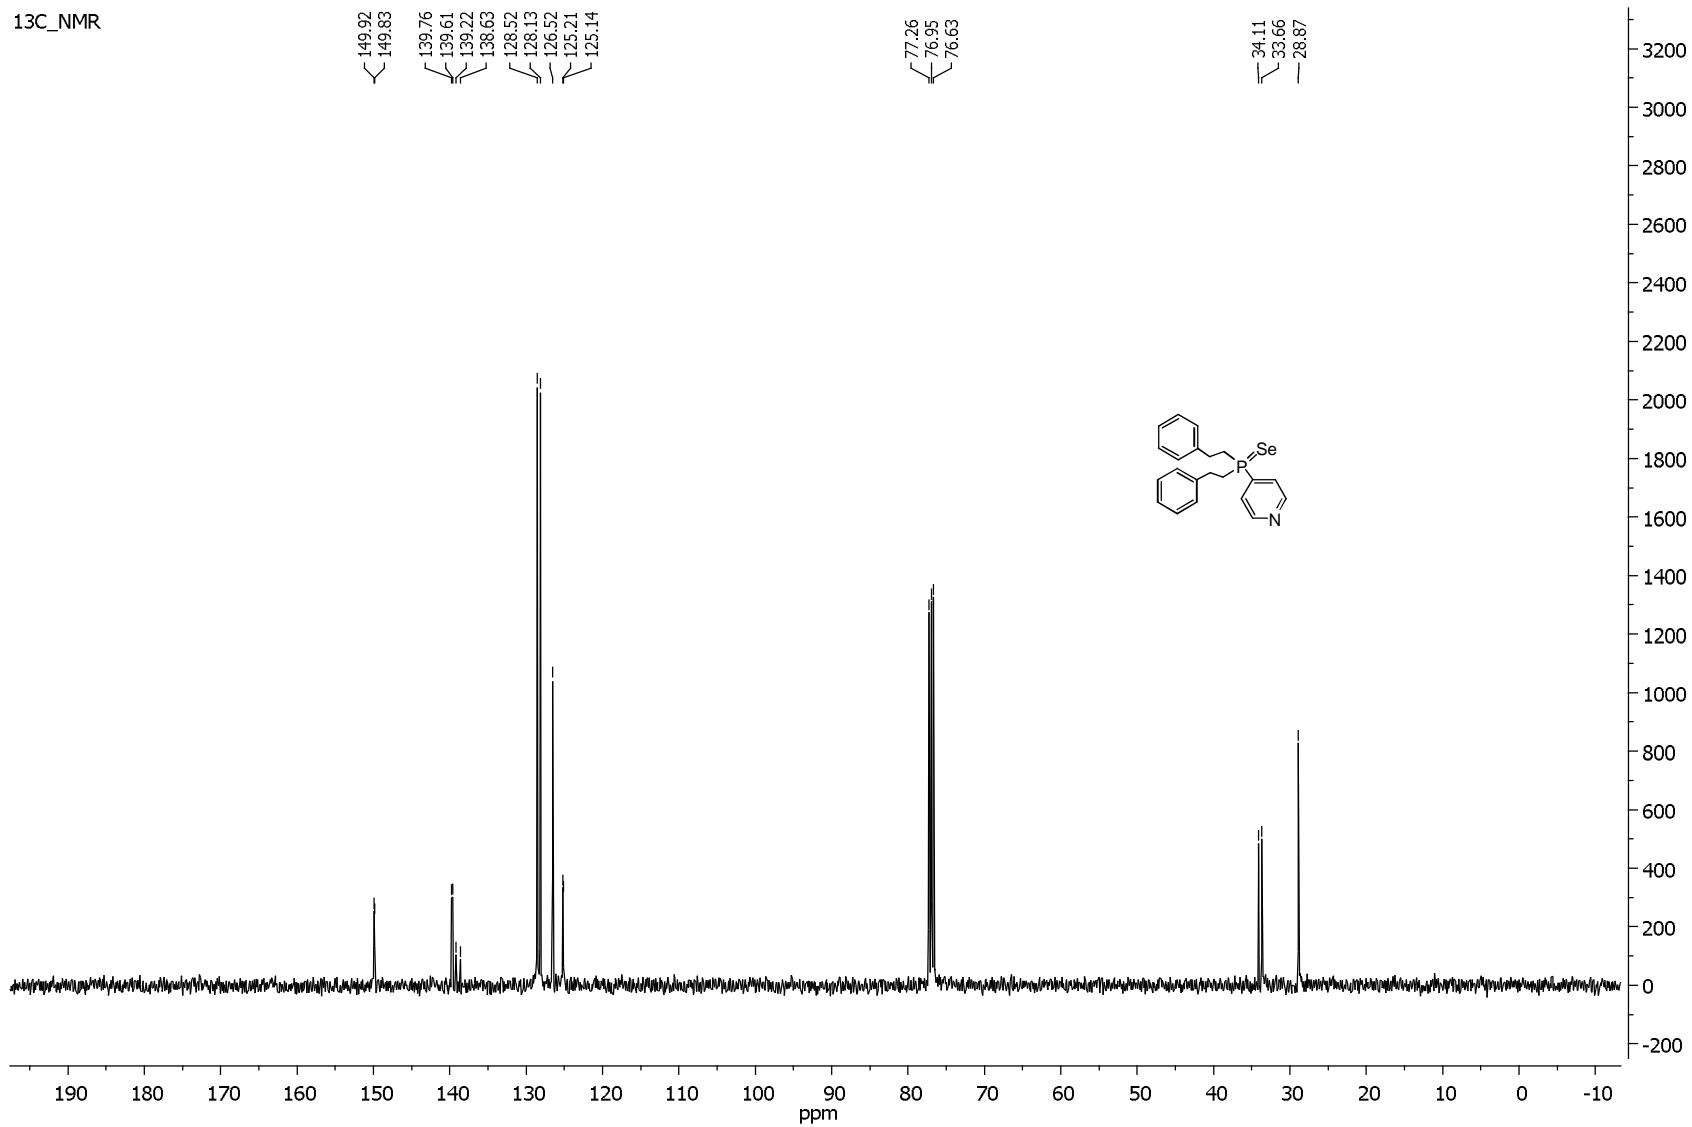

4-[Bis(2-phenylethyl)phosphoroselenoyl]pyridine (4i)

31P\_NMR

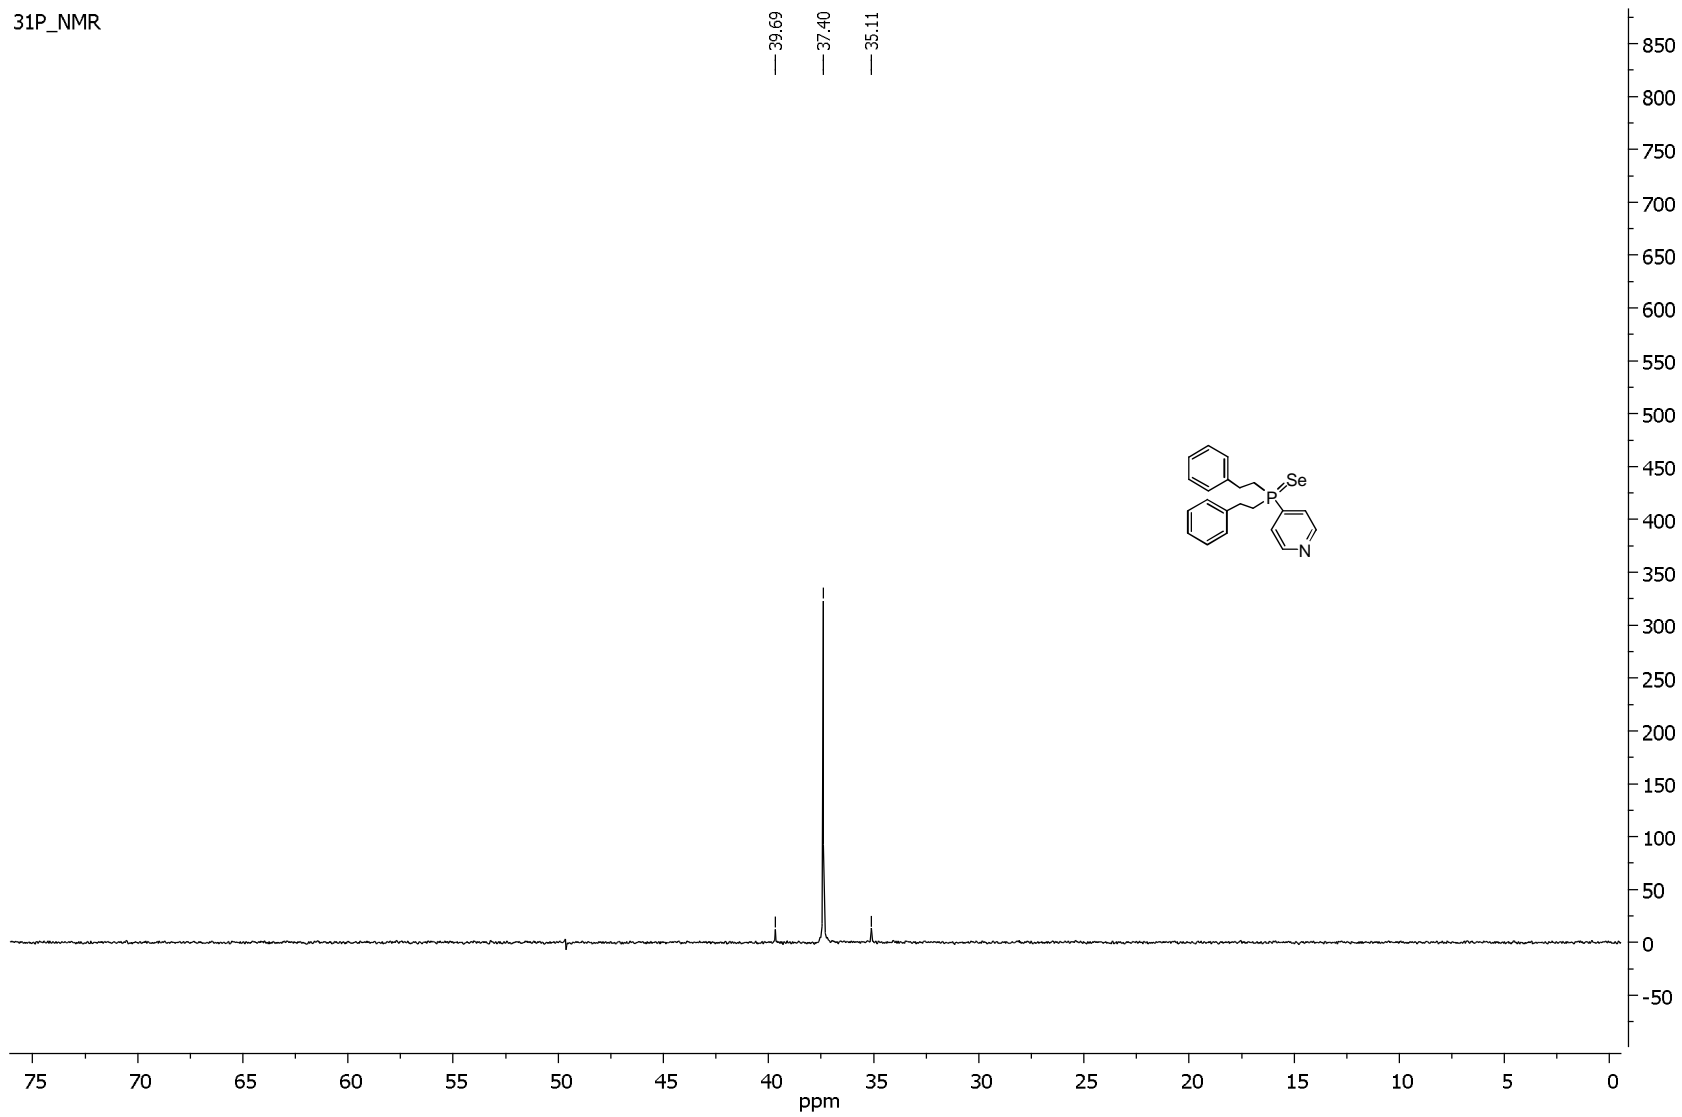

# 4-[Bis(2-phenylethyl)phosphoroselenoyl]pyridine (4i)

<sup>77</sup>Se\_NMR

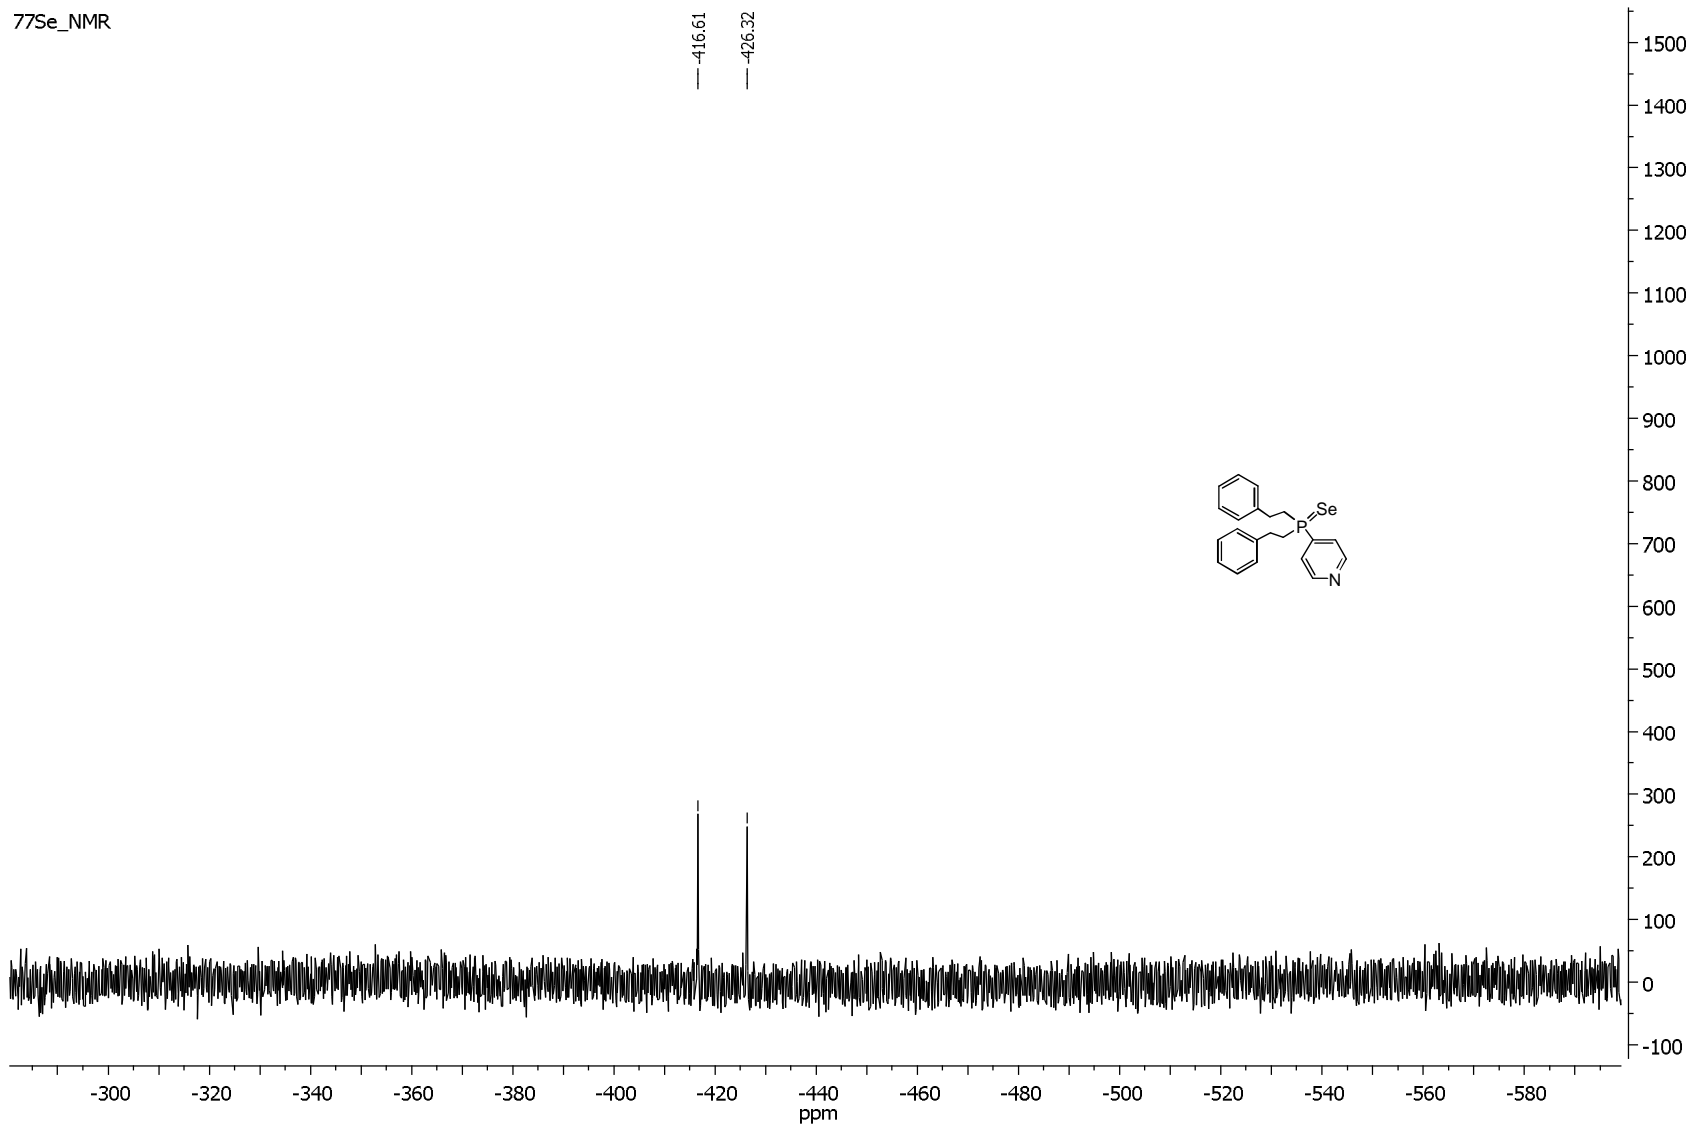



4-[Bis(2-phenylethyl)phosphoroselenoyl]pyridine (4i)

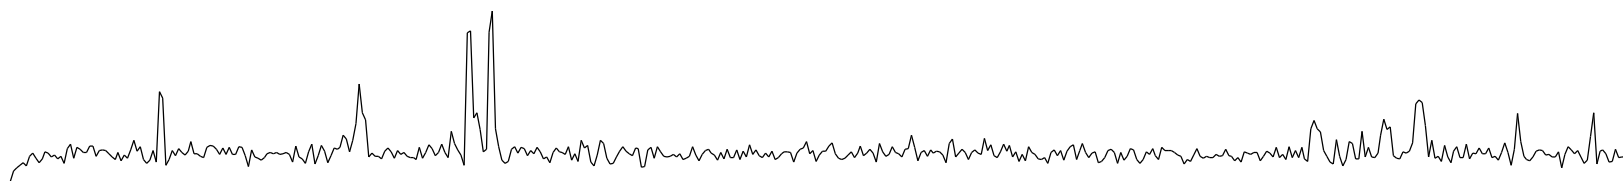

2D\_1H/13C\_HSQC\_NMR

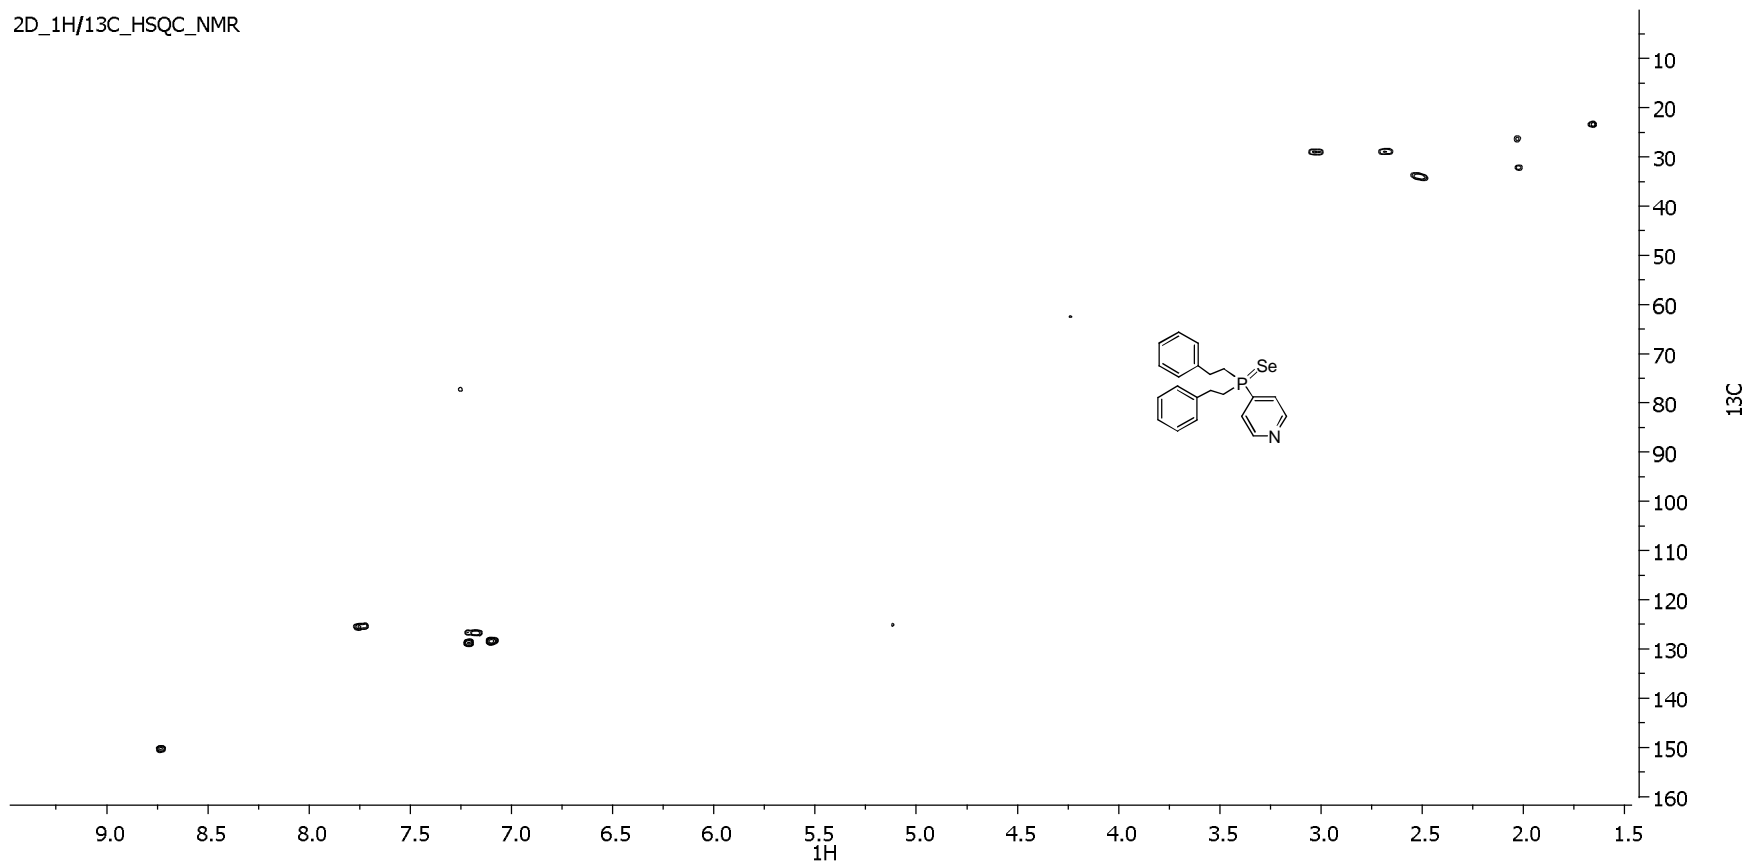

4-[Bis(2-phenylethyl)phosphoroselenoyl]pyridine (4i)

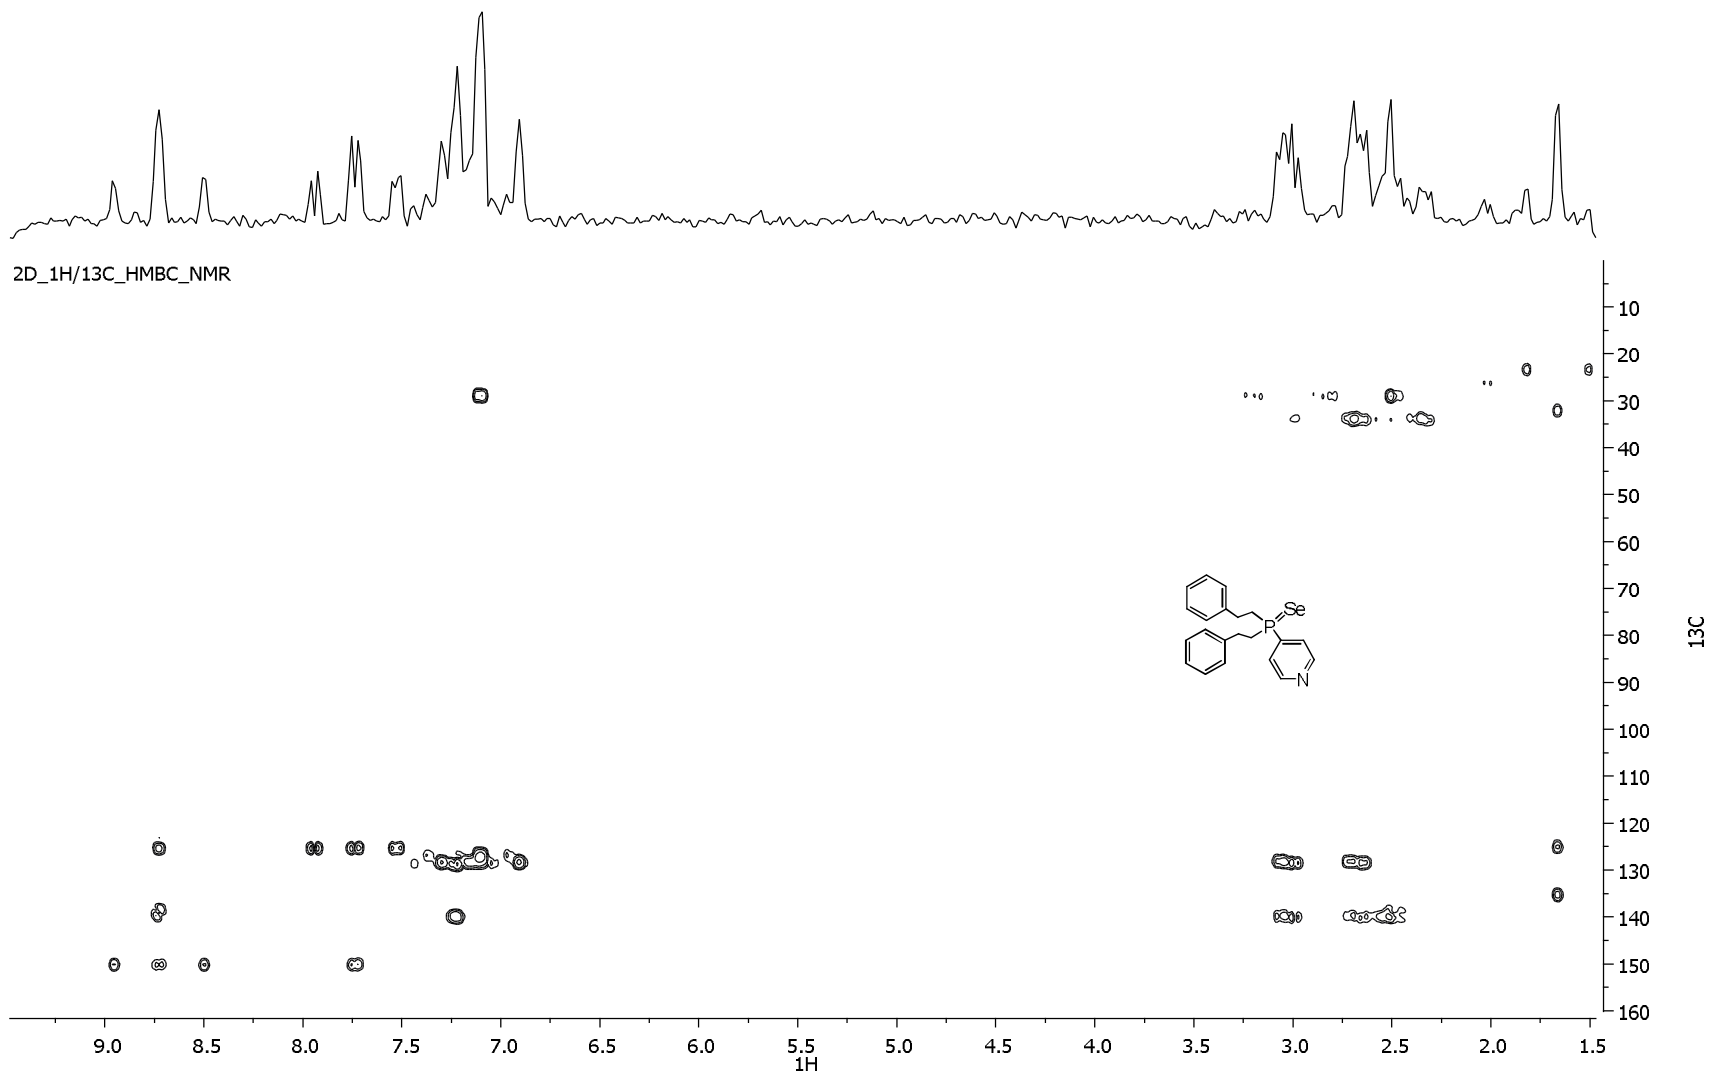

4-[Bis(2-phenylethyl)phosphoroselenoyl]pyridine (4i)

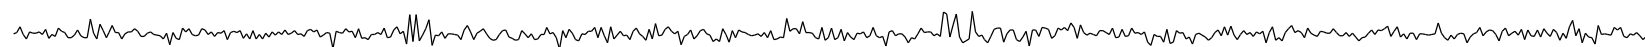

2D\_1H/15N\_HMBC\_NMR

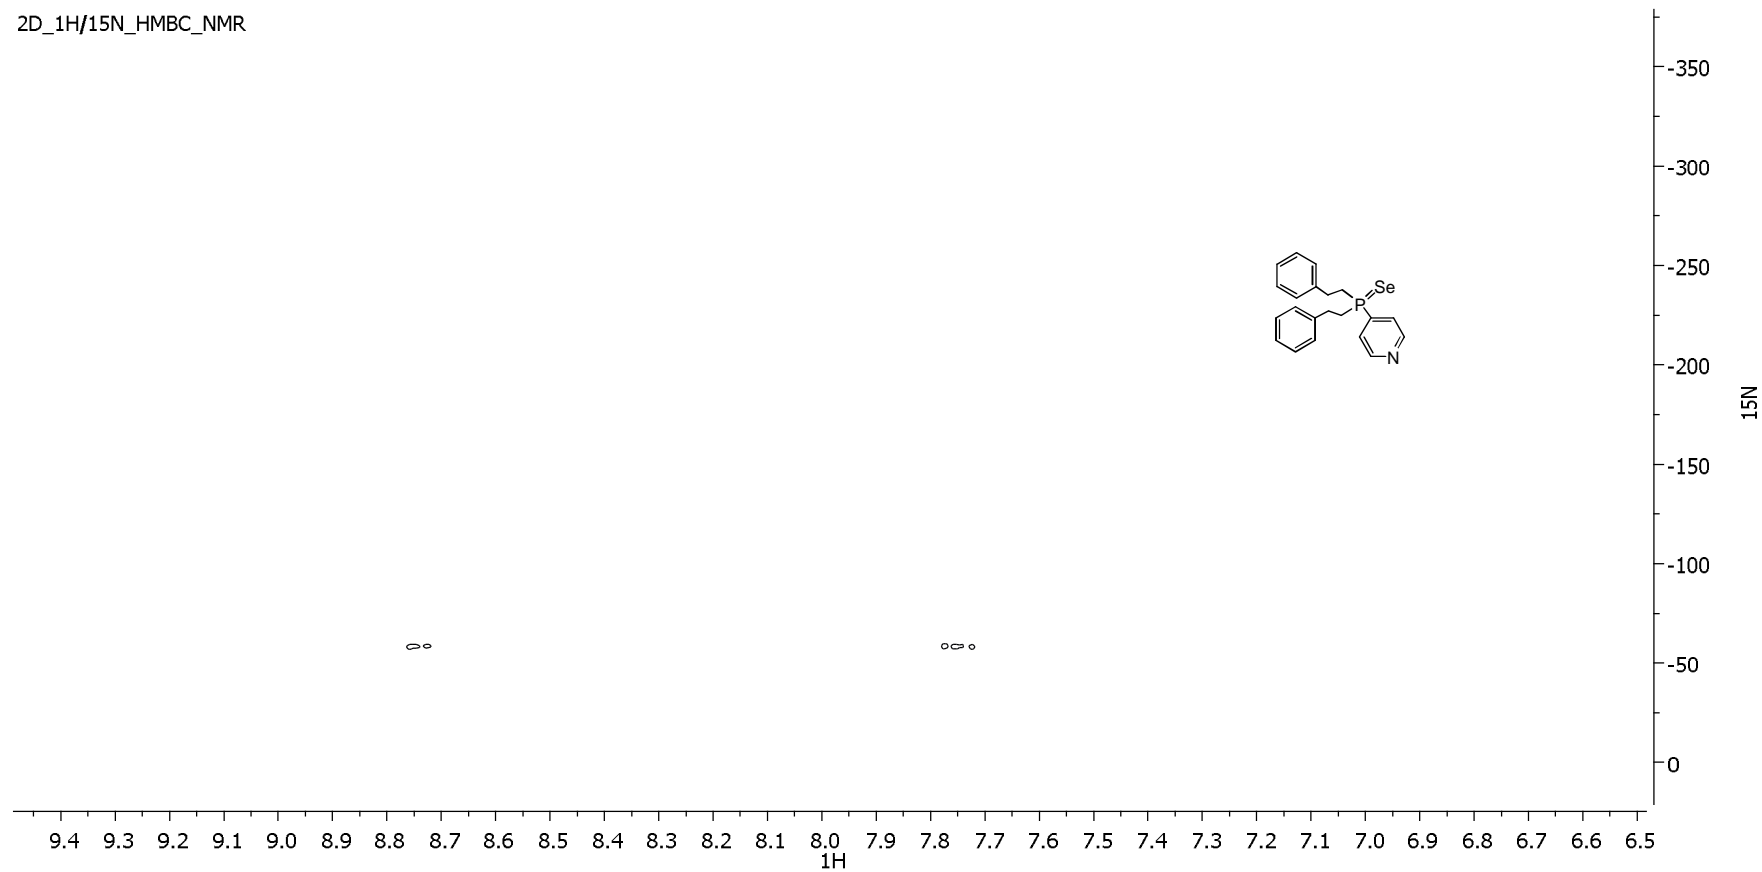

# 4-[Bis(2-phenylpropyl)phosphoroselenoyl]pyridine (4j)

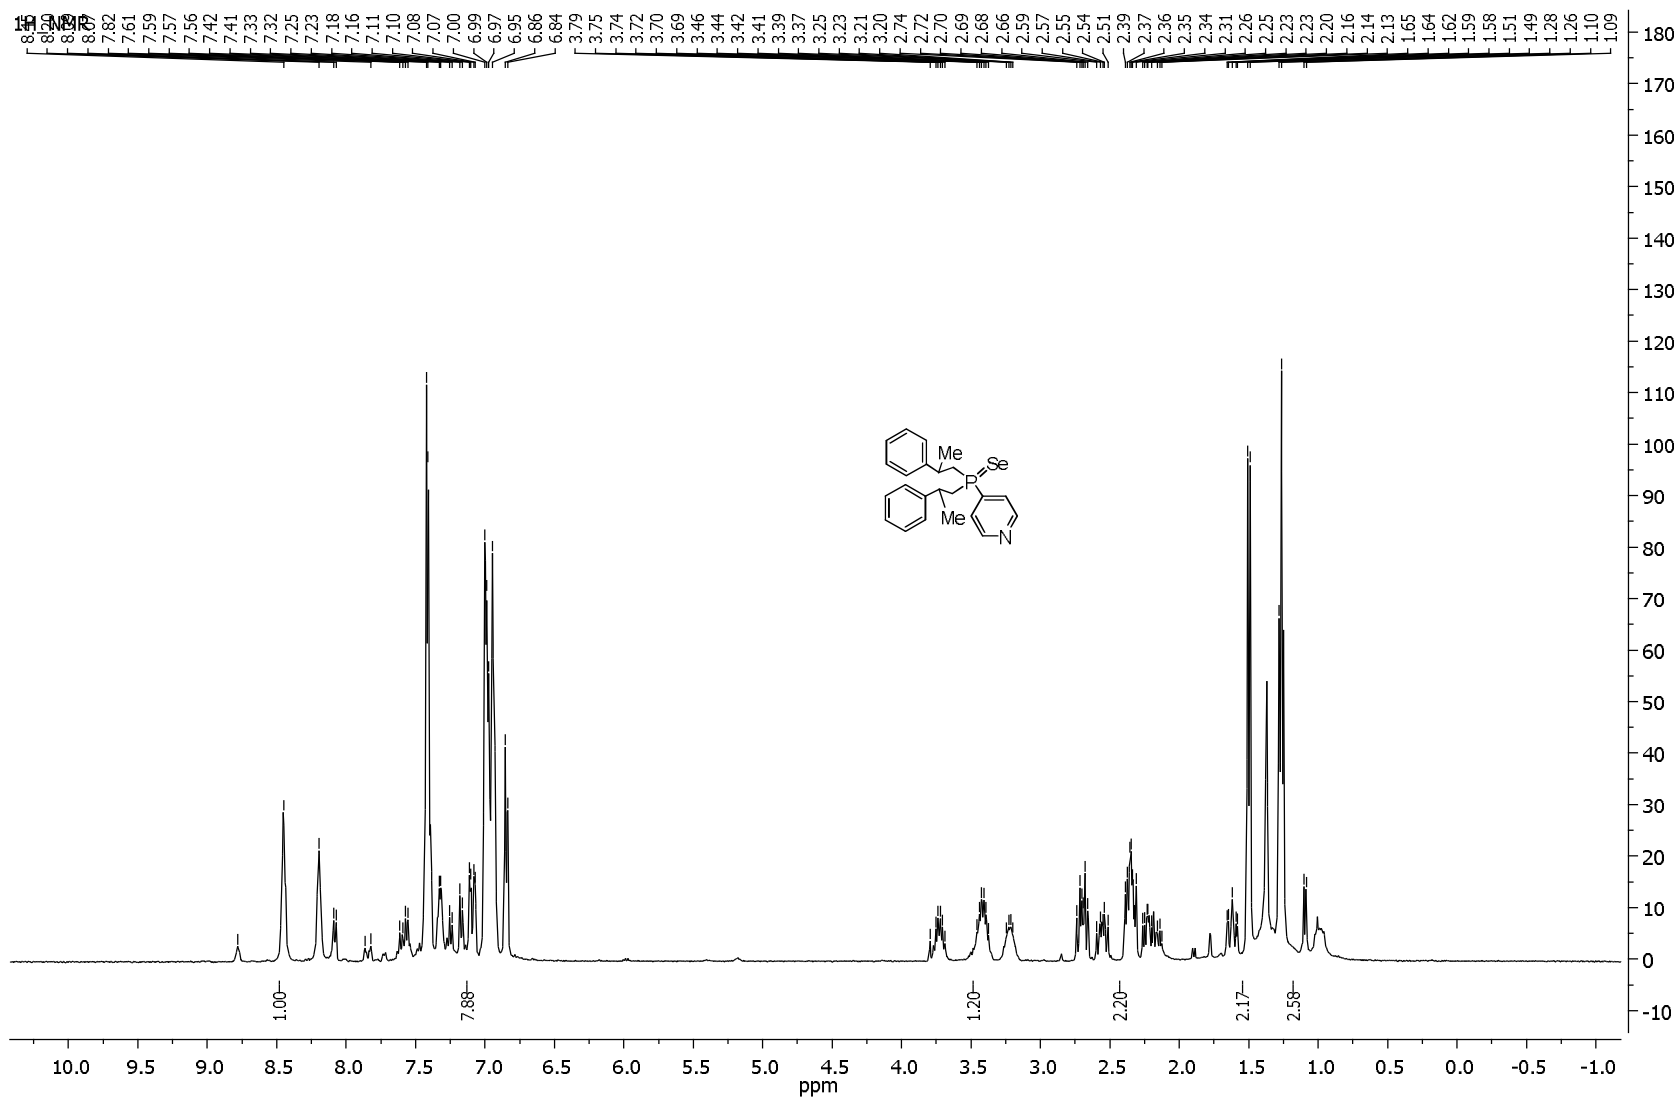

# 4-[Bis(2-phenylpropyl)phosphoroselenoyl]pyridine (4j)

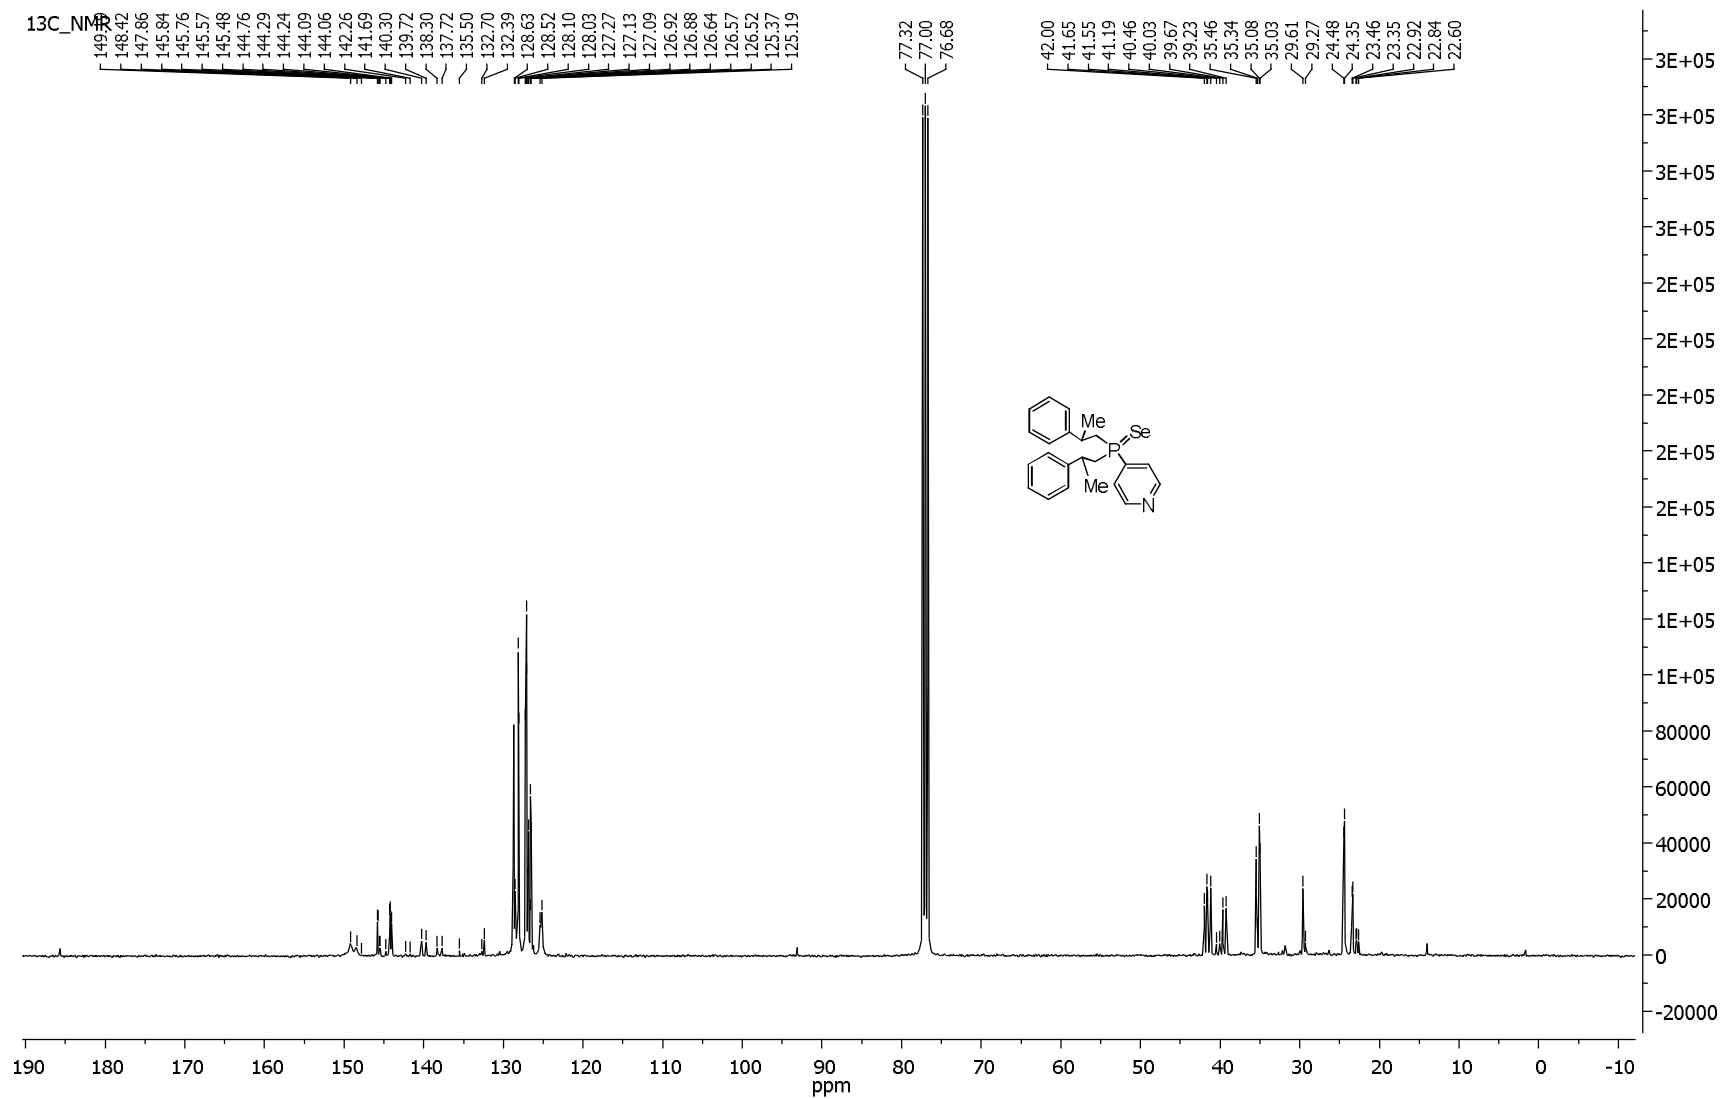

# 4-[Bis(2-phenylpropyl)phosphoroselenoyl]pyridine (4j)

31P\_NMR

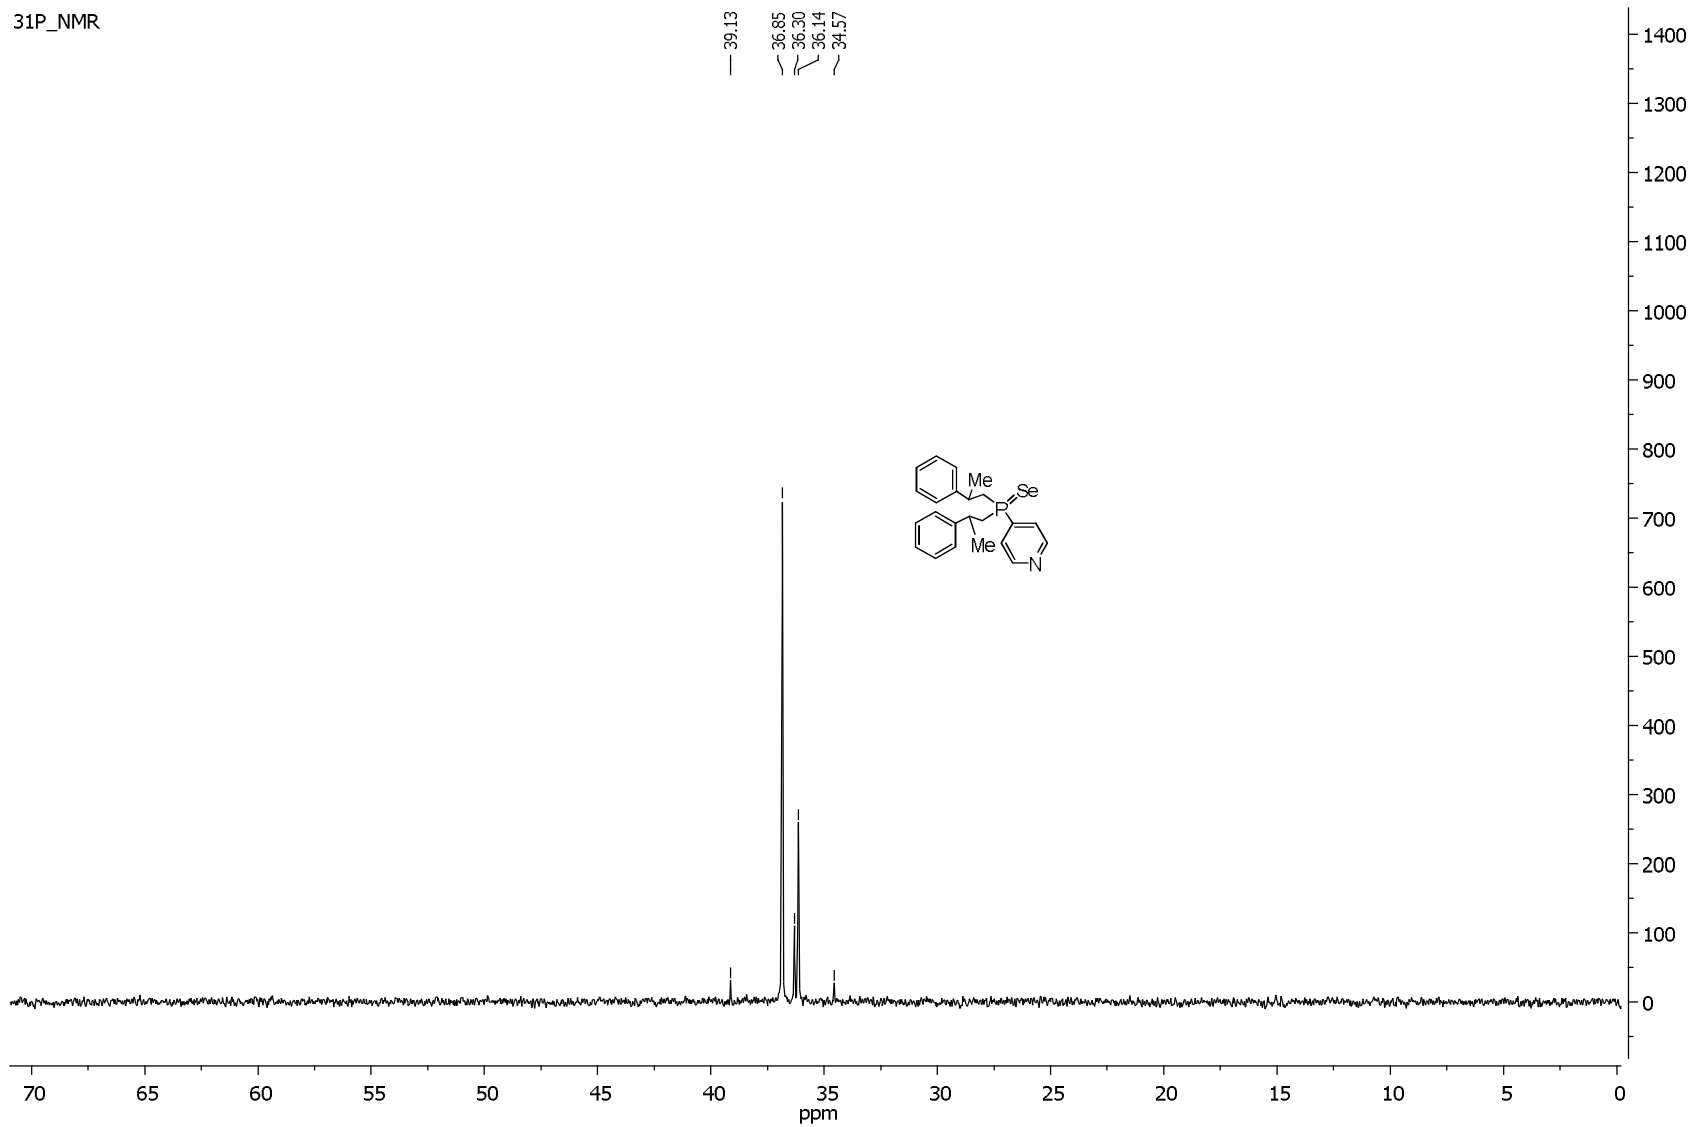

# 4-[Bis(2-phenylpropyl)phosphoroselenoyl]pyridine (4j)

<sup>77</sup>Se\_NMR

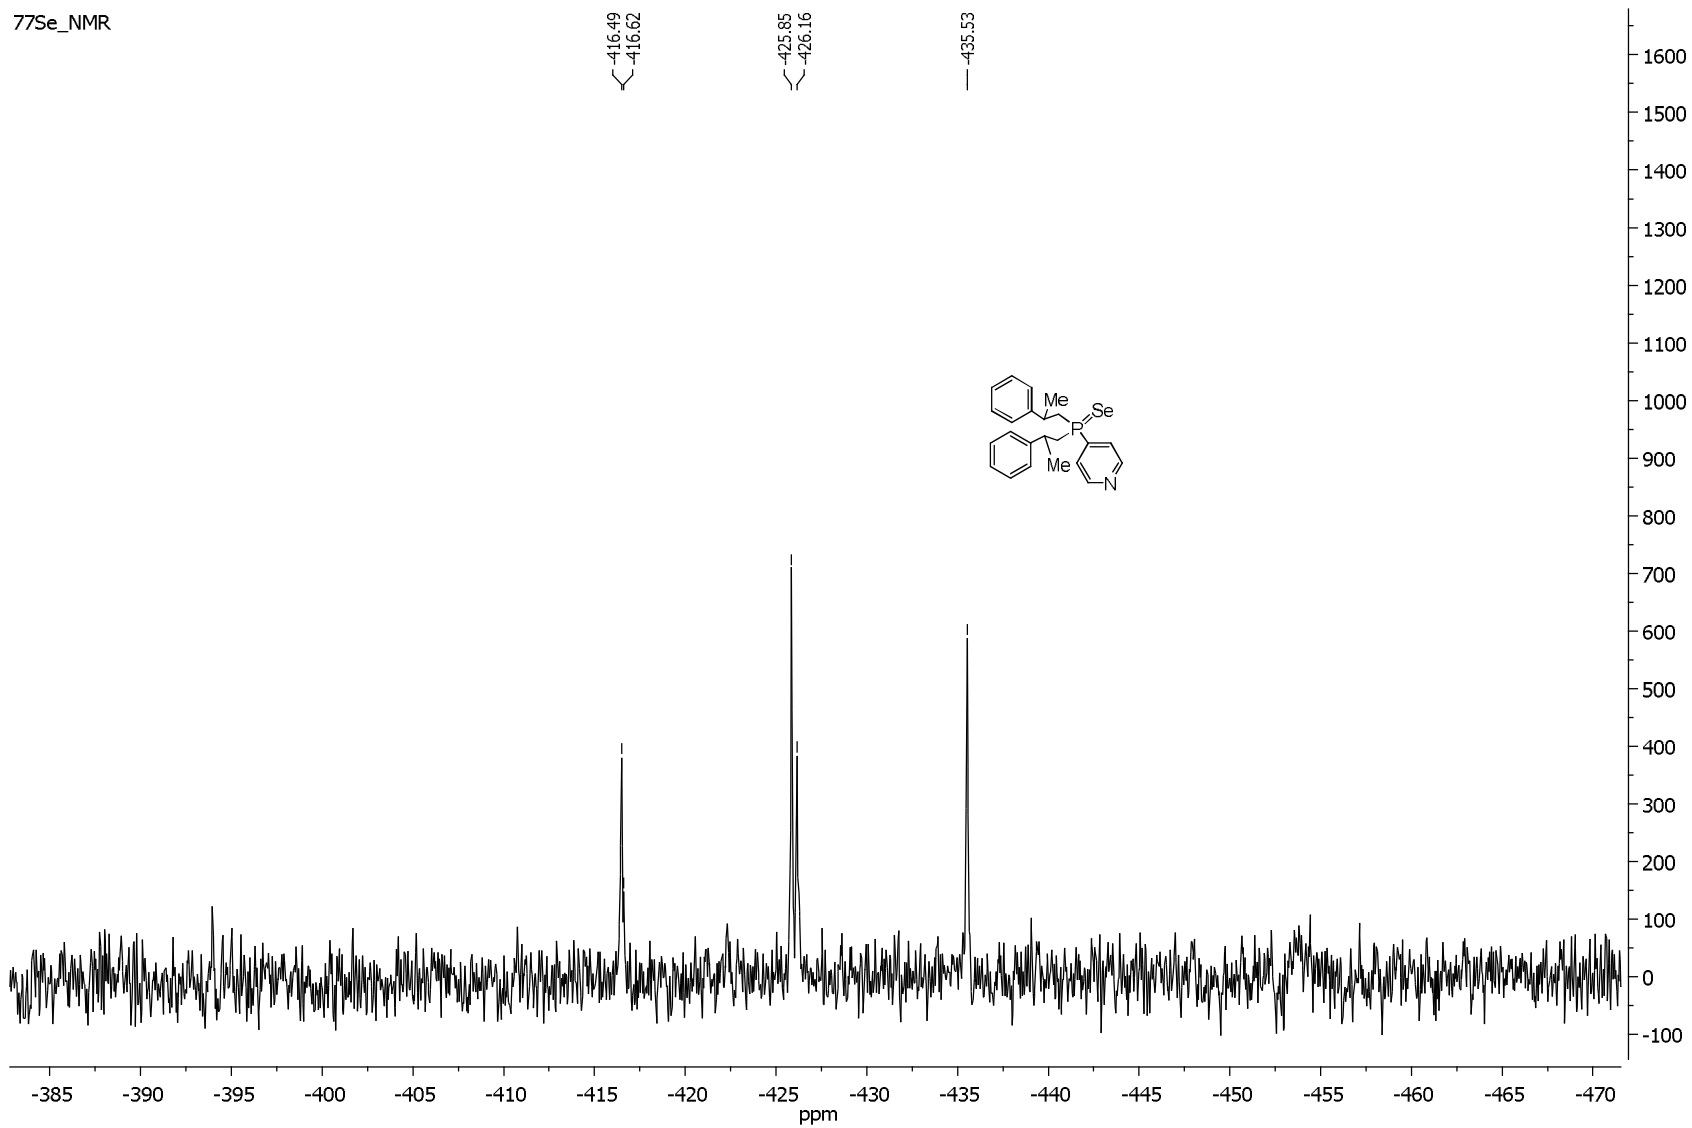

4-[Bis(2-phenylpropyl)phosphoroselenoyl]pyridine (4j)

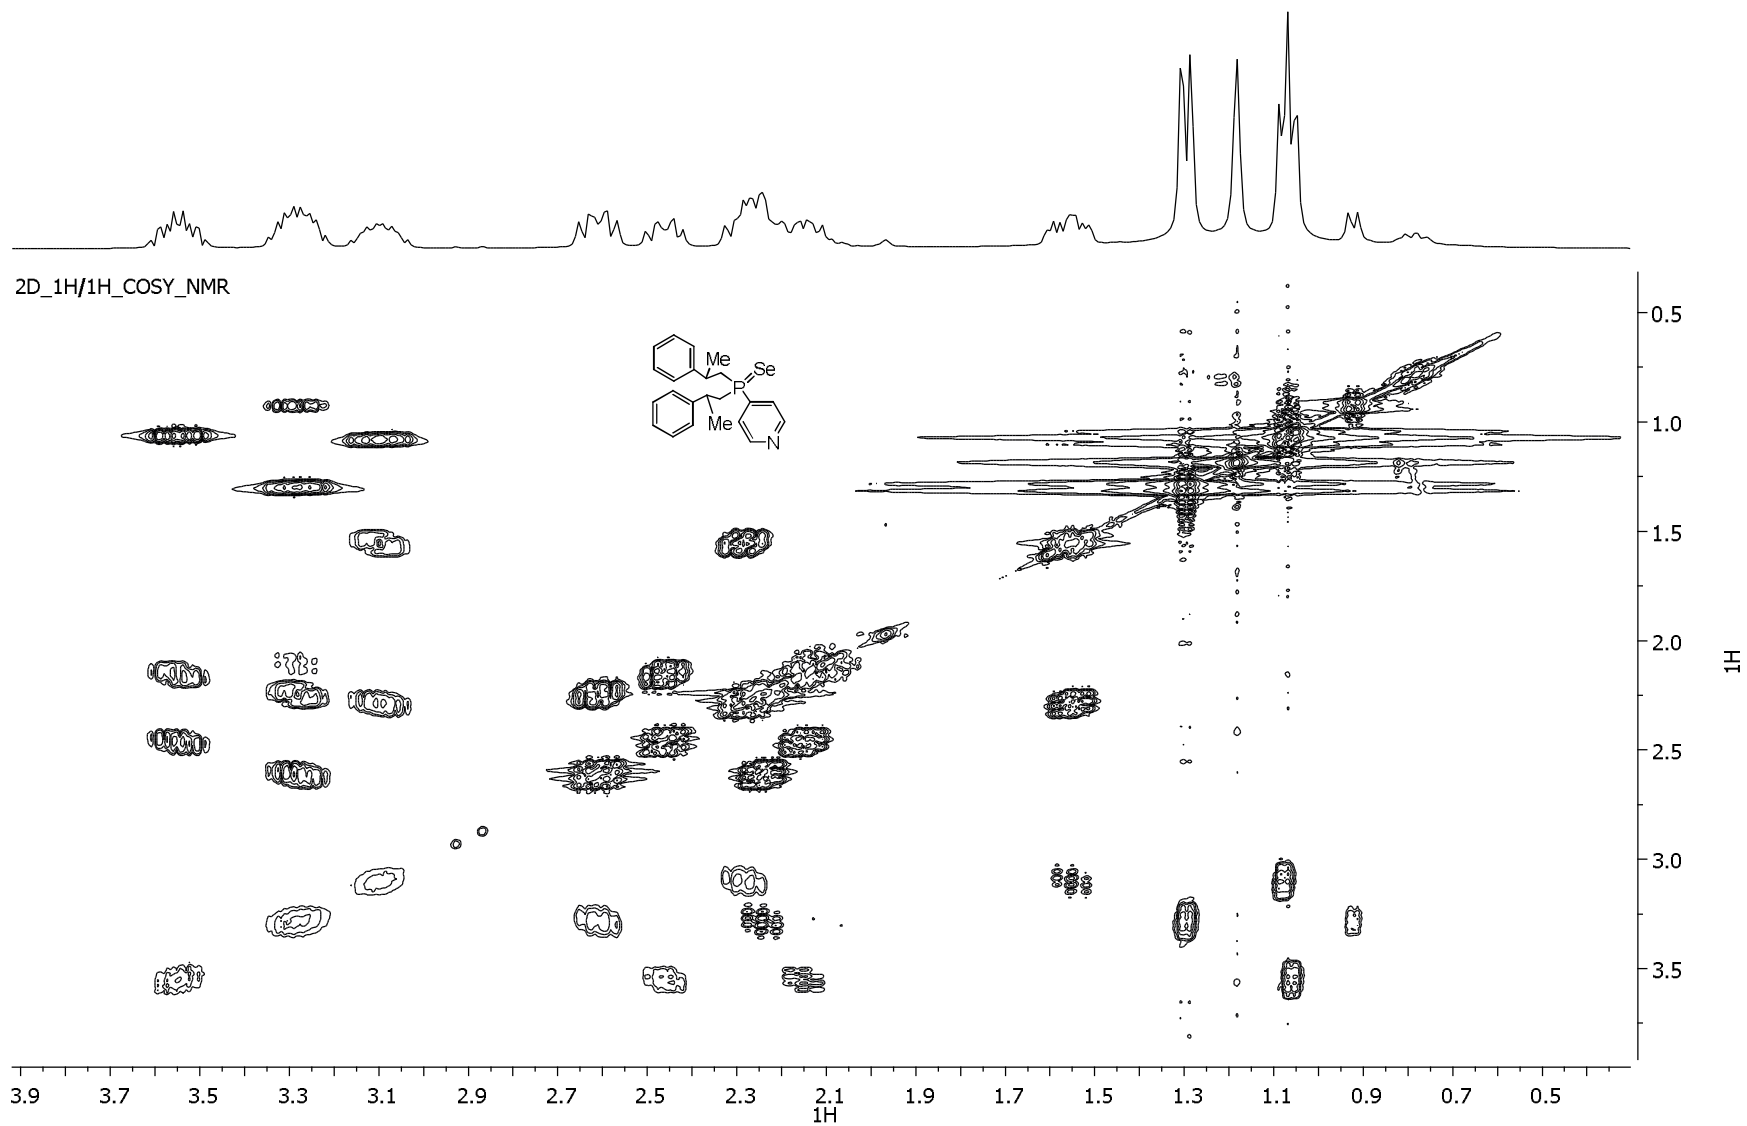



**(2E)-1,3-Diphenylprop-2-en-1-one (5c)**

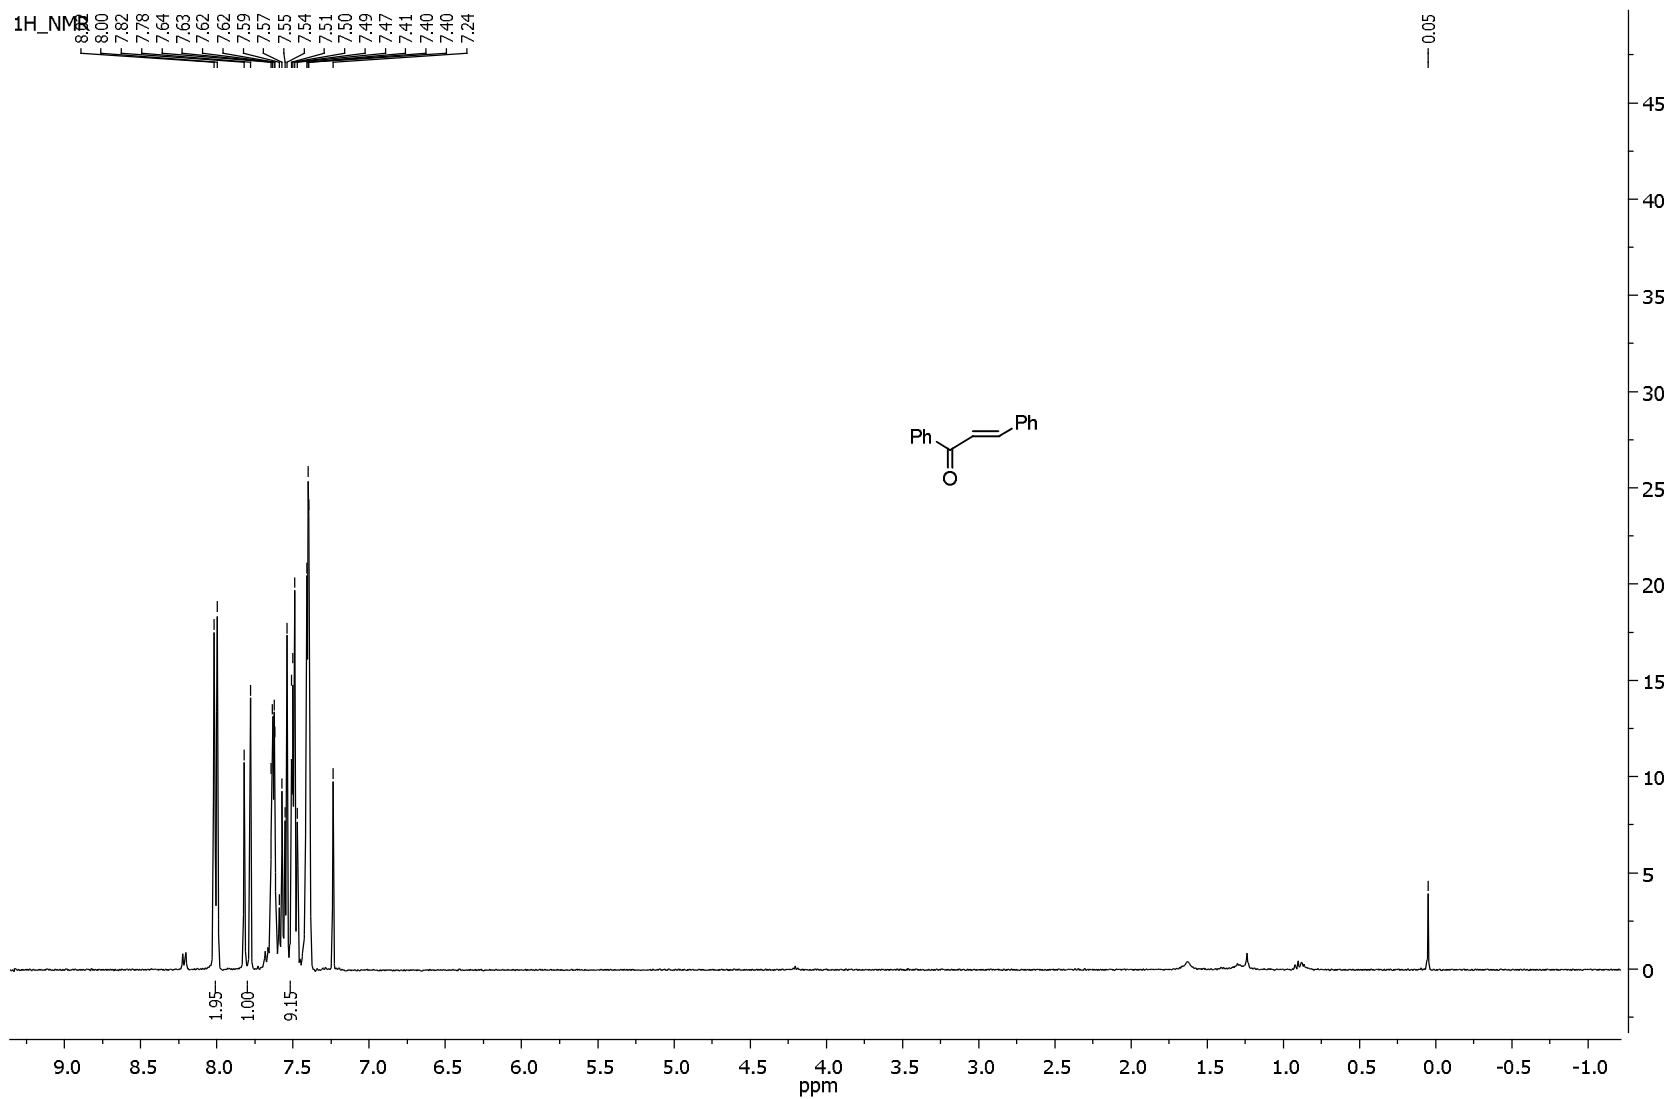

**(2E)-1,3-Diphenylprop-2-en-1-one (5c)**

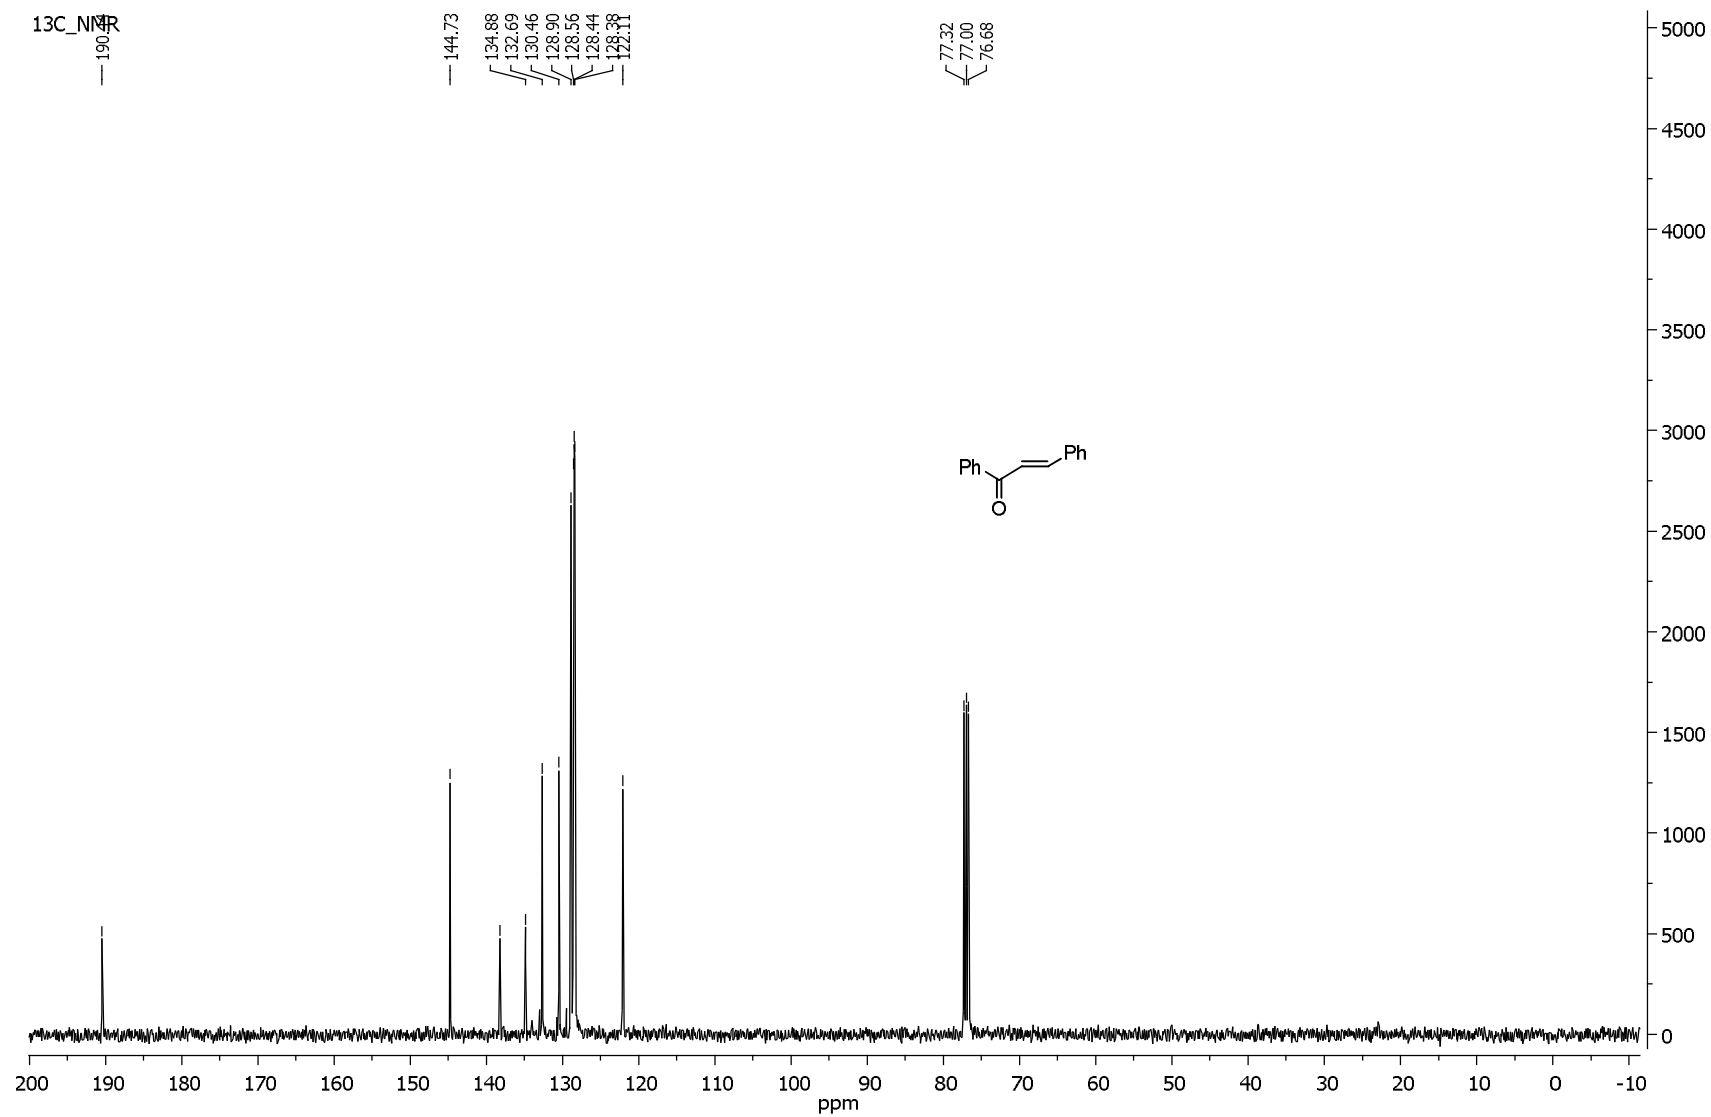

**(2E)-1-(Furan-2-yl)-3-phenylprop-2-en-1-one (5d)**

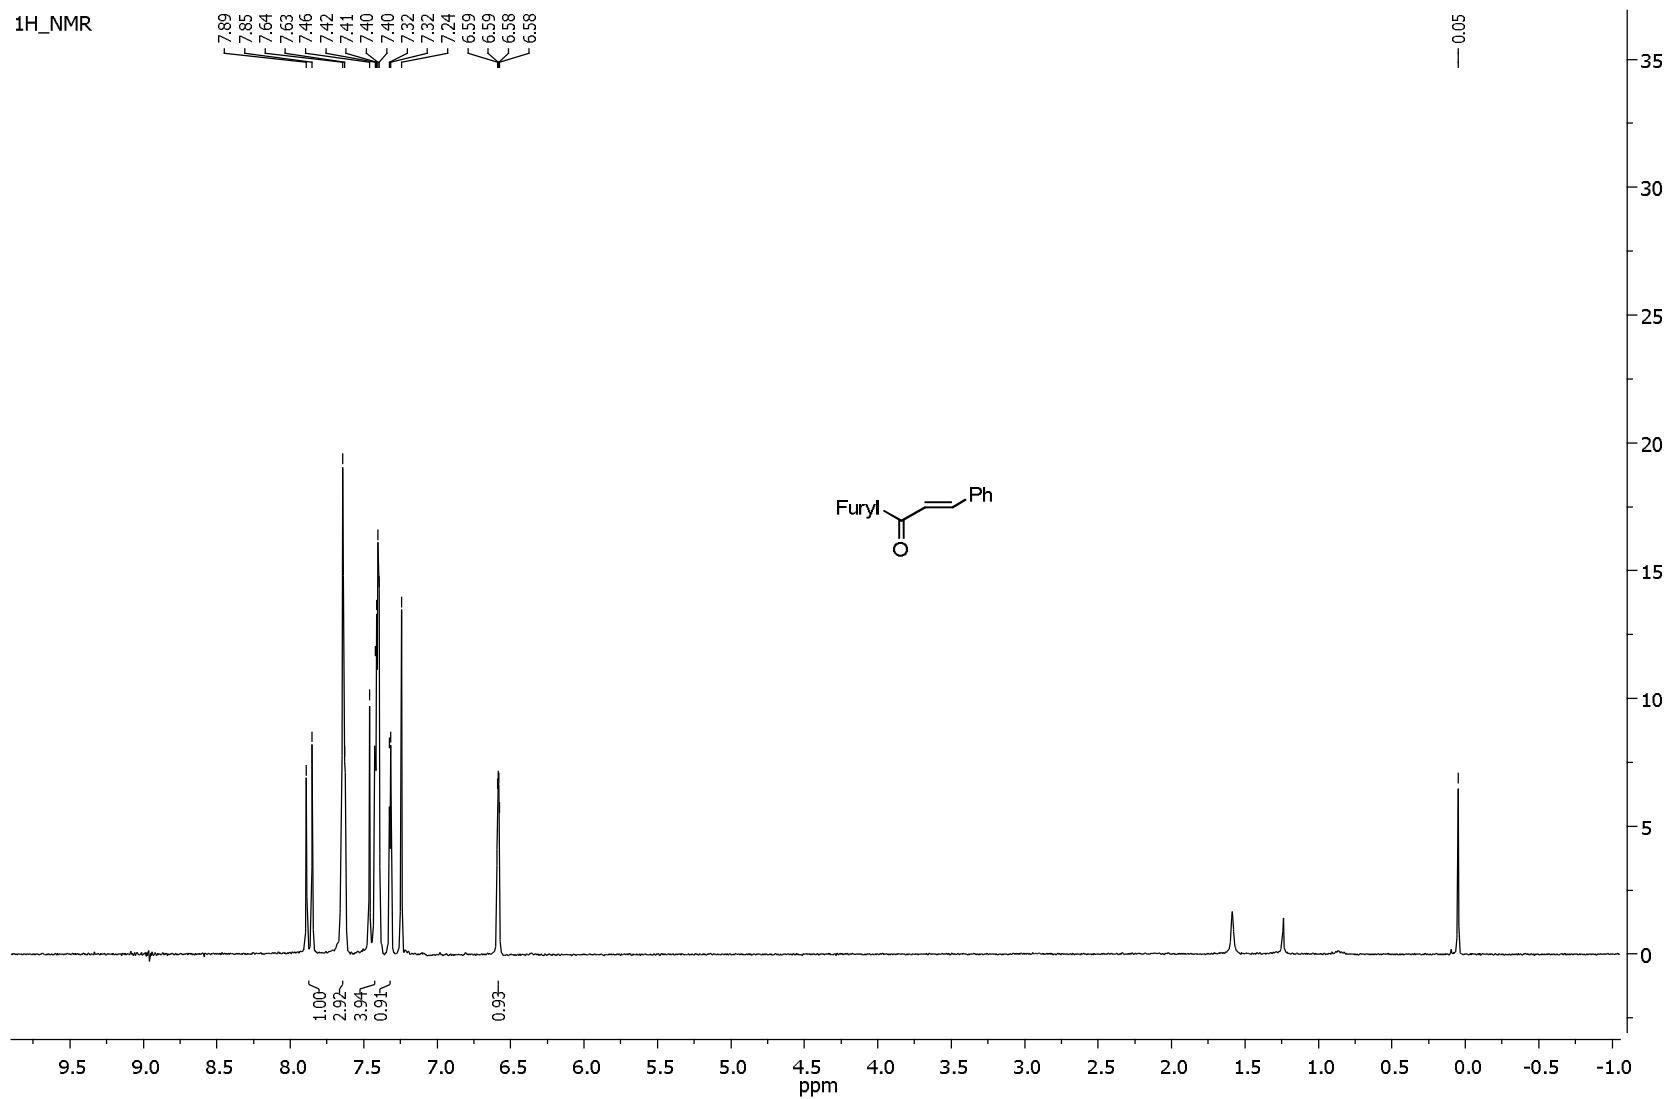

**(2E)-1-(Furan-2-yl)-3-phenylprop-2-en-1-one (5d)**

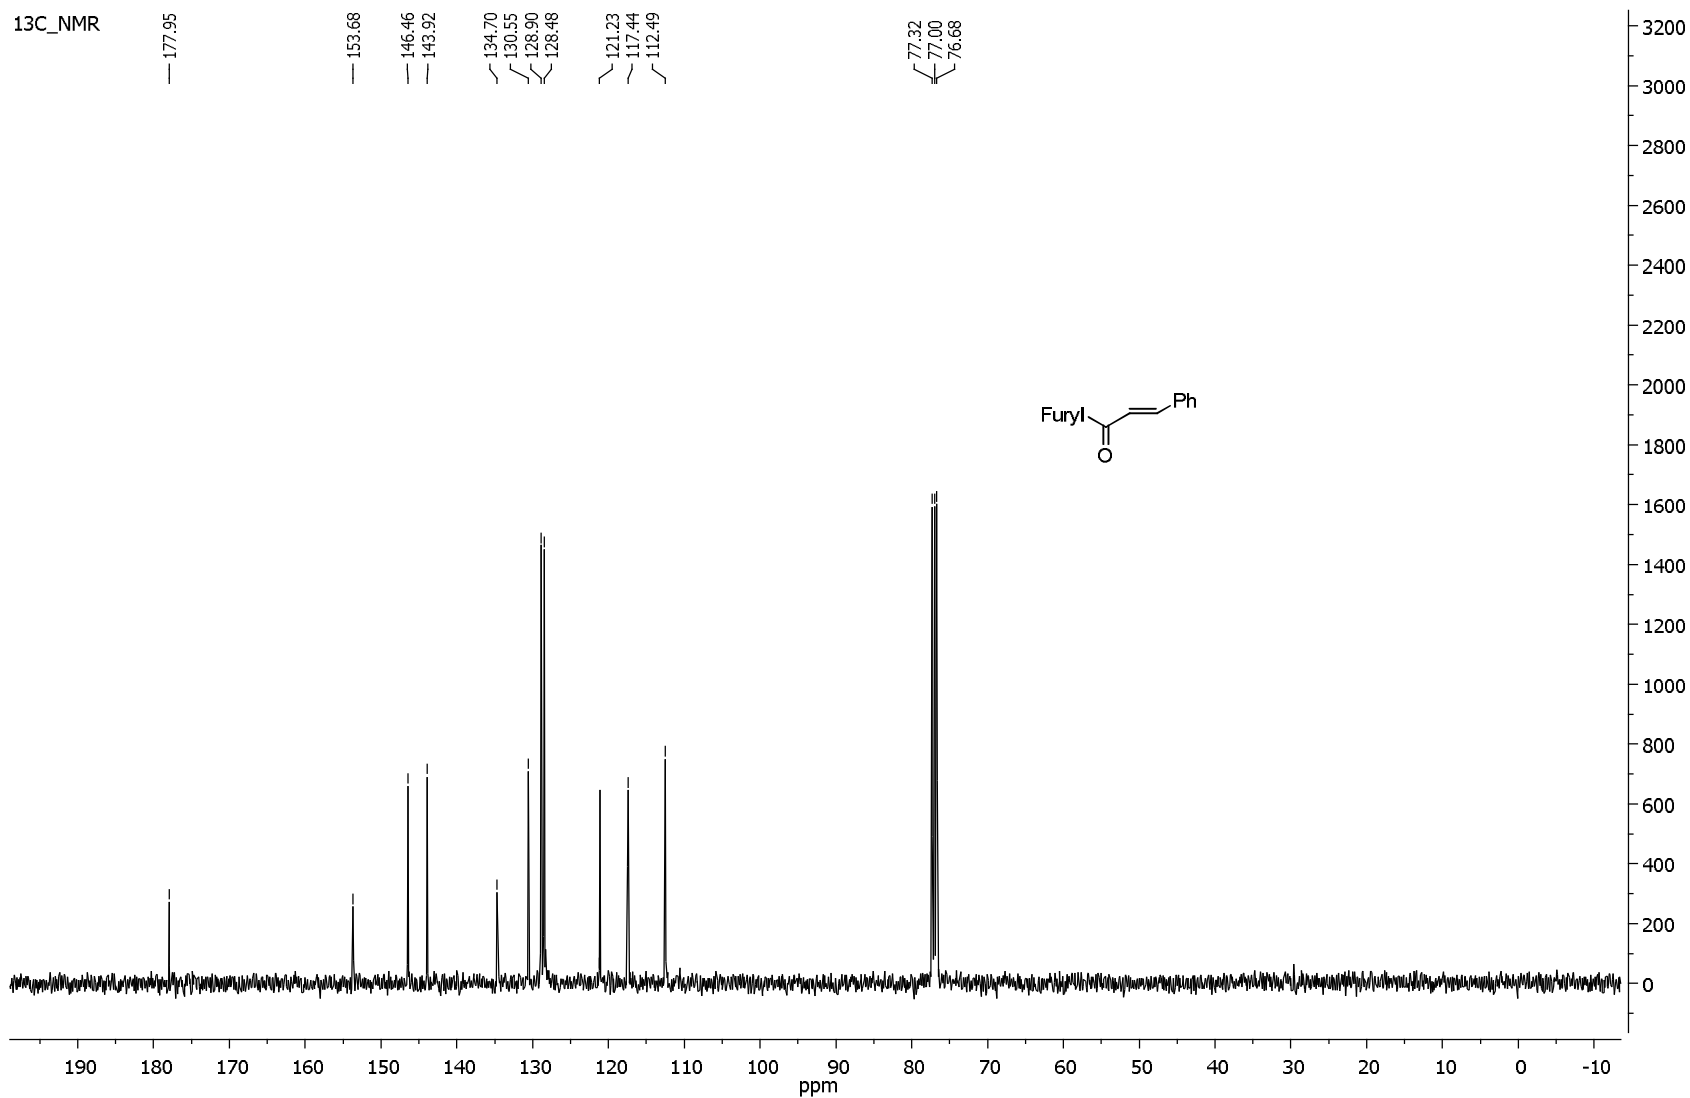

# 4-(Diphenylphosphoryl)-3-methylpyridine (6a)

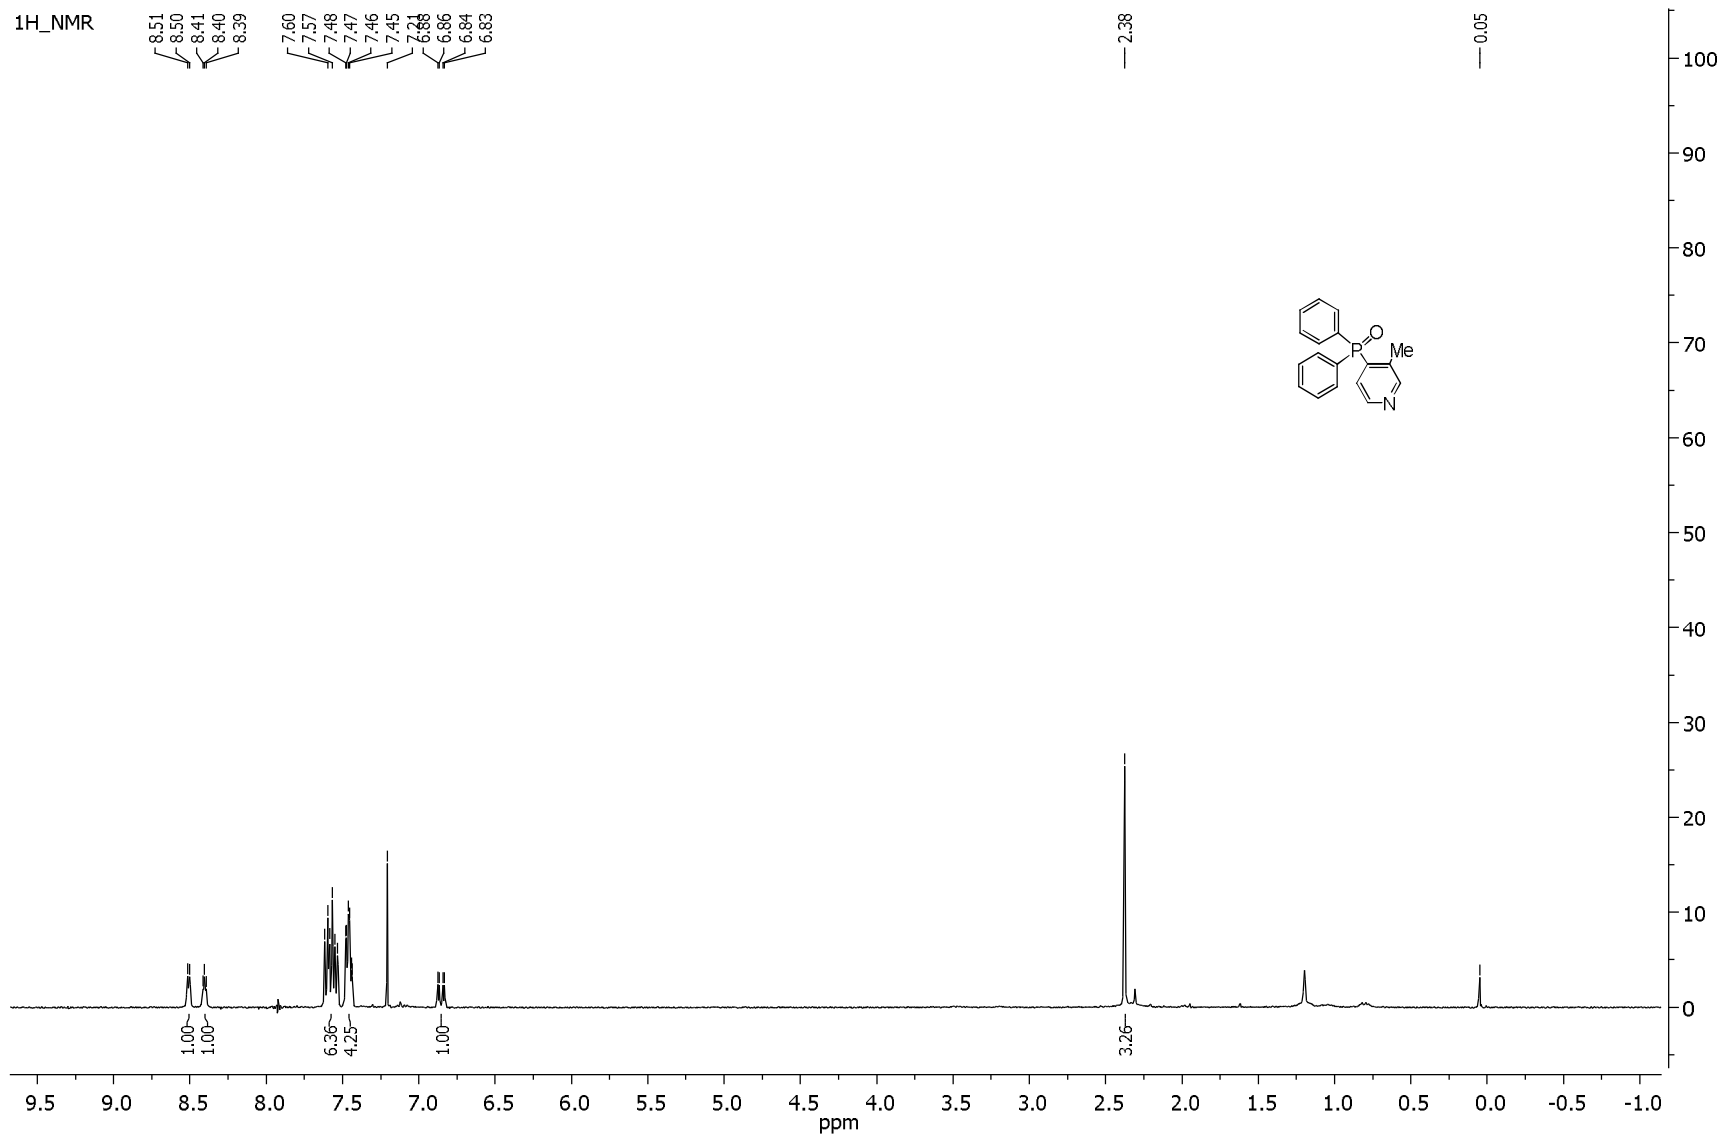

# 4-(Diphenylphosphoryl)-3-methylpyridine (6a)

<sup>13</sup>C\_NMR

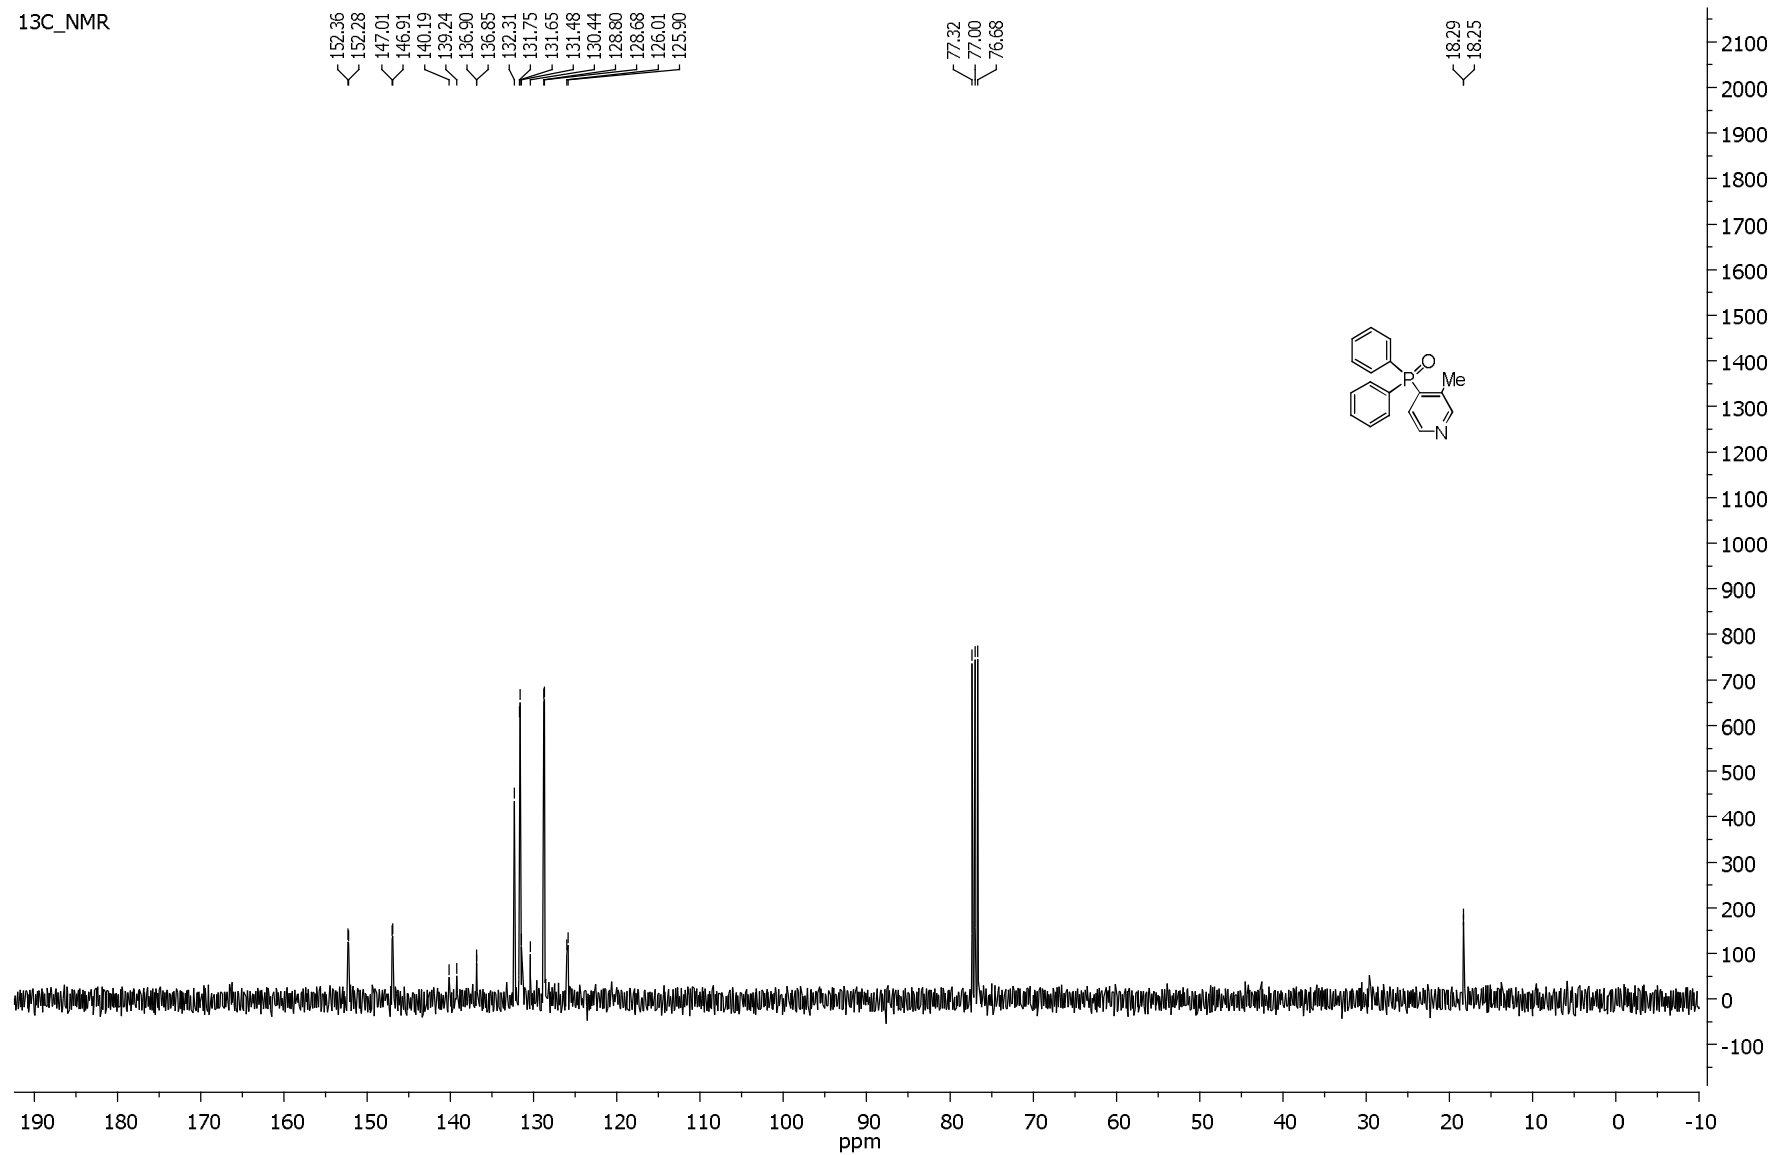

# 4-(Diphenylphosphoryl)-3-methylpyridine (6a)

31P\_NMR

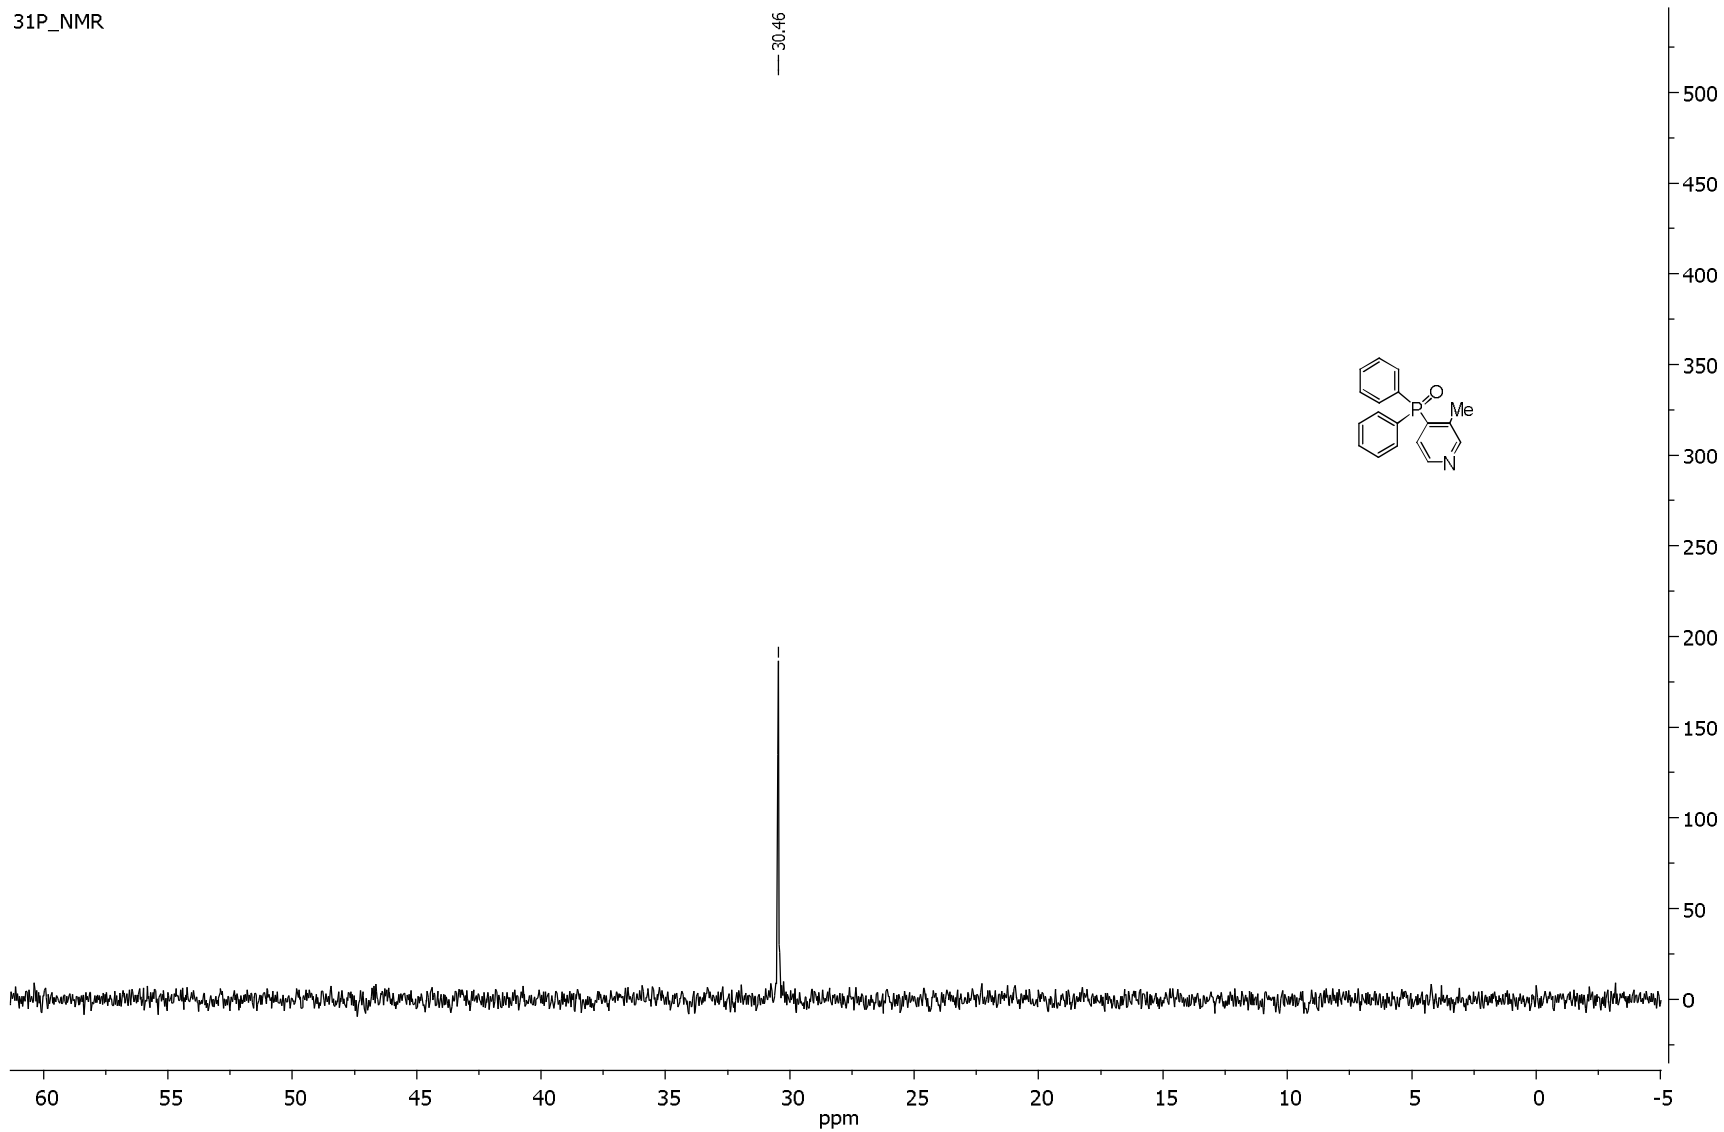

**4-(Diphenylphosphoryl)-3-methylpyridine (6a)**

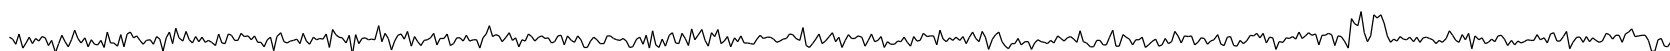

2D\_1H/15N\_HMBC\_NMR

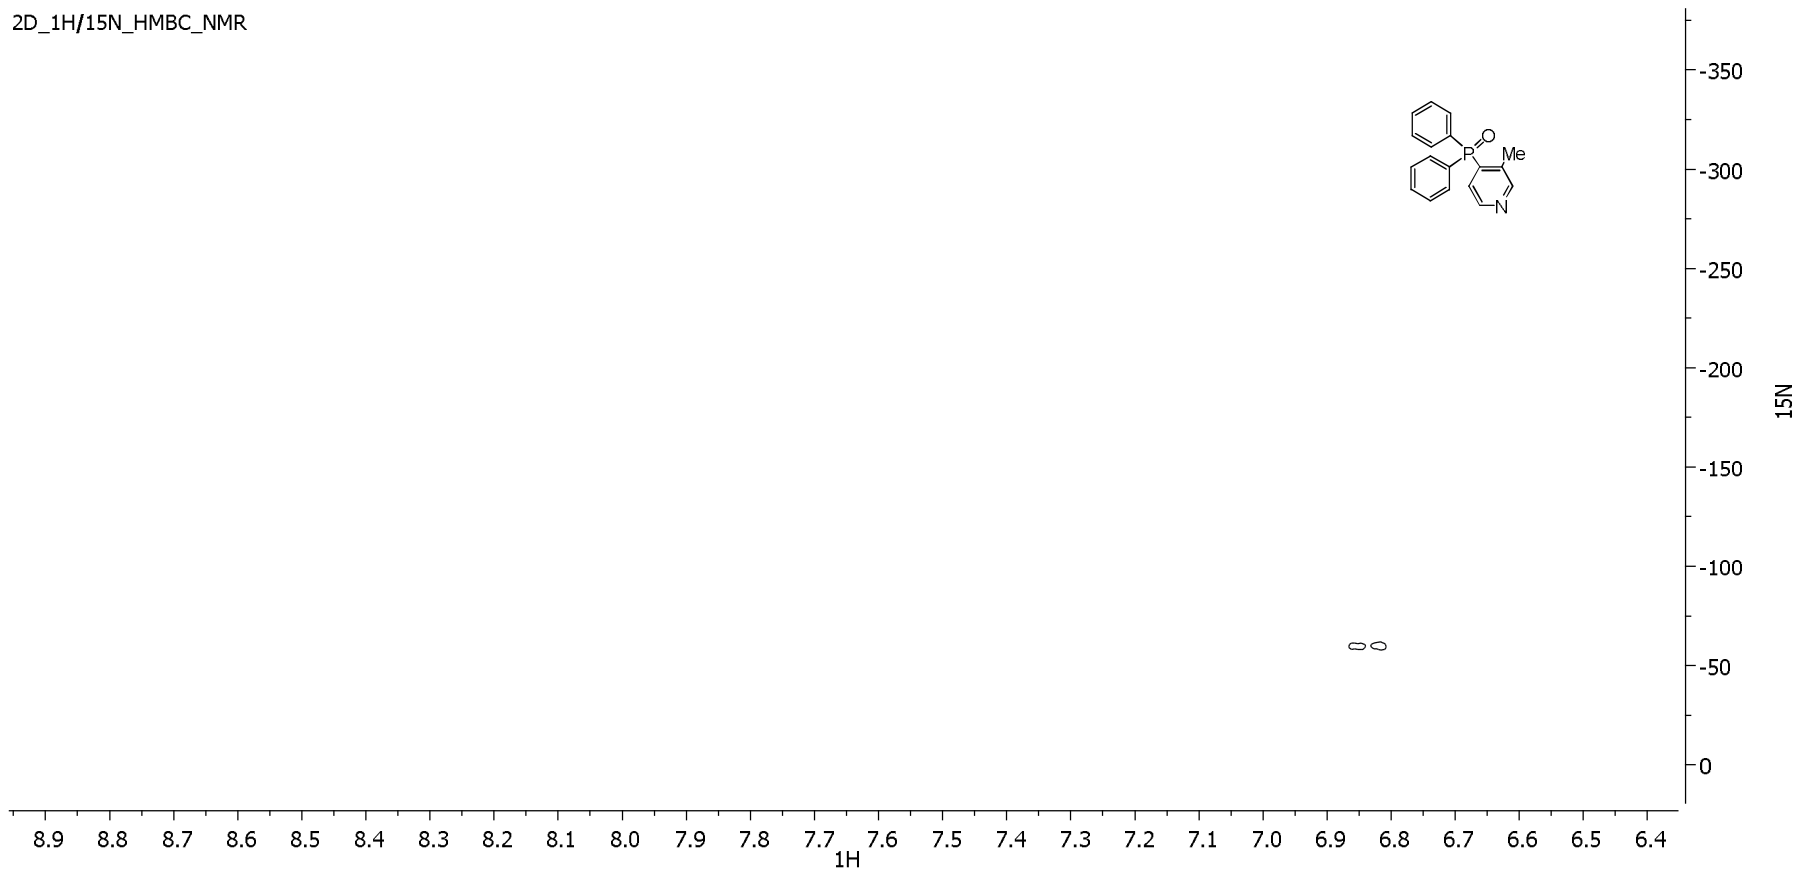



# 4-[Bis(2-phenylethyl)phosphoryl]-3-methylpyridine (6b)

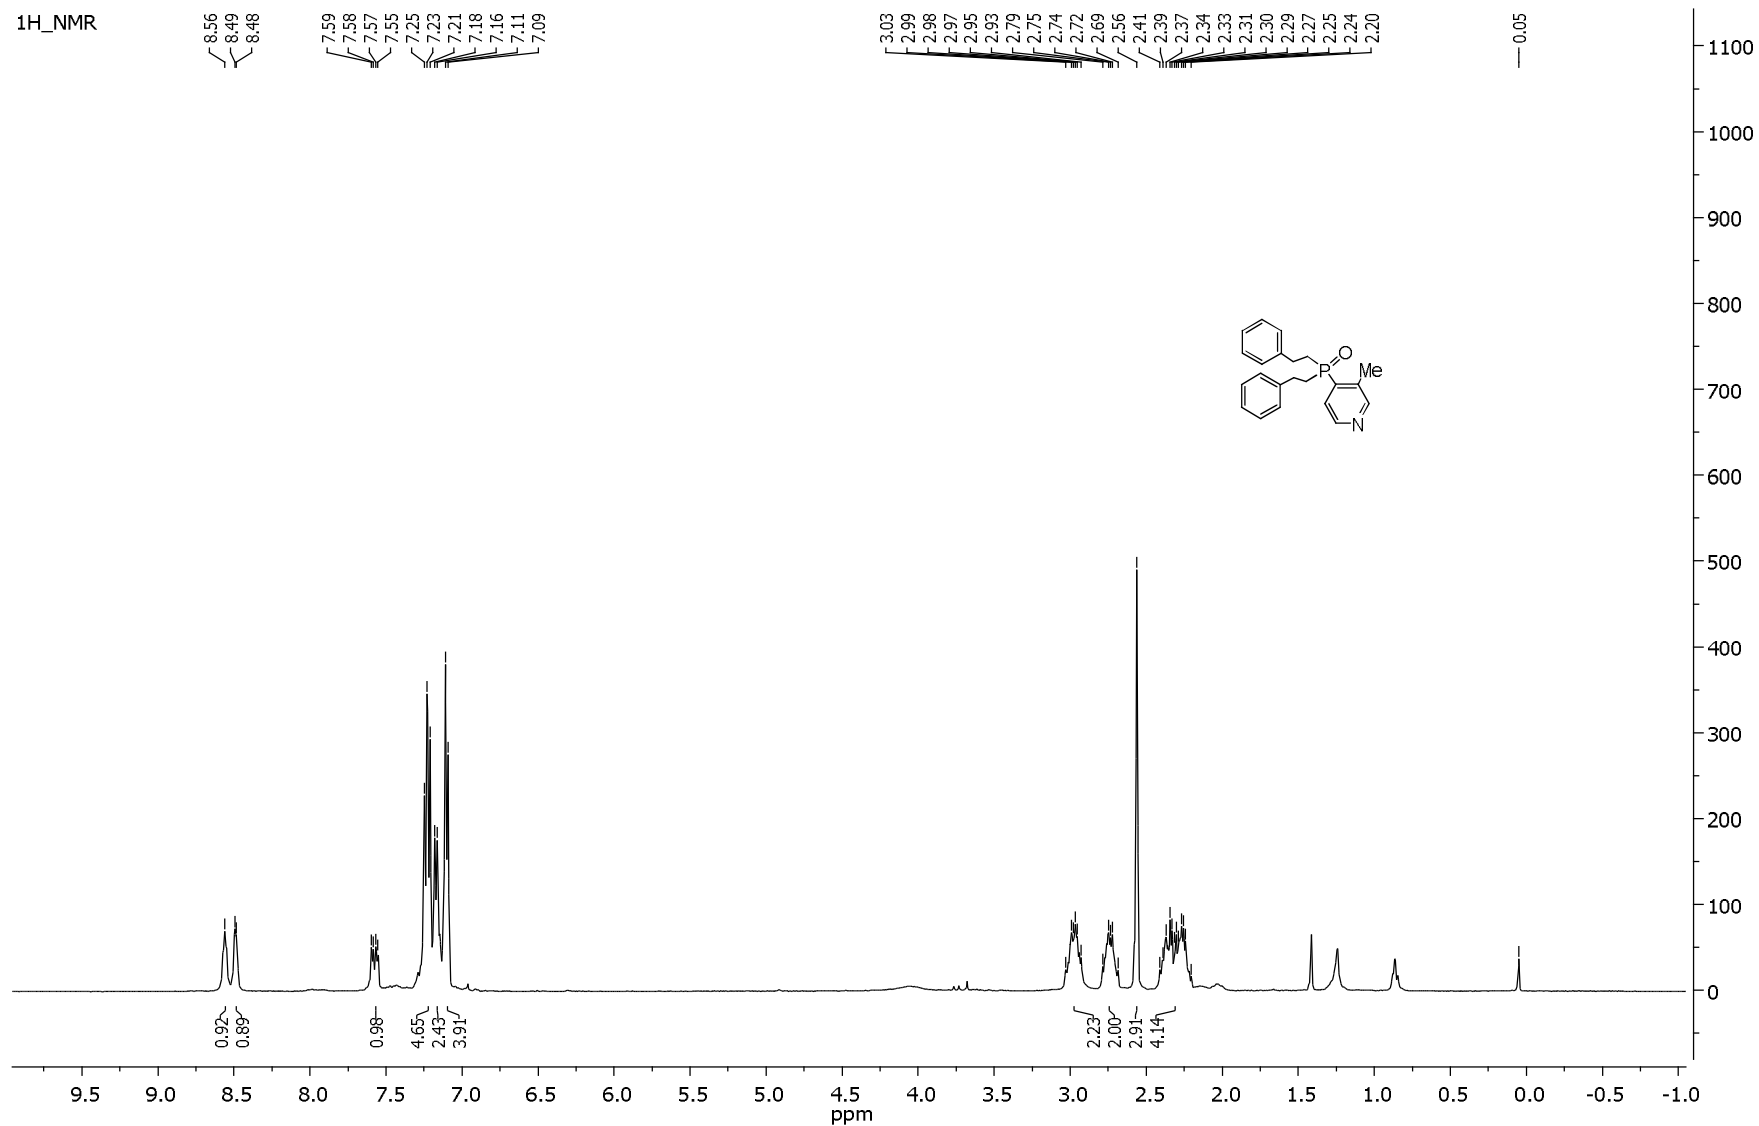

# 4-[Bis(2-phenylethyl)phosphoryl]-3-methylpyridine (6b)

13C\_NMR

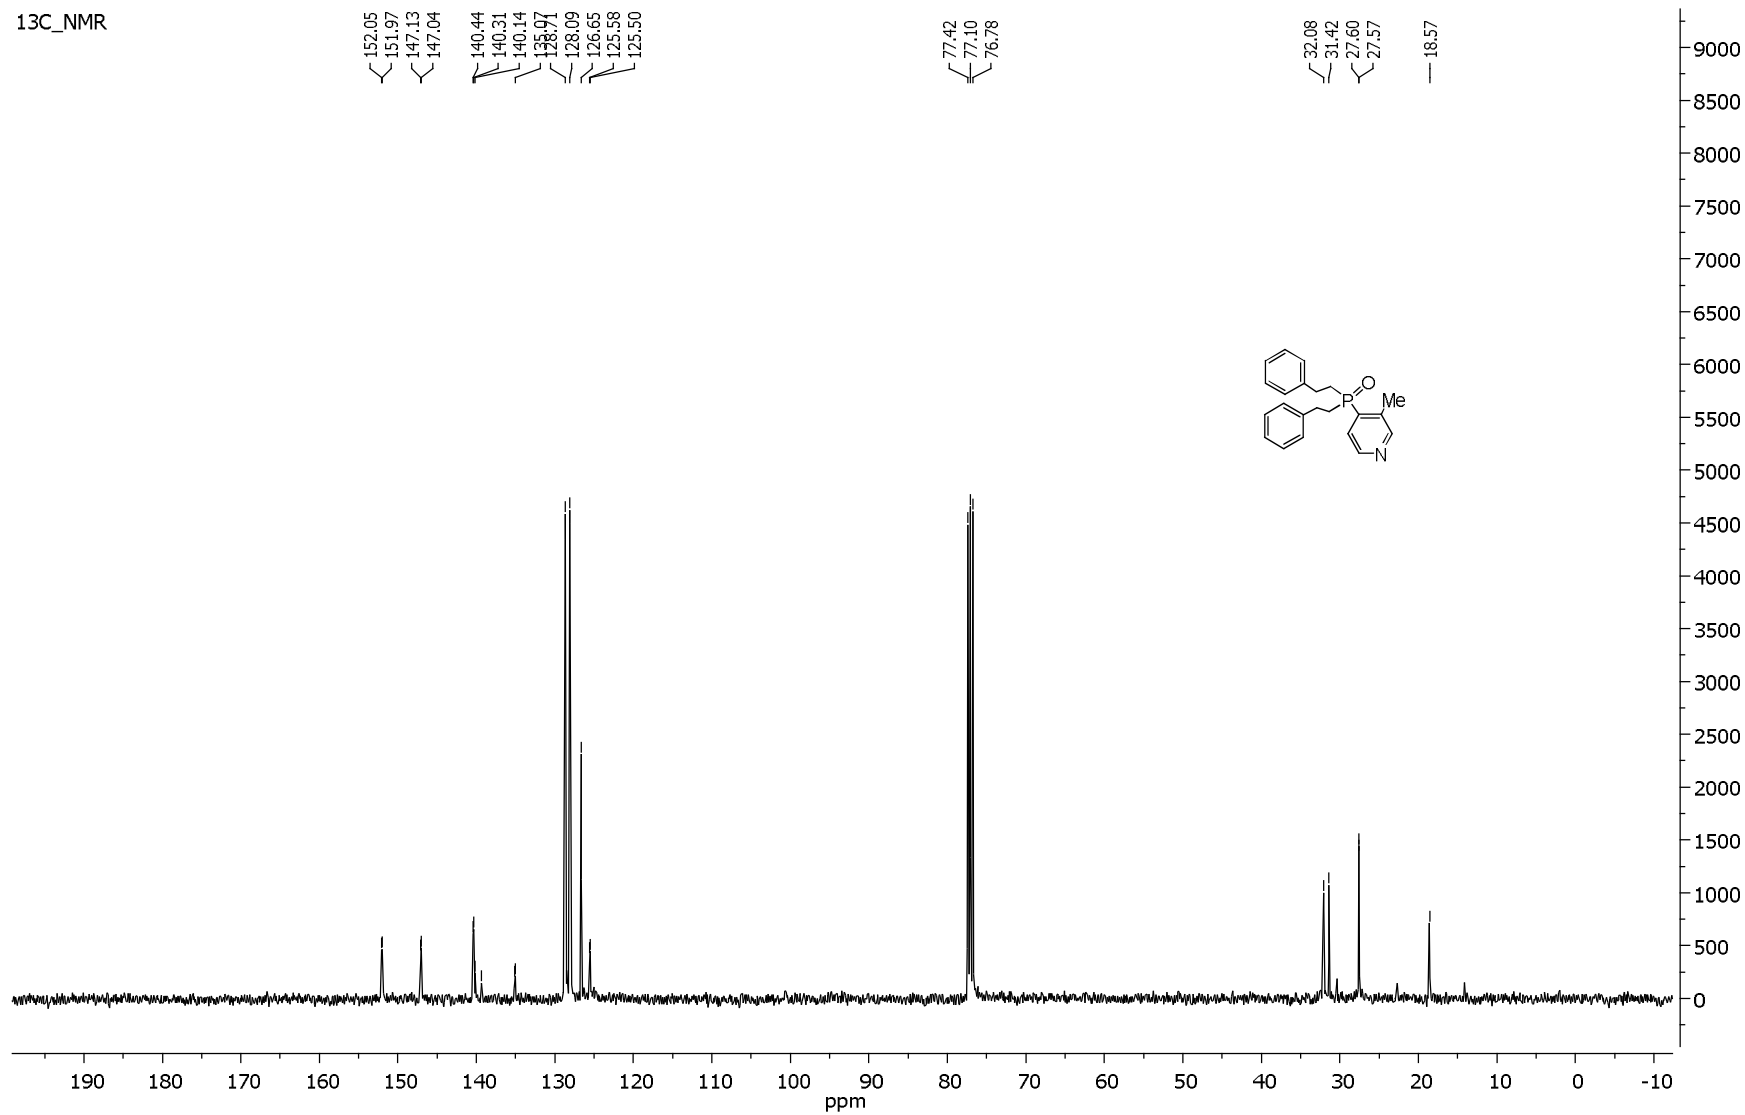

4-[Bis(2-phenylethyl)phosphoryl]-3-methylpyridine (6b)

31P\_NMR

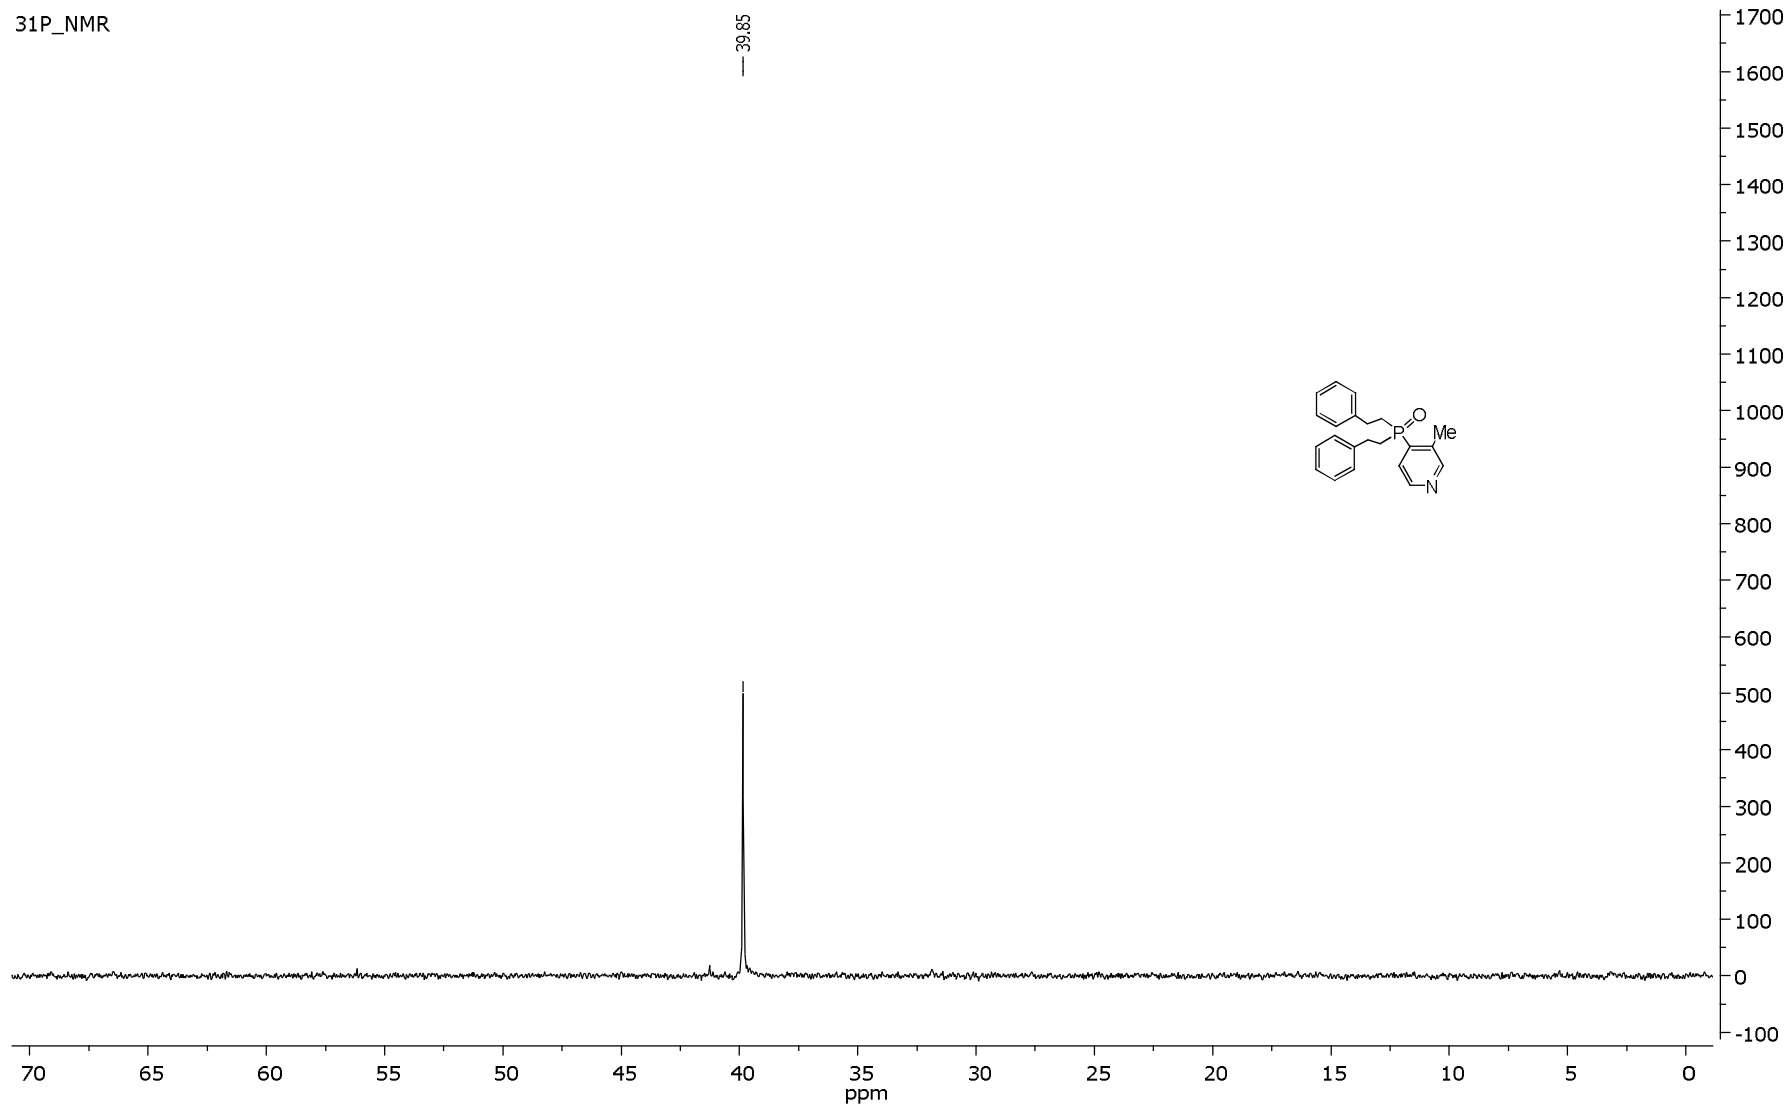

4-[Bis(2-phenylethyl)phosphoryl]-3-methylpyridine (6b)

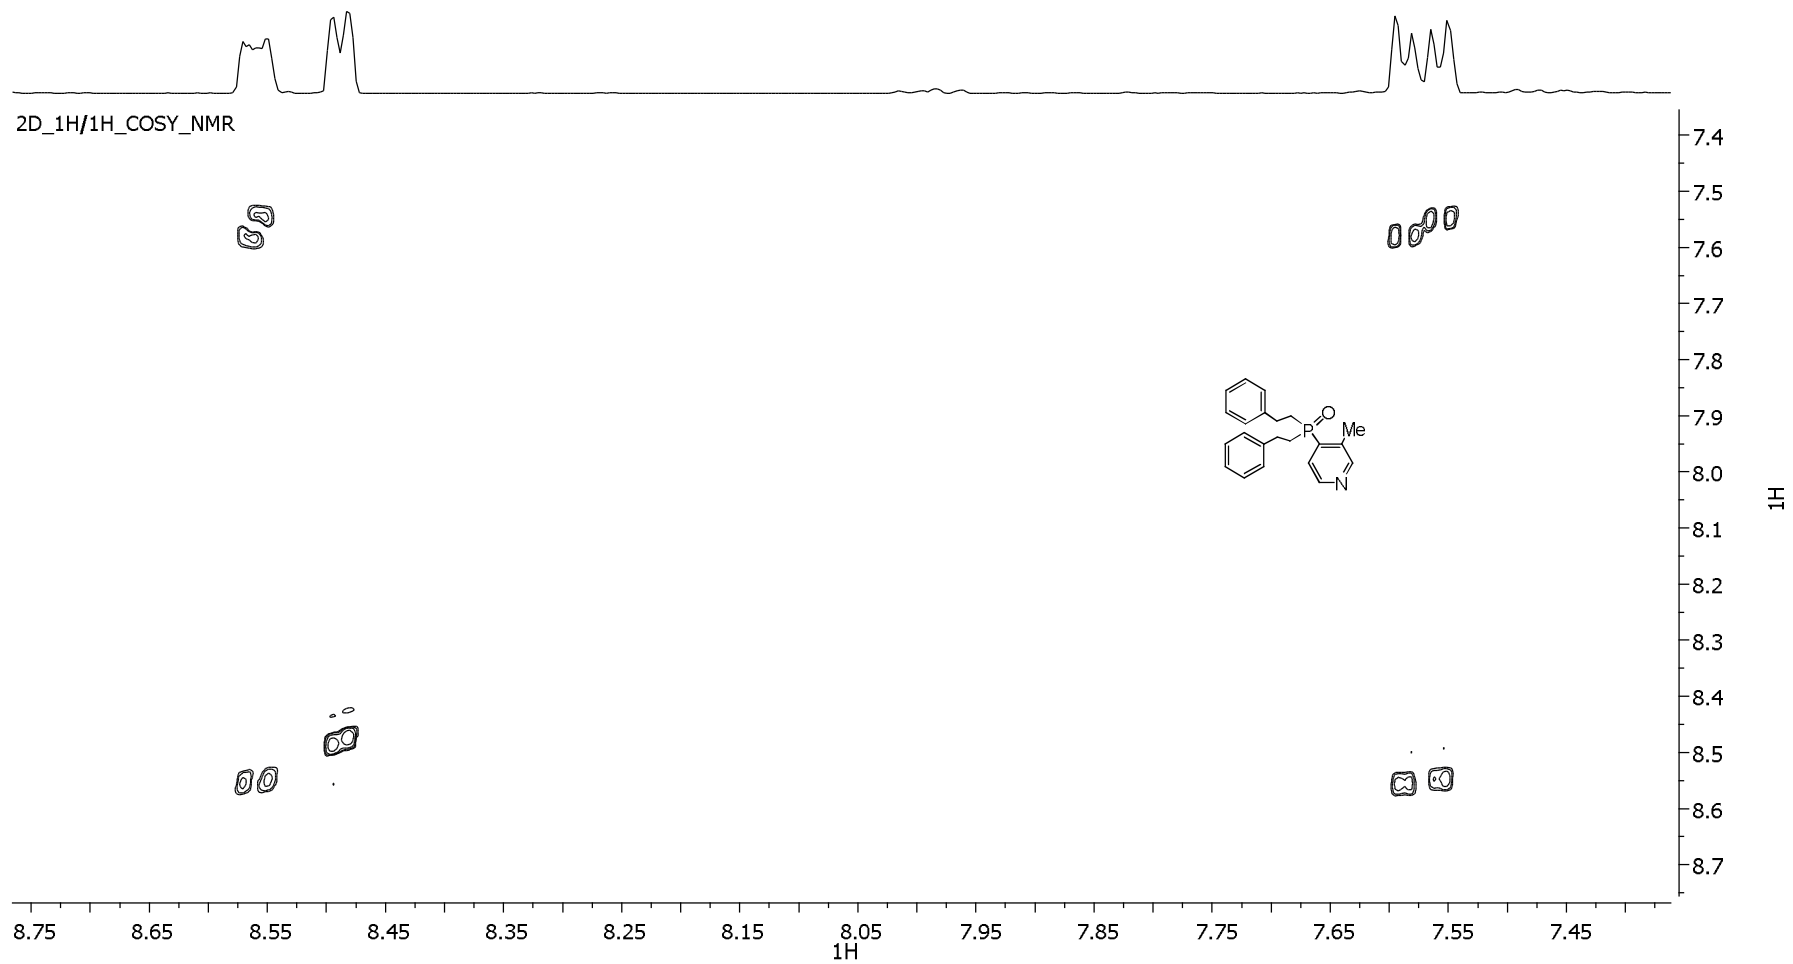

4-[Bis(2-phenylethyl)phosphoryl]-3-methylpyridine (6b)

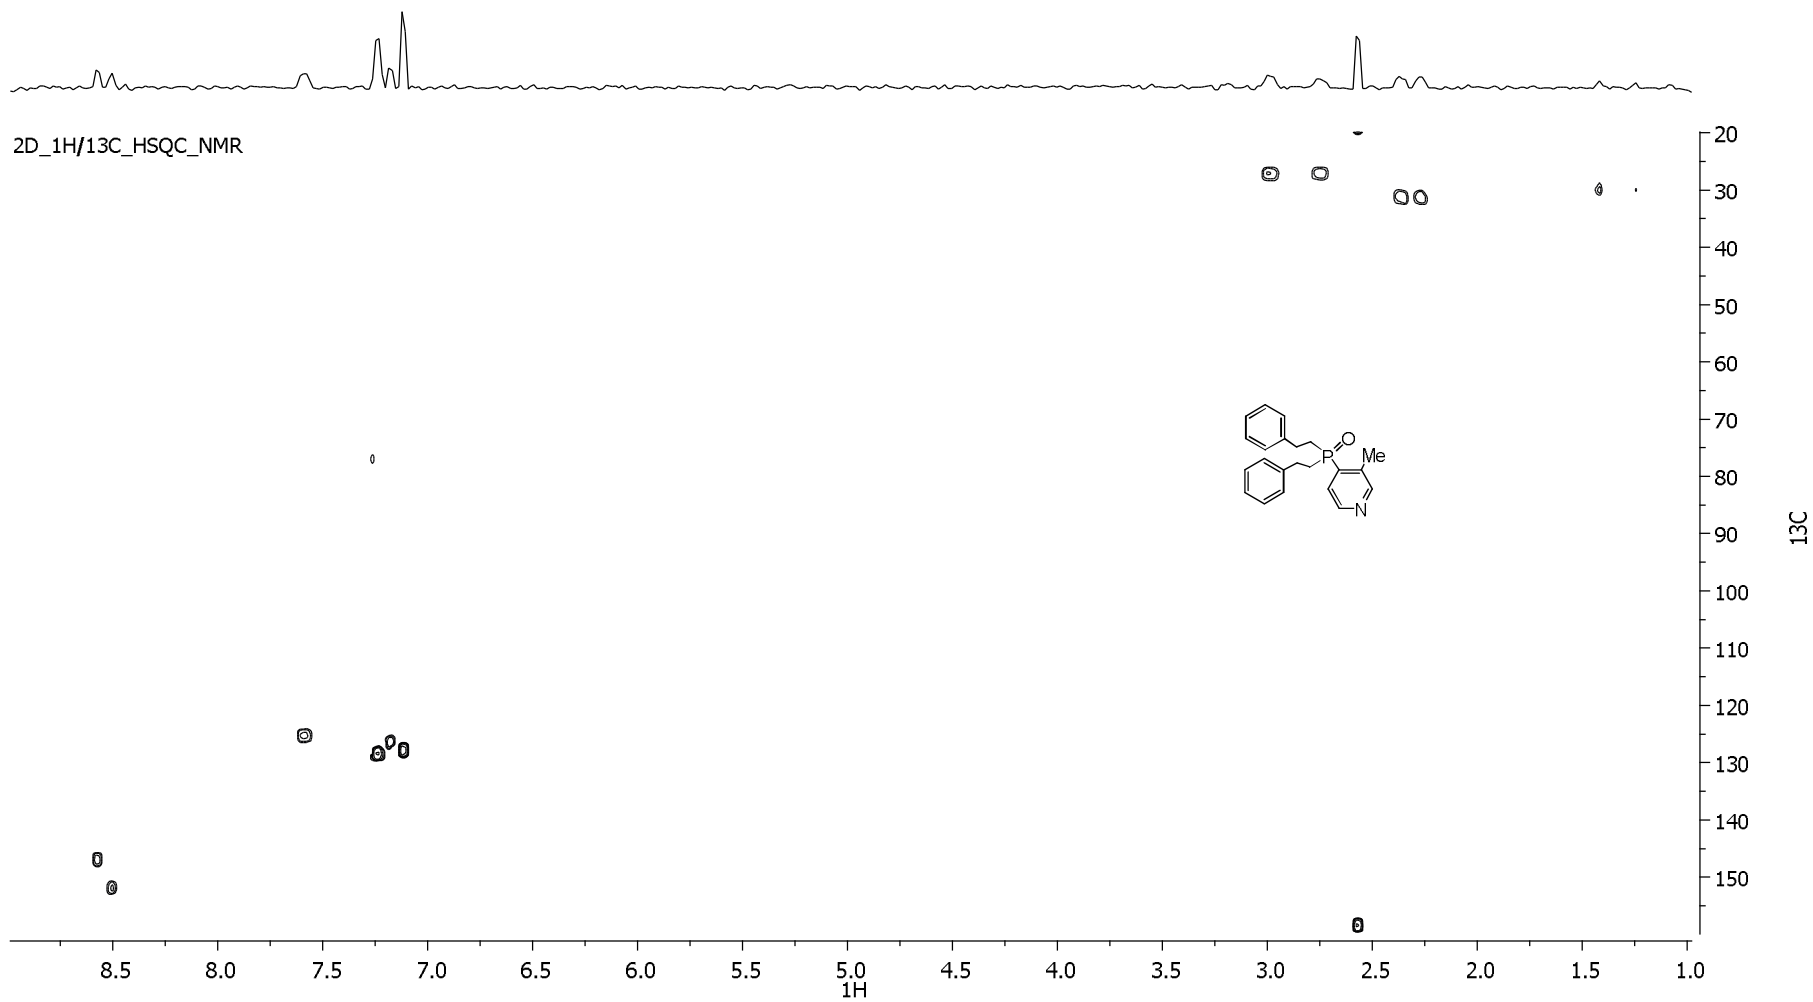

4-[Bis(2-phenylethyl)phosphoryl]-3-methylpyridine (6b)

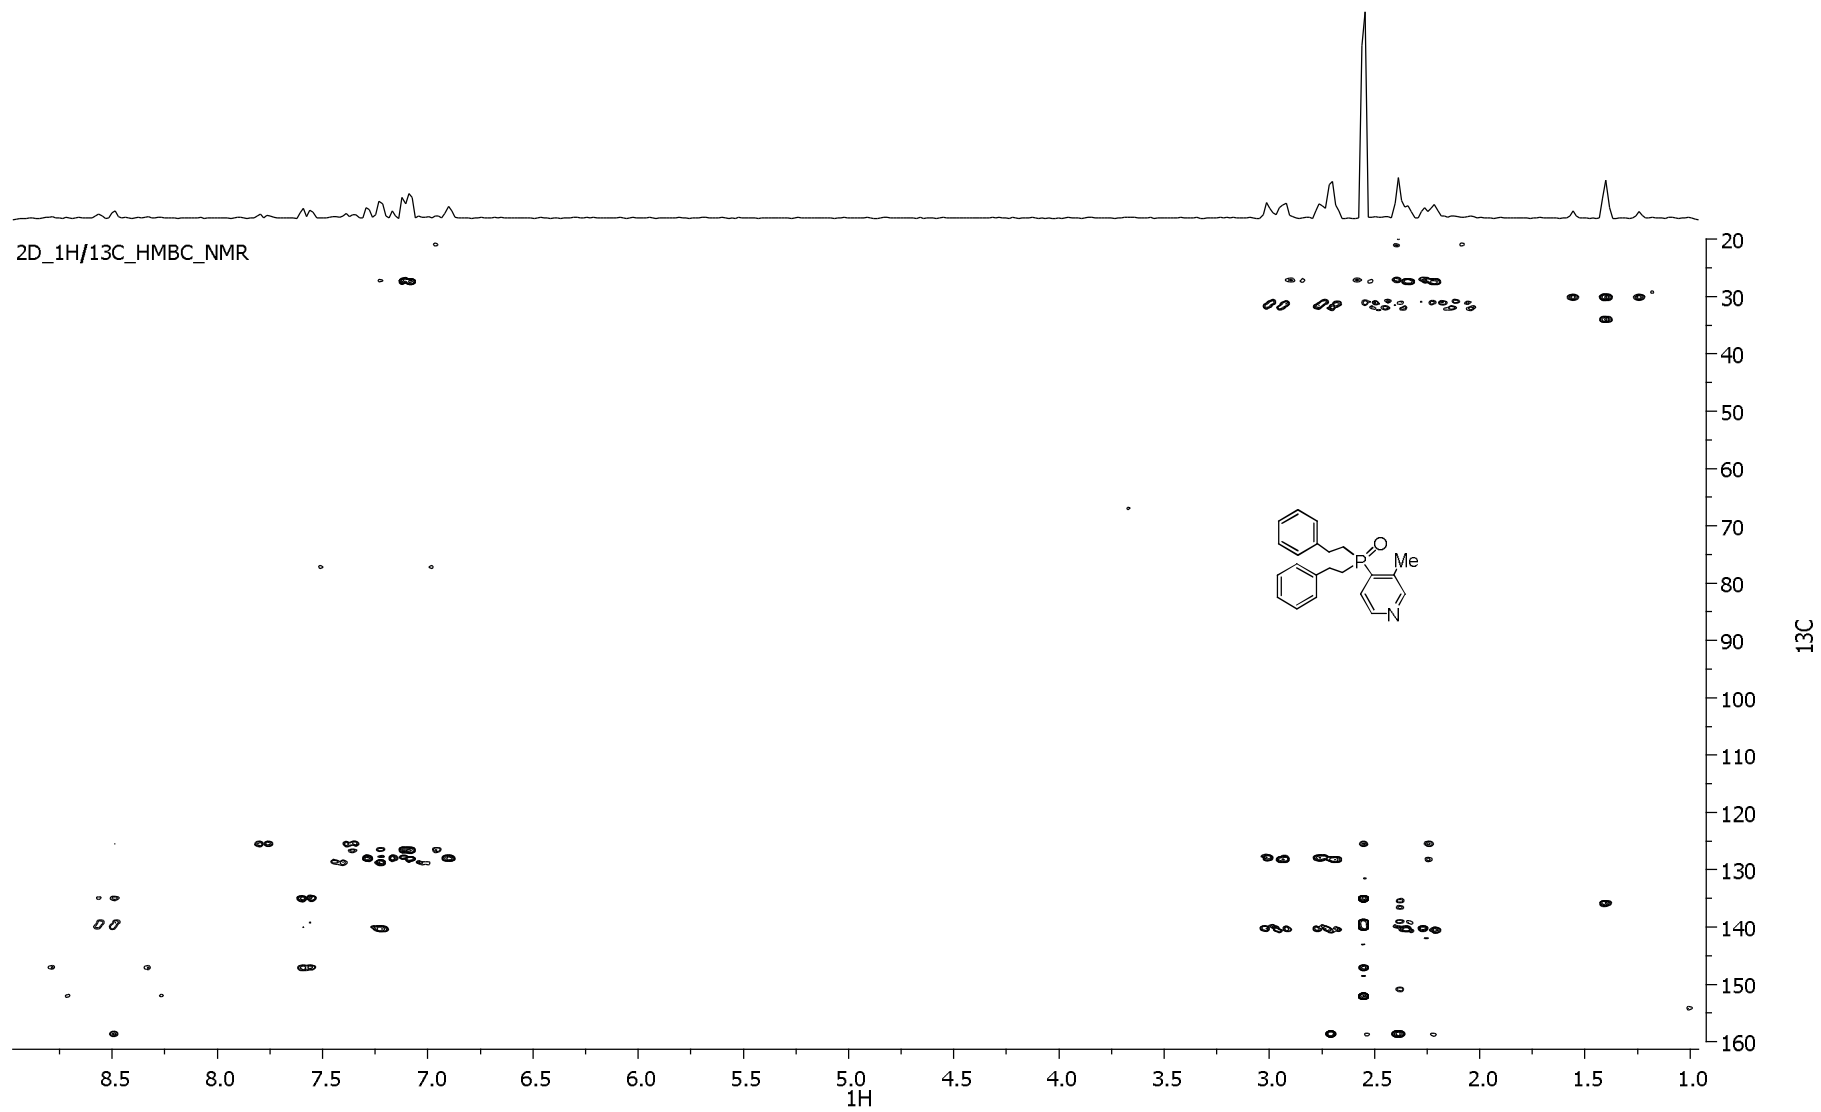

4-[Bis(2-phenylethyl)phosphoryl]-3-methylpyridine (6b)

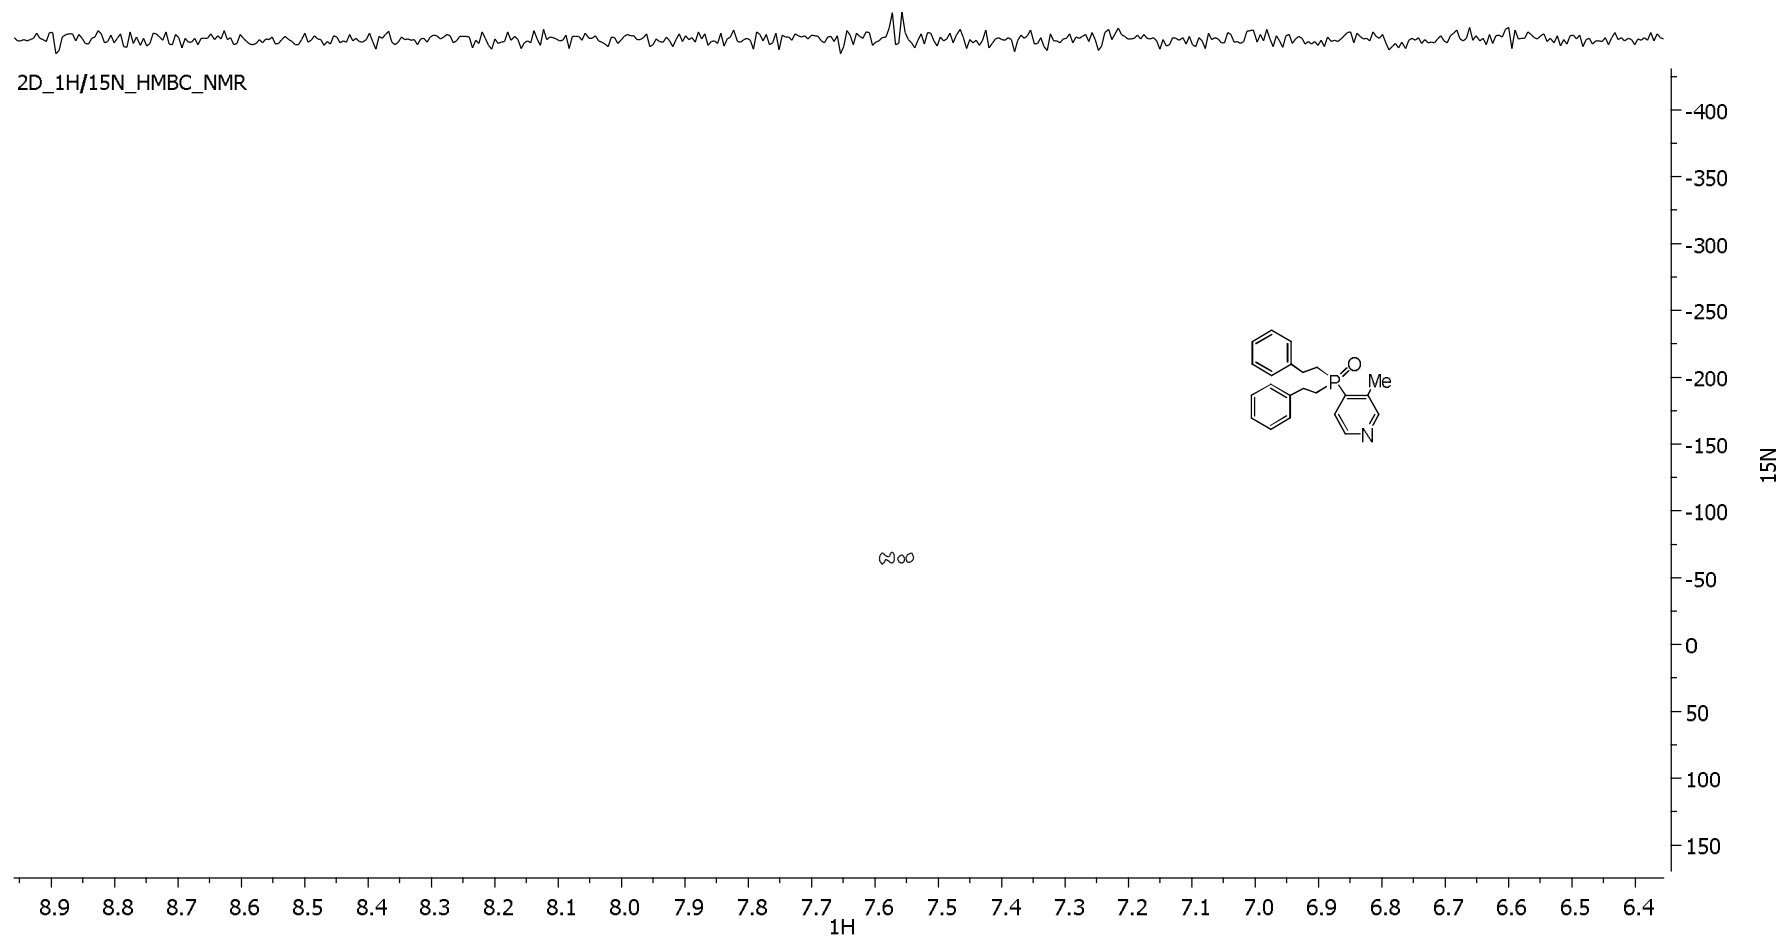

# 4-{Bis[2-(4-chlorophenyl)ethyl]phosphoryl}-3-methylpyridine (6c)

<sup>1</sup>H\_NMR

8.58  
8.58  
8.57  
8.52  
8.51  
7.54  
7.53  
7.51  
7.50  
7.21  
7.20  
7.05  
7.03

2.99  
2.98  
2.97  
2.95  
2.94  
2.93  
2.92  
2.90  
2.74  
2.73  
2.72  
2.70  
2.69  
2.68  
2.65  
2.56  
2.32  
2.31  
2.29  
2.27  
2.26  
2.25  
2.23  
2.22  
2.21  
2.20

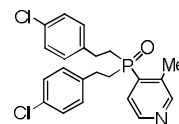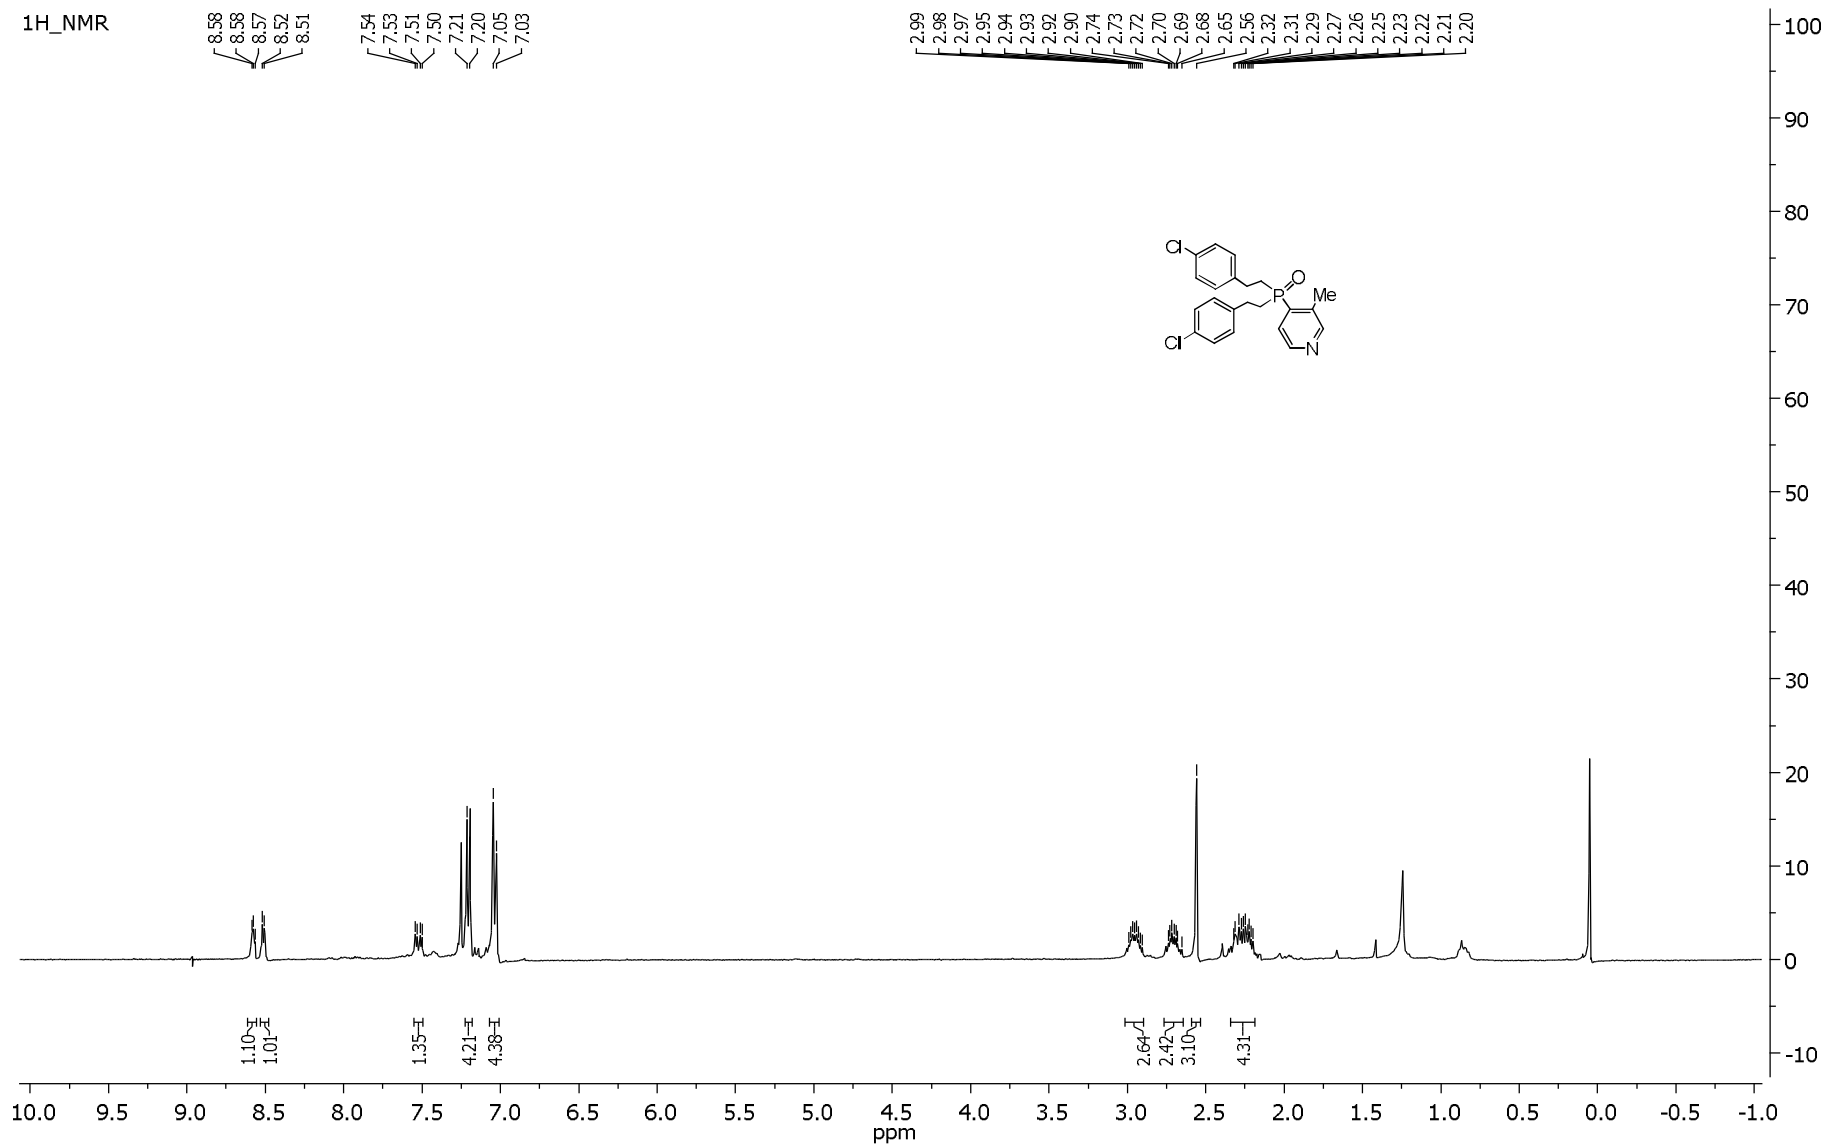



# 4-{Bis[2-(4-chlorophenyl)ethyl]phosphoryl}-3-methylpyridine (6c)

<sup>13</sup>C\_NMR

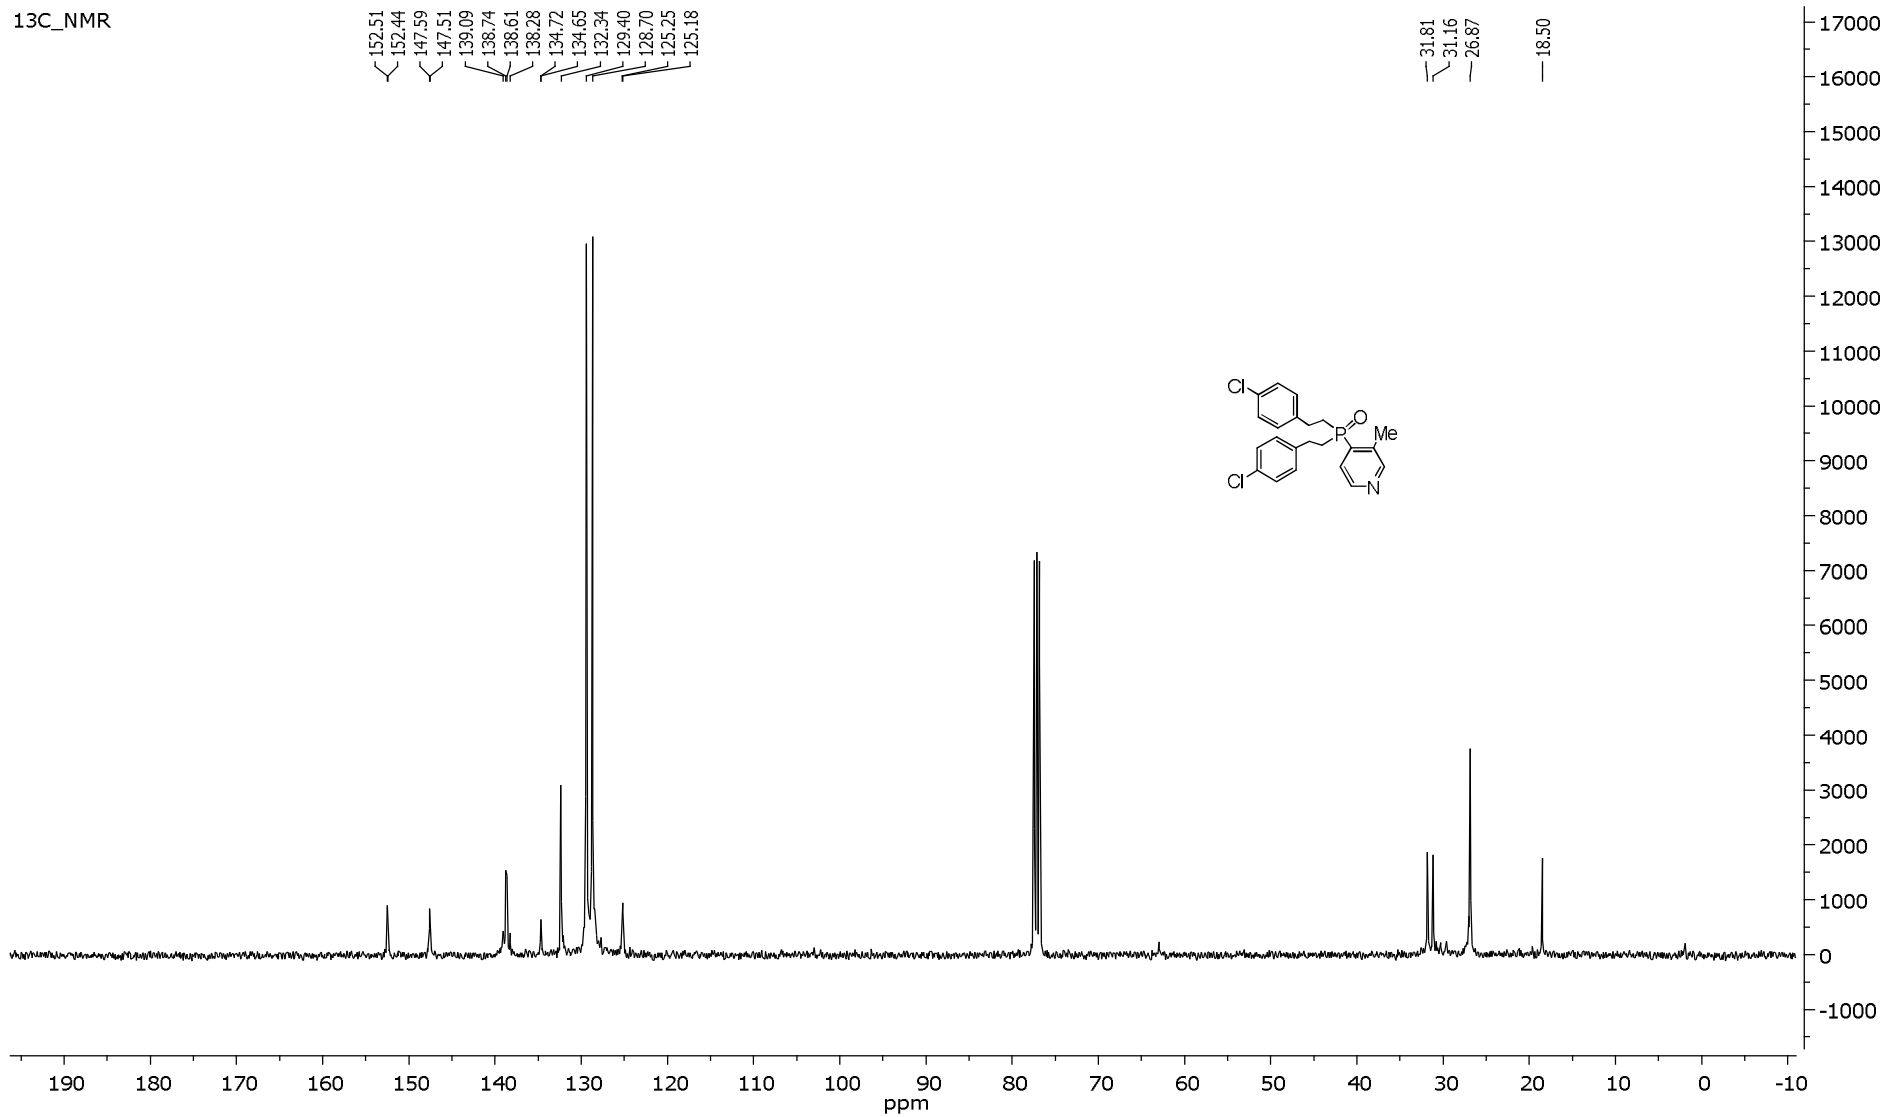

4-{Bis[2-(4-chlorophenyl)ethyl]phosphoryl}-3-methylpyridine (6c)

<sup>31</sup>P\_NMR

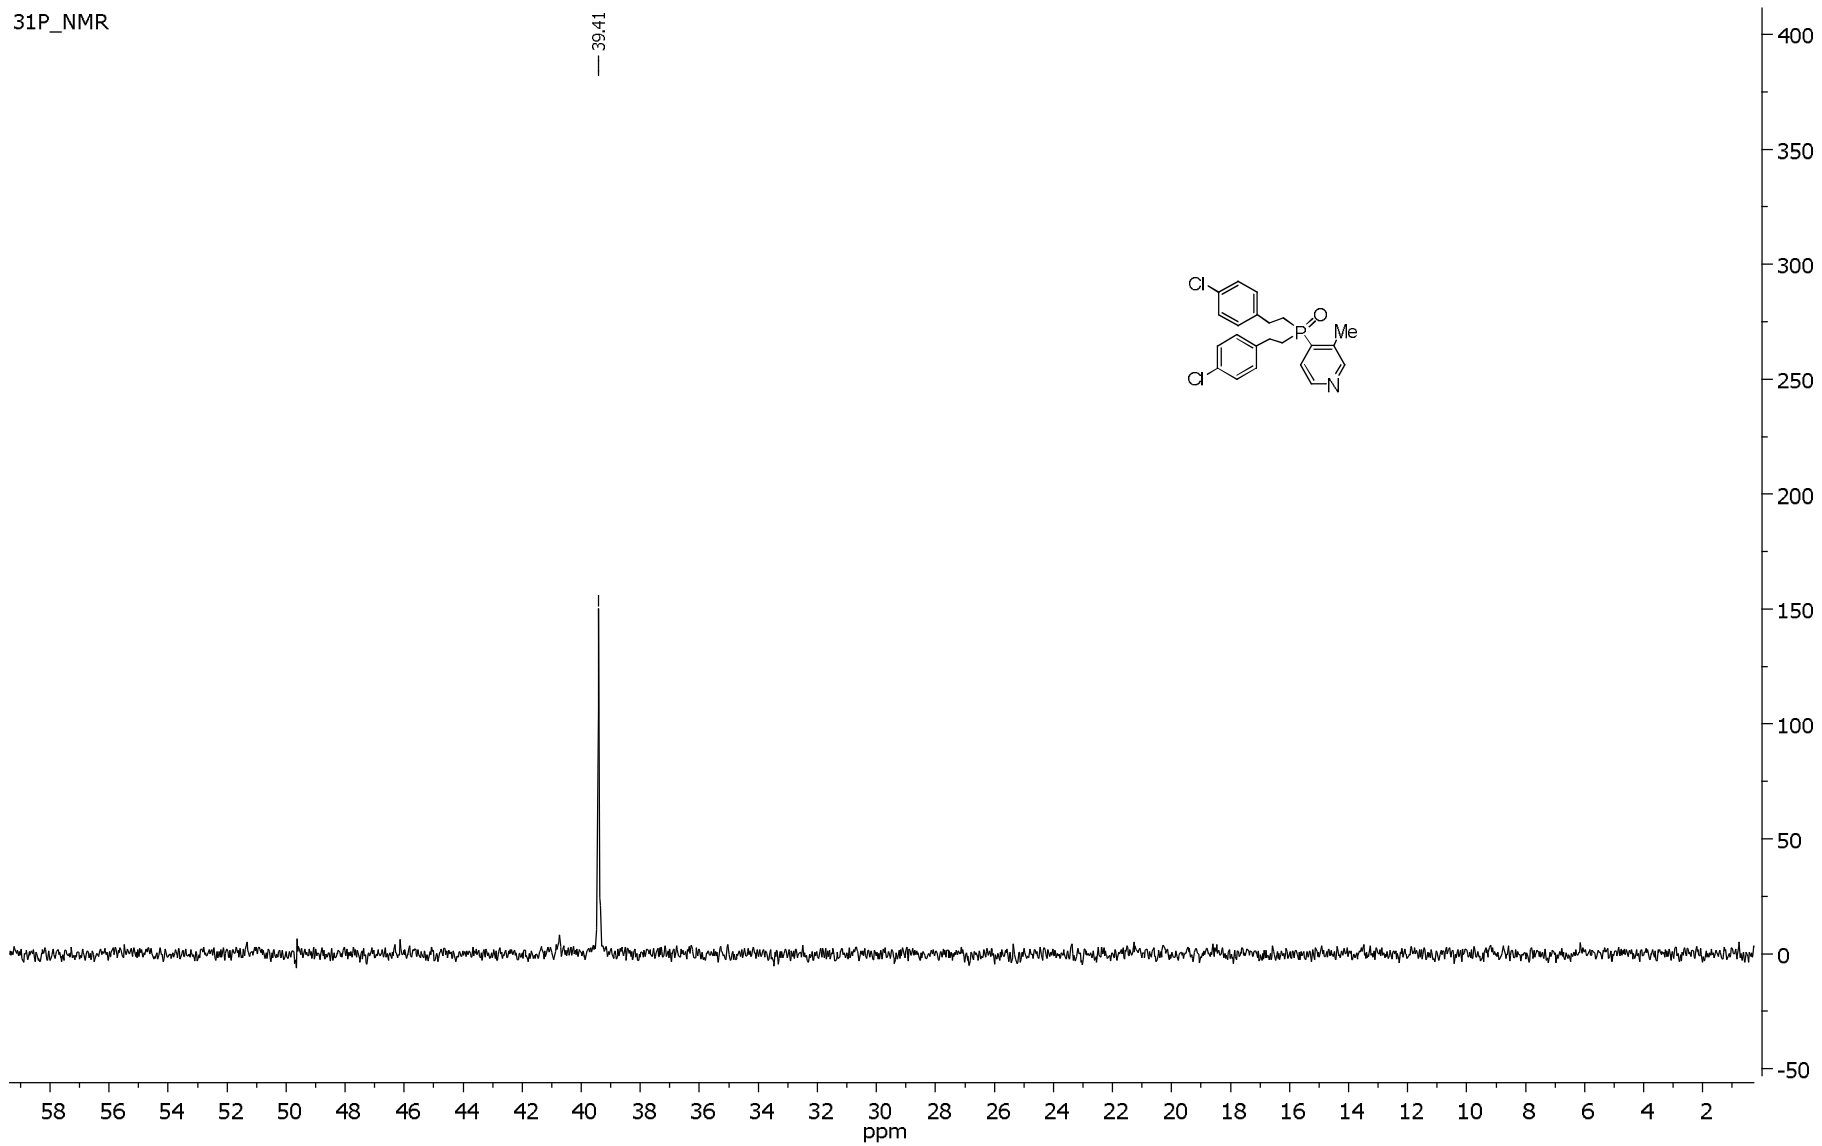

# 4-[Bis(2-phenylpropyl)phosphoryl]-3-methylpyridine (6d)

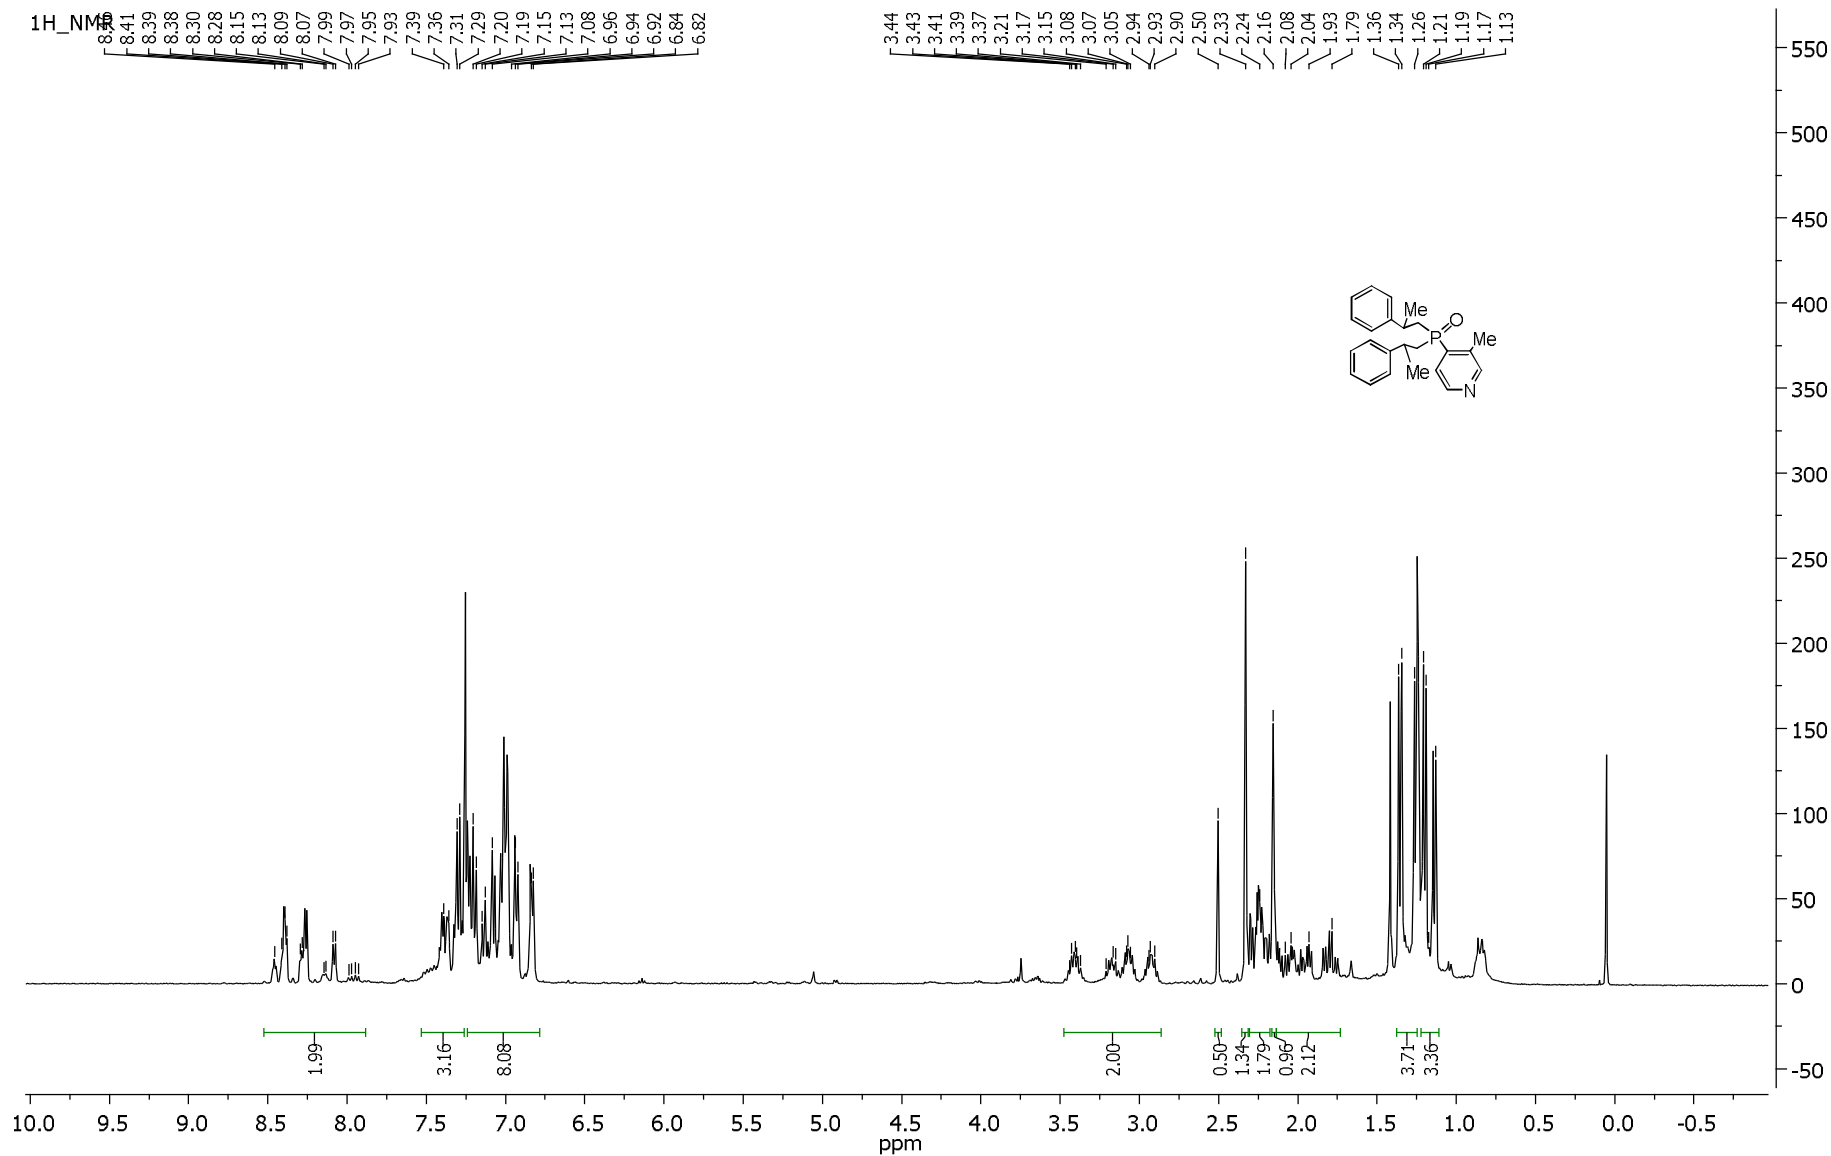

# 4-[Bis(2-phenylpropyl)phosphoryl]-3-methylpyridine (6d)

<sup>13</sup>C\_NMR

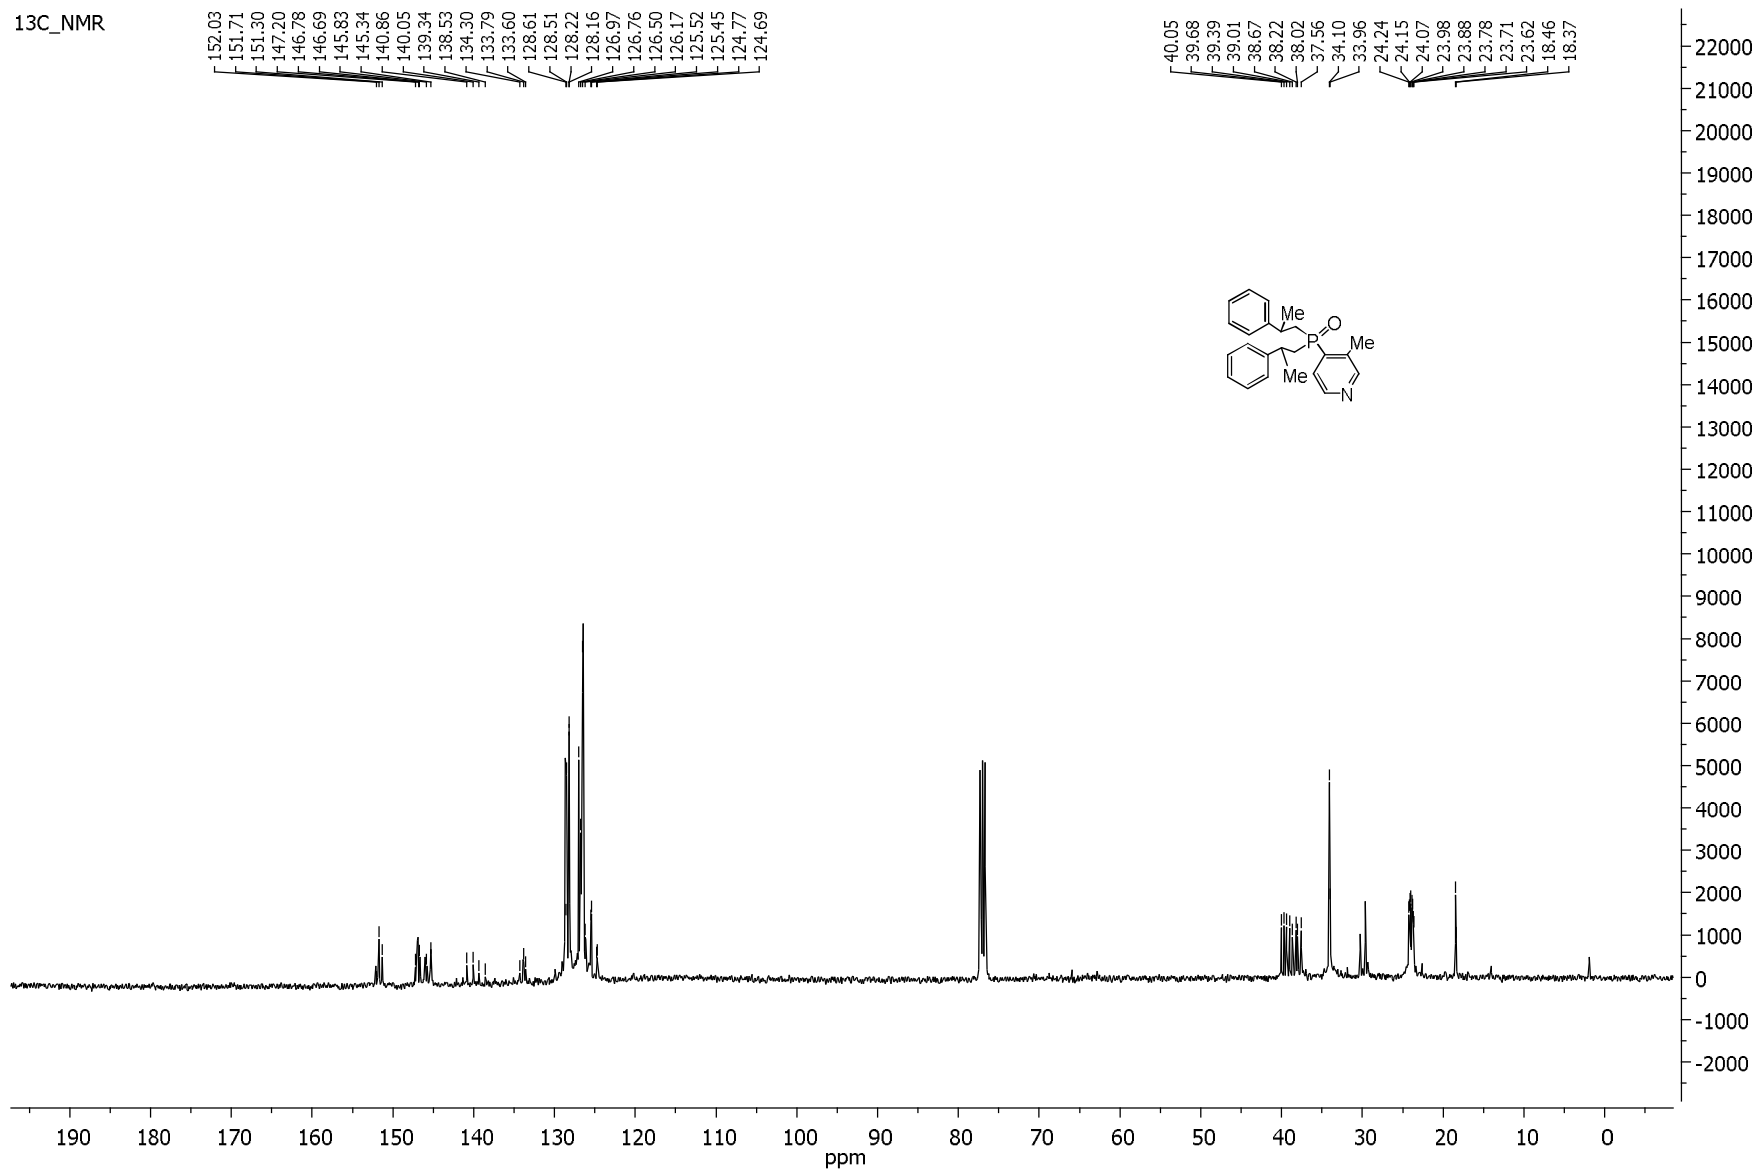

4-[Bis(2-phenylpropyl)phosphoryl]-3-methylpyridine (6d)

31P\_NMR

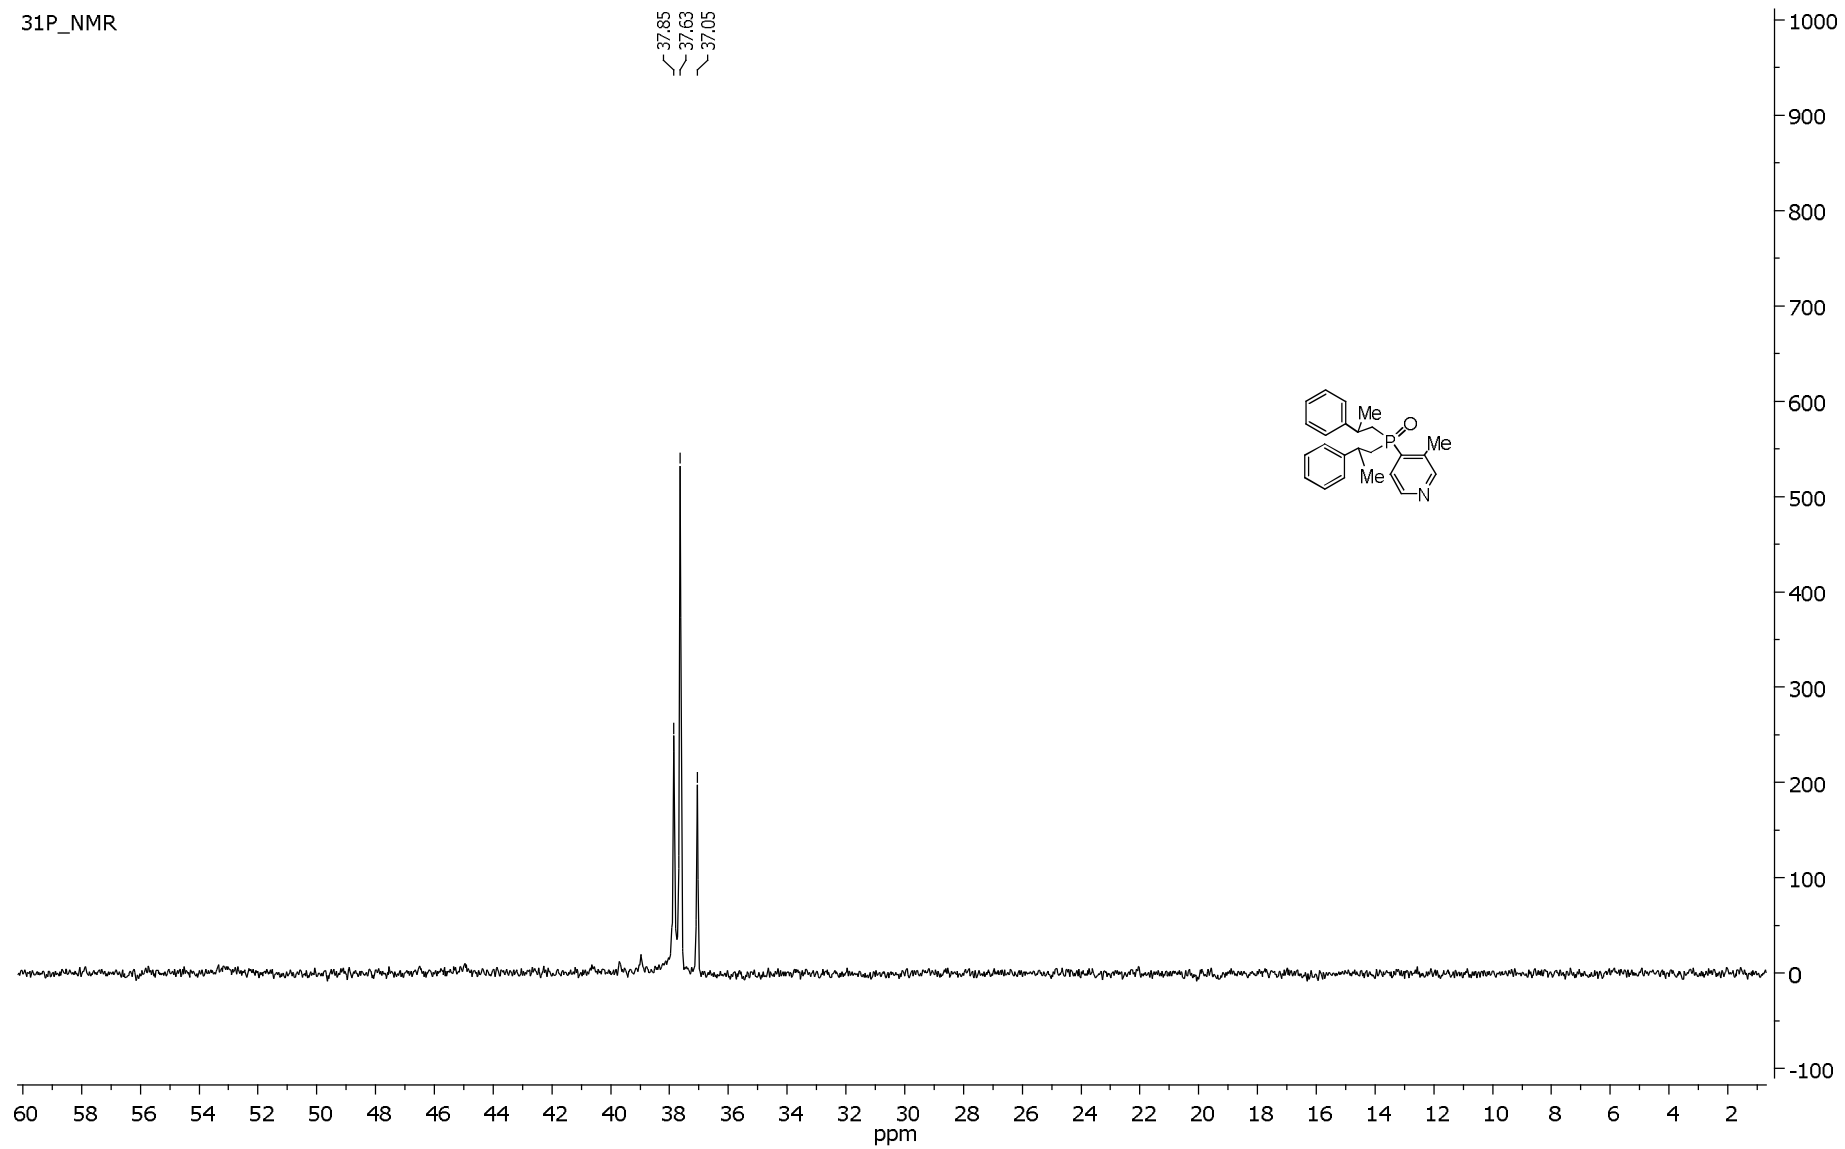

4-[Bis(2-phenylpropyl)phosphoryl]-3-methylpyridine (6d)

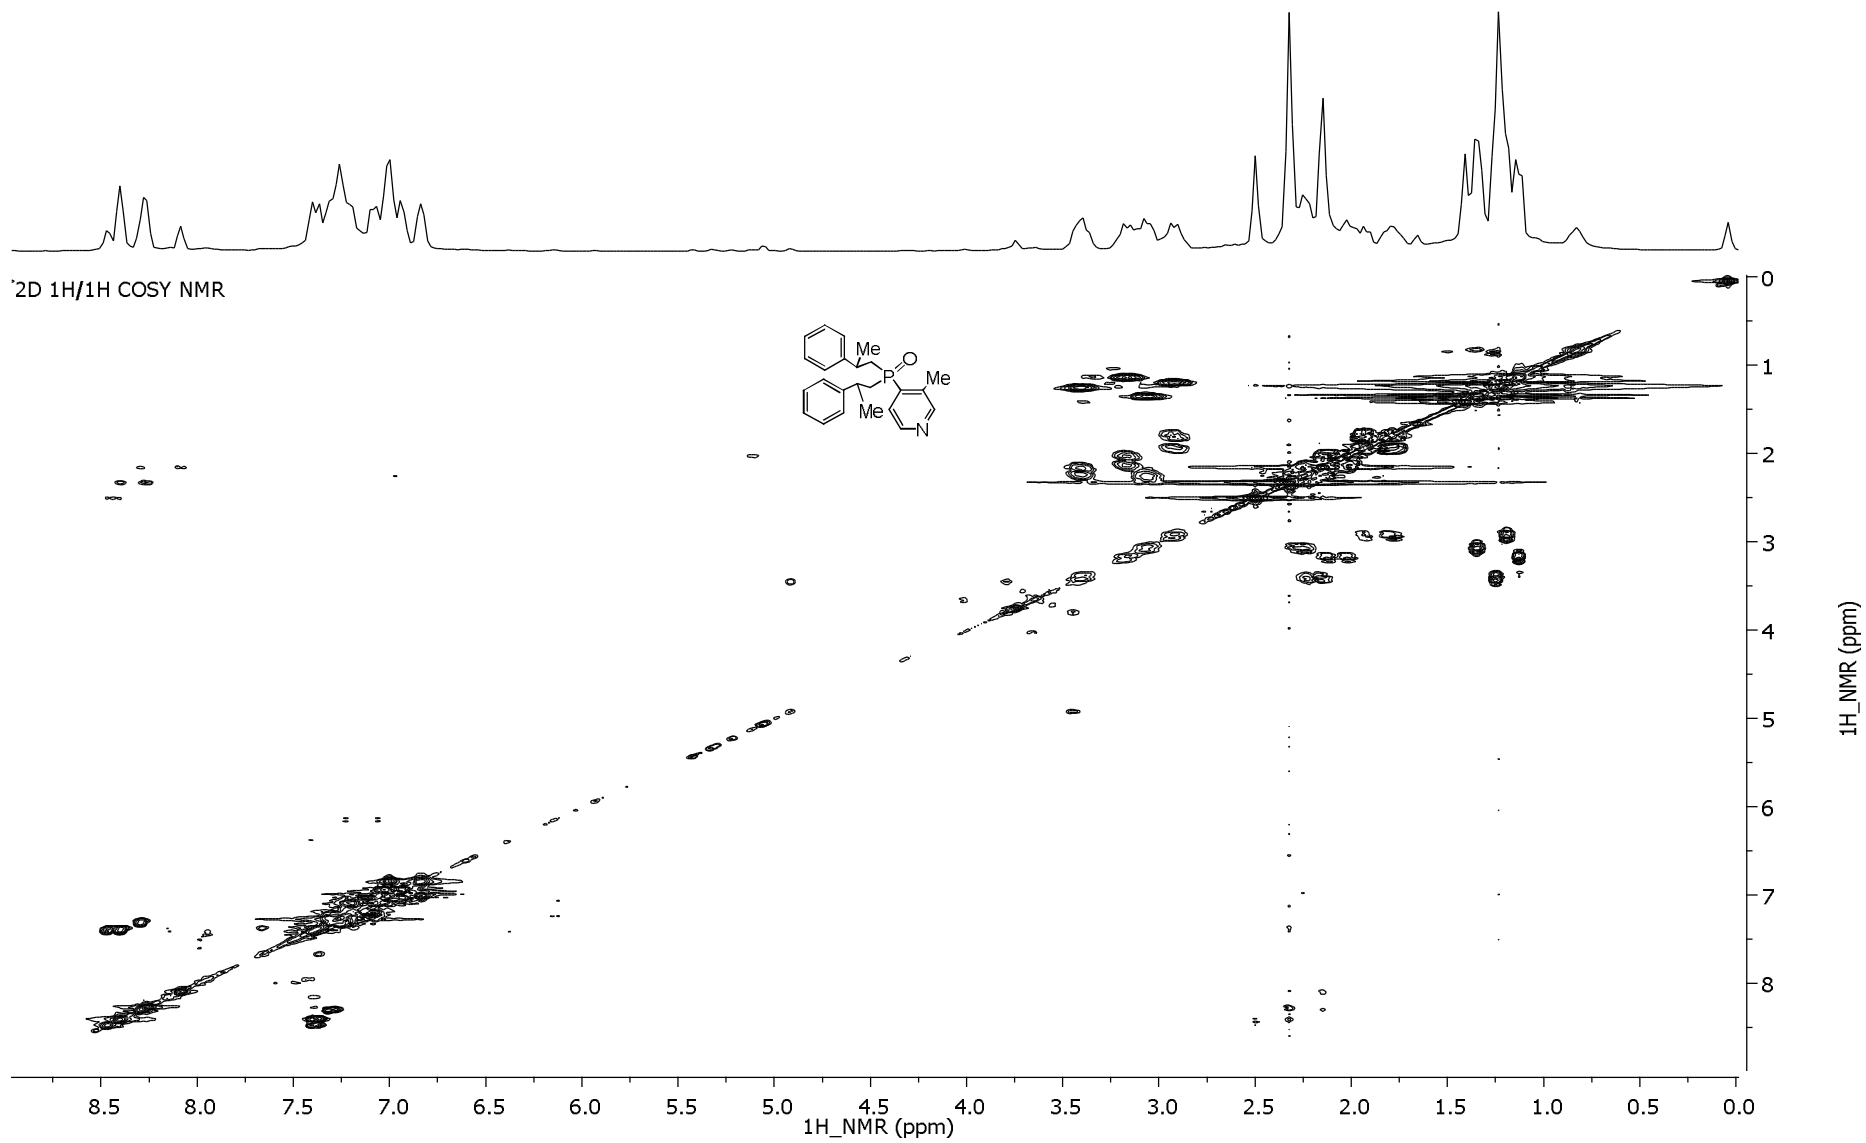

4-[Bis(2-phenylpropyl)phosphoryl]-3-methylpyridine (6d)

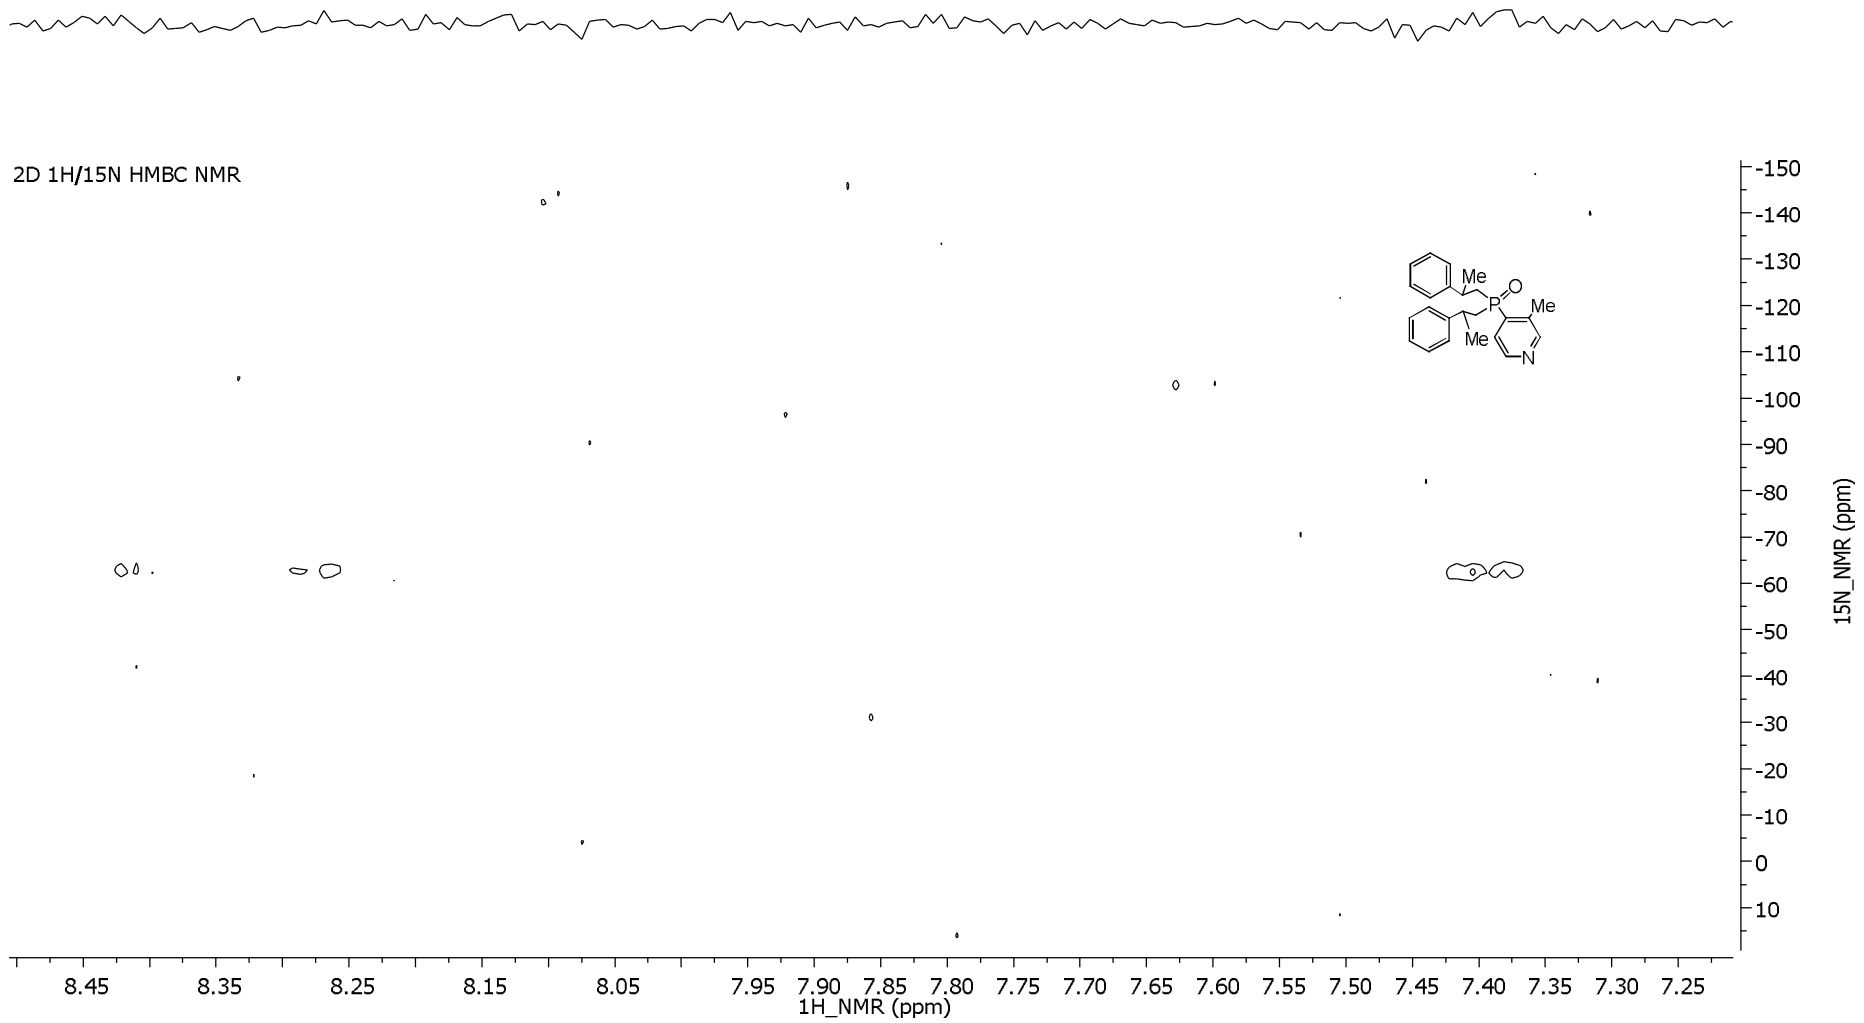

# 4-[Bis(2-phenylethyl)thiophosphoryl]pyridine-d<sub>4</sub>

1H\_NMR

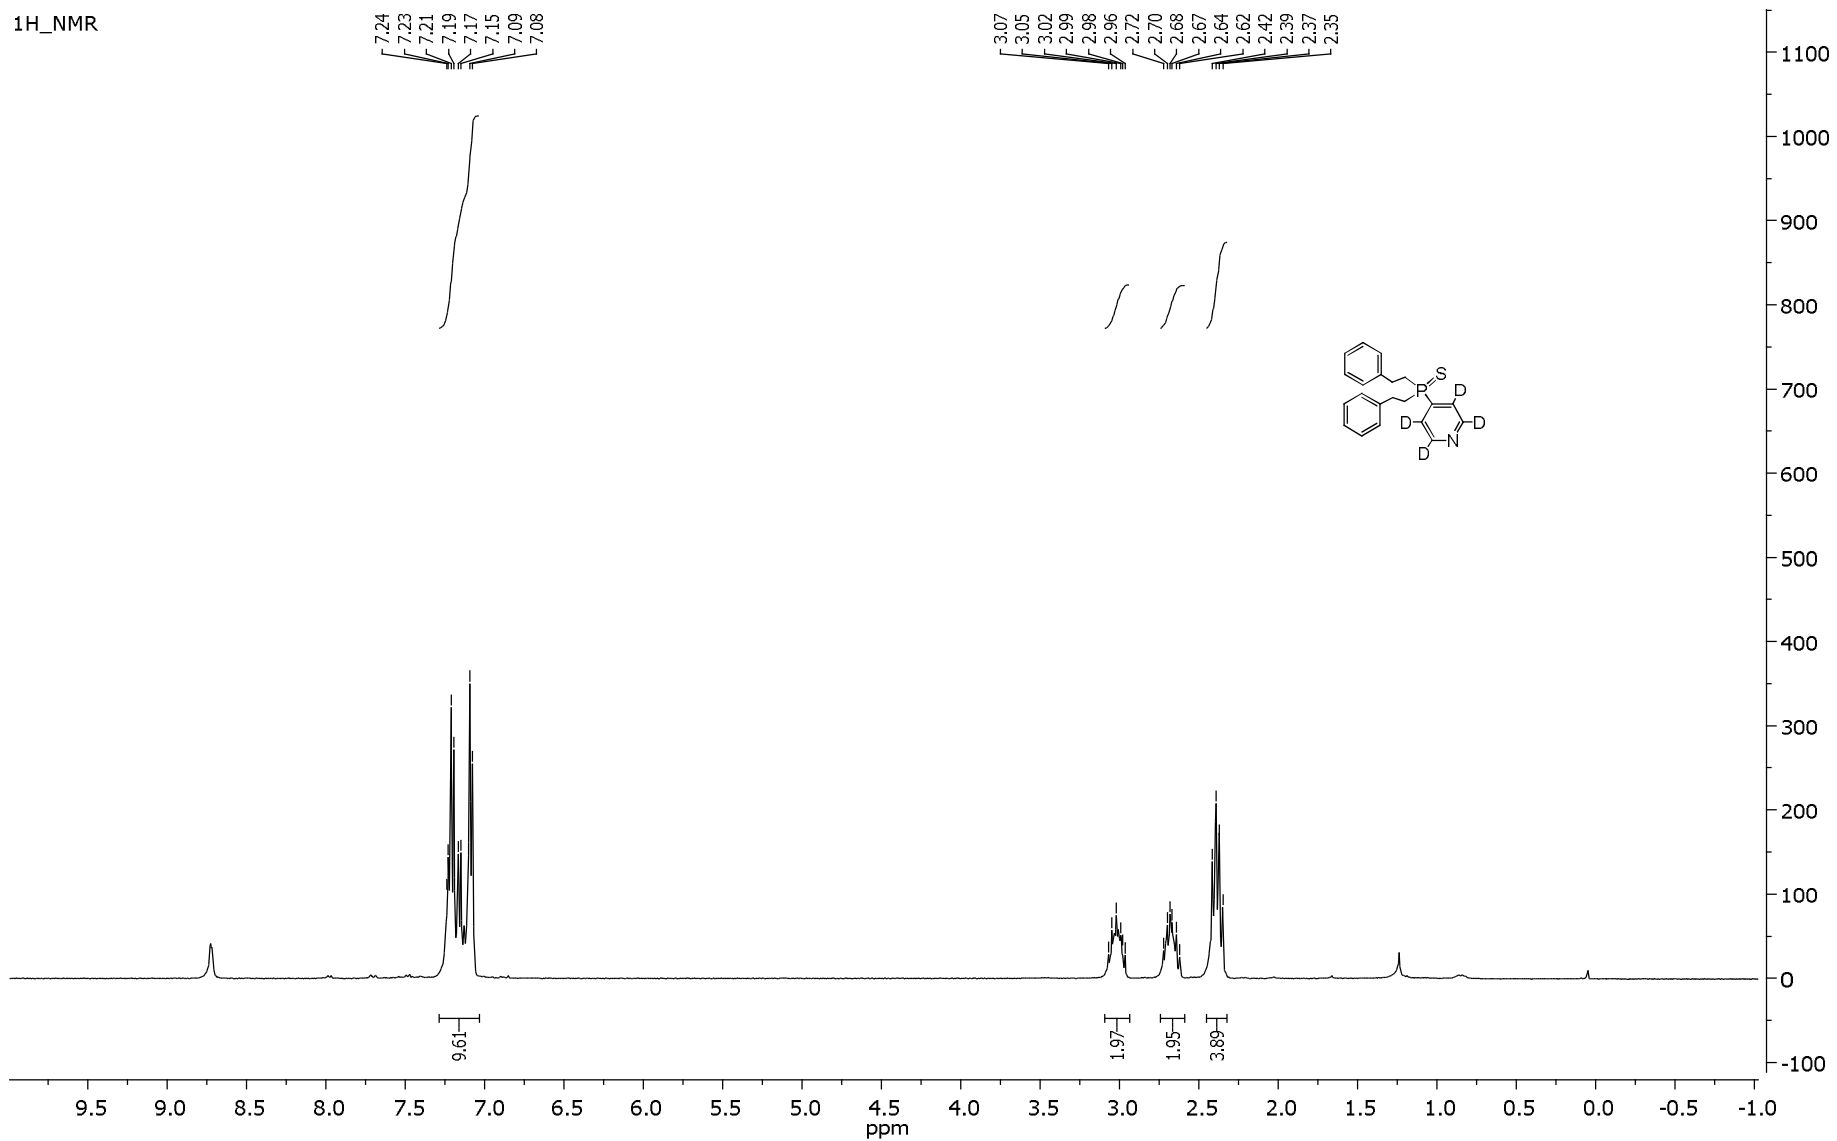



# 4-[Bis(2-phenylethyl)thiophosphoryl]pyridine-d<sub>4</sub>

<sup>13</sup>C\_NMR

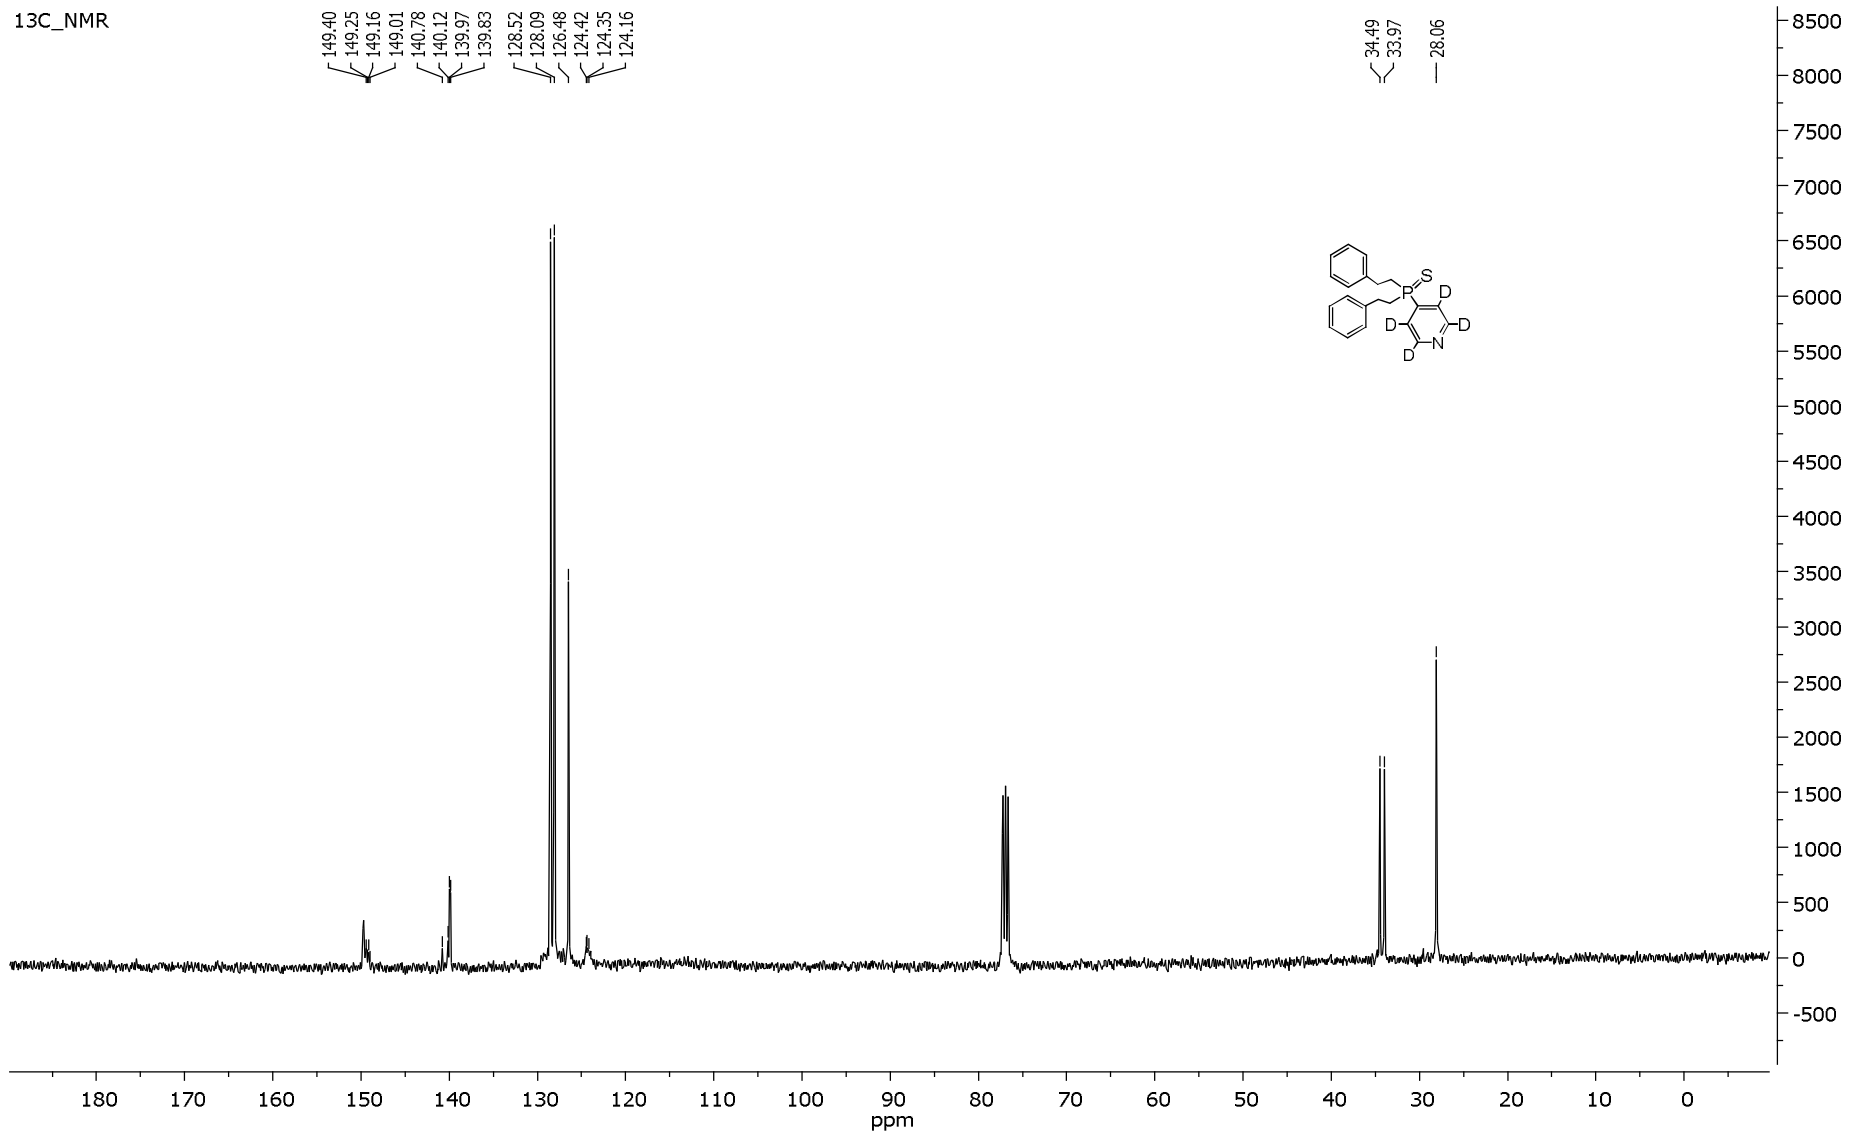

# 4-[Bis(2-phenylethyl)thiophosphoryl]pyridine-d<sub>4</sub>

31P\_NMR

45.19

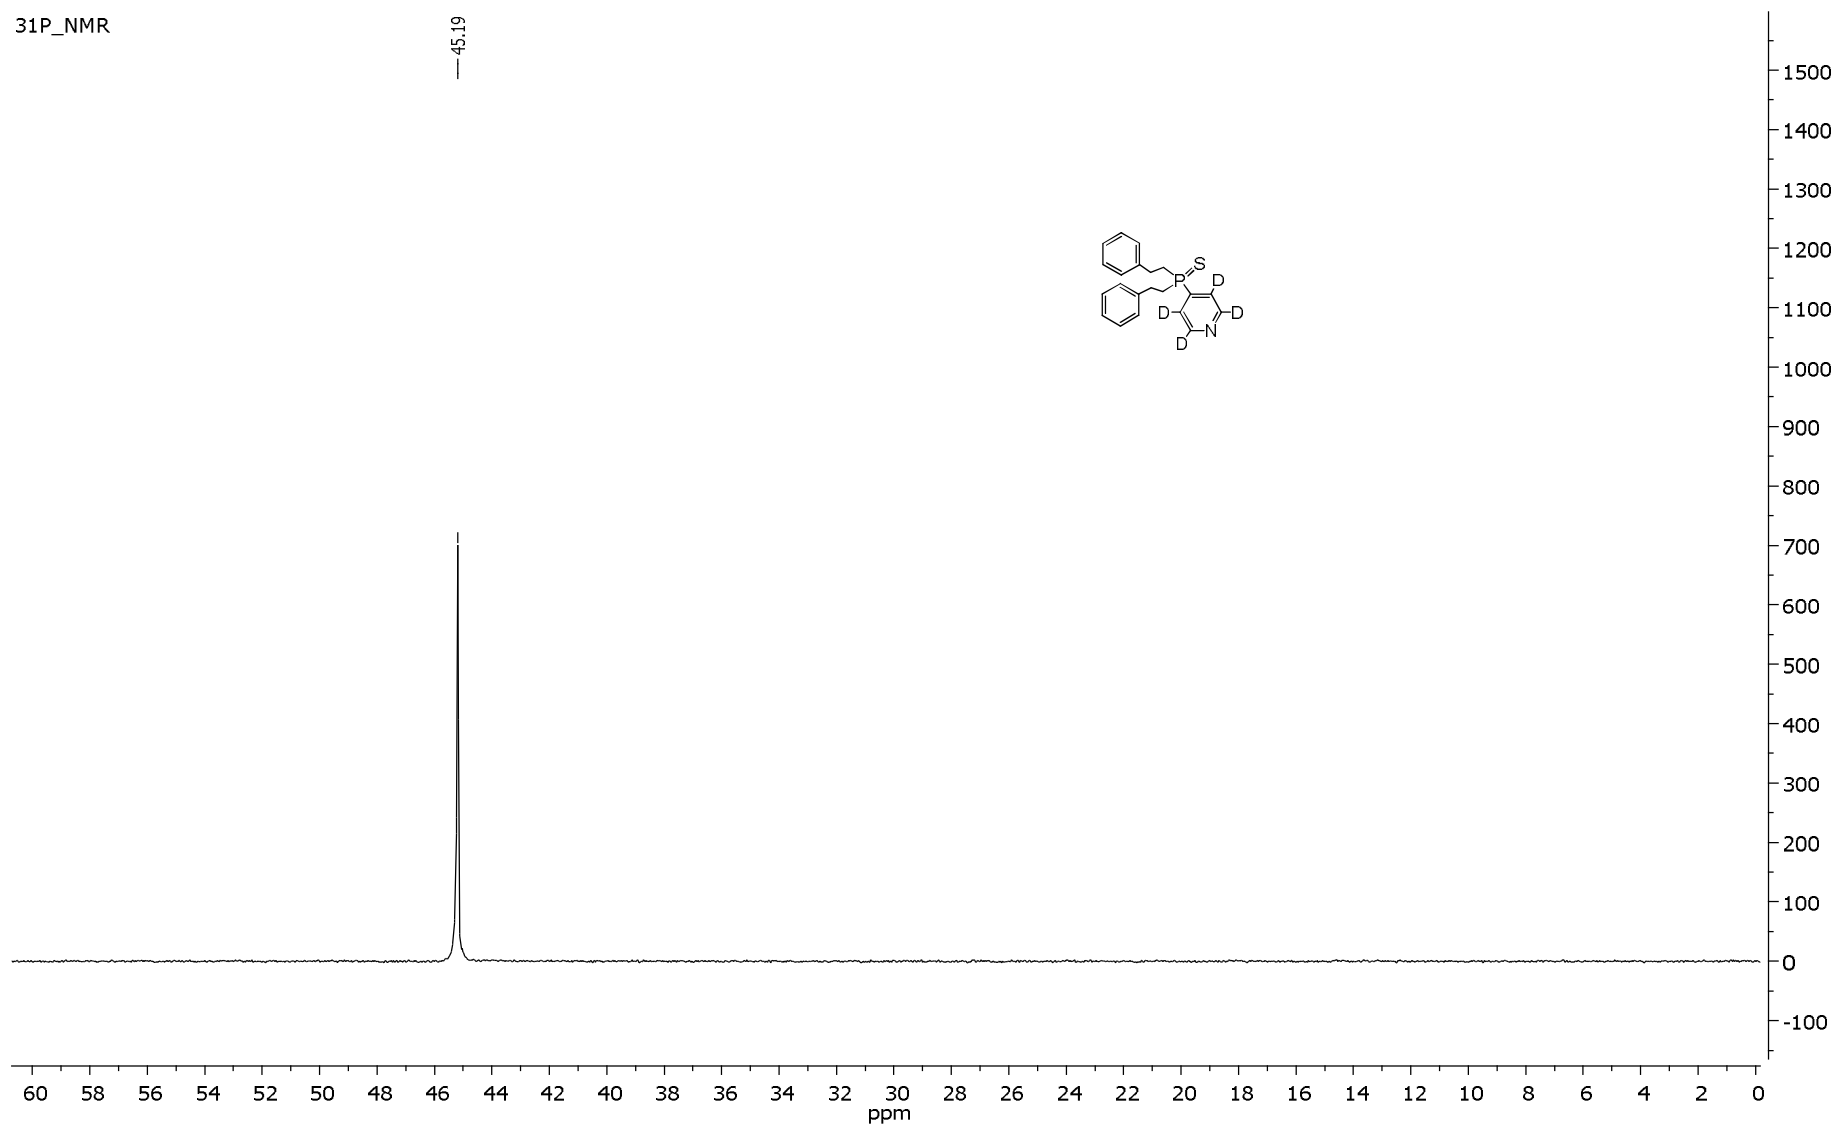

S90

# 4-[Bis(2-phenylethyl)phosphino]pyridine (10)

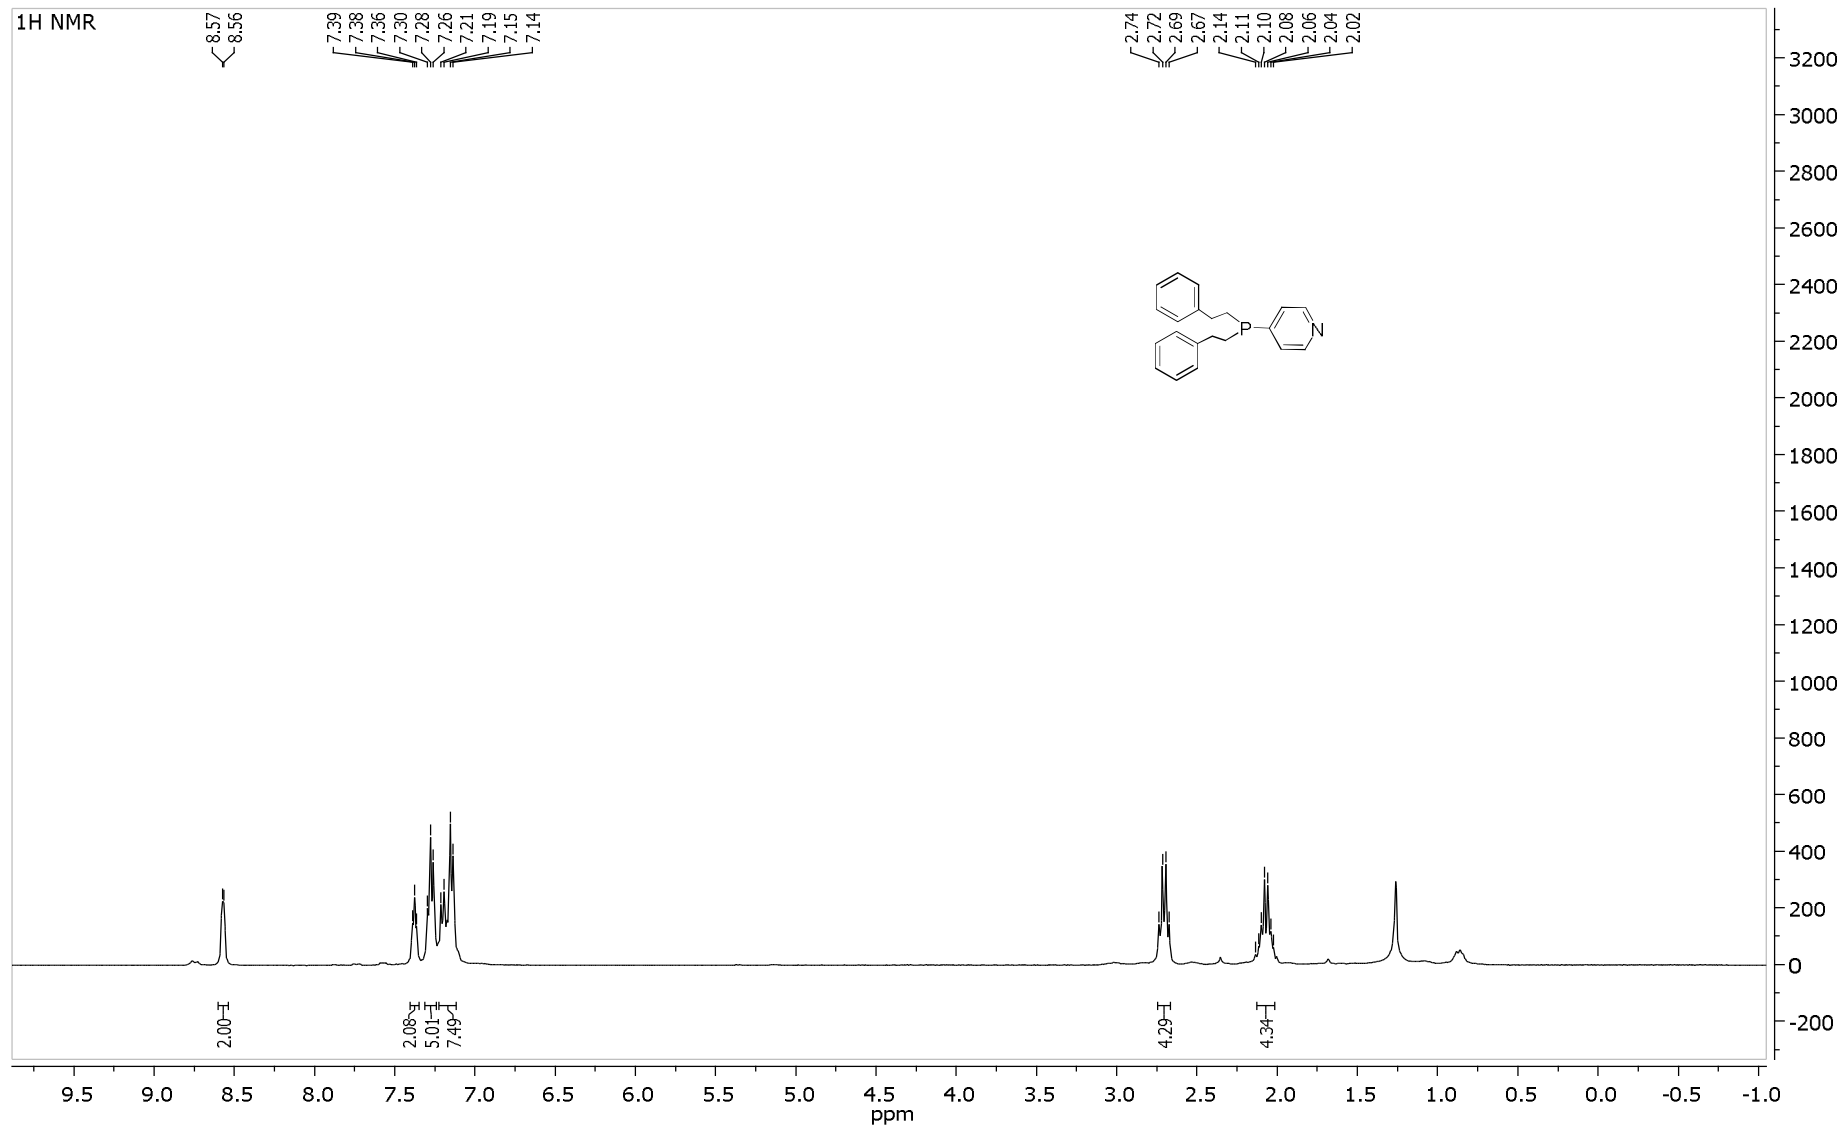

# 4-[Bis(2-phenylethyl)phosphino]pyridine (10)

<sup>13</sup>C\_NMR

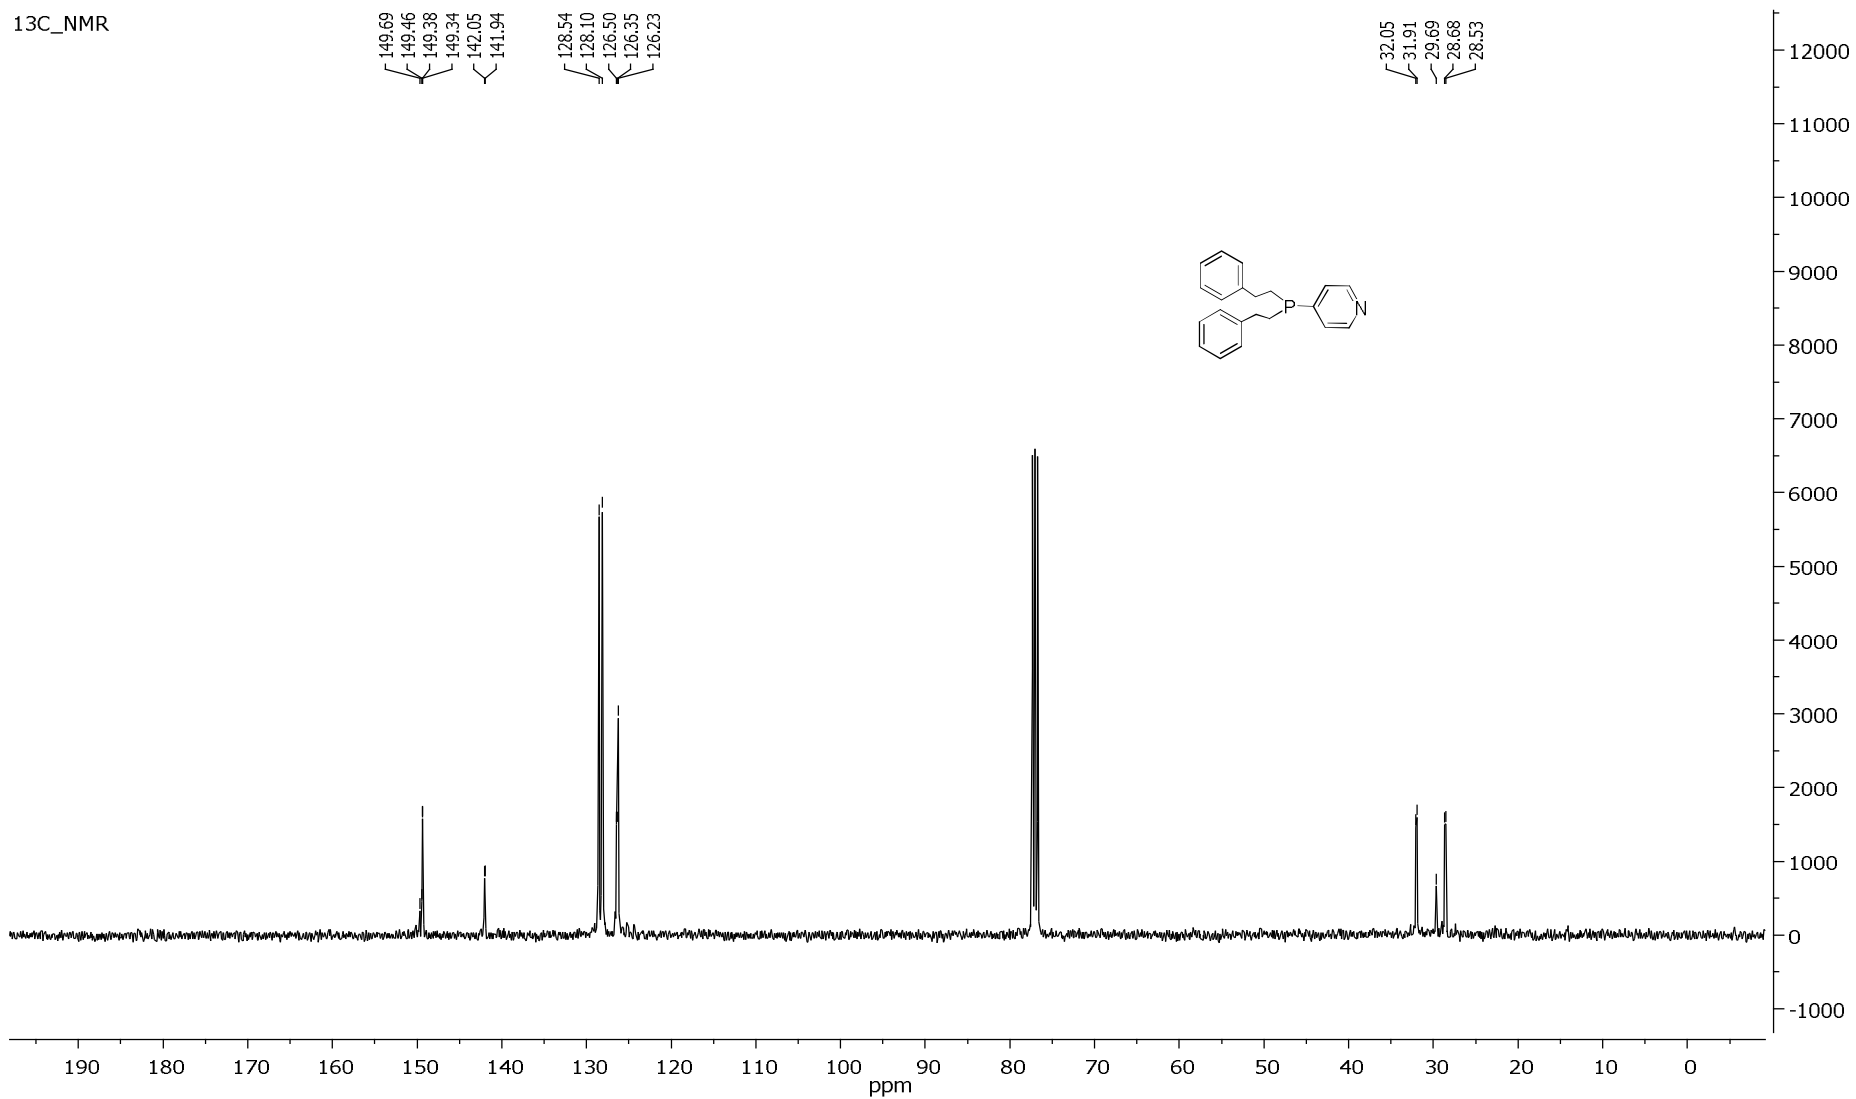

# 4-[Bis(2-phenylethyl)phosphino]pyridine (10)

<sup>31</sup>P-NMR

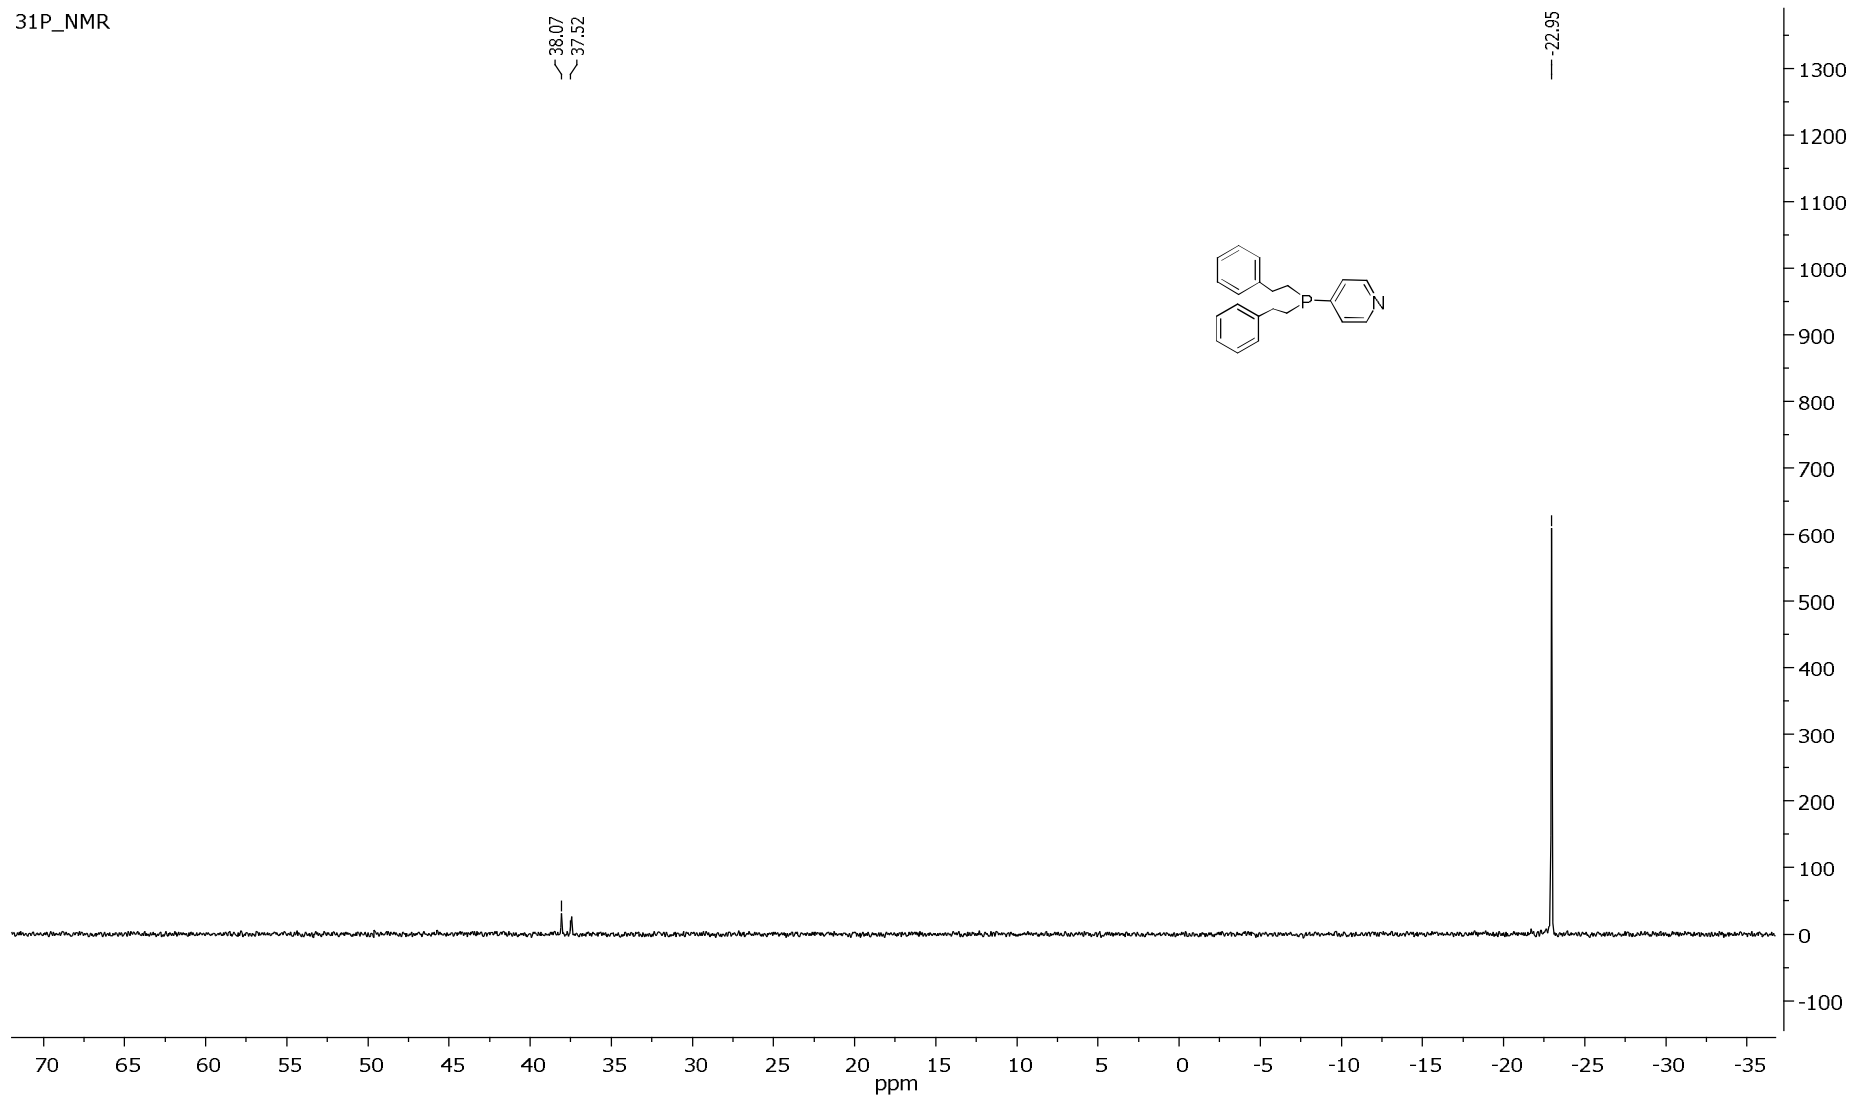

Supplement: c8cc01155a1.pdf [file c8cc01155a1.pdf]
